# Supplementary material for: Integrating taxonomic, functional, and strain-level profiling of diverse microbial communities with bioBakery 3
Source: eLife. 2021 May 4;10:e65088. doi: 10.7554/eLife.65088 (PMC8096432; doi:10.7554/eLife.65088)
Supplement: Supplementary file 2. [file elife-65088-supp2.xlsx]

## Sheet: Common Components
	Previous bioBakery release	bioBakery 3 release
Genome collection	NCBI genomes release June 2014	NCBI genomes release January 2019
Protein reference	UniProt/UniRef 201407 (not in sync with genomes)	UniProt/UniRef 201001 (in sync with genomes)
Documentation	Online manuals + tutorials	Documentation updated for new software
User support	Separate Google groups	Unified Discourse forum (https://forum.biobakery.org/)
(Pan)genome annotation	Homology-based search against UniRef90/50	Directly exported from UniRef90/50
Platform	Python 2.7	Python 3.7
Source code	Mercurial + Bitbucket	Git + Github (https://github.com/biobakery)
Installation	Mixed	PyPI, Conda, Docker, VagrantBox, Google Cloud, AMI

## Sheet: MetaPhlAn
	MetaPhlAn2	MetaPhlAn 3
Database installation	Manual fetch	Automatic download and build
Database: # of species	175 Archaeal species	561 Archaeal species
	3135 bacterial species	9795 bacterial species
	52 eukaryotic species	122 eukaryotic species
	2997 viral species	2915 viral species
QC	No	<70bp reads discarded
		Aligments <5 MAPQ discarded
Input parsing	Bio.SeqIO	Bio.SeqIO.QualityIO.FastqGeneralIterator / Bio.SeqIO.FastaIO.SimpleFastaParser
Default output format	Clade name	Clade name
	Relative abundance in percentage	Clade NCBI taxonomy ID
		Relative adundance in percentage
		Additional species merged according to ANI score or species comprising species groups
Unknown estimation	No	Yes, scale relative abundances to the number of reads mapping to known clades
CAMI profiling Output Format	No	Yes
UniFrac beta diversity calculation	No	Yes

## Sheet: HUMAnN
	HUMAnN 2.0	HUMAnN 3.0
Dependencies	MetaPhlAn 2.0 dependencies (including Bowtie 2)	MetaPhlAn 3.0 dependencies (including Bowtie 2)
	DIAMOND 0.8	DIAMOND 0.9
Search space	Pangenomes of 3.3K cellular microbes	Pangenomes of 10.5K cellular microbes (3x increase)
	24M UniRef90 families (v201407)	97M UniRef90 families (v201901, 3.5x increase)
	11M UniRef50 families (v201407)	32M UniRef50 families (v201901, 3x increase)
Nucleotide search	bowtie2 "--very-sensitive"	User configurable (same defaults)
	Use all best hits from bowtie2	Filter target sequences by coverage (more specific)
Translated search	DIAMOND defaults	User configurable (default "--top 1" hits)
	UniRef90 alignments > 90% identity	UniRef90 alignments > 80% identity (more sensitive)
	Apply downstream coverage filters	No changes
Metabolic pathways	MetaCyc v19	MetaCyc v24
Taxonomic inference	UniRef-assigned family LCAs	New error-tolerant family LCAs

## Sheet: StrainPhlAn
	StrainPhlAn	StrainPhlAn 3
Database installation	Manual fetch	Automatic download and build
Database: # of species	175 Archaeal species	561 Archaeal species
	3135 bacterial species	9795 bacterial species
	52 eukaryotic species	122 eukaryotic species
	2997 viral species	2915 viral species
Consensus markers reconstruction	StrainPhlAn	CMSeq
Phylogeny reconstruction	StrainPhlAn	PhyloPhlAn 3
Breadth of coverage	No	Yes
MSA	MUSCLE	MUSCLE
	mafft	mafft
		opal
		pasta/upp
		any user defined tool
Phylogeny inference methods	RAxML	FastTree
		RAxML
		IQ-TREE
		ASTRAL
		ASTRID
		any user defined tool
Two steps phylogeny inference	No	Yes
Mapping	blast	blast
		diamond
		any user defined tool
Trimming	strip ends	strip ends
	gappy regions	gappy regions
		not variant regions
		too variant regions
		any user defined tool
MSA scoring	MUSCLE	MUSCLE
		trident
		random
Substitution matrix	BLOSUM62	MIQS
		PFASUM60
		VtML240
		VTML200

## Sheet: PanPhlAn
	PanPhlan 1.3	PanPhlAn 3.0
Dependencies	BowTie2	Bowtie2
	samtools	samtools
Python dependencies	numpy	numpy
		pandas
		scipy
		sklearn
		matplotlib
		seaborn
Pangenome database	Manual download from DropBox	Automatic download of species of interest
Database content	Genes families across reference genomes	Genes families across reference genomes
		Bowtie2 indexes
		Annotation mapping file
Pangenome database size	~400 species	~2300 species
Output format	Genes families presence-absence matrix	Genes families presence-absence matrix
		Clustered Heatmap visualization
		Group of genes with similar profiles

## Sheet: PhyloPhlAn
	PhyloPhlAn	PhyloPhlAn2
Input type	proteomes	proteomes
		genomes
		MAGs
Costumizable Marker database	No	Yes
Available marker databases	PhyloPhlAn 400 universal markers	PhyloPhlAn 400 universal markers
		AMPHORA2
		>18,000 species-specific UniRef90 (>57.8M markers)
		any user-specified set of genes/proteins
Genome integration	No	Automatic retrieval of related genomes
Taxonomic integration	Based on 3,737 annotated genomes	Based on SGBs from >86,000 annotated genomes and >154,000 MAGs
Phylogenetic pipeline	concatenation	concatenation
		gene tree
MSA	muscle	muscle
		mafft
		opal
		pasta/upp
		any user defined tool
Phylogeney inference	FastTree	FastTree
		RAxML
		IQ-TREE
		ASTRAL
		ASTRID
		any user defined tool
Two steps phylogeny inference	No	Yes
Mapping	blast	blast
		diamond
		any user defined tool
Trimming	No	gappy regions
		not variant regions
		too variant regions
		any user defined tool
MSAs subsampling	PhyloPhlAn	PhyloPhlAn
		onethousand
		sevenhundred
		fivehundred
		threehundred
		onehundred
		fifty
		twentyfive
		tenpercent
		twentyfivepercent
		fiftypercent
MSA scoring	MUSCLE	MUSCLE
		trident
		random
Substitution matrix	VTML240	MIQS
		PFASUM60
		VtML240
		VTML200
Output	phylogeny	phylogeny
		MSA
		mutation rates
MSA QC	No	fragmentary removal
		retained only if XXX inputs mapped
Input QC	discarded if low number of input proteins (shorter that threshold)	discarded if low number of input proteins (shorter that threshold)
		discarded if less than threshold markers mapped
Preset parameters for typical tasks	No	Yes
