# Supplementary material for: Integrating taxonomic, functional, and strain-level profiling of diverse microbial communities with bioBakery 3
Source: eLife. 2021 May 4;10:e65088. doi: 10.7554/eLife.65088 (PMC8096432; doi:10.7554/eLife.65088)
Supplement: Supplementary file 3. [file elife-65088-supp3.xlsx]

## Sheet: Sheet1
dataset	tool	mean_bray_curtis	mean_bray_curtis_asin_sqrt	rank_bray_curtis	rank_bray_curtis_asin_sqrt
Airways	Bracken_208_25_refseq	0.0994086	0.166883	4	4
Airways	MetaPhlAn v3.0 stat_q 0.1	0.0717259	0.100675	3	2
Airways	MetaPhlAn v3.0 stat_q 0.2	0.0688496	0.0956801	2	1
Airways	MetaPhlAn2 v2.7	0.107504	0.177593	5	5
Airways	mOTUs251_precision	0.388765	0.296987	7	7
Airways	mOTUs251_recall	0.256027	0.237141	6	6
Airways	Normalized Bracken	0.0259852	0.115232	1	3
Gastrointestinal tract	Bracken_208_25_refseq	0.116029	0.132618	2	4
Gastrointestinal tract	MetaPhlAn v3.0 stat_q 0.1	0.1279	0.102141	3	3
Gastrointestinal tract	MetaPhlAn v3.0 stat_q 0.2	0.128669	0.0986959	4	2
Gastrointestinal tract	MetaPhlAn2 v2.7	0.268105	0.24005	6	6
Gastrointestinal tract	mOTUs251_precision	0.343678	0.256967	7	7
Gastrointestinal tract	mOTUs251_recall	0.226741	0.197452	5	5
Gastrointestinal tract	Normalized Bracken	0.0257895	0.0774666	1	1
Mouse gut	Bracken_208_25_refseq	0.644044	0.688851	7	7
Mouse gut	MetaPhlAn v3.0 stat_q 0.1	0.326387	0.295443	2	2
Mouse gut	MetaPhlAn v3.0 stat_q 0.2	0.33254	0.29775	3	3
Mouse gut	MetaPhlAn2 v2.7	0.443228	0.439607	5	5
Mouse gut	mOTUs251_precision	0.425105	0.331141	4	4
Mouse gut	mOTUs251_recall	0.308523	0.244843	1	1
Mouse gut	Normalized Bracken	0.508243	0.576975	6	6
Non-human	Bracken_208_25_refseq	0.685305	0.805593	7	7
Non-human	MetaPhlAn v3.0 stat_q 0.1	0.0819284	0.0952394	2	2
Non-human	MetaPhlAn v3.0 stat_q 0.2	0.0764569	0.0840722	1	1
Non-human	MetaPhlAn2 v2.7	0.610629	0.568477	6	6
Non-human	mOTUs251_precision	0.393175	0.355341	4	5
Non-human	mOTUs251_recall	0.31301	0.352586	3	4
Non-human	Normalized Bracken	0.484089	0.303421	5	3
Oral	Bracken_208_25_refseq	0.078977	0.109132	2	4
Oral	MetaPhlAn v3.0 stat_q 0.1	0.0900684	0.101388	4	3
Oral	MetaPhlAn v3.0 stat_q 0.2	0.0897775	0.0969069	3	2
Oral	MetaPhlAn2 v2.7	0.210961	0.257812	7	7
Oral	mOTUs251_precision	0.203649	0.198781	6	6
Oral	mOTUs251_recall	0.119343	0.149896	5	5
Oral	Normalized Bracken	0.0121402	0.0626592	1	1
Skin	Bracken_208_25_refseq	0.0697956	0.140712	2	4
Skin	MetaPhlAn v3.0 stat_q 0.1	0.0731835	0.103929	4	3
Skin	MetaPhlAn v3.0 stat_q 0.2	0.0721483	0.0990366	3	2
Skin	MetaPhlAn2 v2.7	0.101062	0.176359	6	7
Skin	mOTUs251_precision	0.129348	0.174568	7	6
Skin	mOTUs251_recall	0.0905003	0.158691	5	5
Skin	Normalized Bracken	0.0159803	0.0976234	1	1
Urogenital tract	Bracken_208_25_refseq	0.130445	0.158076	2	4
Urogenital tract	MetaPhlAn v3.0 stat_q 0.1	0.140427	0.116617	3	3
Urogenital tract	MetaPhlAn v3.0 stat_q 0.2	0.142098	0.115792	4	2
Urogenital tract	MetaPhlAn2 v2.7	0.245474	0.257563	6	7
Urogenital tract	mOTUs251_precision	0.274568	0.234506	7	6
Urogenital tract	mOTUs251_recall	0.181729	0.176695	5	5
Urogenital tract	Normalized Bracken	0.0154012	0.0881423	1	1
