# Supplementary material for: Integrating taxonomic, functional, and strain-level profiling of diverse microbial communities with bioBakery 3
Source: eLife. 2021 May 4;10:e65088. doi: 10.7554/eLife.65088 (PMC8096432; doi:10.7554/eLife.65088)
Supplement: Supplementary file 6. [file elife-65088-supp6.xlsx]

## Sheet: meta_analysis_metaphlan3
Species	Number_Samples	I^2	P-value Fit	Pvalue	Standard Error	Coefficient	Confidence Interval Lower Limit	Confidence Interval Upper Limit	ZellerG_2014	FengQ_2015	YuJ_2015	ThomasAM_2019_a	ThomasAM_2019_b	VogtmannE_2016	WirbelJ_2019	YachidaS_2019	GuptaA_2019	PvalueAdjusted
s__Parvimonas_micra	1262	0	0.640742	3.0299e-31	0.678292	0.678292	0.563945	0.792638	0.0204831	8.01221568361206e-06	7.20454883612565e-10	0.0338301514579238	0.000145585494049525	0.0110060891747755	9.29086914196354e-12	9.32437760445108e-19	0.00066167391062909	1.75128e-28
s__Gemella_morbillorum	1262	0	0.75165	1.72902e-29	0.656493	0.656493	0.542381	0.770605	0.0946999	0.000173949021106288	2.25612142379554e-08	0.0903579278848267	0.000178050732931585	0.00403228921004743	1.50920850835629e-08	1.09433872707414e-18	0.021577191872833	4.99687e-27
s__Fusobacterium_nucleatum	1262	0	0.676987	2.68861e-27	0.628945	0.628945	0.515044	0.742845	7.53643e-08	6.84908060536067e-08	2.53256583369434e-07	0.110244420486825	0.00517019355281605	2.89618913683165e-05	8.41447948650328e-10	1.80738925846926e-12	0.021577191872833	5.18006e-25
s__Peptostreptococcus_stomatis	1262	0	0.951138	2.04907e-25	0.603899	0.603899	0.490288	0.717511	5.00521e-05	0.000941551925541633	4.15500701529474e-09	0.946043891150405	0.000180833738783246	0.00927927526995928	4.03146701745275e-09	2.7410351314846e-18	0.00558431205717215	2.96091e-23
s__Dialister_pneumosintes	1262	9.33837	0.528945	1.49727e-19	0.575307	0.575307	0.450643	0.699971	4.02587e-07	0.00011128735595254	0.000132382366568219	0.850574118920262	0.0174783721696394	0.000506865914936157	1.6949144071099e-07	5.98882976869933e-12	0.00558431205717215	1.44237e-17
s__Solobacterium_moorei	1262	0	0.990405	9.95947e-20	0.523905	0.523905	0.410934	0.636876	0.220395	0.00442523634569686	5.19898374265299e-06	0.0614948968325454	0.00439988161757753	0.043373925950415	3.77783248836476e-13	1.36019258316738e-10	0.0419261675968508	1.15131e-17
s__Clostridium_symbiosum	1262	50.9972	0.0211151	4.86673e-08	0.499532	0.499532	0.320089	0.678976	0.00314102	0.00275133042423599	1.31397383344215e-06	0.014568107706111	0.141937986351708	0.00409501932848871	1.14952009765135e-06	0.028445117825484	0.00224170445233223	1.65469e-06
s__Ruthenibacterium_lactatiformans	1262	17.9729	0.0916886	2.30333e-12	0.479179	0.479179	0.345294	0.613064	0.00758037	0.852730562029299	0.00249845572096228	0.774346539730106	0.0180610583005353	0.496900921433859	0.000130809921831259	8.11376188133386e-06	1.86838441787189e-06	1.66416e-10
s__Bulleidia_extructa	1262	0	0.868908	8.28842e-17	0.478853	0.478853	0.366143	0.591562	0.0311775	0.0519990615790937	0.000499239798526295	0.946043891150405	0.0226985906791882	0.0006034503013217	9.19404912108488e-06	0.000323504346137228	0.333710695743566	6.84386e-15
s__Butyricimonas_virosa	1262	57.182	0.0187035	1.60035e-05	0.42133	0.42133	0.229926	0.612733	0.102519	8.72894317185893e-05	0.111208435142223	0.178265957884176	0.231403672503329	0.947236595881907	0.0432597727868405	0.0624498308230818	0.000149044946854733	0.00023125
s__Fretibacterium_fastidiosum	1262	59.4409	0.017797	7.01611e-05	0.397917	0.397917	0.201752	0.594083	0.0347457	0.00215043819525023	0.142378594368022	0.62449074823226	0.00475899730023301	0.935032893135508	2.91913681915051e-07	0.0169363102829668	0.237961344512385	0.000750984
s__Porphyromonas_asaccharolytica	1262	6.79503	0.577909	6.14353e-10	0.379661	0.379661	0.259383	0.499938	0.000848423	3.94213002864509e-08	0.00188024154391909	0.0338301514579238	0.199563174032434	0.000746827815876631	1.02035543574576e-07	0.00138202428859344	0.0815229720841182	3.55096e-08
s__Hungatella_hathewayi	1262	68.7078	0.00107138	0.00133034	0.364344	0.364344	0.141838	0.586851	0.00601131	0.00661866566515164	4.89431648832897e-05	0.142090014066198	0.911056466002177	0.141361409542182	2.55862457664112e-08	0.00906376399715082	0.000145516621277387	0.00844984
s__Odoribacter_splanchnicus	1262	62.3355	0.018	0.000582676	0.356853	0.356853	0.153507	0.560199	0.577602	0.00937932191117169	0.685586292086662	0.0604186672898049	0.00853264089559445	0.932564945492927	0.125679177807346	0.00390589470011741	0.000303840632195683	0.00436075
s__Prevotella_intermedia	1262	0	0.979425	4.847e-10	0.355498	0.355498	0.24355	0.467446	0.00178501	0.00176524972406707	0.000870239938488508	0.382733088885226	0.057206909967281	0.0434317101015428	0.142507979464399	5.75754872626938e-07	0.0419261675968508	3.11285e-08
s__Gemella_bergeri	1202	0	0.96288	1.45984e-09	0.354084	0.354084	0.239351	0.468818	0.129317	0.150989958140526	0.00590420642819248	0.20080235530146	0.0373880162798713	0.174090812483351	0.000166031961853587	0.000439921848891485	NA	7.67078e-08
s__Eisenbergiella_tayi	1262	10.4782	0.351181	6.73224e-08	0.342491	0.342491	0.21814	0.466842	0.049911	0.0111607123144834	0.0866976902690808	0.0383507451508652	0.903130119869605	0.0510299634699729	6.54874281123888e-05	0.00128749346395469	0.00278800630081608	2.1618e-06
s__Bacteroides_fragilis	1262	35.1692	0.185378	1.32285e-05	0.340824	0.340824	0.187482	0.494166	0.0181703	0.0389091466346002	0.00167448130789477	0.353802718062531	0.037124679630086	0.0407736895558515	0.0680892244169256	0.173505629688658	0.00015031673004546	0.000196054
s__Intestinimonas_butyriciproducens	1262	52.2528	0.0240676	0.000219926	0.340147	0.340147	0.159718	0.520576	0.0219374	0.000442887576853337	0.571434054556728	0.0551947652516568	0.119635012432207	0.994806519768243	0.0284686264586508	0.843698243079001	0.00129701018862667	0.00186937
s__Selenomonas_sputigena	1202	0	0.989678	9.19551e-09	0.335969	0.335969	0.221349	0.45059	0.0149442	0.0452415681214509	0.144765564652048	0.642882124605385	0.367053313162153	0.159309393367584	0.0706043414452477	5.87861378368648e-07	NA	4.08847e-07
s__Bacteroides_nordii	1262	31.9687	0.109413	1.18523e-05	0.333674	0.333674	0.184371	0.482976	0.335532	0.00479920009518421	0.361555841254791	1	0.232469056008509	0.180275334452861	0.00444574532168624	2.31681498898559e-05	0.00981995493289252	0.000180279
s__Peptostreptococcus_anaerobius	1262	0.0099488	0.656623	6.16441e-09	0.331949	0.331949	0.220012	0.443887	0.304742	0.0267833958968005	0.00754750382622916	0.294893983818087	0.057206909967281	0.0473371352886075	0.0727544821352107	3.68305989794124e-05	0.0815229720841182	2.96919e-07
s__Porphyromonas_uenonis	1262	1.12496	0.704079	1.96803e-08	0.324492	0.324492	0.211221	0.437764	0.0299394	1.89759947893472e-06	0.461348187699087	0.680226786761938	0.0316900308943305	0.00350457189316918	1.03238272799149e-05	1.1378467632314e-05	0.021577191872833	8.12514e-07
s__Slackia_exigua	1202	0	0.999851	3.85134e-08	0.321263	0.321263	0.206728	0.435799	0.198358	0.361072435326034	0.0816771342435055	0.391321112028866	0.110978213297642	0.0822667000855503	0.00528944454309267	3.9712556124053e-05	NA	1.3913e-06
s__Flavonifractor_plautii	1262	72.679	0.00249882	0.00808714	0.320931	0.320931	0.083425	0.558437	0.00274458	0.00191819539475555	0.191501147419176	0.540490515739168	0.289263877264535	0.105490350603016	0.0707953102322202	0.0974888639064991	2.74405061710041e-06	0.0381953
s__Gemella_haemolysans	1262	21.0999	0.309213	4.53082e-06	0.318473	0.318473	0.182347	0.4546	0.684375	0.830086773659316	0.00597944508145188	0.0338301514579238	0.455601180979303	0.0219160089102559	0.000152796984431522	4.46732985987115e-05	0.0419261675968508	7.42244e-05
s__Streptococcus_anginosus_group	1262	0	0.814901	2.45231e-08	0.318181	0.318181	0.206353	0.430009	0.147315	0.934840291023847	0.00606198323590732	0.485785279793003	0.0164392300956133	0.103986630107325	4.51803785276673e-07	3.70811141526022e-05	0.0419261675968508	9.44956e-07
s__Anaerococcus_vaginalis	1202	36.0583	0.199764	0.000113653	0.311509	0.311509	0.153313	0.469704	0.115387	1.0874587921379e-05	0.490120826882445	0.382733088885226	0.103502322708967	0.031115459987696	0.00268305175764821	0.0449135228193449	NA	0.00107691
s__Fusobacterium_sp_oral_taxon_370	1202	0	0.984928	1.07749e-07	0.310419	0.310419	0.195909	0.424929	0.00190236	0.0452415681214509	0.000821531121350514	0.950241615743525	0.367053313162153	0.0881287890019973	0.00487471886248405	0.000124484101463617	NA	3.27784e-06
s__Eikenella_corrodens	1262	0	0.941401	1.80911e-07	0.297392	0.297392	0.185686	0.409098	0.00737563	0.00397350150309791	0.00938885587534431	0.0614948968325454	0.190122358664165	0.159309393367584	0.0094637913613299	0.00954344518588505	0.333710695743566	5.22834e-06
s__Bacteroides_thetaiotaomicron	1262	50.1982	0.0321086	0.00108318	0.294285	0.294285	0.117788	0.470782	0.0444147	0.36496028084682	0.782745443811875	0.20871230851772	0.358387037122098	0.708524718874354	0.0340918409007849	0.059911805821068	1.30441466437072e-05	0.00719631
s__Anaerotruncus_colihominis	1262	0	0.76656	2.82406e-07	0.292721	0.292721	0.180989	0.404453	0.174879	0.320612109202186	0.00787919294645725	0.0456790517173979	0.510962464187555	0.0754956414159807	0.210075161392454	0.000598801494837931	0.333710695743566	7.49573e-06
s__Campylobacter_ureolyticus	1262	0	0.835227	2.85305e-07	0.292573	0.292573	0.180856	0.40429	0.120399	0.0200018235014676	0.667727895536153	0.382733088885226	0.367053313162153	0.00659348587925215	0.000652964850687508	0.0053489705463751	0.160802121440221	7.49573e-06
s__Gemella_asaccharolytica	1202	0	0.802986	6.52616e-07	0.290613	0.290613	0.176122	0.405105	0.316573	0.00151703538781842	0.209556959317806	0.20080235530146	0.0316900308943305	0.0262068207219485	0.077113452618434	0.185809529031787	NA	1.57172e-05
s__Mogibacterium_diversum	1262	0	0.610097	3.45739e-07	0.290612	0.290612	0.178854	0.402369	0.988563	0.438986203803756	0.0318700266880876	0.20080235530146	0.00886267708985344	0.152776608185629	0.0356700751350897	0.00547771488515516	0.333710695743566	8.68857e-06
s__Alloprevotella_tannerae	1077	0	0.98078	2.56369e-06	0.290229	0.290229	0.169277	0.411182	0.130685	0.0452415681214509	0.144765564652048	0.744064669229653	0.367053313162153	0.0822667000855503	NA	7.902757045232e-08	NA	4.93938e-05
s__Streptococcus_oralis	1262	22.7963	0.411743	5.52428e-05	0.283489	0.283489	0.145693	0.421285	0.928796	0.459358591964531	0.0369931013547607	0.67201937381672	0.896427153364181	0.377476630817771	0.000808434114278355	0.0276535981642047	0.0419261675968508	0.00065725
s__Clostridium_citroniae	1262	51.4688	0.0273181	0.00186505	0.283354	0.283354	0.104833	0.461874	0.33721	0.0957757900497342	0.0176701859648082	0.762668369465425	0.564941916953615	0.193003049916957	0.00651873163643851	0.436778470667667	0.00278800630081608	0.0111134
s__Methanobrevibacter_smithii	1262	0.0152667	0.168313	9.74248e-07	0.279487	0.279487	0.167621	0.391354	0.519795	0.000227455552348024	0.149914114930279	0.20080235530146	0.00131625253578601	0.540142740286221	0.637103211982354	0.0746203364265924	0.000549508916126467	2.25246e-05
s__Ruminococcaceae_bacterium_D5	1262	28.9294	0.118662	0.000182752	0.27736	0.27736	0.132076	0.422644	0.137663	0.0194319901119626	0.108825565457522	0.755543532488257	0.0081362804064744	0.324195285617161	0.314591301262929	0.385605143862623	0.00066167391062909	0.00162509
s__Aggregatibacter_segnis	1202	0	0.961648	2.07313e-06	0.276981	0.276981	0.1626	0.391363	0.0940954	0.10463176917841	0.0436256250223123	0.642882124605385	0.190122358664165	1	0.273954390022468	0.000922636224540114	NA	4.53948e-05
s__Akkermansia_muciniphila	1262	1.55438	0.210821	2.16827e-06	0.274835	0.274835	0.161122	0.388548	0.207574	0.191247464344416	0.114592026848471	0.678651849345368	0.368155793442761	0.498701040756524	0.208943620511837	0.0404515727769713	0.00038978787246602	4.53948e-05
s__Mogibacterium_timidum	1202	0	0.991641	2.54768e-06	0.27448	0.27448	0.160122	0.388838	0.491115	0.281076679948266	0.0219218359765155	0.20080235530146	0.66138346259432	0.0819025239785574	0.00164949313240124	0.0639269531270695	NA	4.93938e-05
s__Clostridium_bolteae	1262	70.3834	0.00224996	0.0187324	0.273386	0.273386	0.0454536	0.501318	0.199374	0.0718115233655297	0.00668933053363568	0.785965309383168	0.88934740072657	0.243967489899109	7.13333962851221e-05	0.179016078842126	0.000469485964570028	0.0731576
s__Christensenella_minuta	1262	0	0.923196	2.19905e-06	0.269571	0.269571	0.157969	0.381173	0.691784	0.514400311094318	0.394323864190192	0.813569586384706	0.109767269647987	0.0764468395823232	0.182635778931517	0.00262828747623307	0.160802121440221	4.53948e-05
s__Parabacteroides_distasonis	1262	37.759	0.060492	0.000783314	0.268606	0.268606	0.111858	0.425355	0.121585	0.00944606499810493	0.125150373973119	0.724042540294935	0.905639197911146	0.324658571056667	0.0900358077324483	0.0168709083903453	0.000932609032099333	0.00538994
s__Harryflintia_acetispora	1202	0	0.526875	4.26279e-06	0.268528	0.268528	0.154068	0.382988	0.0639626	0.452237405451931	0.993211476052293	0.399552219436681	0.0628333790493101	0.135101907046482	0.0018608143674825	0.035475379758028	NA	7.42244e-05
s__Pseudoflavonifractor_sp_An184	1202	0	0.609302	4.62297e-06	0.267481	0.267481	0.153045	0.381917	0.00523727	0.0182125268602296	0.426606550521241	0.694646810028696	0.907090662922179	0.0582213919439614	0.34171230564537	0.0687055993287851	NA	7.42244e-05
s__Escherichia_coli	1262	60.2608	0.0143615	0.00796865	0.266936	0.266936	0.0697602	0.464111	0.0340765	0.00664677003374755	0.911406422226526	0.0119105009919976	0.0355985534423084	0.00554683884507798	0.0618630492884928	0.81781892998632	0.00309316912547417	0.0380651
s__Atopobium_rimae	1202	10.9011	0.443354	4.43009e-05	0.265344	0.265344	0.137997	0.392692	0.301709	0.863169057938143	0.00104763157508133	0.93993275793362	0.0711528656152119	0.187860982479459	0.00729756358680864	0.000317958732492496	NA	0.000547769
s__Alistipes_finegoldii	1262	0	0.764205	3.75282e-06	0.263362	0.263362	0.151747	0.374978	0.163768	0.0023724368208569	0.131562638182441	0.894721217984553	0.841444701620248	0.60981012675814	0.191165200172581	0.0862300085452146	0.0530299088866185	6.84885e-05
s__Catabacter_hongkongensis	1262	0	0.956657	3.79175e-06	0.263104	0.263104	0.151546	0.374663	0.599069	0.700977883735762	0.0503841943399506	0.118734319530925	0.819286420317789	0.348019196866706	0.00923418949599729	0.000286247810784187	0.333710695743566	6.84885e-05
s__Atopobium_parvulum	1262	0	0.891737	4.44996e-06	0.261262	0.261262	0.149681	0.372843	0.68894	0.919528180747532	0.00394458350594658	0.680226786761938	0.172059276667338	0.162783257293136	0.049015825454891	0.00028075070639239	0.0419261675968508	7.42244e-05
s__Oscillibacter_sp_CAG_241	1262	41.6162	0.070645	0.00160042	0.261047	0.261047	0.0989206	0.423172	0.154838	0.00466960495221282	0.855296359938512	0.982153779381288	0.275016321051693	0.317584461553571	0.221189419184834	0.507024738925107	0.0102496794149106	0.00973732
s__Parvimonas_sp_oral_taxon_393	1156	20.8399	0.495535	0.000371591	0.255271	0.255271	0.114711	0.395832	0.00439575	0.00397350150309791	0.00414723201840853	NA	0.367053313162153	0.159309393367584	0.0358290822760981	0.169134602228441	NA	0.00290243
s__Porphyromonas_endodontalis	984	0	0.895951	7.63855e-05	0.254975	0.254975	0.128633	0.381317	0.0622651	NA	0.0571260258445896	NA	0.367053313162153	0.326706554868585	NA	0.00199753729124145	0.021577191872833	0.000802742
s__Mogibacterium_pumilum	1156	41.1592	0.0944517	0.00344443	0.249983	0.249983	0.0824769	0.41749	0.714976	0.198348179684552	0.00378038875515949	NA	0.0121405076427391	0.126397579334369	0.0207683807720166	0.00438532105642022	NA	0.0187819
s__Fusobacterium_periodonticum	1202	0	0.637237	2.07291e-05	0.248374	0.248374	0.134017	0.362731	0.0844383	0.0177383058906821	0.0594555717994217	0.382733088885226	0.961999755373719	1	0.00250522699692939	0.00139581492247455	NA	0.000292229
s__Lachnoanaerobaculum_saburreum	1142	0	0.682904	3.72677e-05	0.246832	0.246832	0.129518	0.364147	0.130685	0.0200018235014676	0.385624524831542	0.382733088885226	NA	0.319671645109629	0.0358290822760981	0.0153172431280972	NA	0.000489561
s__Prevotella_nigrescens	1134	0	0.972127	4.45418e-05	0.244733	0.244733	0.127241	0.362225	0.130685	0.257348456908861	NA	0.775133941216461	0.367053313162153	0.159309393367584	0.000166031961853587	0.00989870443429841	0.0110350863369353	0.000547769
s__Actinomyces_cardiffensis	1156	19.7457	0.515142	0.000588475	0.244172	0.244172	0.104927	0.383417	0.0844383	0.964869321889468	0.00938885587534431	NA	0.0609632918624636	0.0434317101015428	0.0094637913613299	0.144429254721747	NA	0.00436075
s__Bilophila_wadsworthia	1262	9.77883	0.483286	0.000107578	0.243074	0.243074	0.120059	0.36609	0.0102243	0.00843183356982124	0.0830995402696459	0.982386890076861	0.184574294567736	0.476202508841658	0.167416807967793	0.0356251716265913	0.0376473960849883	0.0010539
s__Eubacterium_infirmum	1202	0	0.912588	3.30275e-05	0.242048	0.242048	0.127775	0.35632	0.691847	0.689191787474266	0.0231305310732579	0.950241615743525	0.29369113620545	0.0507798994486588	0.243385942291769	0.0261417352875387	NA	0.000443951
s__Alistipes_indistinctus	1262	0	0.728729	2.24923e-05	0.241212	0.241212	0.129673	0.35275	0.94906	0.0493321289555429	0.0285751118760747	0.512959410093809	0.221322350216357	0.920355850411961	0.0970201982020754	0.000290207889693448	0.264025137080339	0.000309536
s__Fusobacterium_necrophorum	1028	0	0.992277	0.000128755	0.24104	0.24104	0.117652	0.364427	0.120399	0.0200018235014676	NA	NA	0.367053313162153	0.326706554868585	0.30544804067441	0.00126939109156186	NA	0.00118127
s__Clostridium_sp_CAG_58	1202	0	0.771023	5.73934e-05	0.234595	0.234595	0.120311	0.34888	0.0773488	0.48516961039262	0.0338867686951085	0.0315711141528773	0.089141104352243	0.640862919808211	0.549187765121497	0.460212691624681	NA	0.00065725
s__Filifactor_alocis	1109	0	0.982083	0.000122836	0.232839	0.232839	0.114008	0.351669	0.291319	NA	0.090418698223585	NA	0.367053313162153	0.159309393367584	0.0706043414452477	0.000968856616912126	0.0815229720841182	0.00114515
s__Lachnoclostridium_sp_An131	1202	0	0.448848	6.59932e-05	0.232794	0.232794	0.11845	0.347139	0.0131526	0.0801725037328474	0.278001045619886	0.391321112028866	0.407569760919385	0.653635612016752	0.00106215549175336	0.0664970794614836	NA	0.00073354
s__Bacteroides_caccae	1262	0	0.592271	4.41152e-05	0.232465	0.232465	0.120924	0.344007	0.757769	0.00811136233598149	0.0109411218210671	0.329414307177603	0.714855536136068	0.117710089559575	0.193836149949331	0.0109794964014146	1	0.000547769
s__Actinomyces_turicensis	1202	0	0.957766	6.83599e-05	0.232056	0.232056	0.117834	0.346277	0.442907	0.406824055300302	0.152891861154153	0.382733088885226	0.372983391596647	0.159309393367584	0.00516538804307621	0.00908510406247371	NA	0.00074551
s__Eubacterium_limosum	1202	7.15236	0.444729	0.000231637	0.230826	0.230826	0.107947	0.353706	0.713863	0.890825639593614	0.000522235655783387	0.900676560163781	0.485619682874008	0.333308695683085	0.0727544821352107	0.0729371157538001	NA	0.00188572
s__Cloacibacillus_evryensis	1202	0	0.645033	8.07045e-05	0.229889	0.229889	0.115597	0.344181	0.816875	0.840562690057685	0.0557381332320347	0.20080235530146	0.103502322708967	0.387830503034146	0.0021180448580725	0.583878305728619	NA	0.000818372
s__Granulicatella_adiacens	1202	0	0.876714	8.74085e-05	0.228661	0.228661	0.114424	0.342899	0.98728	0.84526365351655	0.372808836901739	0.20080235530146	0.904539627007347	0.0270699759522666	0.00321076141581779	0.0262408952700416	NA	0.00087107
s__Peptoniphilus_harei	1156	0	0.945895	0.000139289	0.226355	0.226355	0.109895	0.342816	0.672036	0.189674343778465	0.658144301878503	NA	0.961999755373719	0.163241656469076	0.0358290822760981	0.297655208600055	NA	0.00125796
s__Parvimonas_sp_oral_taxon_110	1096	0	0.81398	0.00022991	0.224864	0.224864	0.105221	0.344507	0.0303603	0.10463176917841	0.0167753291868707	NA	NA	0.326706554868585	0.520187451723909	0.0232634225122306	NA	0.00188572
s__Granulicatella_elegans	1262	0	0.566652	7.83569e-05	0.224722	0.224722	0.113199	0.336245	0.508745	0.760185509304152	0.602184846045148	0.110244420486825	0.680367445049755	0.223828527187129	0.00544313077840141	0.0026714187400964	0.160802121440221	0.000808755
s__Eubacterium_callanderi	1202	0	0.959092	0.000204968	0.216278	0.216278	0.102107	0.33045	0.790336	0.222007192251251	0.00946951025161351	0.382733088885226	0.367053313162153	0.190486218525892	0.273954390022468	0.178732778069158	NA	0.00176823
s__Clostridium_methylpentosum	1202	8.94833	0.342734	0.000722647	0.215523	0.215523	0.0905784	0.340467	0.840174	0.719619694023238	0.055340083062893	0.0611571411669794	0.544180264793306	0.325022431018083	0.000574181685089747	0.287853090354937	NA	0.00515667
s__Campylobacter_showae	1202	0	0.901449	0.000229361	0.214645	0.214645	0.100458	0.328833	0.120399	0.257348456908861	0.0231305310732579	0.382733088885226	0.367053313162153	0.310274946557178	0.142507979464399	0.411556609862541	NA	0.00188572
s__Clostridium_scindens	1262	40.7035	0.107632	0.00941488	0.212464	0.212464	0.0520928	0.372836	0.217871	0.914612584068883	0.00110419731751414	0.110244420486825	0.833752799432745	0.0206491885950581	0.00747594521161733	0.124837912530489	0.333710695743566	0.0425141
s__Fusobacterium_gonidiaformans	1202	0.00264528	0.755739	0.000268758	0.212337	0.212337	0.0981198	0.326555	0.0602112	0.0452415681214509	0.144765564652048	0.294893983818087	0.367053313162153	0.310274946557178	0.0425922369516006	0.0241817040994244	NA	0.00215753
s__Faecalicoccus_pleomorphus	1156	35.5645	0.143146	0.0101246	0.208704	0.208704	0.0496353	0.367773	0.720315	3.89365720636291e-05	0.157973998878305	NA	0.33199489400393	0.664817437217996	0.21477461894375	0.575940287112148	NA	0.0450157
s__Olsenella_profusa	1202	0	0.811572	0.00035046	0.208275	0.208275	0.0940843	0.322465	0.130169	0.483850770789569	0.471545126472605	0.259351050003995	0.513893708450657	0.364229821810334	0.0139321210767097	0.0473576310890857	NA	0.00277488
s__Cloacibacillus_porcorum	1202	20.5094	0.460665	0.0033771	0.206532	0.206532	0.0684307	0.344633	0.958988	0.840562690057685	0.0913291790283852	0.20080235530146	0.103502322708967	0.630893865788404	0.640047919469576	0.76909321609508	NA	0.0185901
s__Lachnoclostridium_sp_An138	1202	0	0.587948	0.000443966	0.204697	0.204697	0.0904755	0.318918	0.0710541	0.0400089276899502	0.0150051761122417	0.854321750842681	0.728362916547651	0.500314576943609	0.224491715681413	0.0228900361375157	NA	0.00337648
s__Actinomyces_graevenitzii	1202	27.3682	0.251233	0.00670102	0.202503	0.202503	0.0561186	0.348886	0.577937	0.456520547156785	0.307615851833474	0.642882124605385	0.0834238894752226	0.0418589344944893	0.0254924886630455	0.428824587997863	NA	0.0336415
s__Prevotella_oris	1142	0	0.999389	0.000781904	0.200638	0.200638	0.0835707	0.317705	0.0622651	0.257348456908861	0.409500109565937	0.713406539716544	NA	0.159309393367584	0.30544804067441	0.0121834806252482	NA	0.00538994
s__Mageeibacillus_indolicus	1156	44.3782	0.103262	0.0227342	0.200218	0.200218	0.0279432	0.372494	0.590532	0.0261993780730022	0.824720738902801	NA	0.213465978069152	0.0819277091422427	0.00544287584439856	0.759072581486773	NA	0.0844535
s__Veillonella_parvula	1262	65.8831	0.00427926	0.0660339	0.199048	0.199048	-0.0131859	0.411282	0.626212	0.153191845307001	0.807775780668604	0.242311719196263	0.232971078729914	0.538257747826026	0.14465628547	0.701841474994604	0.000984208393561155	0.18262
s__Prevotella_sp_CAG_520	1262	0.0027707	0.402502	0.000661071	0.193686	0.193686	0.0822056	0.305167	0.929307	0.809181680624383	0.448531197772035	0.0338301514579238	0.117500680300692	0.667432067531832	0.813717220896327	0.00356901103735336	0.00722971978077355	0.0048367
s__Butyricimonas_synergistica	1262	0	0.888918	0.000748974	0.191518	0.191518	0.0801655	0.30287	0.242358	0.00357827595168925	0.0283428468196253	0.375537156736185	0.60132156712754	0.548564285256615	0.430551625668507	0.00329391266282607	0.00539672580035582	0.00527935
s__Campylobacter_gracilis	1202	46.8002	0.050794	0.0313628	0.190953	0.190953	0.0170753	0.36483	0.0303603	0.18329113017459	0.500268441530194	0.946043891150405	NA	0.0434317101015428	0.0358290822760981	0.953357623292819	0.333710695743566	0.107903
s__Campylobacter_rectus	1156	0	0.999481	0.0013637	0.190033	0.190033	0.0737207	0.306344	0.291319	0.257348456908861	0.409500109565937	NA	0.367053313162153	0.326706554868585	0.142507979464399	0.0496905023121929	NA	0.00856758
s__Streptococcus_milleri	1262	0	0.93464	0.000826633	0.189944	0.189944	0.0786061	0.301283	0.167266	0.267687365892904	0.203810559616353	0.950241615743525	0.362181678046269	0.719385493171132	0.336029243082509	0.331555220242244	0.333710695743566	0.0056211
s__Clostridium_aldenense	1262	67.5945	0.00246002	0.0868511	0.189928	0.189928	-0.0274775	0.407333	0.111377	0.90879906794521	0.00628318999298768	0.909058161341448	0.118951468039037	0.0549800997161012	3.47958553954697e-05	0.582883745462261	0.333710695743566	0.221731
s__Actinomyces_viscosus	1156	0	0.948935	0.00139787	0.189661	0.189661	0.0733173	0.306005	0.973347	0.682996950702989	0.140681652413228	NA	0.818395828716576	0.733092367087474	0.131721423757413	0.0176567623888642	NA	0.00868786
s__Fusobacterium_naviforme	1216	0	0.880452	0.00111869	0.188607	0.188607	0.0751729	0.30204	0.291319	6.34707797936101e-05	0.237107019143383	NA	0.190122358664165	0.326706554868585	0.273954390022468	0.259177902580758	0.333710695743566	0.00734774
s__Sutterella_parvirubra	1262	0	0.518349	0.000924722	0.18832	0.18832	0.0768929	0.299747	0.689699	0.115369126867177	0.482038104294409	0.766216419731937	0.649025557634668	0.343790662621747	0.416799712559402	0.000466935909735092	0.112075891058025	0.00621499
s__Ruminococcaceae_bacterium_D16	1202	52.9678	0.0345225	0.0484651	0.186772	0.186772	0.0012592	0.372285	0.191249	1.62688997646199e-05	0.229261490259995	0.428342469450072	0.678689048811137	0.834599765227	0.385997864073742	0.0762263126219549	NA	0.147436
s__Clostridium_sp_D5	1156	39.8179	0.152703	0.0269328	0.18614	0.18614	0.0212454	0.351035	0.792555	0.614647866021408	0.552200355072833	NA	0.625671948101066	0.737683767481607	0.0012823608917131	0.81394664058764	NA	0.0966906
s__Streptococcus_gallolyticus	1262	4.29747	0.463698	0.00179225	0.185752	0.185752	0.0691633	0.302341	0.362371	0.10463176917841	0.504845464160749	0.382733088885226	0.110978213297642	0.00659348587925215	0.139582047299575	0.194504336531425	0.0832283486620763	0.0107908
s__Morganella_morganii	1262	3.07951	0.624269	0.0015795	0.185588	0.185588	0.0704662	0.300709	0.0149442	0.257348456908861	0.200123028428357	0.0451788192415684	0.057206909967281	0.582777617292422	0.0706043414452477	0.129773484968553	0.0199601395011567	0.00971225
s__Clostridium_leptum	1262	0.00322175	0.225698	0.00117275	0.18464	0.18464	0.0731331	0.296147	0.191124	0.109673105401041	0.710032823994882	0.311513475572135	0.184275020096373	0.0643658984655234	0.393564515784332	0.0310186184145267	0.333710695743566	0.00761631
s__Clostridium_bolteae_CAG_59	1262	0.00128207	0.335456	0.00123231	0.18376	0.18376	0.072299	0.29522	0.0941692	0.0292660625734132	0.738670434587935	0.089894882934415	0.418182002793893	0.89178932301082	0.00751020691674364	0.25756258544703	0.333710695743566	0.00791414
s__Treponema_socranskii	1049	0	0.934809	0.00317943	0.183722	0.183722	0.0616513	0.305793	0.0303603	NA	0.409500109565937	NA	0.367053313162153	0.326706554868585	0.30544804067441	0.10959749056521	NA	0.0176703
s__Clostridium_hylemonae	1156	0	0.690765	0.00198946	0.183582	0.183582	0.067205	0.299958	0.113228	0.0868863414493623	0.677365980643527	NA	NA	0.196075192629911	0.0191197818790907	0.0635923514586671	0.333710695743566	0.0117337
s__Clostridium_clostridioforme	1262	55.2593	0.00584585	0.0520774	0.183533	0.183533	-0.0016507	0.368716	0.442205	0.250874055508045	0.000178757454665169	0.873812469426426	0.833752799432745	0.0859833773950537	8.49709074351396e-06	0.0927352876198187	0.333710695743566	0.154964
s__Peptostreptococcus_sp_MV1	624	0	0.764444	0.0244973	0.18168	0.18168	0.0233659	0.339994	0.291319	0.00891224422716855	0.781866796271056	0.382733088885226	NA	0.552394771173143	0.972793417410595	NA	NA	0.0896167
s__Parabacteroides_merdae	1262	36.6761	0.113956	0.0227937	0.179695	0.179695	0.0250111	0.334378	0.0445205	0.000451087147693793	0.556220355918764	0.769604326175563	0.563906551391701	0.752512829004668	0.919189119376125	0.052969343547187	0.0306962716349303	0.0844535
s__Actinomyces_sp_oral_taxon_181	1262	9.77268	0.423003	0.00420321	0.179362	0.179362	0.0565518	0.302172	0.088745	0.624032726443563	0.251314111729224	0.858490688566389	0.987267890549433	0.176669840823063	0.0117367313566876	0.915390171872741	0.160802121440221	0.0222886
s__Holdemania_filiformis	1202	46.2363	0.0681634	0.0424068	0.179199	0.179199	0.00614034	0.352257	0.613596	0.00615269076214139	0.761887057693861	0.0383507451508652	0.243487077495367	0.238935211781316	0.589556206711918	8.26043828340978e-05	NA	0.13394
s__Clostridium_lavalense	1262	41.8436	0.0957401	0.0305263	0.178566	0.178566	0.016776	0.340356	0.111495	0.00652321406746046	0.0558173233464257	0.436789525894124	0.138608054681462	0.538367524394182	0.000160768717198986	0.940126446142853	0.333710695743566	0.105849
s__Parvimonas_sp_KA00067	1216	0.00516293	0.419357	0.00208092	0.178288	0.178288	0.0647764	0.2918	0.542901	0.000290250605294685	0.090418698223585	NA	0.057206909967281	0.0123591888514422	0.281125736216025	0.10959749056521	0.333710695743566	0.0121492
s__Alistipes_shahii	1262	37.0448	0.130223	0.0275617	0.174171	0.174171	0.0192476	0.329094	0.771851	0.0591236865042599	0.862678411991615	0.509331363812449	0.330970413467808	0.50492239907384	0.498160056994551	4.71674631342933e-05	0.0145828309118635	0.0983373
s__Eubacterium_saphenum	1156	0	0.798279	0.00350645	0.173295	0.173295	0.0569541	0.289636	0.391461	0.484644883365599	0.237107019143383	NA	0.057206909967281	0.159309393367584	0.142507979464399	0.0805186593659146	NA	0.0189414
s__Lawsonibacter_asaccharolyticus	1262	49.5463	0.0559807	0.0521053	0.172758	0.172758	-0.00157448	0.347091	0.12262	0.000705080299315786	0.586267306368179	0.894552947462604	0.132584986738346	0.505132702236953	0.541631454965199	0.537259691562813	0.305045552005832	0.154964
s__Eggerthia_catenaformis	1156	0	0.965924	0.00364126	0.172524	0.172524	0.0562315	0.288817	0.130685	0.758035332074205	0.942555325113781	NA	0.367053313162153	0.582777617292422	0.30544804067441	0.0498078433846362	NA	0.0194875
s__Butyribacterium_methylotrophicum	1202	0.00116663	0.275374	0.00314286	0.172106	0.172106	0.0578918	0.286321	0.339205	0.752063883872474	0.0995566191083252	0.382733088885226	0.300371377863526	0.163241656469076	0.139582047299575	0.00240414018815981	NA	0.0176366
s__Firmicutes_bacterium_CAG_145	1262	0.00425409	0.221705	0.00256352	0.171528	0.171528	0.06005	0.283006	0.309574	0.515510670490636	0.546088087781262	0.00653793625771311	0.296504676751464	0.969379801736411	0.214453376937607	0.196877233390801	0.333710695743566	0.0146704
s__Bacteroides_cellulosilyticus	1262	35.1879	0.189893	0.0278935	0.170911	0.170911	0.0185632	0.323258	0.329266	0.1940976487189	0.0324417850201656	0.218650128121027	0.6093804458398	0.832589063836391	0.330918832725862	0.00217858491400685	0.694562915086129	0.0989107
s__Megasphaera_micronuciformis	1262	26.6593	0.236743	0.0189249	0.169932	0.169932	0.0280233	0.31184	0.00737563	0.00397350150309791	0.35458170555425	0.391321112028866	0.300371377863526	0.152314384599769	0.281125736216025	0.0758827993612421	0.0815229720841182	0.0732064
s__Coprococcus_catus	1262	0.00122008	0.252684	0.00307873	0.168312	0.168312	0.0568554	0.279769	0.687388	0.982340797196805	0.62398637320447	0.753360440499737	0.150671328346526	0.710369035143821	0.531662579554984	0.0636858203074286	0.00112953769371273	0.0174462
s__Fusobacterium_mortiferum	1262	20.7681	0.357552	0.0148381	0.167885	0.167885	0.0328247	0.302946	0.124271	0.0452415681214509	0.0102539620444024	0.0185314666992243	0.367053313162153	0.567488824907502	0.30544804067441	0.0131992507433872	0.544026705656552	0.0612602
s__Streptococcus_mitis	1262	14.2756	0.278354	0.0108412	0.166154	0.166154	0.0383343	0.293974	0.0493422	0.857054489347822	0.125932867644973	0.126445705135247	0.908925796092083	0.207174304424559	0.0296301527158422	0.00882628890441365	0.0815229720841182	0.0464166
s__Tyzzerella_nexilis	1216	20.4089	0.198197	0.0172394	0.166088	0.166088	0.0294019	0.302775	0.209157	0.00367488260695347	0.384990185926166	NA	0.578902863488219	0.929813986670234	0.00173592972629238	0.342353199085581	0.021577191872833	0.0691971
s__Ruminococcus_gnavus	1262	52.0164	0.0327494	0.0702764	0.165317	0.165317	-0.0136847	0.344319	0.931327	0.58179103716669	0.0454256445375205	0.864607152137122	0.676767602457187	0.0175969233561502	0.046457524565339	0.755052467881056	0.00697220725013881	0.188054
s__Streptococcus_pasteurianus	1262	37.5591	0.110722	0.0382439	0.164778	0.164778	0.00892714	0.320628	0.129327	0.222292708513491	0.0622292958320847	0.20080235530146	0.450720449425489	0.567488824907502	0.151662535040316	0.0422988130863914	0.0110350863369353	0.122805
s__Clostridium_sp_CAG_242	1202	14.0273	0.242445	0.0137583	0.164207	0.164207	0.0335643	0.29485	0.317216	0.0557594411090149	0.45259970615381	0.0611571411669794	0.560660517462283	0.639253988638484	0.00917164596522099	0.529615303254771	NA	0.0576255
s__Actinomyces_sp_HPA0247	1262	25.5464	0.246961	0.0223411	0.163858	0.163858	0.0232789	0.304438	0.726836	0.083283241252636	0.0585767222331946	0.880205467622124	0.113857318568956	0.00736565920203357	0.127173942205919	0.590319087422073	0.160802121440221	0.0838515
s__Firmicutes_bacterium_CAG_238	1262	48.5012	0.0442724	0.0657949	0.162069	0.162069	-0.0105836	0.334723	0.877215	0.276992133275753	0.669806100342347	0.950241615743525	0.0628247069765047	0.0689690916998523	0.628322853698355	0.142508621393031	0.00451740067541797	0.18262
s__Enterobacter_cloacae_complex	1262	0	0.637906	0.00449731	0.16139	0.16139	0.0500492	0.272731	0.411023	0.976575341598477	0.120750044102421	0.382733088885226	0.0316900308943305	0.177892498723733	0.188649127038046	0.531850857299957	0.991816356428252	0.0236313
s__Streptococcus_pneumoniae	1156	41.3897	0.122342	0.0593981	0.16086	0.16086	-0.0063763	0.328096	0.79781	0.0773310465252345	0.144765564652048	NA	0.961999755373719	0.51747578159868	0.0094637913613299	0.88446745437172	NA	0.169961
s__Dorea_formicigenerans	1262	38.053	0.114654	0.0456747	0.159519	0.159519	0.00306711	0.315971	0.0312955	0.842790032577337	0.0136498841058324	0.473746902183104	0.439425826902691	0.757330862755073	0.238560019296808	0.0482103869830083	0.0171450949749133	0.141935
s__Acidaminococcus_intestini	1262	51.2459	0.0137755	0.0796033	0.158476	0.158476	-0.0187109	0.335663	0.246209	0.00367488260695347	0.0358528972462899	0.989199810689235	0.289057588397068	0.88225802464976	0.421645983495354	0.11001142227966	0.909562477109405	0.207397
s__Anaerotignum_lactatifermentans	1202	0.00819786	0.182408	0.00667641	0.158089	0.158089	0.043862	0.272317	0.022347	0.186787604256378	0.0595670008498604	0.27052488624836	0.0603236021194424	0.433259283857096	0.00683149952922291	0.0292448718027618	NA	0.0336415
s__Atopobium_minutum	1074	21.5023	0.457809	0.0375027	0.158027	0.158027	0.00913746	0.306916	0.848635	0.196219874689956	NA	0.382733088885226	0.354880461362187	0.159309393367584	0.0105504040664386	0.756829115838633	NA	0.121191
s__Proteus_mirabilis	1030	28.9037	0.357975	0.0616037	0.157108	0.157108	-0.00763434	0.32185	0.291319	NA	0.0571260258445896	0.382733088885226	0.367053313162153	0.310274946557178	NA	0.861333472196592	0.0815229720841182	0.174544
s__Eisenbergiella_massiliensis	1262	41.7369	0.0757171	0.0592668	0.155664	0.155664	-0.00608683	0.317415	0.335914	0.0858813385266124	0.00653348623467911	0.33069233171975	0.299336359725054	0.194493556559309	0.116207927196661	0.158734154105715	0.333710695743566	0.169961
s__Bacteroides_salyersiae	1262	0.948928	0.601179	0.00675159	0.155481	0.155481	0.0429844	0.267978	0.206675	0.0204556202911347	0.605694699208913	0.0303840032535121	0.459533232604522	0.424219156970186	0.434235981153608	0.287297243826578	0.0398571427089918	0.0336415
s__Eubacterium_brachy	1202	0	0.655849	0.00768415	0.155155	0.155155	0.0410742	0.269235	0.031061	0.443553217034958	0.327088059290864	0.382733088885226	0.51416592807919	0.398316391313845	0.0740374404063093	0.0646733276613584	NA	0.0371972
s__Fusobacterium_equinum	1156	0	0.936014	0.00938572	0.154088	0.154088	0.0378276	0.270349	0.239497	0.257348456908861	0.409500109565937	NA	0.367053313162153	0.159309393367584	0.532353656910627	0.0496905023121929	NA	0.0425141
s__Firmicutes_bacterium_CAG_94	1262	0	0.910237	0.00670601	0.153899	0.153899	0.0426393	0.265159	0.673885	0.0140664317972893	0.856971404430154	1	0.390909856990265	0.501215003248781	0.0564235415457021	0.876897111660718	0.333710695743566	0.0336415
s__Lactobacillus_paragasseri	1262	0.468726	0.537483	0.00749084	0.152703	0.152703	0.0407844	0.264622	0.31906	0.630010747468517	0.159146995690045	0.950241615743525	0.247719424135366	0.357826940960025	0.111839294501026	0.530285266571296	0.042488107242142	0.0366924
s__Pyramidobacter_piscolens	1262	23.6679	0.380347	0.0305826	0.152573	0.152573	0.0142872	0.290858	0.538949	0.257348456908861	0.967288277680406	0.750838730974402	0.623855475563343	0.0822667000855503	0.281125736216025	0.0782836861753563	0.021577191872833	0.105849
s__Flavonifractor_sp_An306	1202	0	0.67985	0.00919541	0.151594	0.151594	0.0375239	0.265665	0.521062	0.18329113017459	0.767729394591155	0.259351050003995	0.909361701096296	0.73628130647442	0.018358740482582	0.0375447462264912	NA	0.0425141
s__Streptococcus_sp_NLAE_zl_C503	1156	0	0.932061	0.0110598	0.150707	0.150707	0.0344522	0.266961	0.521877	0.428650354072069	0.490120826882445	NA	0.517425235634523	0.0822667000855503	0.142507979464399	0.907584662891232	NA	0.0470042
s__Bacteroides_eggerthii	1262	62.0319	0.0130521	0.143467	0.150102	0.150102	-0.0509873	0.35119	0.854392	0.0013428771867494	0.795698240110012	0.485223155475183	0.555366102792786	0.129898176409501	0.199832830648846	0.835483242752515	0.000129519362174575	0.316503
s__Actinomyces_sp_HMSC035G02	1262	41.3523	0.108806	0.0678058	0.150008	0.150008	-0.0109793	0.310996	0.402287	0.0803557751063284	0.216164672342434	0.435849304904264	0.354019438589528	0.26958794160701	0.851997850960221	0.00111540488789276	0.160802121440221	0.186628
s__Olsenella_uli	1202	0	0.828271	0.0107585	0.148392	0.148392	0.0343559	0.262428	0.490797	0.129419611613771	0.490120826882445	0.950241615743525	0.0783448737954122	0.319671645109629	0.0242007097962692	0.464166020304692	NA	0.0464059
s__Dielma_fastidiosa	1202	6.14543	0.629161	0.0171365	0.147667	0.147667	0.0262532	0.26908	0.994597	0.0732097479689986	0.670536397908603	0.358975317733259	0.779589077785294	0.153988543625814	0.00224284009278264	0.411730974764392	NA	0.0691971
s__Streptococcus_agalactiae	1156	0	0.635258	0.0129263	0.147511	0.147511	0.0312036	0.263818	0.473326	0.202929390403277	0.0571260258445896	NA	0.904539627007347	0.159309393367584	0.972793417410595	0.040082932848575	NA	0.0545356
s__Prevotella_stercorea	1262	0	0.535532	0.00973315	0.146843	0.146843	0.0355129	0.258173	0.598897	0.189674343778465	0.0469747732441849	0.0338301514579238	0.0174783721696394	0.754061314819929	0.401999411790778	0.00232897095603052	0.0898684311610711	0.0436106
s__Blautia_sp_An249	1156	0	0.77562	0.0139553	0.145851	0.145851	0.0295716	0.26213	0.49626	0.264727125085765	0.796076638504789	NA	0.492365778806135	0.326706554868585	0.30544804067441	0.186496744486023	NA	0.05803
s__Lactobacillus_salivarius	1216	29.2997	0.255509	0.0525666	0.145345	0.145345	-0.00161203	0.292303	0.351488	0.00653843260495606	0.090798259693711	NA	0.521931576410836	0.550342702396875	0.00487471886248405	0.917696958800962	0.160524036107338	0.154964
s__Actinomyces_sp_S6_Spd3	1262	0.0182893	0.349042	0.010659	0.145131	0.145131	0.0337423	0.256519	0.56376	0.0317120540425971	0.0264938992679322	0.393902132895853	0.590670431542463	0.524322517412466	0.317224289078194	0.486635814738661	0.0815229720841182	0.0463224
s__Leptotrichia_hofstadii	1202	5.18928	0.714352	0.0189982	0.143911	0.143911	0.0236584	0.264163	0.0622651	0.257348456908861	0.0571260258445896	0.382733088885226	NA	1	0.0358290822760981	0.80430123627528	0.333710695743566	0.0732064
s__Megasphaera_stantonii	991	0	0.753561	0.0253928	0.143249	0.143249	0.017649	0.268848	0.254036	NA	0.767729394591155	0.294893983818087	0.961999755373719	NA	0.30544804067441	0.136743391752272	NA	0.0917314
s__Parabacteroides_goldsteinii	1262	65.7452	0.00955569	0.18759	0.142256	0.142256	-0.0693304	0.353842	0.0616631	0.683957011980281	0.771364931803875	0.165930658809345	0.548696171807715	0.64604843485246	0.0575217927719227	0.0189159880896732	0.000313487040949502	0.376483
s__Pyramidobacter_sp_C12_8	1262	13.5724	0.580764	0.0282728	0.142003	0.142003	0.0151175	0.268888	0.239497	0.257348456908861	0.441731683797228	0.462519068250324	0.961999755373719	0.0822667000855503	0.95467131576096	0.526994967437534	0.0815229720841182	0.0996443
s__Streptococcus_cristatus	1202	0	0.635136	0.0151781	0.141304	0.141304	0.0272433	0.255364	0.384886	0.596148201562451	0.454399301895309	0.20080235530146	0.147897519814516	0.410586510433824	0.017397288438803	0.213385453592038	NA	0.0622196
s__Prevotella_sp_AM42_24	1158	0.0120443	0.360436	0.0175381	0.140965	0.140965	0.0246452	0.257286	0.938125	0.0452415681214509	0.931388966554596	0.0611571411669794	0.354880461362187	NA	0.300413807272032	0.262597697880278	0.635852180168533	0.0699104
s__Lactobacillus_sanfranciscensis	1156	36.6234	0.152577	0.0864851	0.14007	0.14007	-0.0200782	0.300217	0.360436	0.547621832262517	0.127917413365178	NA	0.567424071057996	0.163241656469076	0.197126238863946	0.000300833622953205	NA	0.221731
s__Allisonella_histaminiformans	1262	8.55626	0.215256	0.0253135	0.138588	0.138588	0.0171406	0.260036	0.940815	0.0499724895711146	0.324032414325656	0.713848457919288	0.017321024447797	0.713547782925164	0.558113507430387	0.639163331653435	0.00558431205717215	0.0917314
s__Rothia_dentocariosa	1262	76.5583	0.000132713	0.286353	0.138278	0.138278	-0.115925	0.392481	0.720933	0.00744790004097338	0.123327653215785	0.859973759221089	0.630992201219083	0.310274946557178	1.6949144071099e-07	0.242990167308691	0.0419261675968508	0.49853
s__Prevotella_bivia	1262	14.7086	0.40132	0.0346877	0.138146	0.138146	0.00994382	0.266349	0.566345	0.0837621009842837	0.690336130587906	0.503017346158705	0.0316900308943305	0.283190125137746	0.600288322839462	0.699084083487529	0.0815229720841182	0.115893
s__Fusobacterium_varium	1262	2.82384	0.654555	0.0182638	0.138106	0.138106	0.0234209	0.252791	0.130685	0.10463176917841	0.0601695095560792	0.382733088885226	0.367053313162153	1	0.0358290822760981	0.952052441876164	1	0.0723045
s__Anaerofustis_stercorihominis	1156	26.7329	0.335231	0.0684697	0.1368	0.1368	-0.0103665	0.283967	0.964619	0.0635965956377238	0.00596628358696815	NA	0.931957090414778	0.362574635634466	0.30544804067441	0.974975591210488	NA	0.187561
s__Eubacterium_nodatum	1156	20.759	0.132107	0.0582955	0.135501	0.135501	-0.00475852	0.275761	0.172141	0.131733208258922	0.0264720017115246	NA	0.0273364767066188	0.159309393367584	0.30544804067441	0.0866818379078535	NA	0.168474
s__Clostridium_innocuum	1262	45.0193	0.0814043	0.111368	0.13538	0.13538	-0.0312829	0.302044	0.418608	0.914038724944745	0.0454913740365966	0.44478702480237	0.799626032096564	0.711892051668876	0.00307110981024651	0.718698091100968	0.333710695743566	0.261669
s__Flavonifractor_sp_An10	1202	0.0155712	0.44149	0.0210589	0.134307	0.134307	0.0201998	0.248413	0.0377398	0.144443583842896	0.21013441208994	0.300726840542975	0.156696415161484	0.320616436175645	0.809934605995998	0.0726126815322644	NA	0.0795558
s__Stomatobaculum_longum	1142	9.53618	0.696281	0.0416832	0.133312	0.133312	0.00502083	0.261604	0.130685	0.634024631084434	0.687057176203549	0.382733088885226	NA	0.455827784706208	0.0706043414452477	0.933153743033022	NA	0.132379
s__Blautia_hydrogenotrophica	1202	0	0.918449	0.02435	0.130932	0.130932	0.0169568	0.244906	0.555985	0.0800975978662433	0.553566043546429	0.20080235530146	0.826591813597946	0.65031549712991	0.0117510438089428	0.717899348087848	NA	0.0896167
s__Coprobacillus_cateniformis	1202	11.1104	0.693657	0.0484525	0.127827	0.127827	0.000868916	0.254786	0.805842	0.911428852095299	0.38602887909645	0.513787947504946	0.908600192312049	0.517753576798071	0.251526098013283	0.229827595008744	NA	0.147436
s__Bacteroides_sp_CAG_530	1134	0	0.822167	0.0344949	0.126442	0.126442	0.0092264	0.243658	0.564339	0.202929390403277	NA	0.382733088885226	0.367053313162153	0.42581862412276	0.804107275062302	0.422985444641022	0.00477761907662657	0.115893
s__Citrobacter_pasteurii	1137	0.00172067	0.418049	0.0355189	0.125868	0.125868	0.00852699	0.243208	0.893668	0.910948005773161	0.826594856577742	0.382733088885226	0.103502322708967	0.159309393367584	NA	0.416360240805065	0.0419261675968508	0.117258
s__Actinomyces_sp_oral_taxon_414	1156	24.0635	0.141451	0.0870811	0.12579	0.12579	-0.0183034	0.269883	0.399775	0.117819457714061	0.32002438421807	NA	0.0180380502611579	1	0.614780365163334	0.049619654255805	NA	0.221731
s__Phascolarctobacterium_faecium	1262	61.1716	0.0115901	0.215155	0.125732	0.125732	-0.0730799	0.324545	0.0265573	0.184240929112557	0.072399833441826	0.278010944388859	0.657451106561674	0.0757814952634077	0.408290156973477	0.571313972072065	0.0131222100033487	0.410427
s__Gemella_sanguinis	1262	0	0.488716	0.0291488	0.123875	0.123875	0.0125781	0.235171	0.135956	0.624461897624792	0.850236614441406	0.104421475799795	0.970261850028436	0.673717618493674	0.162296217036158	0.177711941103144	0.0815229720841182	0.102109
s__Streptococcus_sp_HMSC071D03	1156	0	0.959904	0.0369246	0.123697	0.123697	0.00750699	0.239886	0.300644	0.0433670923319051	0.821831285088897	NA	0.961999755373719	1	0.30544804067441	0.210997020670109	NA	0.120579
s__Gemmiger_sp_An50	1156	0	0.600532	0.0375313	0.123387	0.123387	0.00711709	0.239658	0.070944	0.10463176917841	0.409500109565937	NA	0.367053313162153	0.326706554868585	0.142507979464399	0.256734139812629	NA	0.121191
s__Prevotella_buccae	1095	9.70106	0.316775	0.0702733	0.121969	0.121969	-0.0100949	0.254032	0.130685	NA	0.09341207495122	0.950241615743525	NA	0.100797596986451	0.142507979464399	0.0170868602820148	0.160802121440221	0.188054
s__Erysipelatoclostridium_ramosum	1262	65.003	0.00664849	0.257416	0.120788	0.120788	-0.0882507	0.329827	0.318076	0.981829372179073	0.000458464481371249	0.93993275793362	0.157069078630761	0.144054729215027	0.000100204359233809	0.848988369783402	0.0815229720841182	0.462071
s__Enterococcus_faecalis	1262	0.00725049	0.484381	0.0336723	0.120612	0.120612	0.0093135	0.231911	0.48738	0.12298801092433	0.0900106620409935	0.642882124605385	0.490419577614928	0.994386743636765	0.255477819142842	0.580012882475545	0.021577191872833	0.114486
s__Klebsiella_michiganensis	1262	0	0.562153	0.0357049	0.119239	0.119239	0.00796573	0.230512	0.0266047	0.00331462694688931	0.394601967062698	0.366875735269181	0.367053313162153	0.159309393367584	0.884235137675881	0.714511307883757	0.160802121440221	0.117258
s__Aeromonas_veronii	1049	18.4052	0.541982	0.108707	0.11862	0.11862	-0.0263217	0.263561	0.291319	NA	0.144765564652048	NA	0.190122358664165	0.326706554868585	0.30544804067441	0.42821507741522	NA	0.257512
s__Desulfovibrio_piger	1262	49.1402	0.0613149	0.18142	0.118284	0.118284	-0.0551921	0.291761	0.010997	0.363976555150947	0.287786624662545	0.175103793347345	0.391998957175123	0.124627671680515	0.169962592466929	0.0192231771754287	0.0205425062622762	0.367933
s__Cardiobacterium_valvarum	1142	35.1103	0.234753	0.149407	0.117521	0.117521	-0.0422545	0.277296	0.291319	0.396900449360869	0.45391396807738	0.382733088885226	NA	1	0.142507979464399	0.125896885857475	NA	0.325877
s__Clostridiales_bacterium_1_7_47FAA	1202	1.33457	0.685992	0.0475436	0.1169	0.1169	0.00126619	0.232534	0.731333	0.699004421342554	0.0632207475032562	0.950241615743525	0.59150693618864	0.142356705013391	0.0502514559771381	0.881594402993496	NA	0.146171
s__Streptococcus_viridans	1202	0	0.59385	0.0455284	0.116332	0.116332	0.00231389	0.23035	1	0.193361959643781	0.109106023875678	0.950241615743525	0.891062681751321	0.552394771173143	0.346939497544699	0.0459445823566711	NA	0.141935
s__Enorma_massiliensis	1262	0.000516493	0.218573	0.0413497	0.115909	0.115909	0.00454783	0.22727	0.485453	0.972386992782501	0.0797872113080499	0.330504334247032	0.0130666619740767	0.554657493121209	0.00282935908221432	0.0716548426239977	0.0815229720841182	0.132045
s__Peptoniphilus_duerdenii	1042	0	0.953846	0.0652653	0.115134	0.115134	-0.00727786	0.237545		0.257348456908861	0.520893320084	NA	0.367053313162153	0.326706554868585	0.95467131576096	0.259177902580758	NA	0.182238
s__Prevotella_sp_885	1216	0	0.992553	0.0465527	0.114982	0.114982	0.00175522	0.228209	0.848635	0.734370154702344	0.730050519373527	NA	0.485619682874008	0.770380164448409	0.0394167017035776	0.0866818379078535	0.10494618097535	0.14389
s__[Collinsella]_massiliensis	1262	83.686	9.42675e-06	0.459717	0.11456	0.11456	-0.189146	0.418267	0.444277	0.610254672716362	0.0157750705809216	0.0271453174577685	0.0238350636123354	0.31480035542646	3.76855077214011e-05	0.0139595658771674	0.356047744400602	0.656271
s__Oribacterium_parvum	1262	28.1351	0.206941	0.119222	0.114055	0.114055	-0.0294216	0.257531	0.336228	0.484644883365599	0.314841008313952	0.382733088885226	0.943018398253596	0.0795876373882604	0.0706043414452477	0.0106291781830406	0.0815229720841182	0.272372
s__Alistipes_onderdonkii	1262	34.8253	0.100803	0.150842	0.111463	0.111463	-0.0406108	0.263537	0.804079	0.00922784808723735	0.575487052406396	0.697210960416984	0.421223712614197	0.0216216461140208	0.264541531086278	0.642947176074336	0.038987179859959	0.32777
s__Prevotella_corporis	1216	0.000430817	0.268657	0.0553899	0.11085	0.11085	-0.00255505	0.224255	0.837148	0.00891224422716855	0.774820706937638	NA	0.057206909967281	0.939211687452469	0.793728890651312	0.195908915388278	0.338418286252344	0.160881
s__Eubacterium_sp_CAG_180	1262	0	0.96693	0.0526327	0.109906	0.109906	-0.00125005	0.221063	0.512512	0.0056909341346875	0.258104572268389	0.224287271739983	0.379662781329779	0.900497924314473	0.0139190195647346	0.088144302459494	0.431573689432813	0.154964
s__Bacteroides_xylanisolvens	1262	72.5876	0.000819386	0.362606	0.109384	0.109384	-0.126101	0.344869	0.0305452	0.0025991965724255	0.310828427582315	0.579479973204793	0.374231616143171	0.971358660167208	0.000511791591911039	0.975859200000244	0.00861426963168816	0.575499
s__Clostridium_sp_CAG_413	1262	45.0747	0.0458541	0.200632	0.108766	0.108766	-0.0578108	0.275342	0.584972	0.0452415681214509	0.090418698223585	0.294893983818087	0.190122358664165	0.582777617292422	0.0706043414452477	0.0537630529574069	0.025946862583607	0.388094
s__Eubacterium_sulci	1262	20.8524	0.272897	0.115842	0.108314	0.108314	-0.0266911	0.243318	0.190178	0.448509048951969	0.00902182500244049	0.382733088885226	0.595076475289937	0.748984585722571	0.63818157949477	0.437151900997337	0.333710695743566	0.266759
s__Prevotella_sp_CAG_279	1262	31.6346	0.123306	0.154511	0.107481	0.107481	-0.0404767	0.255438	0.153753	0.101398361699324	0.53721161780959	0.0185314666992243	0.15038185904095	0.0582963544758711	0.902857568447893	0.67912604009345	0.126754656817177	0.333237
s__Dorea_sp_D27	1156	0	0.700306	0.0701282	0.107394	0.107394	-0.00882847	0.223617	0.360436	0.10463176917841	0.499521417631424	NA	0.961999755373719	0.326706554868585	0.30544804067441	0.259177902580758	NA	0.188054
s__Klebsiella_oxytoca	1262	0	0.426623	0.0604253	0.10661	0.10661	-0.004672	0.217891	0.535497	0.0470463022896379	0.142297804167114	0.439887996711956	0.190122358664165	0.310274946557178	0.353822075924416	0.850059616259077	0.371041270886211	0.172048
s__Subdoligranulum_variabile	1202	67.7226	0.0103937	0.353356	0.105883	0.105883	-0.117721	0.329487	0.224488	0.000627021595377651	0.0571260258445896	0.0566228665813191	0.877456736275299	0.629601177803402	0.367844034380481	0.051914385592757	NA	0.568913
s__Streptococcus_gordonii	1202	0	0.43156	0.069127	0.105754	0.105754	-0.00828393	0.219792	0.0490954	0.471382654889482	0.270644317190419	0.804930980529198	0.579316794862678	0.842924484727652	0.00181723567048856	0.0889086101384984	NA	0.188054
s__Barnesiella_intestinihominis	1262	0.0030843	0.562665	0.0627671	0.105624	0.105624	-0.00562652	0.216874	0.830693	0.0071542504153441	0.0112267818870655	0.338697628236806	0.586244537177778	0.981760029939883	0.926866420939381	0.315748206603571	0.790773851840212	0.176972
s__Negativicoccus_succinicivorans	1142	0	0.888547	0.0771406	0.105427	0.105427	-0.0114784	0.222332	0.825697	0.741349956934042	0.45391396807738	0.382733088885226	NA	0.733892979962912	0.95467131576096	0.467760411434321	NA	0.202669
s__Citrobacter_farmeri	984	0	0.607304	0.101393	0.105291	0.105291	-0.0206853	0.231267	0.291319	NA	0.409500109565937	NA	0.367053313162153	0.326706554868585	NA	0.965784855544305	0.160802121440221	0.24624
s__Lactobacillus_mucosae	1216	20.0764	0.229922	0.131504	0.104714	0.104714	-0.0313663	0.240795	0.271357	0.866404099674027	0.372028670377168	NA	0.190122358664165	0.582777617292422	0.368379893093917	0.058873226642928	0.147168861010202	0.295327
s__Actinomyces_sp_oral_taxon_180	1202	0	0.809564	0.076509	0.102986	0.102986	-0.0109685	0.216941	0.468861	0.806297468976165	0.919644173215238	0.642882124605385	0.171069242261361	0.319671645109629	0.30544804067441	0.0934309306687133	NA	0.201928
s__Lactobacillus_crispatus	1216	46.8402	0.0523936	0.240562	0.10296	0.10296	-0.0689898	0.274909	0.336228	0.233434328947522	0.209556959317806	NA	0.0174783721696394	0.326706554868585	0.928969972978148	0.781044483641216	0.00981995493289252	0.440015
s__Streptococcus_sanguinis	1202	47.895	0.0819233	0.250895	0.102958	0.102958	-0.0727934	0.278709	0.0110972	0.133737971601491	0.822063784426972	0.775133941216461	0.31777660244035	0.160615076322083	0.0210616612701474	0.0701658089126473	NA	0.453269
s__Streptococcus_lutetiensis	1262	50.5682	0.0395254	0.25212	0.10278	0.10278	-0.0731217	0.278683	0.298386	0.18329113017459	0.515247478943858	0.110244420486825	0.391647414989355	0.976650358679359	0.0183768259800833	0.103491438857074	0.160802121440221	0.453972
s__Actinomyces_odontolyticus	1262	26.6953	0.218974	0.156043	0.10259	0.10259	-0.0391598	0.24434	0.343162	0.0592483310930269	0.307311209635181	0.807497268843293	0.306558073611266	0.597613306695049	0.382549079538093	0.0119904656839139	0.160802121440221	0.33529
s__Porphyromonas_gingivalis	1096	0	0.721359	0.0927095	0.102387	0.102387	-0.0169718	0.221747	0.360436	0.257348456908861	0.767729394591155	NA	NA	1	0.30544804067441	0.00177951209026921	NA	0.229983
s__Lactobacillus_gasseri	1262	0.00733177	0.256878	0.0731687	0.10178	0.10178	-0.00955368	0.213113	0.834659	0.589223009603375	0.238846378737274	0.439647769624178	0.465475461463608	0.957943518707565	0.210359657941034	0.303106692118333	0.0110350863369353	0.194892
s__Parabacteroides_gordonii	1109	52.3678	0.0352037	0.302864	0.101385	0.101385	-0.0914796	0.294249	0.242472	NA	0.0783392569473456	NA	0.367053313162153	0.0525784601635327	0.367844034380481	0.228649710166823	0.0815229720841182	0.513164
s__Faecalitalea_cylindroides	1156	0	0.716542	0.0876347	0.10127	0.10127	-0.0149387	0.217478	0.843787	0.808568435674889	0.222083613167912	NA	0.652624889345421	0.261313664703655	0.983568216772944	0.286716390848138	NA	0.221818
s__Leptotrichia_wadei	1096	41.9377	0.142393	0.247851	0.10112	0.10112	-0.0703877	0.272628	0.130685	0.257348456908861	0.237107019143383	NA	NA	0.629601177803402	0.30544804067441	0.0476095859279148	NA	0.451917
s__Alistipes_putredinis	1262	0	0.627523	0.0751796	0.100977	0.100977	-0.0102486	0.212202	0.20008	0.0118938891001187	0.98063897453372	0.765853157695129	0.818261719070362	0.456643069204743	0.734969809486345	0.178799938463105	0.609961696184303	0.199329
s__Actinomyces_sp_oral_taxon_897	1052	9.23926	0.336552	0.139519	0.100669	0.100669	-0.0328648	0.234202	0.0622651	0.449595919533104	0.767729394591155	NA	0.680390335586726	NA	0.344783405090221	0.0232634225122306	NA	0.311359
s__Abiotrophia_defectiva	1262	19.603	0.22134	0.142749	0.0999436	0.0999436	-0.0337095	0.233597	0.0600797	0.310475985471865	0.413038064651792	0.0338301514579238	0.961999755373719	0.642110127970343	0.0358290822760981	0.128319586775625	0.333710695743566	0.316127
s__Eubacteriaceae_bacterium_CHKCI005	1202	41.6625	0.108111	0.237676	0.0997408	0.0997408	-0.0658129	0.265294	0.510339	0.00904691645912522	0.662929202002718	0.525898878133448	0.11384435344403	0.164049575967269	0.138910954165459	0.901943842516444	NA	0.436117
s__Scardovia_wiggsiae	1262	0	0.544414	0.0796577	0.0994737	0.0994737	-0.0117647	0.210712	0.432173	0.420175412313703	0.208231544542795	0.906137559749188	0.807302951781314	0.629601177803402	0.106603261436089	0.380258096350006	0.597189314622896	0.207397
s__Streptococcus_downei	1096	0.0105929	0.3878	0.104678	0.0988759	0.0988759	-0.0205587	0.21831	0.189672	0.393310508654877	0.419634458983773	NA	NA	0.326706554868585	0.0706043414452477	0.182269277164928	NA	0.251052
s__Citrobacter_werkmanii	1137	0	0.490429	0.0985618	0.0988381	0.0988381	-0.0184348	0.216111	0.498976	0.781299539836952	0.22571634960675	0.382733088885226	0.367053313162153	0.159309393367584	NA	0.463166203569918	0.0815229720841182	0.240374
s__Citrobacter_youngae	1262	0.00676464	0.290413	0.0878829	0.0969307	0.0969307	-0.0143857	0.208247	0.172146	0.685482828950767	0.577028794955818	0.110244420486825	0.190122358664165	0.168600752556011	0.367844034380481	0.889018728392363	0.0110350863369353	0.221818
s__Desulfovibrionaceae_bacterium	1262	36.6554	0.131671	0.222168	0.0960964	0.0960964	-0.0581861	0.250379	0.706435	0.222292708513491	0.134182192168832	0.910194962274116	0.0566473610421689	0.547534627019499	0.104053991902338	0.00956100174873322	1	0.416926
s__Bacteroides_oleiciplenus	1096	0.0197465	0.323826	0.115021	0.0960553	0.0960553	-0.0234005	0.215511	0.940258	0.257348456908861	0.706057097496483	NA	NA	0.252184919051877	0.142507979464399	0.0511213975204056	NA	0.265928
s__Parascardovia_denticolens	1202	16.2811	0.210788	0.158191	0.0957738	0.0957738	-0.0372445	0.228792	0.0527242	0.948470376257303	0.808678704031683	0.0566228665813191	0.197383601951043	1	0.0816829288214564	0.0871456614962015	NA	0.337395
s__Peptoniphilus_coxii	1088	14.3538	0.628905	0.175385	0.0957526	0.0957526	-0.0427401	0.234245		0.758035332074205	0.409500109565937	0.382733088885226	0.961999755373719	0.159309393367584	0.30544804067441	0.449043532474837	NA	0.358208
s__Streptococcus_vestibularis	1262	0	0.799648	0.0952522	0.0946381	0.0946381	-0.016544	0.20582	0.354421	0.914495382158087	0.18592433105007	0.838316654161585	0.476093023704877	0.940465147677361	0.372075109284177	0.237215773382093	0.333710695743566	0.235281
s__Fusobacterium_ulcerans	1142	0	0.750157	0.112976	0.0945488	0.0945488	-0.0223707	0.211468	0.360436	0.10463176917841	0.200351796769892	0.382733088885226	NA	0.567488824907502	0.30544804067441	0.0284939167456249	NA	0.26349
s__Citrobacter_freundii	1262	7.81875	0.352353	0.131824	0.0925944	0.0925944	-0.0278356	0.213024	0.206383	0.932285082245199	0.760052661251382	0.20080235530146	0.367053313162153	0.0525784601635327	0.724170515388278	0.223218273232657	0.0815229720841182	0.295327
s__Clostridium_celatum	1202	43.5989	0.0896954	0.282115	0.0924155	0.0924155	-0.0759875	0.260819	0.41565	0.113071643449501	0.204800495552846	0.382733088885226	0.961999755373719	0.667432067531832	0.281125736216025	0.046669054027165	NA	0.495271
s__Staphylococcus_aureus	949	0	0.460609	0.161864	0.0915213	0.0915213	-0.0367132	0.219756	0.372879	0.396900449360869	NA	0.950241615743525	0.367053313162153	0.552394771173143	NA	0.798268507420226	NA	0.3427
s__Bacteroides_sp_43_108	1202	0	0.703292	0.117117	0.0911104	0.0911104	-0.022849	0.20507	0.486059	0.257348456908861	0.240508660367924	0.382733088885226	0.367053313162153	0.582777617292422	0.972793417410595	0.259177902580758	NA	0.268626
s__Enterococcus_avium	973	55.1108	0.0575469	0.420948	0.0904827	0.0904827	-0.12988	0.310845	0.126789	0.901167044934696	0.0147440960159141	0.680226786761938	NA	NA	NA	0.511589918576483	0.0419261675968508	0.627082
s__Veillonella_sp_T11011_6	1262	51.615	0.0425351	0.323048	0.0897515	0.0897515	-0.0882562	0.267759	0.800703	0.00605983858287283	0.165037486897768	0.839114138071234	1	0.435231660446122	0.664719221156712	0.798128825986316	0.026375137983115	0.53349
s__Sanguibacteroides_justesenii	1202	0.0209569	0.178687	0.128155	0.0885887	0.0885887	-0.0255354	0.202713	0.26907	0.0441951829886937	0.140681652413228	0.323210254396811	0.00275947276540467	0.952274636794	0.34100398903455	0.39581046907647	NA	0.290484
s__Bacillus_aerius	1096	0.000122142	0.47516	0.148261	0.0880611	0.0880611	-0.0313249	0.207447	0.411501	0.0615172255638113	0.409500109565937	NA	NA	0.159309393367584	0.920298529732366	0.259177902580758	NA	0.324601
s__Veillonella_sp_CAG_933	1262	55.0316	0.028953	0.356655	0.0869022	0.0869022	-0.0978808	0.271685	0.232441	0.330664887174403	0.269637613612927	0.00981502830569543	0.410582606517758	0.501478542653193	0.667262080598146	0.288040716930383	0.00558431205717215	0.571411
s__Ruminococcus_sp_CAG_488	1216	16.0258	0.1925	0.197713	0.0864584	0.0864584	-0.0450966	0.218013	0.42771	0.257348456908861	0.796076638504789	NA	0.190122358664165	0.398316391313845	0.459041023503199	0.0384217449604736	0.0262602474279079	0.388094
s__Flavonifractor_sp_An82	1156	0.0185305	0.556162	0.147877	0.0858233	0.0858233	-0.0304187	0.202065	0.360436	0.257348456908861	0.409500109565937	NA	0.300371377863526	0.326706554868585	0.95467131576096	0.102788483696839	NA	0.324601
s__Bacteroides_faecis_CAG_32	1262	0	0.680764	0.131002	0.0856777	0.0856777	-0.0255191	0.196874	0.820135	0.0422916878960254	0.902084396611865	0.217070558338318	0.878698383050233	0.0479523244586103	0.237471468345824	0.121266240936336	0.0419261675968508	0.295327
s__Peptoniphilus_lacrimalis	1142	5.55371	0.695168	0.174518	0.0856018	0.0856018	-0.0379604	0.209164	0.532649	0.781299539836952	0.821831285088897	0.382733088885226	NA	0.0911688865151674	0.281125736216025	0.545540787131248	NA	0.358208
s__Veillonella_tobetsuensis	1262	21.2193	0.290209	0.216232	0.0853897	0.0853897	-0.0499488	0.220728	0.785473	0.00891224422716855	0.317004189322202	0.294893983818087	0.877456736275299	0.340489955806846	0.483675170070977	0.125940351437012	1	0.411126
s__Anaeroglobus_geminatus	1142	34.8578	0.199506	0.300284	0.0842603	0.0842603	-0.0751751	0.243696	0.291319	0.395597366997888	0.0385724890516049	0.718372718858133	NA	0.159309393367584	0.0706043414452477	0.791942729570018	NA	0.512489
s__Pseudomonas_aeruginosa_group	967	0	0.564654	0.200761	0.082808	0.082808	-0.0440503	0.209666	0.940258	NA	NA	0.113548722619162	0.367053313162153	0.702694158501008	0.155861535131275	0.951677801387917	NA	0.388094
s__Leptotrichia_sp_oral_taxon_215	1028	24.7018	0.360374	0.303637	0.0814299	0.0814299	-0.0737223	0.236582	0.291319	0.257348456908861	NA	NA	0.190122358664165	1	0.30544804067441	0.379225528623955	NA	0.513164
s__Atopobium_vaginae	1142	11.5529	0.329457	0.224512	0.0809501	0.0809501	-0.0496747	0.211575	0.920402	0.257348456908861	0.240508660367924	0.382733088885226	NA	0.159309393367584	0.344783405090221	0.10959749056521	NA	0.418606
s__Citrobacter_europaeus	1156	0	0.646839	0.17246	0.0808759	0.0808759	-0.0353075	0.197059	0.291319	0.257348456908861	0.237107019143383	NA	NA	0.326706554868585	0.972793417410595	0.814535746866796	0.333710695743566	0.358208
s__Neisseria_subflava	1202	42.0337	0.0871567	0.341528	0.0806028	0.0806028	-0.0854895	0.246695	0.130685	0.421881661901137	0.188771580970896	0.110244420486825	NA	1	0.142507979464399	0.0207154413502516	0.160802121440221	0.551406
s__Lachnoclostridium_sp_An118	1202	0	0.875548	0.167529	0.0802134	0.0802134	-0.0336952	0.194122	0.950751	0.189674343778465	0.454770133139532	0.382733088885226	0.841999654334459	0.976650358679359	0.471810999373771	0.494113309377396	NA	0.352115
s__Anaerobiospirillum_thomasii	1262	0.0177797	0.279214	0.158129	0.0801536	0.0801536	-0.0311537	0.191461	0.837728	0.10463176917841	0.090418698223585	0.294893983818087	0.623855475563343	0.976650358679359	0.508166197673916	0.259177902580758	0.0815229720841182	0.337395
s__Leuconostoc_mesenteroides	1156	0	0.729497	0.177072	0.0800122	0.0800122	-0.0361667	0.196191	0.61302	0.601116072962518	0.409500109565937	NA	0.486296323184218	0.490538431836902	0.294024680286274	0.10959749056521	NA	0.36038
s__Sellimonas_intestinalis	1202	32.2896	0.184652	0.305815	0.07957	0.07957	-0.0727229	0.231863	0.994502	0.582449742123192	0.0952417131249278	0.880205467622124	0.401888215035273	0.203300495874748	0.0155422493332058	0.813287472481128	NA	0.515339
s__Abiotrophia_sp_HMSC24B09	1262	23.6401	0.202318	0.260772	0.0793137	0.0793137	-0.0589188	0.217546	0.229808	0.36298876563426	0.250675313448937	0.0611571411669794	0.372983391596647	0.552394771173143	0.0358290822760981	0.327473602582543	0.333710695743566	0.466644
s__Lactobacillus_reuteri	1216	0	0.713212	0.17535	0.0783138	0.0783138	-0.0349468	0.191574	0.185377	0.89731852026165	0.237107019143383	NA	0.103502322708967	0.380590739923822	0.281125736216025	0.80430123627528	0.333710695743566	0.358208
s__Clostridium_asparagiforme	1262	7.01142	0.528079	0.199011	0.078281	0.078281	-0.0411762	0.197738	0.289159	0.149313247817339	0.274183883406895	0.853003646371388	0.289266283998668	0.875996362673371	0.0293992944029881	0.896172632343111	0.160802121440221	0.388094
s__Prevotella_sp_CAG_617	1052	24.7554	0.346137	0.319301	0.0777237	0.0777237	-0.0752398	0.230687	0.893668	0.10463176917841	0.144020869885282	NA	0.190122358664165	NA	0.142507979464399	0.379225528623955	NA	0.531861
s__Comamonas_kerstersii	1030	14.2942	0.436558	0.29032	0.0776302	0.0776302	-0.06626	0.22152	0.360436	NA	0.754311142553046	0.642882124605385	0.367053313162153	0.552394771173143	NA	0.00610407867797821	0.0981325034001599	0.503919
s__Megasphaera_sp_MJR8396C	1137	0	0.773869	0.200017	0.0766167	0.0766167	-0.0405627	0.193796	0.498976	0.395597366997888	0.409500109565937	0.20080235530146	0.680390335586726	0.642110127970343	NA	0.688489166666414	0.160802121440221	0.388094
s__Enterococcus_gallinarum	1033	69.2422	0.00954226	0.560761	0.0761543	0.0761543	-0.180432	0.332741	0.0600797	0.222292708513491	0.237107019143383	0.20080235530146	0.367053313162153	NA	NA	0.299134953713099	0.00278800630081608	0.734965
s__Streptococcus_pseudopneumoniae	1216	0	0.513879	0.188311	0.0760476	0.0760476	-0.0372478	0.189343	0.511524	0.301886831257059	0.144765564652048	NA	0.467972190562122	1	0.142507979464399	0.107413831146315	0.333710695743566	0.376622
s__Denitrobacterium_detoxificans	1202	74.8115	0.00082083	0.555341	0.0758579	0.0758579	-0.176236	0.327952	0.143684	0.123012283649337	0.125487728816515	0.874527969784602	0.864547259413863	0.51133924519489	3.79651803532298e-05	0.0496905023121929	NA	0.731178
s__Lachnoclostridium_sp_An298	1052	0.00199441	0.354782	0.224497	0.0755642	0.0755642	-0.0463659	0.197494	0.486059	0.10463176917841	0.409500109565937	NA	0.300371377863526	NA	0.344783405090221	0.102788483696839	NA	0.418606
s__Bifidobacterium_pseudolongum	1158	0.00102429	0.338951	0.205648	0.0750414	0.0750414	-0.0411688	0.191252	0.473326	0.741349956934042	0.237107019143383	0.294893983818087	0.367053313162153	NA	0.30544804067441	0.42821507741522	0.0419261675968508	0.396214
s__Prevotella_buccalis	1202	24.6759	0.231052	0.318677	0.0726182	0.0726182	-0.0701132	0.21535	0.486059	0.262062670105265	0.600363562337968	0.294893983818087	NA	0.407362671015977	0.0351968965708896	0.378197915418252	0.333710695743566	0.531861
s__Bacteroides_coprophilus	1202	18.1754	0.336103	0.301113	0.0712792	0.0712792	-0.0638254	0.206384	0.243463	0.00176524972406707	0.41674356717561	0.838316654161585	0.877456736275299	0.552394771173143	0.214606748345357	0.985155371714658	NA	0.512489
s__Actinomyces_massiliensis	1052	36.8925	0.164163	0.413464	0.0710064	0.0710064	-0.0991671	0.24118	0.266321	0.838916674902461	0.144765564652048	NA	0.992564436511572	NA	0.0706043414452477	0.297350005998735	NA	0.620733
s__Oscillibacter_sp_57_20	1262	63.4446	0.0111963	0.496192	0.0710019	0.0710019	-0.133498	0.275502	0.583905	0.0213872914507589	0.473955614810461	0.906174805916715	0.0386058744327011	0.531489922801998	0.0096941577925863	0.243440269628591	0.467022269575264	0.687767
s__Blastocystis_sp_subtype_1	1134	52.6204	0.0556963	0.472777	0.0706889	0.0706889	-0.122283	0.263661	0.291319	0.840562690057685	NA	0.382733088885226	0.190122358664165	0.326706554868585	0.00527495246578165	0.285059306195182	0.0114429765328044	0.669768
s__Streptococcus_infantis	1262	0	0.549522	0.213155	0.070639	0.070639	-0.0405715	0.18185	0.106635	0.395696784697715	0.318426365411012	0.110244420486825	0.993832855818661	1	0.0846973170936271	0.105915691144795	0.0815229720841182	0.407959
s__Bifidobacterium_dentium	1262	17.5933	0.251461	0.292688	0.0705107	0.0705107	-0.0608262	0.201848	0.286106	0.344175981895415	0.0972929957077531	0.883800197316654	0.687558162024747	0.292943009044256	0.0709338372010381	0.65002189280552	0.597189314622896	0.504689
s__Prevotella_sp_CAG_1185	1202	37.2948	0.126461	0.389028	0.0699301	0.0699301	-0.089187	0.229047	0.819453	0.409277665600397	0.0762883878315225	0.736769275493042	0.0566473610421689	0.159309393367584	0.0413415195194894	0.972230249591156	NA	0.602312
s__Megasphaera_elsdenii	1262	42.4602	0.0604897	0.399979	0.0698802	0.0698802	-0.0928492	0.23261	0.828708	0.0199656945629463	0.731833775735988	0.20080235530146	0.699211805152071	0.567488824907502	0.139582047299575	0.983031377319288	0.00010067775630495	0.609994
s__Atopobium_deltae	1262	0.00480297	0.421477	0.219247	0.0697267	0.0697267	-0.0415132	0.180967	0.289384	0.451848775307941	0.241666295102987	0.540444176980081	0.792931349613354	0.253789752125979	0.0707054065209856	0.149985728995297	0.333710695743566	0.412785
s__Streptococcus_sinensis	1216	0	0.514018	0.230346	0.0693316	0.0693316	-0.0439582	0.182621	0.291319	0.724785322342108	0.229924561759086	NA	0.623855475563343	0.326706554868585	0.142507979464399	0.61287755824321	0.333710695743566	0.426731
s__Veillonella_atypica	1262	52.8738	0.0375285	0.451201	0.0692973	0.0692973	-0.110975	0.24957	0.837052	0.050496709175545	0.277862415555313	0.391610954550597	0.156081708776407	0.841436352283038	0.742853933753404	0.71104955159805	0.151511088684402	0.650359
s__Anaeromassilibacillus_sp_An250	1202	0.00567043	0.351401	0.234724	0.0691278	0.0691278	-0.0448927	0.183148	0.261844	0.446308294931322	0.955320471102929	0.317390511408796	0.521575132113655	0.887158176182636	0.19560833963397	0.0943868505826368	NA	0.432072
s__Prevotella_sp_CAG_1092	1158	3.25942	0.431939	0.262239	0.0689143	0.0689143	-0.0515635	0.189392	0.130685	0.222292708513491	0.409500109565937	0.382733088885226	0.961999755373719	NA	0.353822075924416	0.873723265428046	0.0542557171844141	0.467821
s__Klebsiella_aerogenes	970	0.00718492	0.481291	0.301464	0.0668972	0.0668972	-0.0599936	0.193788	0.353184	NA	0.34959690409683	0.366875735269181	NA	0.0544299670546048	NA	0.713453518878935	0.341442049421526	0.512489
s__Lachnospiraceae_bacterium_oral_taxon_096	1156	43.9246	0.103694	0.444559	0.0667474	0.0667474	-0.10437	0.237865	0.667016	0.396900449360869	0.090418698223585	NA	0.924085656273987	0.0231385456724483	0.0706043414452477	0.545079682961646	NA	0.647242
s__Murimonas_intestini	1156	31.2247	0.233202	0.392857	0.0665664	0.0665664	-0.0861263	0.219259	0.532649	0.840562690057685	0.804359367159738	NA	NA	0.163241656469076	0.142507979464399	0.178969889265084	0.333710695743566	0.602312
s__Leclercia_adecarboxylata	991	0	0.412346	0.301299	0.0662055	0.0662055	-0.0593304	0.191741	0.291319	NA	0.240508660367924	0.382733088885226	NA	NA	0.30544804067441	0.530415562256525	0.160802121440221	0.512489
s__Holdemanella_biformis	1262	47.2613	0.0566183	0.44615	0.0661007	0.0661007	-0.103953	0.236154	0.513631	0.00623005470740755	0.324230020530385	0.718372718858133	0.467111526483709	0.269567424361459	0.353506401327412	0.0102237323225082	0.0418059327773665	0.647926
s__Ruminococcus_torques	1262	61.0456	0.00314238	0.514327	0.0658863	0.0658863	-0.132138	0.263911	0.374536	0.0984339655927953	0.00930106922167621	0.991011943982692	0.864159998808023	0.919559645269103	0.753595742922573	6.49480578174656e-05	0.608614709802176	0.702791
s__Erysipelothrix_larvae	1156	43.6648	0.100427	0.45032	0.0656553	0.0656553	-0.104811	0.236122	0.120399	0.988286408574478	0.0655441677824486	NA	NA	0.976650358679359	0.273954390022468	0.175996973084532	0.333710695743566	0.650359
s__Firmicutes_bacterium_CAG_83	1262	0	0.793147	0.249385	0.0653212	0.0653212	-0.0458285	0.176471	0.956887	0.121759699674963	0.458218124427051	0.78091825003036	0.964402348300723	0.0971470484239387	0.787258342855285	0.496151264332405	0.0641929894124049	0.453269
s__Leuconostoc_carnosum	638	38.4569	0.163057	0.531979	0.0641178	0.0641178	-0.136956	0.265191	0.189672	0.10463176917841	0.240508660367924	NA	0.961999755373719	0.326706554868585	0.142507979464399	NA	NA	0.711768
s__Oribacterium_sinus	1202	0	0.49946	0.278792	0.0629781	0.0629781	-0.0509928	0.176949	0.893544	0.403774160665378	0.958914705859179	0.503017346158705	0.961999755373719	0.445891032199726	0.0201353018058136	0.615524044101176	NA	0.492349
s__Paraprevotella_clara	1262	43.7855	0.0771631	0.454544	0.0628334	0.0628334	-0.101838	0.227505	0.927709	0.158218923654059	0.202218342193573	0.697514654748042	0.442358650743411	0.752607613434739	0.536770190481622	0.053472415790059	0.0112604994498667	0.651926
s__Oribacterium_sp_oral_taxon_078	1035	24.0699	0.28519	0.424571	0.0627747	0.0627747	-0.0913063	0.216856	0.130685	NA	0.409500109565937	0.294893983818087	NA	0.326706554868585	0.30544804067441	0.379225528623955	NA	0.630854
s__Streptococcus_sobrinus	1156	0	0.612004	0.292584	0.0623892	0.0623892	-0.0537952	0.178574	0.376022	0.376877084095828	0.682205026959215	NA	0.133408778285585	0.271264916318731	0.30544804067441	0.775654177685457	NA	0.504689
s__Klebsiella_quasipneumoniae	1262	0	0.859859	0.279395	0.0613322	0.0613322	-0.0497996	0.172464	0.104619	0.123343497524459	0.644265905972456	0.702482670920476	0.391647414989355	0.804626993478135	0.559905843552706	0.738683194138994	0.384200753380906	0.492349
s__Streptococcus_sp_HMSC070B10	1156	28.5496	0.219709	0.420942	0.0613279	0.0613279	-0.0880288	0.210685	0.346149	0.67577954047631	0.144765564652048	NA	0.110978213297642	1	0.30544804067441	0.859464398625992	NA	0.627082
s__Bacteroides_stercoris	1262	20.2902	0.331105	0.371331	0.0612531	0.0612531	-0.073038	0.195544	0.488795	0.0183803122096579	0.243652605996326	0.502277558440605	0.951839532776158	0.452454043704356	0.319977914928912	0.983533410614551	0.0212482065601536	0.58008
s__Propionibacterium_acidifaciens	1156	27.3523	0.191718	0.419138	0.06096	0.06096	-0.0869256	0.208846	0.644194	0.610735315286877	0.0571260258445896	NA	0.466941930967323	0.326706554868585	0.142507979464399	0.464209010113692	NA	0.627082
s__Blautia_coccoides	1262	47.6382	0.0507441	0.48876	0.0603407	0.0603407	-0.110494	0.231175	0.528548	0.047509622164667	0.0364824540155019	0.294893983818087	0.312746675810095	0.0265039630099696	0.570271678277737	0.0631522173782965	0.160802121440221	0.684028
s__Prevotella_sp_CAG_873	1262	7.73238	0.595635	0.331085	0.0596186	0.0596186	-0.0606063	0.179844	0.070944	0.000147958765644461	0.409500109565937	0.20080235530146	0.924085656273987	1	0.346939497544699	0.18000447115061	1	0.537548
s__Marvinbryantia_formatexigens	684	0	0.479509	0.444244	0.0589555	0.0589555	-0.0920819	0.209993	0.360436	0.741349956934042	0.409500109565937	0.382733088885226	0.924085656273987	0.319671645109629	0.266909075201002	NA	NA	0.647242
s__Desulfovibrio_fairfieldensis	1155	39.7368	0.131368	0.493138	0.0586466	0.0586466	-0.109077	0.22637	0.473326	NA	0.0339473443445187	0.950241615743525	0.924085656273987	1	0.344783405090221	0.0767921734569508	0.160802121440221	0.687581
s__Collinsella_stercoris	1262	61.693	0.00734313	0.565364	0.0586354	0.0586354	-0.141269	0.258539	0.344843	0.568972978403839	0.0328230191050592	0.124379286239674	0.0462378178286802	0.247939028630768	0.412858644914795	9.09212708422745e-05	0.930216551712979	0.739322
s__Acidaminococcus_fermentans	1262	13.8542	0.422614	0.367675	0.0584148	0.0584148	-0.0686792	0.185509	0.545893	0.221283180766817	0.621538881279234	0.294893983818087	0.103502322708967	0.326706554868585	0.142507979464399	0.317475076876088	1	0.57749
s__Streptococcus_peroris	1216	18.1082	0.242713	0.392836	0.0583414	0.0583414	-0.0754784	0.192161	0.105545	0.632766189884621	0.0635390688794641	NA	0.961999755373719	0.0434317101015428	0.0358290822760981	0.541357153978468	0.160802121440221	0.602312
s__Prevotella_sp_CAG_891	1202	0	0.510018	0.326194	0.0570876	0.0570876	-0.0568751	0.17105	0.291319	0.395597366997888	0.490120826882445	0.382733088885226	0.924085656273987	0.346356618504104	0.176109350604431	0.103527160371415	NA	0.534108
s__Enterococcus_durans	638	0	0.48675	0.476635	0.0567784	0.0567784	-0.0995794	0.213136	0.730455	0.613781297955019	0.409500109565937	NA	0.118227184836794	0.552394771173143	0.614780365163334	NA	NA	0.67194
s__Raoultella_planticola	1156	4.69105	0.332593	0.365884	0.0561424	0.0561424	-0.0655519	0.177837	0.920402	0.464137469948904	0.237107019143383	NA	0.300371377863526	0.326706554868585	0.344783405090221	0.788086014681443	NA	0.57749
s__Streptococcus_sp_HPH0090	1262	0.00252655	0.385023	0.328894	0.0554114	0.0554114	-0.0558244	0.166647	0.148228	0.522586922601718	0.617075291972845	0.294893983818087	0.904539627007347	0.961505302909911	0.0358290822760981	0.525691940662173	0.333710695743566	0.536305
s__Lactobacillus_amylovorus	1112	15.1362	0.384117	0.438958	0.0542091	0.0542091	-0.0830703	0.191489	0.130685	0.0186749233682111	0.409500109565937	NA	0.367053313162153	NA	0.508166197673916	0.810345642249783	0.570312769684932	0.645593
s__Bacteroides_fluxus	1202	0.00806599	0.443421	0.356885	0.0535814	0.0535814	-0.0604049	0.167568	0.360436	0.840562690057685	0.409500109565937	0.20080235530146	0.300371377863526	0.326706554868585	0.508166197673916	0.425595572007603	NA	0.571411
s__Lactobacillus_rhamnosus	1202	2.48781	0.577355	0.374617	0.0529812	0.0529812	-0.0639758	0.169938	0.983574	0.326182562542564	0.804359367159738	0.382733088885226	0.272863961032333	1	0.737740247620083	0.9057073522636	NA	0.583635
s__Campylobacter_concisus	1202	15.2802	0.33093	0.436062	0.0523696	0.0523696	-0.0794159	0.184155	0.865555	0.395597366997888	0.754311142553046	0.950241615743525	0.300371377863526	0.277839206630798	0.0183768259800833	0.298479546722957	NA	0.642969
s__Finegoldia_magna	1156	13.4888	0.525071	0.435646	0.0523277	0.0523277	-0.0792331	0.183889	0.579253	0.941482497603829	0.334252203661746	NA	0.391647414989355	0.159309393367584	0.273954390022468	0.215694907037171	NA	0.642969
s__Prevotella_sp_CAG_5226	1262	0.00238928	0.339614	0.358775	0.0520872	0.0520872	-0.059157	0.163331	0.848635	0.00397350150309791	0.730050519373527	0.382733088885226	0.623855475563343	0.582777617292422	0.941507205662072	0.0790420311231528	0.768595022474633	0.57285
s__Alloscardovia_omnicolens	1202	41.8313	0.103073	0.539334	0.051919	0.051919	-0.113861	0.217699	0.465695	0.306432556797542	0.0879249548549703	0.382733088885226	0.230381481138567	0.0607925324634586	0.044029524233585	0.245571626632899	NA	0.713353
s__Lactococcus_lactis	1262	6.01219	0.500916	0.390555	0.0518168	0.0518168	-0.0664663	0.1701	0.787346	0.206800462263652	0.0759699558620243	0.382733088885226	0.465956694662178	0.898555706919922	0.935269155050398	0.545723954363643	0.160802121440221	0.602312
s__Prevotella_colorans	1052	21.4445	0.419389	0.495522	0.051674	0.051674	-0.0969267	0.200275	0.291319	0.861589925299449	0.490120826882445	NA	0.367053313162153	NA	0.30544804067441	0.212211236023348	NA	0.687767
s__Megasphaera_hexanoica	1156	39.3562	0.121612	0.550553	0.049943	0.049943	-0.11404	0.213926	0.637482	0.00891224422716855	0.490120826882445	NA	0.300371377863526	0.326706554868585	0.30544804067441	0.892314103363246	NA	0.726529
s__Ruminococcus_obeum_CAG_39	1262	0	0.945973	0.37869	0.049898	0.049898	-0.0611969	0.160993	0.239176	0.424627950403018	0.334252203661746	0.946043891150405	0.841999654334459	0.713829314171304	0.874770039138404	0.0742258524035692	0.760389703219344	0.588395
s__Corynebacterium_argentoratense	1112	41.3503	0.107935	0.573639	0.0496166	0.0496166	-0.123205	0.222438	0.921916	0.395597366997888	0.754311142553046	NA	0.103502322708967	NA	0.142507979464399	0.176912530718226	0.0815229720841182	0.744301
s__Veillonella_rodentium	1216	0.000471907	0.261102	0.396648	0.0490148	0.0490148	-0.0643225	0.162352	0.879592	0.257348456908861	0.102498392889339	NA	0.133408778285585	0.159309393367584	0.508166197673916	0.846724280514527	0.333710695743566	0.606515
s__Streptococcus_sp_HMSC067H01	1202	0	0.506073	0.402843	0.0486396	0.0486396	-0.0653181	0.162597	0.12824	0.409277665600397	0.409500109565937	0.382733088885226	0.904539627007347	0.326706554868585	0.344783405090221	0.418758685259731	NA	0.611137
s__Ruminococcus_sp_CAG_403	1202	0	0.667221	0.405313	0.0483698	0.0483698	-0.0655528	0.162292	0.759814	0.00107898709207025	0.6233306834357	0.718372718858133	0.300371377863526	0.185469660519468	0.306239458446367	0.974040318963384	NA	0.613274
s__Coprobacter_fastidiosus	1202	75.2846	0.000462639	0.713377	0.0477029	0.0477029	-0.20683	0.302236	0.800258	0.0431408044051262	0.186466338140055	0.0884913230874885	0.0631647324908646	0.661498535586778	0.104318970544756	0.0740448780684896	NA	0.855461
s__Bacteroides_vulgatus	1262	28.0279	0.20032	0.516096	0.0474729	0.0474729	-0.0958113	0.190757	0.846833	0.00407095565510373	0.677387347281859	0.973603394859233	0.0870642723037748	0.0831727972607217	0.581636298859285	0.517081754973232	0.0161068918224465	0.703546
s__Veillonella_denticariosi	1142	0	0.733317	0.442109	0.0458337	0.0458337	-0.0710385	0.162706	0.940258	0.257348456908861	0.965514109005429	0.382733088885226	NA	1	0.30544804067441	0.461829615142004	NA	0.646933
s__Pseudopropionibacterium_propionicum	1098	54.3651	0.0563766	0.659612	0.0449513	0.0449513	-0.155079	0.244981	0.0600797	0.299183634260258	0.327088059290864	0.382733088885226	0.057206909967281	NA	0.142507979464399	0.606170877454623	NA	0.80946
s__Ruminococcus_sp_CAG_579	1202	14.1912	0.285806	0.517357	0.0431254	0.0431254	-0.0874289	0.17368	0.342446	0.810847625316747	0.889955483390074	0.382733088885226	0.623855475563343	0.784626904021629	0.30544804067441	0.259177902580758	NA	0.703605
s__Eubacterium_siraeum	1262	0	0.520168	0.447552	0.0430879	0.0430879	-0.0681043	0.15428	0.390191	0.0522118650067143	0.771009708161906	0.963021783353728	0.129109815801628	0.45859704443253	0.49316743313764	0.510404472512411	0.753887538403696	0.648334
s__Raoultella_ornithinolytica	1202	25.8667	0.169216	0.567895	0.0420318	0.0420318	-0.102204	0.186268	0.920402	0.222292708513491	0.942555325113781	0.110244420486825	0.467972190562122	0.159309393367584	0.0706043414452477	0.125456976028849	NA	0.740956
s__Collinsella_intestinalis	1262	0	0.810292	0.464103	0.0415107	0.0415107	-0.0696197	0.152641	0.176804	0.673186099553791	0.0458462496351136	0.616627047655471	0.154821224558469	0.566542441572166	0.00695172018501817	0.00164081208404083	0.311813620962406	0.660718
s__Bacteroides_sp_D2	1202	0.00543947	0.357041	0.485003	0.0406124	0.0406124	-0.0733804	0.154605	0.253362	0.839165691875659	0.0739183600717002	0.503017346158705	0.10045934547754	0.641230135495246	0.378885143376706	0.229986301601523	NA	0.680416
s__Bacteroides_uniformis	1262	0.010233	0.410356	0.474871	0.0405522	0.0405522	-0.0706757	0.15178	0.585483	0.102471585845063	0.949855371086593	0.216834204173253	0.448215850446342	0.302804408862632	0.466065794808215	0.947637203604728	0.0749702230429448	0.671089
s__Prevotella_sp_CAG_1031	1202	27.0425	0.185464	0.586482	0.0404171	0.0404171	-0.105216	0.186051	0.120399	0.395597366997888	0.0245079543744726	0.126293592932509	0.367053313162153	1	0.0793714554677947	0.471728769529743	NA	0.753304
s__Lactobacillus_johnsonii	1028	19.819	0.311568	0.595191	0.0403057	0.0403057	-0.108374	0.188985	0.940258	0.0968267206164576	NA	NA	0.367053313162153	0.326706554868585	0.344783405090221	0.10959749056521	NA	0.762795
s__Paraprevotella_xylaniphila	1262	45.4268	0.0768278	0.637866	0.0401514	0.0401514	-0.127042	0.207345	0.760021	0.0670641059090902	0.196509547425634	0.776207068663651	0.150548080898158	0.613743045920722	0.666099115416402	0.0652701344429202	0.0736671745359872	0.788763
s__Eggerthella_lenta	1262	41.7663	0.111173	0.630704	0.0395976	0.0395976	-0.121842	0.201038	0.53647	0.414488341662042	0.0112908159744947	0.754384287711958	0.386587278883581	0.729190124591552	0.392388280797516	0.31611856887329	0.321449156766352	0.787359
s__Citrobacter_portucalensis	1137	0.0232527	0.292267	0.511993	0.0392447	0.0392447	-0.0780557	0.156545	0.865555	0.883719264720897	0.549907447374326	0.382733088885226	0.190122358664165	0.0434317101015428	NA	0.816291342977965	0.0815229720841182	0.701369
s__Slackia_isoflavoniconvertens	1262	32.9044	0.135421	0.606638	0.0392304	0.0392304	-0.110106	0.188567	0.984029	0.453827274631488	0.0957402835112904	0.137653115617902	0.100779202162088	0.416049710877734	0.0693343206895002	0.0579946292474356	0.170899094141242	0.772328
s__Succinatimonas_hippei	1202	40.0534	0.115969	0.638652	0.0390138	0.0390138	-0.123823	0.201851	0.893668	0.257348456908861	0.385624524831542	0.294893983818087	0.680390335586726	1	0.614780365163334	0.000431427749410461	NA	0.788763
s__Prevotella_timonensis	1216	0.132548	0.634302	0.50612	0.0384692	0.0384692	-0.0749302	0.151868	0.940258	0.724785322342108	0.454169992837528	NA	0.517425235634523	0.0822667000855503	0.151662535040316	0.601652569532864	0.160802121440221	0.696518
s__Megasphaera_sp_DISK_18	1262	0	0.522169	0.503259	0.0379737	0.0379737	-0.0732159	0.149163	0.652181	0.222292708513491	0.409500109565937	0.20080235530146	0.680390335586726	0.949514011746167	0.30544804067441	0.470917685490786	0.0815229720841182	0.694233
s__Lactococcus_garvieae	1156	0	0.598547	0.525655	0.0376163	0.0376163	-0.0785521	0.153785	0.810198	0.456197191291296	0.0881280298917245	NA	0.517425235634523	0.326706554868585	0.508166197673916	0.606170877454623	NA	0.70988
s__Clostridium_sp_CAG_964	1134	0.017879	0.392633	0.529474	0.0376103	0.0376103	-0.0796191	0.15484	0.652181	0.222292708513491	NA	0.294893983818087	0.680390335586726	0.684295353643657	0.142507979464399	0.860098805103847	0.0832283486620763	0.711025
s__Actinomyces_oris	1202	74.3135	0.00181836	0.773376	0.0366991	0.0366991	-0.213087	0.286485	0.019507	0.24036351823078	0.195660209487929	0.126293592932509	0.030005957712441	0.516394300214702	0.244874422092237	0.0382931690221771	NA	0.895553
s__Enterococcus_hirae	684	0	0.474859	0.636466	0.0364179	0.0364179	-0.1146	0.187435	0.921916	0.222292708513491	0.237107019143383	0.382733088885226	0.367053313162153	0.326706554868585	0.972793417410595	NA	NA	0.788763
s__Pseudoflavonifractor_sp_An85	1202	0	0.432649	0.535014	0.036073	0.036073	-0.0778941	0.15004	0.50581	0.871306907540026	0.95402994866509	0.294893983818087	0.41086734497355	0.301062450182929	0.731431236933202	0.102788483696839	NA	0.712531
s__Anaerofilum_sp_An201	1202	20.0746	0.213471	0.609527	0.0357916	0.0357916	-0.101556	0.17314	0.0579192	0.406679354084927	0.570351268442267	0.110244420486825	0.118525155026048	1	0.16828874168212	0.306544788649206	NA	0.774301
s__Citrobacter_braakii	1262	23.7764	0.22259	0.617938	0.0351968	0.0351968	-0.103111	0.173505	0.138117	0.00176517507741031	0.767729394591155	0.642882124605385	0.623855475563343	0.582777617292422	0.176109350604431	0.160523741245762	0.0815229720841182	0.779843
s__Bacteroides_faecis	1262	0	0.613184	0.537878	0.034941	0.034941	-0.0762284	0.146111	0.845889	0.034242849011004	0.344451581136471	0.347940866918459	0.691072728384803	0.876009614650482	0.839840802236894	0.330793134561513	0.0815229720841182	0.713353
s__Sharpea_azabuensis	1262	1.86778	0.339493	0.557236	0.0339879	0.0339879	-0.0795052	0.147481	0.612517	0.783789411454452	0.193555279153961	0.294893983818087	0.873049440682304	0.336254852222405	0.0468367322915516	0.896328907994216	1	0.732005
s__Alistipes_inops	1262	37.3907	0.117566	0.671001	0.0336459	0.0336459	-0.121601	0.188892	0.0734152	0.229116148758375	0.810244484923908	0.182660178462048	0.422171456872078	0.370669010925822	0.87407088910614	0.0964720801352877	0.333710695743566	0.818225
s__Victivallis_vadensis	1262	0	0.49918	0.57716	0.0316297	0.0316297	-0.079561	0.14282	0.489023	0.267687365892904	0.21013441208994	0.292998019398169	0.371142090074762	0.333912849885325	0.155997817798214	0.0736773533823054	0.0933912960727462	0.745954
s__Lactobacillus_curvatus	1202	34.5501	0.131456	0.692994	0.031285	0.031285	-0.12403	0.1866	0.346149	0.0958604996240165	0.409500109565937	0.294893983818087	0.800660257999651	0.159309393367584	0.508166197673916	0.45138474740672	NA	0.836972
s__Bacteroides_finegoldii	1262	3.76493	0.535051	0.603878	0.0306204	0.0306204	-0.0850526	0.146293	0.460982	0.636246477594105	0.316822189931154	0.508137483133346	0.849006884592214	0.980593527488369	0.920226697547808	0.0475494787993055	0.333710695743566	0.770511
s__Clostridium_sp_chh4_2	1096	27.0507	0.307759	0.693206	0.0303189	0.0303189	-0.120309	0.180947	0.920402	0.257348456908861	0.55630917622049	NA	NA	0.567488824907502	0.30544804067441	0.278809685504936	NA	0.836972
s__Alistipes_timonensis	1262	9.35773	0.576323	0.628946	0.0300845	0.0300845	-0.0919419	0.152111	0.777453	0.683957011980281	0.430896399767813	0.950241615743525	0.759871866466232	0.11766141068225	0.290994359586341	0.854363765771989	0.333710695743566	0.786863
s__Neisseria_sicca	1028	29.8529	0.206223	0.718823	0.0299756	0.0299756	-0.133207	0.193158		0.257348456908861	0.09341207495122	0.382733088885226	NA	0.567488824907502	0.344783405090221	0.281256037445008	NA	0.85877
s__Firmicutes_bacterium_CAG_424	1096	0.0116564	0.37135	0.623483	0.0298995	0.0298995	-0.0894723	0.149271	0.529967	0.781299539836952	0.09341207495122	NA	NA	0.843920602362658	0.508166197673916	0.61716026840089	NA	0.781721
s__Bacteroides_faecichinchillae	1216	55.0512	0.0311434	0.756973	0.0295794	0.0295794	-0.157763	0.216921	0.711005	0.222292708513491	0.869957088600685	NA	0.300371377863526	0.398316391313845	0.580065003180437	0.457136740115591	0.00129701018862667	0.886293
s__Streptococcus_sp_HMSC034E03	1202	0.0060792	0.4232	0.612812	0.029428	0.029428	-0.0845457	0.143402	0.637482	0.758035332074205	0.313061215827625	0.20080235530146	0.961999755373719	0.159309393367584	0.30544804067441	0.317015352742777	NA	0.776767
s__Bifidobacterium_moukalabense	1202	0	0.615196	0.615719	0.0291747	0.0291747	-0.0847488	0.143098	0.893668	0.758269853422962	0.240508660367924	0.382733088885226	0.924085656273987	0.567488824907502	0.142507979464399	0.528703856577399	NA	0.778743
s__Absiella_dolichum	1202	0	0.699161	0.620897	0.028743	0.028743	-0.0851624	0.142648	0.132618	0.671689905853644	0.706057097496483	0.900676560163781	0.567424071057996	0.708558012636724	0.0940473887519653	0.180413659470889	NA	0.781721
s__Streptococcus_sp_M334	1156	54.0725	0.0470159	0.774825	0.0276751	0.0276751	-0.161937	0.217287	0.0600797	0.469878397466201	0.409500109565937	NA	0.961999755373719	0.0231385456724483	0.176109350604431	0.0921450262033511	NA	0.895553
s__Campylobacter_hominis	1156	0	0.784237	0.649449	0.0269276	0.0269276	-0.0891865	0.143042	0.652181	0.196219874689956	0.781866796271056	NA	NA	0.948689227158617	0.743296390838981	0.260476759742972	0.333710695743566	0.800387
s__Neisseria_flavescens	1202	2.8079	0.183667	0.657142	0.0265976	0.0265976	-0.0908497	0.144045	0.652181	0.840562690057685	0.0598905584737729	0.0185314666992243	NA	0.642110127970343	0.30544804067441	0.14604044881959	0.160802121440221	0.808145
s__Firmicutes_bacterium_CAG_534	1028	31.6914	0.201909	0.75411	0.026352	0.026352	-0.138543	0.191247	0.521877	0.766640182603409	NA	NA	NA	0.0434317101015428	0.142507979464399	0.379225528623955	0.179021535026396	0.886293
s__Bacteroides_sp_OM08_11	1202	0	0.514395	0.667637	0.0249628	0.0249628	-0.0889797	0.138905	0.473326	0.257348456908861	0.220764879113764	0.382733088885226	0.680390335586726	1	0.972793417410595	0.810345642249783	NA	0.815844
s__Gemmiger_sp_An194	967	0.00222025	0.371348	0.720595	0.0231502	0.0231502	-0.10371	0.150011	0.291319	NA	NA	0.294893983818087	0.300371377863526	0.326706554868585	0.30544804067441	0.251651294303177	NA	0.85877
s__Bifidobacterium_saeculare	556	0	0.445798	0.788092	0.0229226	0.0229226	-0.144225	0.19007	0.860153	0.12679099894931	NA	0.382733088885226	0.300371377863526	0.326706554868585	0.142507979464399	NA	NA	0.903016
s__Clostridium_sp_CAG_510	1031	23.1131	0.180561	0.770601	0.0227886	0.0227886	-0.130389	0.175966	0.77319	0.257348456908861	0.520893320084	NA	NA	0.0368248775311952	NA	0.718762247653702	0.00383001139886011	0.895553
s__Coprobacter_secundus	1262	0.0108796	0.467841	0.693615	0.022353	0.022353	-0.0888558	0.133562	0.49337	0.306544180782041	0.591286609847617	1	0.710707250233408	0.354060015874275	0.41182460059308	0.84644935906345	0.160524036107338	0.836972
s__Lawsonella_clevelandensis	1028	0	0.683464	0.731122	0.021604	0.021604	-0.101618	0.144826		0.861589925299449	0.240508660367924	0.642882124605385	NA	1	0.520187451723909	0.606170877454623	NA	0.86596
s__Phascolarctobacterium_succinatutens	1262	7.92678	0.503533	0.735761	0.0207369	0.0207369	-0.0996987	0.141173	0.296656	0.609628755938552	0.705803880045241	0.253178107353756	0.215898843569138	0.2950172798574	0.609140770959486	0.0767525000296882	0.930211378136971	0.869672
s__Corynebacterium_durum	1156	0.00656761	0.276177	0.728633	0.0205777	0.0205777	-0.0956702	0.136826	0.628703	0.30004127068492	0.730734128231025	NA	0.159502259991251	0.326706554868585	0.508166197673916	0.98639339666362	NA	0.864784
s__Dorea_longicatena	1262	30.6692	0.187499	0.788967	0.0199932	0.0199932	-0.126413	0.1664	0.357272	0.927297172134857	0.945928881874327	0.876484707732315	0.795244628538425	0.388651705664841	0.600386245178682	0.00362820668008872	0.00507821122002851	0.903016
s__Ruminococcus_sp_CAG_563	1216	8.29638	0.378203	0.755021	0.0195517	0.0195517	-0.103261	0.142364	0.906501	0.257348456908861	0.796076638504789	NA	0.190122358664165	0.174090812483351	0.35981396064216	0.798268507420226	0.148116431338638	0.886293
s__Streptococcus_sp_SK643	1156	48.2598	0.0654354	0.832207	0.0192715	0.0192715	-0.159004	0.197547	0.360436	0.257348456908861	0.240508660367924	NA	0.300371377863526	1	0.30544804067441	0.00978037951440821	NA	0.926813
s__Enterobacter_mori	1262	0.012003	0.357002	0.759022	0.01741	0.01741	-0.0938249	0.128645	0.291319	0.222292708513491	0.370809623010966	0.382733088885226	0.367053313162153	0.326706554868585	0.30544804067441	0.679888473213254	0.575985735365492	0.886293
s__Eubacterium_dolichum_CAG_375	1202	0	0.820461	0.776249	0.0165129	0.0165129	-0.0973629	0.130389	0.132618	0.65436424343923	0.988501519612401	0.900676560163781	0.546668308132094	0.693740713707191	0.253745284229437	0.147246908048158	NA	0.895553
s__Streptococcus_parasanguinis	1262	0.0193801	0.431268	0.774808	0.0162354	0.0162354	-0.0949906	0.127461	0.308519	0.17012406405651	0.913224102749745	0.628844343070268	0.56817109227204	0.204792411795328	0.577586815814126	0.958460835237067	0.000854700370365604	0.895553
s__Hungatella_effluvii	998	0	0.466256	0.813681	0.0150468	0.0150468	-0.110085	0.140179		0.861589925299449	0.706057097496483	NA	0.367053313162153	NA	0.0706043414452477	0.864427714590876	0.333710695743566	0.914995
s__Gardnerella_vaginalis	1031	34.0578	0.190409	0.861149	0.0150321	0.0150321	-0.15341	0.183474	0.189672	0.840562690057685	0.09341207495122	NA	0.367053313162153	1	NA	0.101323710054809	NA	0.944486
s__Firmicutes_bacterium_CAG_110	1262	65.7248	0.0105056	0.89059	0.0148214	0.0148214	-0.196357	0.226	0.639049	0.884770738075515	0.87397614660583	0.361020176022028	0.0878517290124547	0.0144546714959759	0.504512597587386	0.66442870864774	0.0238205512577427	0.95762
s__Streptococcus_salivarius_CAG_79	1202	0	0.864919	0.801034	0.0146388	0.0146388	-0.0992124	0.12849	0.498976	0.409277665600397	0.090418698223585	0.503017346158705	NA	0.642110127970343	0.920298529732366	0.596137609427543	0.597189314622896	0.911413
s__Prevotella_disiens	1202	0.0245942	0.540408	0.804982	0.014357	0.014357	-0.0996105	0.128324	0.242472	0.222292708513491	0.341516737388611	0.20080235530146	0.133408778285585	0.642110127970343	0.872965985710809	0.611251054564814	NA	0.912313
s__Leuconostoc_garlicum	970	37.1424	0.130174	0.880934	0.0140223	0.0140223	-0.169462	0.197506	0.637482	NA	0.742148805634006	0.294893983818087	0.057206909967281	0.326706554868585	NA	0.051771742859829	NA	0.956826
s__Megamonas_hypermegale	1262	0	0.81613	0.813561	0.0133703	0.0133703	-0.0977473	0.124488	0.154486	0.650045444812599	0.851677959821621	0.900676560163781	0.485619682874008	0.658808711542631	0.281125736216025	0.050250102220824	0.907342195336634	0.914995
s__Bacteroides_massiliensis	1262	19.3413	0.24728	0.849285	0.0129194	0.0129194	-0.12033	0.146169	0.918068	0.00290658467792412	0.0241472032688285	0.770051876985431	0.114839946342713	0.430502001205458	0.0547262386018778	0.694420631682961	1	0.936526
s__Firmicutes_bacterium_CAG_170	1262	14.6796	0.239464	0.850416	0.0123235	0.0123235	-0.115752	0.140399	0.634398	0.526154159091072	0.664739906341056	0.08404607453051	0.0675621599635643	0.077002413508079	0.979206209063088	0.460137426289133	0.192448371996316	0.936526
s__Faecalicatena_orotica	1216	0	0.642727	0.831147	0.0123186	0.0123186	-0.100911	0.125548	0.667016	0.861589925299449	0.520893320084	NA	0.924085656273987	1	0.142507979464399	0.281874897223095	0.333710695743566	0.926813
s__Roseburia_sp_CAG_182	1262	51.2747	0.0553464	0.891635	0.0123117	0.0123117	-0.164811	0.189435	0.869178	0.37871050034361	0.184854552872298	0.382733088885226	0.841999654334459	0.189560284201391	0.153123717502925	0.40916288542663	1	0.95762
s__Clostridium_sp_CAG_590	570	0	0.441193	0.883988	0.0122845	0.0122845	-0.152723	0.177292	0.486059	0.202929390403277	NA	NA	0.367053313162153	0.159309393367584	0.614780365163334	NA	0.333710695743566	0.956826
s__Monoglobus_pectinilyticus	1202	0.00367199	0.331993	0.841827	0.011606	0.011606	-0.102384	0.125596	0.622663	0.346996657882276	0.193907433757176	0.572411029865748	0.1243202815407	0.0949757726565153	0.133896195577209	0.263113988812032	NA	0.933927
s__Clostridium_perfringens	1202	11.5696	0.309428	0.865774	0.0110004	0.0110004	-0.116555	0.138556	0.916351	0.138123556527437	0.418907995357111	0.294893983818087	0.234020935795725	0.979719771065086	0.0358290822760981	0.426955299133601	NA	0.946784
s__Veillonella_infantium	1262	39.2297	0.111751	0.894165	0.0107131	0.0107131	-0.147119	0.168545	0.492939	0.0638150913539255	0.0378031496132238	0.226325015288238	0.153913823116961	0.748907198783333	0.612287851681268	0.598559405985198	0.677067113693961	0.95762
s__Megamonas_funiformis	1262	0.000107996	0.351022	0.850651	0.0106848	0.0106848	-0.100537	0.121907	0.258	0.401368891848538	0.475062422102248	0.382733088885226	0.450720449425489	0.234061025351376	0.972793417410595	0.0154177985063571	0.978174402974246	0.936526
s__Catenibacterium_mitsuokai	1262	0	0.790132	0.856058	0.0102842	0.0102842	-0.100837	0.121405	0.781412	0.0790784734618792	0.133614639291316	0.900676560163781	0.349329308705518	0.342165531165995	0.470912906123922	0.13961665983465	0.542989434415656	0.940688
s__Bacteroides_intestinalis	1262	79.7036	0.000722578	0.951356	0.00848647	0.00848647	-0.264173	0.281146	0.478066	0.0426775772830287	0.39902845614481	0.0127580470473158	0.390035303670528	0.0397103674964907	0.417106983952455	0.163888388746158	1.46007203695554e-05	0.982189
s__Bacteroides_sp_CAG_144	1074	42.6976	0.112092	0.927038	0.00840472	0.00840472	-0.171485	0.188294	0.423492	0.136036225679209	NA	0.738507122289758	0.305583903891205	0.856205247994744	0.781381325275495	0.0662527818486457	NA	0.973389
s__Clostridium_saccharolyticum	1202	0.00271181	0.422001	0.8876	0.00821842	0.00821842	-0.105746	0.122182	0.687285	0.00595377583633976	0.389746891861683	0.850574118920262	0.346580650521155	0.223673892481061	0.711560816895473	0.803606566088065	NA	0.95762
s__Klebsiella_pneumoniae	1262	0	0.67011	0.902721	0.00693129	0.00693129	-0.104217	0.118079	0.188245	0.110789659471501	0.998057559604042	0.578721133384534	0.306184988246199	0.594340564575866	0.624487777620657	0.658596526800794	0.151458142348717	0.960907
s__Clostridium_sp_7_2_43FAA	1096	21.0421	0.287188	0.931643	0.00627496	0.00627496	-0.137103	0.149653	0.130685	0.861589925299449	0.240508660367924	NA	NA	0.326706554868585	0.30544804067441	0.706388962028017	NA	0.973389
s__Veillonella_dispar	1262	26.2283	0.168324	0.930798	0.00625621	0.00625621	-0.134943	0.147456	0.364536	0.0771844399302671	0.0959741290252754	0.808213374234433	0.120747514825775	0.453222295701454	0.602996196670788	0.522720485498076	0.940956771375728	0.973389
s__Actinomyces_johnsonii	1202	24.5761	0.174539	0.932873	0.00613137	0.00613137	-0.13654	0.148803	0.0427496	0.987149135315431	0.237107019143383	0.294893983818087	0.147589817731088	0.319671645109629	0.560427532345829	0.952232652539679	NA	0.973389
s__Blautia_obeum	1262	49.9944	0.0332375	0.952631	0.00529289	0.00529289	-0.169342	0.179928	0.274108	0.475092406212914	0.85033745166169	0.728804552694831	0.664292267431577	0.80710732433368	0.312222327460879	0.0444801236229109	0.102327177242547	0.982189
s__Lactococcus_piscium	1049	0.000650426	0.387021	0.932971	0.00523233	0.00523233	-0.116698	0.127162	0.360436	NA	0.730050519373527	NA	0.258157660487048	0.567488824907502	0.142507979464399	0.798268507420226	NA	0.973389
s__Enterococcus_faecium	1262	38.141	0.0894709	0.953908	0.00460917	0.00460917	-0.151685	0.160903	0.0439193	0.0320154186742764	0.640523620965377	0.503017346158705	0.927178099053204	0.654721448601617	0.722885073646015	0.0672746537812525	0.00558431205717215	0.982189
s__Lactobacillus_oris	1074	41.8769	0.117975	0.961061	0.00444613	0.00444613	-0.174042	0.182934	0.181395	0.724785322342108	NA	0.294893983818087	0.769023572053263	0.159309393367584	0.0706043414452477	0.675291694099527	NA	0.98558
s__Porphyromonas_sp_HMSC065F10	1142	26.5425	0.227738	0.955	0.00427407	0.00427407	-0.144179	0.152727	0.291319	0.222292708513491	0.165195276679304	0.382733088885226	NA	0.326706554868585	0.176109350604431	0.518493013893228	NA	0.982189
s__Eubacterium_ramulus	1262	0	0.788546	0.943515	0.0040171	0.0040171	-0.107105	0.11514	0.0641478	0.723681424153541	0.675122398714884	0.400078556411561	0.247114119261766	0.581135778509683	0.992098217147018	0.315814145609161	0.654724099448684	0.980848
s__Streptococcus_sp_F0442	1202	37.2578	0.140894	0.963825	0.0036784	0.0036784	-0.155283	0.16264	0.256935	0.105795166187831	0.105682071127676	0.416730277827227	0.708387628236428	0.666058414877548	0.0480197765126528	0.56599640530362	NA	0.98558
s__Lactobacillus_vaginalis	1262	21.7909	0.121685	0.963729	0.00315899	0.00315899	-0.132993	0.139311	0.226756	0.172201738714556	0.754311142553046	0.900676560163781	0.46798986842757	1	0.344783405090221	0.286232770587469	0.0110350863369353	0.98558
s__Leuconostoc_citreum	1049	21.1989	0.267039	0.969886	0.00285959	0.00285959	-0.145603	0.151322	0.189672	NA	0.510526429285527	NA	0.300371377863526	0.326706554868585	0.344783405090221	0.103527160371415	NA	0.986961
s__Ruminococcus_sp_CAG_330	1262	0.0165839	0.389565	0.966996	0.00234815	0.00234815	-0.108884	0.11358	0.625593	0.455559101043444	0.403222977686226	0.294893983818087	0.41086734497355	0.976627801915565	0.0294097704618912	0.89880553563489	0.021577191872833	0.985757
s__Bacteroides_galacturonicus	1262	43.3605	0.0984447	0.982382	0.00184619	0.00184619	-0.162015	0.165708	0.520834	0.0106270087639387	0.284123652788455	0.70104841568668	0.692114014628273	0.725086564616363	0.425659132247625	0.0900332422411483	0.333710695743566	0.987508
s__Pediococcus_pentosaceus	638	0	0.552252	0.982304	0.00176871	0.00176871	-0.154522	0.158059	0.498976	0.0797883853157373	0.409500109565937	NA	0.924085656273987	0.326706554868585	0.600288322839462	NA	NA	0.987508
s__Clostridium_disporicum	1202	0	0.850071	0.979192	0.00151522	0.00151522	-0.112351	0.115381	0.405323	0.231851533637425	0.134343546324622	0.950241615743525	0.224151002521612	0.615651138626891	0.467636613853363	0.320617681732758	NA	0.987508
s__Lactonifactor_longoviformis	1156	32.9952	0.178095	0.985903	0.00139779	0.00139779	-0.15365	0.156446	0.336602	0.666408698728389	0.59966432186087	NA	0.102444699958295	0.947248671503941	0.0727544821352107	0.548415398969855	NA	0.987611
s__Bacteroides_stercorirosoris	1262	0	0.653567	0.98476	0.00108325	0.00108325	-0.110069	0.112235	0.257496	0.395597366997888	0.600363562337968	0.294893983818087	0.367053313162153	0.0544273830880131	0.75432925252191	0.132957773201994	0.333710695743566	0.987611
s__Butyrivibrio_sp_CAG_318	1134	0.00591016	0.509611	0.993562	0.000482369	0.000482369	-0.116692	0.117656	0.851408	0.921898515577537	NA	0.806567483264269	0.057206909967281	0.0886535905485464	0.930896733767444	0.419310622183536	0.0450592511178984	0.993562
s__Bacteroides_coprocola	1262	0.00737336	0.385802	0.981966	-0.00128271	-0.00128271	-0.112503	0.109937	0.578299	0.772560690243793	0.682313400064749	0.140509260319028	0.603251824407632	0.0773262242020949	0.00360616918159178	0.126096786646405	0.750736548032812	0.987508
s__Megamonas_funiformis_CAG_377	1262	7.1814	0.289668	0.978	-0.00168389	-0.00168389	-0.121363	0.117995	0.366463	0.181470426738987	0.482160356659607	0.382733088885226	0.190122358664165	0.0881287890019973	0.972793417410595	0.931772559993763	0.402182701913614	0.987508
s__Rothia_aeria	984	5.15902	0.303493	0.9801	-0.00170357	-0.00170357	-0.135566	0.132158		0.796037025374034	0.799757477289074	0.382733088885226	0.133408778285585	NA	0.142507979464399	0.968722373988069	NA	0.987508
s__Candidatus_Gastranaerophilales_bacterium	1074	26.5571	0.22409	0.977472	-0.00224004	-0.00224004	-0.15772	0.15324	0.342446	0.428650354072069	NA	0.20080235530146	0.680390335586726	0.137693856032691	0.838353182532828	0.125897358862131	NA	0.987508
s__Parabacteroides_johnsonii	1262	30.6658	0.181006	0.965118	-0.00326861	-0.00326861	-0.149762	0.143225	0.742567	0.144779417445154	0.891716858727801	0.324285303744739	0.589390461921429	0.0165132991582126	0.0304787553058563	0.0214512417192053	0.434841208209599	0.98558
s__Streptococcus_macedonicus	1158	3.51695	0.33905	0.952105	-0.00370178	-0.00370178	-0.124497	0.117094	0.291319	0.395597366997888	0.162629427860621	0.382733088885226	0.517425235634523	NA	0.30544804067441	0.471728769529743	0.333710695743566	0.982189
s__Weissella_viridescens	1096	45.2661	0.106404	0.951199	-0.00552903	-0.00552903	-0.182598	0.171539	0.189672	0.395597366997888	0.09341207495122	NA	NA	0.326706554868585	0.142507979464399	0.259177902580758	NA	0.982189
s__Bacteroides_caecimuris	1202	0.000807491	0.439864	0.917757	-0.00600311	-0.00600311	-0.119948	0.107942	0.360436	0.257348456908861	0.409500109565937	0.294893983818087	NA	0.326706554868585	0.344783405090221	0.860098805103847	0.333710695743566	0.967999
s__Butyricicoccus_pullicaecorum	1262	45.4732	0.0586658	0.940037	-0.00641392	-0.00641392	-0.173531	0.160703	0.822363	0.0108237206079642	0.411380146903973	0.900676560163781	0.0623926133465509	0.222503187665244	0.344783405090221	0.003697084446554	0.333710695743566	0.978994
s__Lactococcus_petauri	1216	0	0.746174	0.910772	-0.00647286	-0.00647286	-0.119681	0.106735	0.105545	0.432840455934659	0.0534374568902129	NA	0.492365778806135	1	0.95467131576096	0.716709030695173	0.333710695743566	0.96592
s__Blautia_hansenii	1202	9.2183	0.435783	0.916619	-0.00666731	-0.00666731	-0.131485	0.11815	0.906501	0.0797883853157373	0.696478449930322	0.294893983818087	0.300371377863526	0.563991994725501	0.520187451723909	0.257864244219494	NA	0.967999
s__Leuconostoc_gelidum	1156	0.00990597	0.301591	0.894662	-0.00785259	-0.00785259	-0.124091	0.108385	0.883277	0.257348456908861	0.09341207495122	NA	0.651872780912102	0.159309393367584	0.142507979464399	0.864427714590876	NA	0.95762
s__Streptococcus_mutans	1202	0	0.631218	0.891599	-0.0079207	-0.0079207	-0.121835	0.105993	0.110072	0.269417038435954	0.614768750385412	0.950241615743525	0.548162987752975	0.786849652948667	0.146682988646832	0.425042415273447	NA	0.95762
s__Bacteroides_clarus	1262	50.1961	0.044366	0.926871	-0.00820905	-0.00820905	-0.18351	0.167092	0.783871	0.952040390958533	0.0223806290136347	0.723935254896501	0.959007879241953	0.737138657720306	0.0557355375442917	0.537408923951046	0.0199601395011567	0.973389
s__Parabacteroides_sp_CAG_409	1262	24.2263	0.261029	0.901356	-0.00877469	-0.00877469	-0.147526	0.129976	0.21673	0.0797883853157373	0.0444874991417284	0.902559835224621	0.503602842145237	0.496509977046461	0.367844034380481	0.241979479343332	0.570312769684932	0.960907
s__Massiliomicrobiota_timonensis	1156	0	0.638838	0.871985	-0.00954927	-0.00954927	-0.1257	0.106601	0.644111	0.369403022329107	0.203256359493978	NA	0.797162773496487	0.208282689627899	0.488937919185359	0.428410989755069	NA	0.949581
s__Olsenella_scatoligenes	1262	57.6197	0.0265451	0.913551	-0.0105301	-0.0105301	-0.200642	0.179582	0.0864321	0.894471287949147	0.135021270552462	0.83033987136274	0.562688988090469	0.14846398321797	3.21592118528784e-06	0.393576298494409	0.0709509156076784	0.967093
s__Blautia_sp_CAG_257	1202	45.8636	0.0845499	0.901763	-0.0108458	-0.0108458	-0.183062	0.161371	0.185895	0.09378847512567	0.0820728219514183	0.588326994308833	0.152076917460183	0.505468667764875	0.315923652145727	0.352227911954941	NA	0.960907
s__Ruminococcus_bromii	1262	35.47	0.152823	0.882722	-0.0114852	-0.0114852	-0.164079	0.141108	0.0124192	0.283315930670583	0.782735140742851	0.245092718490303	0.576514256903084	0.372886434077356	0.647412637291177	0.699400335436508	0.23330083321266	0.956826
s__Lactobacillus_plantarum	1156	56.6556	0.0401136	0.90753	-0.0115772	-0.0115772	-0.206928	0.183774	0.00666118	0.251740774744855	0.09341207495122	NA	0.199563174032434	1	0.151662535040316	0.30351762133686	NA	0.964251
s__Bacteroides_plebeius	1262	26.5806	0.261793	0.86652	-0.0121329	-0.0121329	-0.153613	0.129348	0.302765	0.0433113643146662	0.323436734822442	0.725278100790168	0.780777422865592	0.968453555489072	0.0296376111473593	0.00126751569389031	0.152938616501399	0.946784
s__Fusobacterium_sp_CAG_439	1074	14.0878	0.253628	0.848887	-0.0135309	-0.0135309	-0.152716	0.125654	0.291319	0.278357978583443	NA	0.20080235530146	0.492365778806135	0.326706554868585	0.307088069686604	0.449043532474837	NA	0.936526
s__Streptococcus_sp_oral_taxon_058	1156	4.54066	0.633686	0.808399	-0.0150224	-0.0150224	-0.136442	0.106398	0.353184	0.724785322342108	0.919644173215238	NA	0.924085656273987	0.159309393367584	0.972793417410595	0.297313818929135	NA	0.912607
s__Lactobacillus_iners	1096	0.0324498	0.303925	0.793881	-0.0159178	-0.0159178	-0.135326	0.103491	0.360436	0.10463176917841	0.240508660367924	NA	NA	0.326706554868585	0.972793417410595	0.143095067701773	NA	0.905056
s__Lactobacillus_fermentum	1262	2.27505	0.377702	0.782072	-0.0160843	-0.0160843	-0.130048	0.0978792	0.257496	0.670808011031672	0.795833750902299	0.0566228665813191	0.769023572053263	0.314163883666402	0.201467912753628	0.973753466617213	0.0419261675968508	0.898683
s__Anaerostipes_caccae	1156	26.7056	0.215224	0.827377	-0.0163587	-0.0163587	-0.163388	0.130671	0.901689	0.964869321889468	0.209433819389504	NA	0.147474265302701	0.763173977877069	0.520187451723909	0.987733788475528	NA	0.924998
s__Collinsella_aerofaciens	1262	66.8419	0.000545746	0.872366	-0.0175719	-0.0175719	-0.231949	0.196805	0.68668	0.765014978294269	0.0180016136284403	0.107051546610724	0.8068510938926	0.304222532263419	0.379060124089688	2.92879990161037e-05	0.455171605281325	0.949581
s__Bacteroides_sp_CAG_443	1156	23.9367	0.197025	0.793425	-0.0192041	-0.0192041	-0.162939	0.124531	0.144334	0.458446383440548	0.37559665835787	NA	0.057206909967281	1	0.151055761625719	0.125897358862131	NA	0.905056
s__Flavonifractor_sp_An100	1202	38.9369	0.131713	0.804093	-0.0204248	-0.0204248	-0.181809	0.140959	0.395882	0.141973642259788	0.862690201203946	0.894708948566272	0.858028376498492	0.0137843509913479	0.267747368819839	0.168092888505168	NA	0.912313
s__Oscillibacter_sp_PC13	1202	54.9033	0.046511	0.824908	-0.021352	-0.021352	-0.210512	0.167808	0.215009	0.254993731637878	0.730050519373527	0.735172232282521	0.385776676034587	0.0118674640478221	0.498558995834275	0.516905692311364	NA	0.924025
s__Clostridium_sp_CAG_632	570	17.056	0.299959	0.818106	-0.0214146	-0.0214146	-0.203915	0.161086	0.291319	0.840562690057685	NA	NA	0.300371377863526	0.326706554868585	0.176109350604431	NA	0.0218082365055811	0.918185
s__Eubacterium_sp_OM08_24	1262	0.00197893	0.452744	0.702327	-0.0216837	-0.0216837	-0.132886	0.0895183	0.895605	0.276408310499533	0.830612719130359	0.187292077239431	0.171561539811434	0.621736200714781	0.934274726263424	0.66571399885757	0.990017710840167	0.84396
s__Scardovia_inopinata	970	52.1946	0.0780288	0.837195	-0.0223492	-0.0223492	-0.235524	0.190826	0.0664762	0.182335374906208	NA	0.294893983818087	0.300371377863526	NA	0.142507979464399	0.379225528623955	NA	0.930575
s__Bifidobacterium_pullorum	684	2.12643	0.427633	0.771928	-0.022603	-0.022603	-0.175442	0.130236	0.848635	0.0654515222113408	0.240508660367924	0.382733088885226	0.300371377863526	0.326706554868585	0.0706043414452477	NA	NA	0.895553
s__Mitsuokella_multacida	1262	1.93692	0.263676	0.688847	-0.0232083	-0.0232083	-0.136808	0.0903911	0.174052	0.409277665600397	0.327979466319846	0.946043891150405	0.107580526205091	0.159309393367584	0.667155700426199	0.638092280885536	0.0110282852051936	0.836457
s__Hafnia_paralvei	1202	39.8755	0.0937911	0.779262	-0.0232798	-0.0232798	-0.186072	0.139512	0.450797	0.257348456908861	0.742148805634006	0.0566228665813191	0.0623926133465509	0.159309393367584	0.813717220896327	0.051204126288891	NA	0.897238
s__Alistipes_sp_An31A	1095	24.4336	0.248045	0.758041	-0.0236776	-0.0236776	-0.174324	0.126969	0.588564	NA	0.240508660367924	0.294893983818087	0.103502322708967	0.481729779367058	0.0358290822760981	0.723964117480846	NA	0.886293
s__Bifidobacterium_animalis	1098	53.1445	0.0639413	0.808162	-0.0244374	-0.0244374	-0.221706	0.172831	0.086415	0.00222796958336505	0.409500109565937	0.382733088885226	0.138881781598127	NA	0.0322945565783303	0.37013124927162	NA	0.912607
s__Hafnia_alvei	1142	22.5	0.378815	0.738016	-0.0244672	-0.0244672	-0.167837	0.118903	0.650621	0.741349956934042	0.240508660367924	0.294893983818087	NA	0.326706554868585	0.600288322839462	0.138310540820734	NA	0.870557
s__Weissella_cibaria	1216	0	0.658028	0.635798	-0.0273598	-0.0273598	-0.140591	0.0858714	0.40224	0.395597366997888	0.507352448976467	NA	0.961999755373719	0.0822667000855503	0.30544804067441	0.415911709242288	0.333710695743566	0.788763
s__Clostridium_paraputrificum	1202	31.2965	0.223599	0.71919	-0.0276644	-0.0276644	-0.178471	0.123142	0.318032	0.464239871095375	0.796076638504789	0.20080235530146	0.931734030178548	0.589072907169496	0.409611642165597	0.0352407215187815	NA	0.85877
s__Ileibacterium_valens	1202	0.000501433	0.235579	0.623269	-0.0285785	-0.0285785	-0.142606	0.0854488	0.312527	0.450812316830466	0.409500109565937	0.0127580470473158	0.513297027617047	1	0.607946102530144	0.523585666819481	NA	0.781721
s__Haemophilus_sp_HMSC71H05	1262	0	0.51135	0.581948	-0.0312319	-0.0312319	-0.142419	0.0799555	0.490286	0.507049629443674	0.0333008719043624	0.210254556046835	0.878943559377121	0.252196891975106	0.165837308814073	0.094314053236988	0.142122375591815	0.749144
s__Dialister_invisus	1262	0.00414425	0.290897	0.569218	-0.0323086	-0.0323086	-0.143558	0.0789408	0.527791	0.000217946258239473	0.922313736416096	0.621488330135293	0.898185281648782	0.759458093687953	0.750054311140395	0.382904685187115	0.0419261675968508	0.741009
s__Dorea_sp_CAG_317	1202	35.0573	0.171881	0.666891	-0.0342367	-0.0342367	-0.190138	0.121664	0.121793	0.064319949865688	0.495672895168909	0.503017346158705	0.558980752553329	0.628135012099533	0.0167103081372974	0.300330609802976	NA	0.815844
s__Klebsiella_variicola	1262	0	0.816393	0.529374	-0.0356601	-0.0356601	-0.146784	0.0754634	0.862501	0.659837622159841	0.952929515461683	0.830410679442844	0.306184988246199	0.850772134886383	0.819919865794118	0.290508185950729	0.437529416243334	0.711025
s__Bifidobacterium_gallinarum	684	0	0.442543	0.638636	-0.0361877	-0.0361877	-0.187222	0.114846	0.871702	0.119655374693787	0.240508660367924	0.382733088885226	0.300371377863526	0.326706554868585	0.0706043414452477	NA	NA	0.788763
s__Escherichia_marmotae	1098	5.95005	0.282803	0.574322	-0.0364431	-0.0364431	-0.163606	0.09072	0.872596	0.222292708513491	0.240508660367924	0.382733088885226	0.190122358664165	NA	0.142507979464399	0.278809685504936	NA	0.744301
s__Firmicutes_bacterium_CAG_95	1262	0.00623003	0.275396	0.512073	-0.037217	-0.037217	-0.148477	0.0740435	0.980384	0.158100540866802	0.124322977063491	0.679951745798953	0.201056052221537	0.0388009373029702	0.792137106654966	0.084682479538656	0.248376778704466	0.701369
s__Clostridium_spiroforme	1216	2.64972	0.506764	0.518878	-0.0383029	-0.0383029	-0.15468	0.0780746	0.149956	0.437561503957977	0.485847163161373	NA	0.907090662922179	0.576480472965068	0.36777036955441	0.800425689421534	0.333710695743566	0.704017
s__Actinomyces_sp_ICM47	1262	67.185	0.00523937	0.722626	-0.0390331	-0.0390331	-0.254565	0.176499	0.0613364	0.0279407441266685	0.136938744235856	0.596650967890699	0.672100486443967	0.105305573821122	0.0105674047721354	0.578029862401391	0.333710695743566	0.85942
s__Actinobaculum_sp_oral_taxon_183	1262	15.9167	0.292947	0.533764	-0.0410934	-0.0410934	-0.170525	0.0883384	0.0748429	0.966647377284848	0.156841848967833	0.126293592932509	0.0791647366022056	1	0.930896733767444	0.966943552927344	0.544026705656552	0.712507
s__Lactobacillus_sakei	1156	37.3488	0.153871	0.598304	-0.0432766	-0.0432766	-0.204275	0.117722	0.209168	0.858201140467286	0.09341207495122	NA	0.336327009555959	0.552394771173143	0.277429192017024	0.136743391752272	NA	0.765087
s__Oxalobacter_formigenes	1262	0	0.790409	0.440744	-0.0437145	-0.0437145	-0.15485	0.0674213	0.498976	0.449474578614661	0.649503727293815	0.382733088885226	0.300371377863526	0.967283415175128	0.633029255896725	0.952413345071167	0.333710695743566	0.646573
s__Firmicutes_bacterium_CAG_555	1088	0.0139641	0.251598	0.468707	-0.0442557	-0.0442557	-0.163965	0.0754536	0.940258	0.432840455934659	NA	NA	0.924085656273987	0.264797997690809	0.624226418968707	0.444381834489539	0.0419261675968508	0.665633
s__Streptococcus_infantarius	640	0	0.642157	0.578179	-0.0442947	-0.0442947	-0.200425	0.111836	0.360436	0.781299539836952	0.817624871403889	0.294893983818087	0.680390335586726	NA	0.520187451723909	NA	0.623707667356773	0.745954
s__Bifidobacterium_kashiwanohense	1028	0	0.747406	0.478472	-0.044481	-0.044481	-0.167486	0.0785237	0.242472	0.861589925299449	NA	NA	NA	0.310274946557178	0.351374217633546	0.970593788114525	0.468051098074256	0.672887
s__Bacteroides_ovatus	1262	70.7952	0.00137925	0.702297	-0.0445049	-0.0445049	-0.272718	0.183708	0.641125	0.00323530269628481	0.0750373956118786	0.205649242392039	0.0258991309817008	0.169067469710991	0.0246417657583229	0.0102964880963016	0.0234444259536435	0.84396
s__Lachnoclostridium_sp_An14	1074	0.0171854	0.339903	0.453299	-0.0461026	-0.0461026	-0.166594	0.0743885	0.189672	0.000779290788120466	NA	0.382733088885226	0.41086734497355	0.326706554868585	0.532353656910627	0.129904580394604	NA	0.651759
s__Bacteroides_dorei	1262	70.5579	0.00269498	0.684696	-0.0470973	-0.0470973	-0.274424	0.18023	0.791364	0.0429463818011095	0.0478086046497582	0.58001057779244	0.01619846494024	0.287651718593352	0.211152081564559	0.126831625170012	0.147069589625099	0.833167
s__Acidaminococcus_sp_CAG_542	1155	23.1658	0.204095	0.523836	-0.0472175	-0.0472175	-0.192398	0.0979634	0.0481933	NA	0.248768526834557	0.20080235530146	0.190122358664165	0.326706554868585	0.344783405090221	0.909065156321454	1	0.70908
s__Roseburia_inulinivorans	1262	0.0126127	0.411022	0.392489	-0.0485306	-0.0485306	-0.159765	0.0627041	0.785035	0.400771461185875	0.115256298015142	0.929587712322175	0.572945354154206	0.479917847930571	0.19115088042992	0.799394454853351	0.744866527817466	0.602312
s__Bacteroides_sp_CAG_462	1158	10.1142	0.264223	0.459844	-0.0486861	-0.0486861	-0.177793	0.0804203	0.189672	0.257348456908861	0.240508660367924	0.718372718858133	0.372983391596647	NA	0.142507979464399	0.444381834489539	0.333710695743566	0.656271
s__Blautia_sp_N6H1_15	1156	0	0.771644	0.401215	-0.049744	-0.049744	-0.165887	0.0663989	0.223656	0.870154188766184	0.691922251664166	NA	0.367053313162153	0.73852615215571	0.155861535131275	0.617258572853986	NA	0.61027
s__Lautropia_mirabilis	1035	26.2965	0.192052	0.530194	-0.0503428	-0.0503428	-0.207533	0.106848	0.498976	NA	0.37559665835787	0.382733088885226	NA	0.163241656469076	0.581031926184064	0.264489052600479	NA	0.711025
s__Ruminococcus_callidus	1262	43.5378	0.0630974	0.538629	-0.0514338	-0.0514338	-0.215379	0.112512	0.396452	0.945131690020921	0.1875272261266	0.702482670920476	0.535690169641512	0.889975246270984	0.232592081202028	0.0250591325357696	0.544026705656552	0.713353
s__Clostridiales_bacterium_CHKCI006	1156	0	0.626785	0.367314	-0.0534357	-0.0534357	-0.169609	0.0627375	0.132307	0.6415190867392	0.804359367159738	NA	0.517425235634523	0.168600752556011	0.548584482370344	0.114846694100072	NA	0.57749
s__Phascolarctobacterium_sp_CAG_266	1262	0	0.595886	0.325874	-0.0557325	-0.0557325	-0.166917	0.0554516	0.146305	0.42363381680332	0.235142467498733	0.806567483264269	0.340366708979535	0.714405206195664	0.622799794200512	0.539677468355628	0.333710695743566	0.534108
s__Dialister_succinatiphilus	1262	0.000311829	0.386022	0.314285	-0.05711	-0.05711	-0.168346	0.0541259	0.911699	0.131733208258922	0.335668610457403	0.20080235530146	0.769023572053263	0.326706554868585	0.288423451137693	0.602971516862593	0.365612743196242	0.526541
s__Weissella_confusa	1109	6.11648	0.394057	0.363182	-0.0586232	-0.0586232	-0.184981	0.0677344	0.652181	NA	0.187850865171327	NA	0.190122358664165	0.552394771173143	0.35981396064216	0.263191118802859	1	0.575499
s__Prevotella_sp_CAG_1124	967	0.0113363	0.438196	0.363421	-0.0588352	-0.0588352	-0.185713	0.0680424	0.291319	NA	NA	0.294893983818087	0.961999755373719	0.159309393367584	0.610450313147488	0.471728769529743	NA	0.575499
s__Butyrivibrio_crossotus	1262	0	0.601095	0.282767	-0.0609345	-0.0609345	-0.172122	0.0502533	0.579829	0.0562331521203162	0.767729394591155	0.900676560163781	0.651872780912102	0.0898832991226748	0.0613768523350844	0.712041001767176	0.712138813627184	0.495271
s__Turicibacter_sanguinis	1262	35.6534	0.11882	0.432801	-0.0612008	-0.0612008	-0.214121	0.0917189	0.919781	0.447055897091133	0.572014396341269	0.382733088885226	0.24479095547472	0.8966398595001	0.0738987678242803	0.0218771537070817	0.0419261675968508	0.641433
s__Streptococcus_australis	1262	0.015816	0.263444	0.276543	-0.0617852	-0.0617852	-0.173075	0.049505	0.00358705	0.131854489046213	0.0292976522243803	0.744064669229653	0.637281339959384	0.687992096602142	0.300445798891694	0.765255908732694	0.333710695743566	0.490313
s__Lactococcus_raffinolactis	1052	21.0627	0.240824	0.408788	-0.0624795	-0.0624795	-0.210728	0.0857692	0.130482	0.766640182603409	0.240508660367924	NA	0.904539627007347	NA	0.30544804067441	0.212211236023348	NA	0.615312
s__Veillonella_rogosae	1262	57.4395	0.0235308	0.493679	-0.0662394	-0.0662394	-0.255914	0.123436	0.562298	0.00581851697270319	0.0274051115682455	0.595749652233274	0.176901832792849	0.0656233607385961	0.58111338481249	0.652510395462182	0.637622573106454	0.687581
s__Actinomyces_naeslundii	1202	57.1653	0.0353223	0.499789	-0.0668695	-0.0668695	-0.261086	0.127347	0.0304831	0.0422047859750424	0.880184142235055	0.294893983818087	0.32701258443622	0.730003265033528	0.397783968872849	0.91878920124719	NA	0.691096
s__Rothia_mucilaginosa	1262	0	0.575369	0.233383	-0.0676101	-0.0676101	-0.178808	0.0435879	0.55793	0.285942911749582	0.0115716579815181	1	0.429863672022114	0.476775138650052	0.670957478737841	0.265317578464191	0.681039333452159	0.430976
s__Bacteroides_pectinophilus	1262	19.1913	0.229234	0.311179	-0.0687991	-0.0687991	-0.201945	0.064347	0.523144	0.0401349676213698	0.632510504196203	0.126293592932509	0.699211805152071	0.0800337088716664	0.540848233561143	0.467162558617873	0.677141411588199	0.522854
s__Intestinibacter_bartlettii	1262	0	0.487236	0.218922	-0.0697642	-0.0697642	-0.180985	0.041457	0.0101184	0.459454201583927	0.700848250184837	0.950241615743525	0.120576593789767	0.614717484437078	0.216395407140212	0.740769279954121	0.0815229720841182	0.412785
s__Carnobacterium_divergens	1049	0.00059793	0.229145	0.250945	-0.0714735	-0.0714735	-0.193493	0.0505461	0.105545	NA	0.240508660367924	NA	0.133408778285585	0.326706554868585	0.30544804067441	0.379225528623955	NA	0.453269
s__Mitsuokella_jalaludinii	1262	0.0170828	0.296947	0.206713	-0.0716999	-0.0716999	-0.182997	0.0395967	0.242803	0.781299539836952	0.772889289168513	0.874527969784602	0.206084264627419	0.310274946557178	0.677806116005389	0.0782814981498412	0.00188165728588024	0.396944
s__Enterococcus_casseliflavus	1098	0.00290731	0.290759	0.226623	-0.0736366	-0.0736366	-0.193002	0.0457288	0.921916	0.421881661901137	0.240508660367924	0.718372718858133	NA	NA	0.176109350604431	0.376856091720398	0.021577191872833	0.421184
s__Blautia_producta	1262	0.00298016	0.463652	0.19313	-0.0738572	-0.0738572	-0.185091	0.0373769	0.012003	0.574329567583382	0.898242070647162	0.470744064989991	0.188842275711265	0.3844772081352	0.972793417410595	0.287022466907266	0.160802121440221	0.383605
s__Bacteroides_sp_CAG_598	1156	31.2701	0.249216	0.326183	-0.0765264	-0.0765264	-0.229291	0.0762381	0.975364	0.222292708513491	0.365731464245163	NA	0.118525155026048	0.994386743636765	0.832740141015188	0.798268507420226	NA	0.534108
s__Pseudoflavonifractor_capillosus	1202	0	0.938691	0.186396	-0.0767754	-0.0767754	-0.19066	0.0371088	0.79557	0.363908727393317	0.506137811047749	0.652722262391188	0.807302951781314	0.44439862001338	0.263109710251614	0.876164680372286	NA	0.37539
s__Bifidobacterium_breve	1262	0	0.853596	0.17533	-0.0768562	-0.0768562	-0.188004	0.0342912	0.85539	0.410199794641031	0.965514109005429	0.336668678261625	0.517158486573182	0.713829314171304	0.111068564936523	0.609061481346389	0.85834087682442	0.358208
s__Actinomyces_sp_oral_taxon_170	1202	3.56627	0.358245	0.195815	-0.0780956	-0.0780956	-0.196423	0.0402319	0.201785	0.722514471806104	0.409500109565937	0.294893983818087	0.120612110330704	0.326706554868585	0.972793417410595	0.185932224712939	NA	0.387606
s__Pediococcus_acidilactici	1077	0	0.46254	0.200075	-0.0787761	-0.0787761	-0.199274	0.0417217	0.122826	0.438755353705591	0.409500109565937	0.294893983818087	0.300371377863526	1	NA	0.212211236023348	NA	0.388094
s__Streptococcus_sp_A12	1202	0.000649101	0.378541	0.173736	-0.0791337	-0.0791337	-0.193152	0.0348849	0.00213449	0.425704020540908	0.435557663324905	0.20080235530146	0.96209995565141	0.687955827394209	0.591158246335476	0.597227744648666	NA	0.358208
s__Actinomyces_sp_oral_taxon_448	1202	50.6459	0.0455279	0.370543	-0.0825151	-0.0825151	-0.263123	0.098093	0.0198821	0.229877209326453	0.980410480065281	0.126293592932509	0.475472863506695	0.329252580561404	0.411533208205032	0.294733884642563	NA	0.58008
s__Haemophilus_parainfluenzae	1262	42.8647	0.091937	0.320311	-0.0827423	-0.0827423	-0.245923	0.0804382	0.62984	0.0601222642209249	0.00800740420330099	1	0.48108790797983	0.505858448855102	0.823492714521743	0.0745886367804903	0.0153217635783195	0.532011
s__Gemmiger_sp_An87	1049	0	0.688617	0.161379	-0.0871159	-0.0871159	-0.209037	0.0348049	0.907778	NA	0.09341207495122	NA	0.300371377863526	0.326706554868585	0.95467131576096	0.5354538450634	NA	0.3427
s__Citrobacter_koseri	970	0.0846833	0.434017	0.17242	-0.08846	-0.08846	-0.215527	0.0386066	0.667016	NA	0.237107019143383	0.900676560163781	0.300371377863526	0.0822667000855503	NA	0.394583509110472	NA	0.358208
s__Methanosphaera_stadtmanae	1156	49.4361	0.0594366	0.329391	-0.0899418	-0.0899418	-0.270681	0.0907978	0.00830757	0.663004540404067	0.240508660367924	NA	0.024199629770246	0.0881287890019973	0.804107275062302	0.662067726804667	NA	0.536305
s__Prevotella_sp_CAG_485	1202	0	0.626223	0.12115	-0.0901303	-0.0901303	-0.204102	0.0238415	0.291319	0.395597366997888	0.365731464245163	0.900676560163781	0.769023572053263	0.326706554868585	0.37175491739669	0.599497227368526	NA	0.275688
s__Anaerotruncus_sp_CAG_528	1134	48.5121	0.0429799	0.333761	-0.0911106	-0.0911106	-0.275861	0.0936398	0.105545	0.131733208258922	NA	0.950241615743525	0.23041635728146	0.163241656469076	0.564219034495364	0.0232634225122306	0.544026705656552	0.540375
s__Gordonibacter_pamelaeae	1262	49.1795	0.0345347	0.293383	-0.092953	-0.092953	-0.266342	0.0804358	0.240455	0.0611964058572654	0.499674978279302	0.0602474953831067	0.292776941101846	0.380121802132964	0.471472990689886	0.0353320395595557	1	0.504689
s__Clostridium_sp_CAG_299	1202	0	0.720349	0.107508	-0.0935829	-0.0935829	-0.207544	0.0203778	1	0.286675730491258	0.377933543068946	0.439647769624178	0.850516547043638	0.926318290113795	0.817080386548193	0.0694621462216975	NA	0.255784
s__Ruminococcus_lactaris	1262	0.00239075	0.672576	0.0972554	-0.0940972	-0.0940972	-0.205311	0.0171169	0.519847	0.915690959715715	0.515301829421912	0.296344815647465	0.643729143678625	0.0959576841950177	0.171440891894744	0.0859163414763389	0.321449156766352	0.238193
s__Eubacterium_sp_CAG_786	1216	0.00217019	0.501401	0.103111	-0.0942429	-0.0942429	-0.207566	0.0190808	0.034558	0.257348456908861	0.240508660367924	NA	0.367053313162153	0.617197582622437	0.972793417410595	0.379225528623955	0.333710695743566	0.249364
s__Haemophilus_pittmaniae	1262	0	0.601069	0.0901222	-0.0961787	-0.0961787	-0.207408	0.0150509	0.382515	0.252535730930715	0.240508660367924	0.126293592932509	0.775943535654915	1	0.615476898564737	0.212211236023348	0.160802121440221	0.226481
s__Haemophilus_sputorum	1262	51.3559	0.0269024	0.285026	-0.0967087	-0.0967087	-0.274004	0.0805863	0.229808	0.861589925299449	0.000495689173267526	0.382733088885226	0.961999755373719	0.301062450182929	0.520187451723909	0.0644936536745891	0.333710695743566	0.497719
s__Eubacterium_sp_CAG_274	1202	0.000247809	0.539422	0.0919159	-0.0980338	-0.0980338	-0.21204	0.015972	0.0563483	0.54463260778193	0.269246825463355	0.110244420486825	0.898933954915337	0.520950171932488	0.25574465496999	0.838153324814458	NA	0.228997
s__Bacteroides_sp_CAG_633	1202	28.3102	0.190967	0.191951	-0.098046	-0.098046	-0.24532	0.0492275	0.782684	0.222292708513491	0.0386942470667822	0.382733088885226	0.0623926133465509	0.326706554868585	0.320985664171367	0.465298687611205	NA	0.382579
s__Roseburia_hominis	1262	0	0.871551	0.0809897	-0.0989766	-0.0989766	-0.210148	0.0121945	0.30301	0.34616859178303	0.651573924169834	0.483384807156639	0.958428990726331	0.0404535294457551	0.0981483337533247	0.874361002427131	0.39427881964247	0.209919
s__Ruminococcus_bicirculans	1262	54.3296	0.0406305	0.26968	-0.103155	-0.103155	-0.286323	0.0800123	0.000623882	0.737723087240296	0.00279299083716634	0.232639531149785	0.526767610147532	0.156158384144547	0.929047646757824	0.109543484356783	0.828230843772056	0.479615
s__Coprococcus_eutactus	1262	32.906	0.14388	0.170775	-0.104423	-0.104423	-0.253845	0.0449987	0.0935045	0.711498842322238	0.0782285348290929	0.284225893633432	0.594868125388148	0.372540093017243	0.374422166335673	0.827834012055787	0.0194615233865016	0.357638
s__Roseburia_sp_CAG_471	1262	41.8389	0.0899959	0.198578	-0.105907	-0.105907	-0.267366	0.0555519	0.0517964	0.951036559880081	0.00339321228473339	0.310220140069205	0.915825903593718	0.1597080804576	0.996037141632278	0.069720837274276	0.333710695743566	0.388094
s__Gemmiger_formicilis	1262	0	0.66788	0.0528163	-0.109897	-0.109897	-0.221131	0.0013362	0.124701	0.547789991228333	0.0763418939037776	0.176945098968044	0.750036237847896	0.423288078236875	0.0723512540478822	0.511371700489532	0.0687451379163854	0.154964
s__Propionibacterium_freudenreichii	556	0	0.580387	0.183891	-0.113362	-0.113362	-0.28056	0.0538366	0.0921596	0.910385314822589	NA	0.900676560163781	0.961999755373719	0.310274946557178	0.501472658326967	NA	NA	0.371639
s__Lactobacillus_delbrueckii	1262	20.3435	0.232803	0.096446	-0.114098	-0.114098	-0.248624	0.0204285	0.525363	0.530897867361198	0.796076638504789	0.900676560163781	0.834767092133472	0.0969620039922626	0.519757668672644	0.359291634195715	0.00558431205717215	0.237216
s__Saccharomyces_cerevisiae	1156	0	0.988496	0.0532595	-0.114549	-0.114549	-0.230708	0.00160927	0.903297	0.64024065115143	0.992367248622837	NA	0.300371377863526	0.567488824907502	0.632239185783908	0.0476095859279148	NA	0.155475
s__Blautia_wexlerae	1262	54.5809	0.0426616	0.218507	-0.11532	-0.11532	-0.299002	0.0683624	0.0003964	0.0694570701656616	0.805127995692384	0.275607182295104	0.122105079749527	0.0470149530347814	0.252618514452094	0.838941511409505	0.258144899790217	0.412785
s__Bifidobacterium_pseudocatenulatum	1262	39.8066	0.0956482	0.153713	-0.115624	-0.115624	-0.274482	0.0432351	0.0200159	0.71377067244504	0.781505910456524	0.0580788809835127	0.0649953925243742	0.116650294746622	0.342634942347628	0.0668301183012326	0.311548274142447	0.332757
s__Bacteroides_sp_CAG_661	1156	12.7981	0.61283	0.0828	-0.115822	-0.115822	-0.246686	0.0150429	0.42771	0.222292708513491	0.167514817746211	NA	0.244010215427624	0.326706554868585	0.475384989534474	0.42821507741522	NA	0.213654
s__Terrisporobacter_othiniensis	1031	0	0.650474	0.0641719	-0.116315	-0.116315	-0.239479	0.00684828	0.189672	0.741349956934042	0.409500109565937	NA	0.924085656273987	0.159309393367584	NA	0.111481536617396	NA	0.180055
s__Aeriscardovia_aeriphila	1262	71.6953	0.00126925	0.321412	-0.117267	-0.117267	-0.349063	0.114529	0.00134137	0.0055428474115292	0.247656893990002	0.251802733093725	0.75002399664754	0.769518990220251	0.0012235141778058	0.843194645591205	0.333710695743566	0.532311
s__Roseburia_sp_CAG_309	1262	0.00589612	0.200302	0.0353536	-0.11958	-0.11958	-0.230958	-0.0082013	0.584121	0.735240507899706	0.941278645356471	0.51665205017498	0.51942254514192	0.00518312165608314	0.345192215279798	0.595066698459517	0.0419261675968508	0.117258
s__Parasutterella_excrementihominis	1262	0.00187468	0.397032	0.0344679	-0.12009	-0.12009	-0.231401	-0.00877958	0.273125	0.0451087694649665	0.00870266943017631	0.274986550725824	0.72797156231001	0.542714851142204	0.344847365053744	0.233948291664313	0.387170292977851	0.115893
s__Coprococcus_comes	1262	34.1231	0.12183	0.107535	-0.124052	-0.124052	-0.275128	0.0270241	0.0724476	0.0316298728490045	0.059445939019168	0.348867444540032	0.138354967528036	0.950663494690335	0.683477638178092	0.363305886716267	0.874309560864708	0.255784
s__Enterorhabdus_caecimuris	1262	39.2979	0.126056	0.113211	-0.12775	-0.12775	-0.285829	0.0303291	0.464127	0.0561430794386647	0.590466438886044	0.100116528603534	0.122876878253677	0.0970992815826962	0.0182539273485236	0.769205759500559	0.333710695743566	0.26349
s__Dialister_sp_CAG_357	1262	25.4401	0.174194	0.0694654	-0.130102	-0.130102	-0.270565	0.0103617	0.300644	0.103906750667316	0.160896126232283	0.0101552306217804	0.272863961032333	0.326706554868585	0.604981308056648	0.778646171899514	0.883994051643058	0.188054
s__Ruminococcus_champanellensis	1262	0.00671648	0.28394	0.0210508	-0.131093	-0.131093	-0.242463	-0.0197235	0.100484	0.724785322342108	0.409500109565937	0.900676560163781	0.680390335586726	0.0842717273027923	0.351374217633546	0.0767921734569508	0.0762342619754617	0.0795558
s__Clostridium_sp_CAG_167	1134	41.2539	0.117342	0.11351	-0.139053	-0.139053	-0.311261	0.0331555	0.334791	0.550067748974261	NA	0.596650967890699	1	0.0343863573977605	0.0545257087057759	0.102788483696839	1	0.26349
s__Romboutsia_ilealis	1156	0.0035312	0.190804	0.01862	-0.139762	-0.139762	-0.256176	-0.0233479	0.0141163	0.0795629573537852	0.00141842683450734	NA	0.266471691574537	0.0832864350431982	0.488520535809104	0.0511086976674239	NA	0.0731576
s__Proteobacteria_bacterium_CAG_139	1262	49.022	0.0603549	0.104394	-0.143646	-0.143646	-0.317018	0.0297256	0.110912	0.257169617800132	0.0426942134453195	0.294976365820822	0.568023971216494	0.779508087714835	0.340532682526066	0.028024778782833	0.227579758627376	0.251052
s__Streptococcus_salivarius	1262	0.00237106	0.397129	0.00885596	-0.148733	-0.148733	-0.260101	-0.0373657	0.00154641	0.0985667875858399	0.133705998485741	0.0233566104936113	0.217733778463792	0.607502525083646	0.126696413095773	0.0522125508736673	0.181978245768507	0.0412802
s__Bifidobacterium_catenulatum	1262	48.966	0.0336834	0.0909712	-0.149372	-0.149372	-0.322574	0.0238306	0.000341536	0.297303069091073	0.365003624688029	0.206489489251857	0.807558304308647	0.199785619219678	0.889612390753951	0.92891174096405	0.491776553828012	0.227625
s__Bifidobacterium_bifidum	1262	0	0.83226	0.00692373	-0.153324	-0.153324	-0.264603	-0.0420443	0.590996	0.633390039794965	0.581513522025277	0.261214675451355	0.299455733784778	0.705626758380551	0.726371742596569	0.226327757030739	0.730812840818108	0.0342044
s__Turicimonas_muris	1262	27.8246	0.179501	0.0322361	-0.156567	-0.156567	-0.299863	-0.0132703	0.0470381	0.52266697294417	0.060743458808189	0.205523861166559	0.621563824952096	0.444793506961349	0.171528170347215	0.0832475973475368	0.311813620962406	0.110251
s__Lactobacillus_rogosae	1262	69.118	0.0038693	0.165098	-0.157467	-0.157467	-0.379802	0.0648682	0.0462958	0.000204879258281779	0.00567062699762697	0.69774592461943	0.872762108336352	0.551654232844325	0.997974002024298	0.00150707607291531	0.0815229720841182	0.348273
s__Clostridium_sp_CAG_253	1262	0	0.833624	0.00545614	-0.157777	-0.157777	-0.269062	-0.0464924	0.24021	0.0799567590770582	0.921759858525397	0.382733088885226	0.420269879945252	0.910917258513141	0.957689070903513	0.0119468700407573	0.333710695743566	0.0281576
s__Eubacterium_sp_CAG_38	1262	0.0192554	0.437131	0.00543132	-0.158024	-0.158024	-0.269424	-0.0466244	0.125437	0.961682292082342	0.0660254406475428	0.174465330160291	0.739754762711164	0.329755428128672	0.0656617489563717	0.360635708989278	0.381330339157245	0.0281576
s__Prevotella_copri	1262	89.5988	2.45154e-07	0.408435	-0.15974	-0.15974	-0.538478	0.218998	0.568302	2.29618293512397e-10	0.727183583133475	0.559126268613455	0.51683598376437	0.174087427482262	0.000108170627443013	0.00755881581517768	1.39719462061109e-05	0.615312
s__Bifidobacterium_longum	1262	14.2504	0.123855	0.00812807	-0.172837	-0.172837	-0.300828	-0.044846	0.0177463	0.288989604966639	0.373022141397125	0.0282057947166093	0.256760202353572	0.770161027719087	0.346236958156222	0.79502425979251	0.508445978863182	0.0381953
s__Lachnospira_pectinoschiza	1262	72.8351	0.000941867	0.141827	-0.177509	-0.177509	-0.414342	0.0593231	0.209238	0.000144319886007129	0.00463176372197768	0.943066067872053	0.500837640206352	0.631738939841551	0.498447966331879	0.00549354717311326	0.000313487040949502	0.315292
s__Adlercreutzia_equolifaciens	1262	0	0.788544	0.000719307	-0.192211	-0.192211	-0.303599	-0.0808231	0.769035	0.186337059091028	0.889981970247012	0.137919954221922	0.423088556955696	0.0672213206192029	0.251793028748035	0.183743921894934	0.0815229720841182	0.00515667
s__Eubacterium_hallii	1262	60.2474	0.00382065	0.0517209	-0.195136	-0.195136	-0.391728	0.00145588	0.000383783	0.106512311540031	0.101753819860223	0.0523608039852163	0.22153688610066	0.99740325307463	0.137549496045241	0.237983666957178	0.356047744400602	0.154964
s__Bifidobacterium_angulatum	556	50.2556	0.0766197	0.109444	-0.198408	-0.198408	-0.441346	0.0445311	0.034558	0.0200018235014676	NA	0.294893983818087	NA	1	0.343060989065977	NA	0.0164424522828485	0.258198
s__Lactobacillus_ruminis	1216	57.8718	0.0216165	0.0450622	-0.198455	-0.198455	-0.392543	-0.004368	0.00666118	0.861589925299449	0.365731464245163	NA	0.367053313162153	0.582777617292422	0.0527713172627764	0.178969889265084	6.06236346555977e-05	0.141554
s__Streptococcus_thermophilus	1262	0	0.598732	0.000430297	-0.20019	-0.20019	-0.311633	-0.0887471	0.0360769	0.00643194925180233	0.519234771633945	0.287551851623679	0.614403160221454	0.387738306250038	0.716212734060613	0.640030656787515	0.333710695743566	0.00331616
s__Eubacterium_sp_CAG_251	1262	46.6736	0.0460192	0.0197264	-0.2017	-0.2017	-0.371258	-0.0321428	0.530479	0.2906025890458	0.0914621917019784	0.887770360976402	0.862044897268961	0.354170350367726	0.00265667742057828	0.702186467558261	0.119774436539999	0.075509
s__Eubacterium_ventriosum	1262	67.7559	0.00465247	0.0506661	-0.217478	-0.217478	-0.435586	0.000630597	0.00317707	0.432631948140112	0.000585146737344384	0.537117574018561	0.0235636058967384	0.680689602157297	0.0952372181316729	0.645689264337174	0.021577191872833	0.153325
s__Asaccharobacter_celatus	1262	0	0.920496	0.000109815	-0.219901	-0.219901	-0.331333	-0.108469	0.884504	0.198141873490658	0.887711272014225	0.318870635107707	0.268838864215441	0.0554647518808393	0.206343427007994	0.168278791475852	0.0815229720841182	0.00105789
s__Bifidobacterium_adolescentis	1262	45.3558	0.0509008	0.00772261	-0.227938	-0.227938	-0.395639	-0.0602366	0.178364	0.798809551699852	0.124497205708786	0.0941935511256915	0.299993269859185	0.25196430342317	0.193470765792666	0.728341987383677	0.0001534792160767	0.0371972
s__Agathobaculum_butyriciproducens	1262	32.9707	0.233084	0.00235533	-0.232466	-0.232466	-0.382277	-0.082655	0.333787	0.0510417100264816	0.0922786860019477	0.748884933538806	0.413648581075783	0.446770975205845	0.0126638934937674	0.74410309486883	0.274421499375916	0.0136138
s__Anaerostipes_hadrus	1262	52.4341	0.032346	0.00933136	-0.23883	-0.23883	-0.41889	-0.0587693	0.000802201	0.000570560019351321	0.233991722307399	0.193007611219375	0.819683035969401	0.142583842541564	0.0430089496298888	0.251562625799979	0.144936222234075	0.0425141
s__Fusicatenibacter_saccharivorans	1262	56.8306	0.0158143	0.0102307	-0.247593	-0.247593	-0.436568	-0.0586187	0.0137698	0.0192354609242859	2.40757994395471e-05	0.782259503722991	0.622076587116381	0.168994682861975	0.209405636588406	0.464325481287738	0.446418421873151	0.0451025
s__Eubacterium_eligens	1262	65.5526	0.00831345	0.0168455	-0.257869	-0.257869	-0.469335	-0.0464043	0.00141897	0.11148545207349	0.00169043568448999	0.00373659454713432	0.704117050495786	0.185739627126107	0.338802047700216	0.0332773506365158	0.738979142120754	0.0685684
s__Roseburia_sp_CAG_303	1156	0	0.724522	9.89138e-06	-0.263006	-0.263006	-0.379643	-0.146369	0.0470763	0.114943677692584	0.0128968277582646	NA	0.924085656273987	0.459553528449605	0.706656440191467	0.066345207763893	NA	0.000154519
s__Eubacterium_rectale	1262	71.5167	0.000592612	0.0103002	-0.304119	-0.304119	-0.536449	-0.0717889	0.00152373	0.997489592283322	0.0085120048842806	0.116169341538727	0.394082712058366	0.425802276980644	0.41060411611365	0.358453482537555	3.57704658464152e-06	0.0451025
s__Roseburia_intestinalis	1262	32.8831	0.158215	5.79927e-05	-0.308282	-0.308282	-0.458554	-0.158009	0.00289076	0.425092036273243	0.00398821082204926	0.255481265078627	1	0.605210924536239	0.000902355758855999	0.00755999572244108	0.000328131438099573	0.00065725
s__Roseburia_faecis	1262	57.7747	0.0240625	0.00020411	-0.364398	-0.364398	-0.556705	-0.17209	0.255698	0.564711011121417	0.0152228190113887	0.09786565503139	0.401704080427309	0.784782989616624	0.0121426779258918	0.000148974715649595	6.56237762040489e-07	0.00176823
s__Faecalibacterium_prausnitzii	1262	51.7373	0.03711	5.6079e-05	-0.36936	-0.36936	-0.549053	-0.189668	0.147421	0.774635755994832	0.00100348746461939	0.0639316101668575	0.729594840993763	0.582765098039187	7.31858171824646e-05	0.0154009356602663	0.000336533043260967	0.00065725

## Sheet: meta_analysis_humann3_pathways
Pathway	Description	Number_Samples	I^2	P-value Fit	Pvalue	PvalueAdjusted	Standard Error	Coefficient	Confidence Interval Lower Limit	Confidence Interval Upper Limit	ZellerG_2014	FengQ_2015	YuJ_2015	ThomasAM_2019_a	ThomasAM_2019_b	VogtmannE_2016	WirbelJ_2019	YachidaS_2019	GuptaA_2019
P163-PWY	L-lysine fermentation to acetate and butanoate	1262	46.0006	0.0486457	1.03822e-11	4.77582e-09	0.580083	0.580083	0.412913	0.747253	1.74017e-06	0.00394368	1.01607e-05	0.0442651	0.0881869	0.0406824	1.89486e-05	0.00103788	0.333711
PWY-6588	pyruvate fermentation to acetone	1262	57.7486	0.00384901	3.17152e-09	7.2945e-07	0.571908	0.571908	0.382643	0.761174	4.3932e-05	0.0292192	0.00144482	0.0516744	0.145329	0.0149033	0.00982243	0.0106653	1.16527e-06
PWY-6151	S-adenosyl-L-methionine cycle I	1262	69.45	0.000654369	3.59039e-06	0.000102402	-0.522936	-0.522936	-0.744124	-0.301749	1.67416e-06	0.000178759	0.0841655	0.039437	0.422141	0.194636	0.016432	0.0443405	2.06897e-05
PWY-7357	thiamin formation from pyrithiamine and oxythiamine (yeast)	1262	77.7626	5.99159e-05	8.02475e-05	0.000922846	-0.519387	-0.519387	-0.777518	-0.261256	0.00650283	0.000212867	0.0990225	0.0333265	0.145329	0.281951	0.000324318	0.16463	1.07742e-08
PWY-5088	L-glutamate degradation VIII (to propanoate)	1262	52.6722	0.0192421	1.22744e-07	1.12924e-05	0.47975	0.47975	0.30198	0.657521	0.00076985	0.000210785	0.00499041	0.00428759	0.00211466	0.123753	0.0605558	0.0956121	0.00120454
ILEUSYN-PWY	L-isoleucine biosynthesis I (from threonine)	1262	55.0257	0.0167213	5.27559e-07	2.42677e-05	-0.466608	-0.466608	-0.648931	-0.284285	0.0165092	7.07288e-05	0.232134	0.00436013	0.675019	0.155459	0.00767536	0.0103435	1.77328e-05
VALSYN-PWY	L-valine biosynthesis	1262	55.0257	0.0167213	5.27559e-07	2.42677e-05	-0.466608	-0.466608	-0.648931	-0.284285	0.0165092	7.07288e-05	0.232134	0.00436013	0.675019	0.155459	0.00767536	0.0103435	1.77328e-05
PWY-7237	myo-, chiro- and scillo-inositol degradation	1262	80.219	8.26026e-05	0.00112765	0.00492621	-0.452349	-0.452349	-0.724595	-0.180104	0.174526	9.68669e-05	0.117028	0.526088	0.212231	0.737768	0.0276999	0.0718239	7.50073e-09
TRPSYN-PWY	L-tryptophan biosynthesis	1262	76.8535	3.5168e-05	0.000505055	0.00296113	-0.447248	-0.447248	-0.699282	-0.195214	1.91318e-09	4.48817e-05	0.113676	0.844204	0.888896	0.410849	0.609028	0.013617	0.000292938
PWY-7111	pyruvate fermentation to isobutanol (engineered)	1262	41.555	0.0699867	7.74934e-08	8.91174e-06	-0.436386	-0.436386	-0.595575	-0.277197	0.0267147	7.85932e-05	0.267947	0.0234608	0.664292	0.179436	0.0102525	0.00635332	0.000102109
HISDEG-PWY	L-histidine degradation I	1262	79.2359	1.36706e-05	0.00146345	0.00575995	0.43132	0.43132	0.165633	0.697006	2.03951e-06	0.00909901	0.0328945	0.443899	0.422141	0.290766	0.000718116	0.437235	5.63282e-07
P162-PWY	L-glutamate degradation V (via hydroxyglutarate)	1262	70.2397	2.48344e-05	0.000171936	0.00149227	0.426825	0.426825	0.20416	0.649491	4.35374e-05	0.000428744	0.000141407	0.964316	0.0482459	0.0413486	0.000951039	0.976535	0.000661674
PWY-1042	glycolysis IV (plant cytosol)	1262	51.2627	0.0263759	1.80357e-06	6.91367e-05	-0.425615	-0.425615	-0.600342	-0.250889	0.00260365	0.000420231	0.137508	0.0314747	0.0987434	0.192408	0.100362	0.0511991	4.86725e-06
HISTSYN-PWY	L-histidine biosynthesis	1262	41.5214	0.0491383	2.80131e-07	1.61075e-05	-0.416838	-0.416838	-0.575898	-0.257778	0.00672985	0.00625387	0.0639126	0.0161942	0.349367	0.173198	0.0325761	0.00899598	4.47313e-06
PWY-6386	UDP-N-acetylmuramoyl-pentapeptide biosynthesis II (lysine-containing)	1262	75.3966	0.000149169	0.00107563	0.00480378	-0.407493	-0.407493	-0.651738	-0.163248	0.0126298	4.61126e-05	0.424755	0.0604034	0.785555	0.0296566	0.391236	0.356599	2.23947e-06
GLUTORN-PWY	L-ornithine biosynthesis	1262	59.9289	0.00546668	4.88169e-05	0.000641593	-0.398045	-0.398045	-0.590144	-0.205947	2.55645e-05	2.59185e-05	0.0560252	0.107924	0.93554	0.132318	0.000799645	0.124867	0.381736
PWY-5918	superpathay of heme biosynthesis from glutamate	1262	62.3233	0.00493354	9.08251e-05	0.000994751	0.395989	0.395989	0.197689	0.59429	0.00870928	0.0246348	0.74035	0.000238435	0.0309304	0.00135784	0.0434635	0.154559	0.00337743
PWY-5677	succinate fermentation to butanoate	1262	47.5722	0.0291735	5.48705e-06	0.000132844	0.389241	0.389241	0.221396	0.557087	0.00375973	0.00891068	0.247147	0.785965	0.50301	0.0489127	0.000178836	0.585755	0.000661674
COMPLETE-ARO-PWY	superpathway of aromatic amino acid biosynthesis	1262	53.6975	0.0209386	2.18687e-05	0.000402384	-0.387024	-0.387024	-0.565721	-0.208327	2.08856e-05	3.70985e-05	0.298304	0.457076	0.831138	0.0855118	0.039099	0.128662	0.0049944
P108-PWY	pyruvate fermentation to propanoate I	1262	31.8886	0.169264	2.56389e-07	1.61075e-05	0.383886	0.383886	0.237873	0.5299	0.00171258	0.000461855	0.0267184	0.195205	0.632523	0.0915922	0.138865	0.0580094	0.00262021
PWY-6387	UDP-N-acetylmuramoyl-pentapeptide biosynthesis I (meso-diaminopimelate containing)	1262	73.6627	0.000324722	0.0017096	0.00649929	-0.377565	-0.377565	-0.613499	-0.141631	0.0207644	7.2622e-05	0.621707	0.0604034	0.696667	0.0428551	0.519	0.355008	6.79309e-06
PWY-5189	tetrapyrrole biosynthesis II (from glycine)	1262	49.2312	0.0341887	1.68388e-05	0.000336776	0.374735	0.374735	0.204054	0.545416	0.00897742	0.122364	0.700509	0.000689064	0.12852	0.000982634	0.0168957	0.0711663	0.0306963
PWY-5845	superpathway of menaquinol-9 biosynthesis	1262	56.8792	0.0124796	0.000106727	0.00106718	0.366358	0.366358	0.181044	0.551671	0.0329017	0.0711054	0.360552	0.00143555	0.264154	0.0962044	0.0339313	0.209029	7.0974e-05
PWY-5862	superpathway of demethylmenaquinol-9 biosynthesis	1262	57.9002	0.0109589	0.000161381	0.0014847	0.360885	0.360885	0.173409	0.548361	0.0333734	0.0762147	0.397226	0.00132947	0.270619	0.0949093	0.0326953	0.219756	8.59568e-05
P42-PWY	incomplete reductive TCA cycle	1262	46.1807	0.044214	2.00201e-05	0.000383718	0.35982	0.35982	0.194453	0.525186	0.00337114	0.0119397	0.0224108	0.175009	0.0167093	0.945575	0.0489241	0.454529	0.00109304
PWY-5097	L-lysine biosynthesis VI	1262	66.97	0.00247837	0.000842983	0.00404832	-0.359466	-0.359466	-0.570514	-0.148417	0.00115552	0.000330719	0.749515	0.0516744	0.643043	0.155459	0.59526	0.170741	7.21502e-05
PWY-6163	chorismate biosynthesis from 3-dehydroquinate	1262	56.3473	0.0153166	0.000142215	0.00133508	-0.356889	-0.356889	-0.540758	-0.17302	0.000626044	5.71785e-05	0.278535	0.313604	0.685811	0.142643	0.0924456	0.231167	0.000542637
PWY-5920	superpathway of heme biosynthesis from glycine	1262	56.0197	0.0148303	0.000177746	0.00151414	0.350622	0.350622	0.167304	0.53394	0.0290008	0.0557161	0.963251	0.00141902	0.0305376	0.0202138	0.219738	0.371528	0.00267624
PWY4LZ-257	superpathway of fermentation (Chlamydomonas reinhardtii)	1262	49.2635	0.0279392	5.73144e-05	0.000676016	0.35017	0.35017	0.179597	0.520744	0.00733697	0.165279	0.163553	0.0182783	0.305507	0.0607113	0.00459606	0.250104	0.000201004
PWY-6969	TCA cycle V (2-oxoglutarate:ferredoxin oxidoreductase)	1262	57.3986	0.0147996	0.000232808	0.00180303	0.349563	0.349563	0.16341	0.535716	0.0210741	0.0130479	0.665042	0.210952	0.00244393	0.444921	0.810586	0.0694187	0.000793179
PWY-6385	peptidoglycan biosynthesis III (mycobacteria)	1262	70.428	0.0011201	0.0023162	0.00789222	-0.346103	-0.346103	-0.568777	-0.123429	0.0585131	0.00023501	0.601352	0.0775789	0.796889	0.0589462	0.911468	0.406375	7.37552e-06
PWY-6737	starch degradation V	1262	39.9361	0.0894402	1.44698e-05	0.000329509	-0.345219	-0.345219	-0.501243	-0.189194	0.000666432	0.000347052	0.013436	0.0939523	0.108285	0.100683	0.0506507	0.179235	0.675688
BIOTIN-BIOSYNTHESIS-PWY	biotin biosynthesis I	1262	58.4534	0.0144903	0.000366615	0.00234226	0.342788	0.342788	0.154225	0.53135	0.0255684	0.0137548	0.753185	0.00725254	0.632523	0.139131	0.380408	0.0422081	3.11274e-05
ARO-PWY	chorismate biosynthesis I	1262	54.8003	0.0172688	0.000197747	0.00161185	-0.342737	-0.342737	-0.523225	-0.16225	0.000158101	2.38382e-05	0.326087	0.195205	0.653633	0.0903491	0.0420026	0.361798	0.0371251
PEPTIDOGLYCANSYN-PWY	peptidoglycan biosynthesis I (meso-diaminopimelate containing)	1262	73.9809	0.000314452	0.00459118	0.0134519	-0.342706	-0.342706	-0.579685	-0.105728	0.0317545	0.00011608	0.808874	0.0490054	0.396965	0.0360261	0.899722	0.47222	1.40285e-05
P161-PWY	acetylene degradation	1262	43.0762	0.0533223	3.43369e-05	0.000585	0.339559	0.339559	0.178906	0.500212	0.00853919	0.140043	0.145363	0.0172195	0.312556	0.0634409	0.00381143	0.203575	0.00086743
METHGLYUT-PWY	superpathway of methylglyoxal degradation	1262	68.478	0.00161631	0.00228797	0.00785423	0.335861	0.335861	0.120037	0.551686	0.0913044	0.198014	0.108256	0.0052622	0.578396	0.00252806	0.063422	0.680958	4.96984e-05
PWY-6285	superpathway of fatty acids biosynthesis (E. coli)	1262	64.906	0.00652759	0.0013253	0.00554218	0.335496	0.335496	0.130677	0.540315	0.179274	0.0192019	0.861025	0.000604667	0.0654834	0.0208462	0.54515	0.0541504	0.0017967
PWY-6519	8-amino-7-oxononanoate biosynthesis I	1262	56.4059	0.018222	0.000360164	0.00234226	0.335012	0.335012	0.150967	0.519056	0.0304236	0.0137548	0.854149	0.00778006	0.643043	0.149859	0.439303	0.044502	5.73833e-05
PWY-5136	fatty acid &beta;-oxidation II (peroxisome)	1262	58.0886	0.00822861	0.000502002	0.00296113	0.332898	0.332898	0.14539	0.520406	0.00781454	0.0684956	0.343046	0.00476011	0.0281008	0.0171869	0.232708	0.990867	0.00234017
PWY-5392	reductive TCA cycle II	1262	11.3773	0.310751	1.85137e-07	1.41938e-05	0.329031	0.329031	0.205339	0.452723	0.0302426	0.0607166	0.226393	0.0761432	0.0506361	0.0422617	0.160666	0.0296707	0.000430972
REDCITCYC	TCA cycle VIII (helicobacter)	1262	53.0917	0.0198968	0.000317168	0.00214555	0.325623	0.325623	0.148385	0.502861	0.00248235	0.176954	0.12034	0.00109864	0.0286816	0.133702	0.97798	0.55384	0.00557068
PWY66-391	fatty acid &beta;-oxidation VI (peroxisome)	1262	38.7343	0.0757642	4.18934e-05	0.000638707	0.322635	0.322635	0.168281	0.476988	0.00322353	0.048585	0.0874086	0.673118	0.489188	0.0611831	0.0667831	0.284558	0.000547116
PWY-7400	L-arginine biosynthesis IV (archaebacteria)	1262	62.3578	0.00573359	0.00137177	0.00560879	-0.32259	-0.32259	-0.52014	-0.12504	0.000165469	1.95845e-05	0.338144	0.0333265	0.448216	0.0967028	0.00569472	0.107518	0.900743
PWY-6700	queuosine biosynthesis	1262	66.0741	0.00386232	0.00255512	0.00857923	-0.320253	-0.320253	-0.528321	-0.112186	0.0120361	0.452067	0.265863	0.0117073	0.176462	0.000634611	0.375064	0.0719444	0.000376278
ARGSYN-PWY	L-arginine biosynthesis I (via L-ornithine)	1262	62.6818	0.00547021	0.00162182	0.00621697	-0.319006	-0.319006	-0.517372	-0.12064	0.000165469	1.90393e-05	0.338144	0.0314747	0.439426	0.0941197	0.00604937	0.111408	0.959043
PWY-5840	superpathway of menaquinol-7 biosynthesis	1262	46.4893	0.0379316	0.000167217	0.00149227	0.318543	0.318543	0.152673	0.484412	0.0514789	0.134507	0.827668	0.00230527	0.0658751	0.125596	0.0637532	0.162911	0.000301627
FAO-PWY	fatty acid &beta;-oxidation I	1262	57.6847	0.00974252	0.000852391	0.00404832	0.31734	0.31734	0.130852	0.503828	0.00986838	0.0829829	0.410857	0.0041446	0.0327723	0.0174928	0.324201	0.996956	0.00344673
ARGSYNBSUB-PWY	L-arginine biosynthesis II (acetyl cycle)	1262	67.6018	0.00189738	0.00347367	0.0107241	-0.317055	-0.317055	-0.529695	-0.104414	0.000158101	1.10554e-05	0.293832	0.0117073	0.570993	0.0463038	0.00888077	0.123002	0.602204
PWY-7316	dTDP-N-acetylviosamine biosynthesis	1262	38.2807	0.0857587	5.46546e-05	0.000676016	0.316348	0.316348	0.162676	0.47002	0.00336765	0.168551	0.000680316	0.245929	0.259392	0.306461	0.018003	0.155909	0.00644067
PWY-7204	pyridoxal 5'-phosphate salvage II (plants)	1262	51.1348	0.0282469	0.000362604	0.00234226	0.315881	0.315881	0.14226	0.489502	0.0817202	0.0179662	0.815981	0.00616252	0.00983335	0.0297814	0.0173563	0.458374	0.00126382
NAD-BIOSYNTHESIS-II	NAD salvage pathway II	1262	76.1228	0.000292683	0.0127664	0.0292167	0.313641	0.313641	0.0667852	0.560497	0.0753669	0.00776716	0.43039	0.0143681	0.324442	0.0576438	0.688825	0.581876	8.18266e-06
PWY-5971	palmitate biosynthesis II (bacteria and plants)	1262	41.0037	0.0663378	0.000106626	0.00106718	0.31141	0.31141	0.1539	0.46892	0.0958471	0.0252634	0.631723	0.00449955	0.402464	0.0456609	0.395246	0.00745869	0.000412101
PYRIDOXSYN-PWY	pyridoxal 5'-phosphate biosynthesis I	1262	54.0737	0.0229836	0.000681276	0.00368691	0.310242	0.310242	0.131242	0.489242	0.0126298	0.00131627	0.450453	0.0220858	0.531599	0.54328	0.0732367	0.174344	0.000355036
PWY-5138	unsaturated, even numbered fatty acid &beta;-oxidation	1262	0	0.558257	6.67522e-08	8.91174e-06	0.308382	0.308382	0.196447	0.420318	0.00273713	0.0834835	0.175558	0.117183	0.539655	0.0299016	0.349885	0.00575352	0.0301441
PWY-5850	superpathway of menaquinol-6 biosynthesis I	1262	45.6501	0.0503046	0.000237048	0.00180303	0.308273	0.308273	0.143902	0.472644	0.0140179	0.0859574	0.94971	0.0250704	0.0405781	0.247577	0.0199769	0.184207	0.00146328
PWY-7288	fatty acid &beta;-oxidation (peroxisome, yeast)	1262	16.7661	0.176372	2.87004e-06	9.43012e-05	0.308187	0.308187	0.179117	0.437257	0.00402754	0.057542	0.0865081	0.946982	0.460377	0.0926982	0.0660429	0.043257	0.000590269
PWY-5896	superpathway of menaquinol-10 biosynthesis	1262	45.9895	0.0489646	0.000254071	0.00188504	0.307773	0.307773	0.142873	0.472673	0.0140179	0.0859574	0.94971	0.0250704	0.0405781	0.247577	0.0199769	0.187644	0.00146328
PWY66-422	D-galactose degradation V (Leloir pathway)	1262	65.0533	0.00257097	0.00321364	0.0102226	-0.307753	-0.307753	-0.512464	-0.103043	2.89782e-05	2.97743e-05	0.0689227	0.123456	0.372702	0.403491	0.0132031	0.530965	0.633267
PWY-5723	Rubisco shunt	1262	54.8355	0.0191751	0.000852839	0.00404832	0.307283	0.307283	0.126697	0.487869	0.0454454	0.0469722	0.777168	0.001304	0.0370236	0.0151526	0.500593	0.421112	0.00369456
PWY-6122	5-aminoimidazole ribonucleotide biosynthesis II	1262	74.8927	0.000484778	0.0124773	0.0290291	-0.30699	-0.30699	-0.547825	-0.0661553	0.0821329	1.95845e-05	0.938304	0.0352686	0.153768	0.18801	0.647596	0.231167	0.000125239
PWY-6277	superpathway of 5-aminoimidazole ribonucleotide biosynthesis	1262	74.8927	0.000484778	0.0124773	0.0290291	-0.30699	-0.30699	-0.547825	-0.0661553	0.0821329	1.95845e-05	0.938304	0.0352686	0.153768	0.18801	0.647596	0.231167	0.000125239
PWY-7221	guanosine ribonucleotides de novo biosynthesis	1262	74.8601	0.000339204	0.0124951	0.0290291	-0.3067	-0.3067	-0.547356	-0.066044	0.0350553	0.00023501	0.842779	0.118099	0.396965	0.103409	0.927158	0.365829	9.41585e-06
PWY-5860	superpathway of demethylmenaquinol-6 biosynthesis I	1262	45.638	0.0502322	0.000289311	0.00205245	0.303895	0.303895	0.139571	0.468218	0.0144793	0.0920543	0.976777	0.0250704	0.0421351	0.244814	0.0196948	0.188978	0.0013864
PWY-6527	stachyose degradation	1262	50.1217	0.0376961	0.000727816	0.00389297	-0.295476	-0.295476	-0.466871	-0.124081	1.57664e-05	0.000279043	0.0375113	0.776487	0.819683	0.238014	0.155396	0.306137	0.900743
PWY-5838	superpathway of menaquinol-8 biosynthesis I	1262	48.3987	0.0313514	0.00061016	0.00334135	0.295245	0.295245	0.126392	0.464099	0.0993651	0.0941203	0.946003	0.00209283	0.368912	0.293532	0.107199	0.168781	0.000148459
PWY-6113	superpathway of mycolate biosynthesis	1262	42.2855	0.0597325	0.000282018	0.00205245	0.295033	0.295033	0.135791	0.454276	0.25803	0.0594416	0.670073	0.0294778	0.296169	0.0295977	0.594111	0.00391625	0.000395069
PWY-6263	superpathway of menaquinol-8 biosynthesis II	1262	29.9417	0.128426	5.54469e-05	0.000676016	0.294548	0.294548	0.151346	0.437751	0.000812212	0.0151069	0.363844	0.279051	0.118617	0.324188	0.184832	0.0314568	0.258607
DTDPRHAMSYN-PWY	dTDP-L-rhamnose biosynthesis I	1262	42.7115	0.0492643	0.000307501	0.0021112	-0.294524	-0.294524	-0.454478	-0.13457	0.653566	0.0105285	0.46215	0.0939523	0.0409952	0.89912	0.679879	0.0705089	8.00447e-06
PROPFERM-PWY	L-alanine fermentation to propanoate and acetate	1202	9.90128	0.726702	3.78441e-06	0.000102402	0.294372	0.294372	0.169567	0.419176	0.0750913	0.21602	0.00822317	0.567909	0.241206	0.233404	0.0097435	0.290385	NA
PWY-5675	nitrate reduction V (assimilatory)	1262	67.6053	0.00270643	0.00671645	0.0186118	0.293945	0.293945	0.0814	0.506491	0.0228033	0.00225592	0.94213	0.00709767	0.00822619	0.0873498	0.770943	0.809404	0.00101755
PWY-5989	stearate biosynthesis II (bacteria and plants)	1262	32.5447	0.0729787	8.559e-05	0.000960278	0.293597	0.293597	0.147107	0.440087	0.228431	0.127017	0.823903	0.00436013	0.196317	0.0764654	0.421963	0.0432237	0.000537695
HEME-BIOSYNTHESIS-II	heme biosynthesis I (aerobic)	1262	51.4373	0.0293866	0.000966369	0.0044453	0.292976	0.292976	0.118977	0.466976	0.0351331	0.0277182	0.984562	0.00475624	0.0443136	0.0712159	0.588428	0.0423604	0.0012775
PWY-6478	GDP-D-glycero-&alpha;-D-manno-heptose biosynthesis	1262	37.5207	0.1305	0.000171624	0.00149227	0.292028	0.292028	0.139702	0.444354	0.0322908	0.104309	0.0878616	0.233601	0.658469	0.0211752	0.00500783	0.621016	0.0136866
PWY-6953	dTDP-3-acetamido-3,6-dideoxy-&alpha;-D-galactose biosynthesis	1262	39.4104	0.0892306	0.000239097	0.00180303	0.290592	0.290592	0.135556	0.445628	0.0542107	0.00972952	0.785419	0.680227	0.170909	0.72889	0.00379912	0.057901	0.00192563
PWY-5861	superpathway of demethylmenaquinol-8 biosynthesis	1262	52.1786	0.0237925	0.00117406	0.00504737	0.290496	0.290496	0.115044	0.465948	0.116824	0.111366	0.99614	0.00225362	0.36105	0.302592	0.110475	0.201654	0.000177852
PWY0-845	superpathway of pyridoxal 5'-phosphate biosynthesis and salvage	1262	54.1034	0.0228176	0.00148688	0.00579633	0.290045	0.290045	0.111122	0.468967	0.0313054	0.000702498	0.386531	0.0264297	0.413649	0.65608	0.0489241	0.270809	0.000663113
GALACTARDEG-PWY	D-galactarate degradation I	1262	32.3053	0.110683	0.000102966	0.00106718	0.289414	0.289414	0.143349	0.435478	0.0257771	0.0779579	0.302821	0.00658408	0.255899	0.0187581	0.202213	0.0415891	0.00244255
GLUCARGALACTSUPER-PWY	superpathway of D-glucarate and D-galactarate degradation	1262	32.3053	0.110683	0.000102966	0.00106718	0.289414	0.289414	0.143349	0.435478	0.0257771	0.0779579	0.302821	0.00658408	0.255899	0.0187581	0.202213	0.0415891	0.00244255
BRANCHED-CHAIN-AA-SYN-PWY	superpathway of branched amino acid biosynthesis	1262	76.4745	0.000370928	0.0227338	0.0458664	-0.288734	-0.288734	-0.537171	-0.0402975	0.018389	0.00051967	0.444667	0.405667	0.982402	0.832662	0.490596	0.320418	1.0878e-06
PWY-6317	galactose degradation I (Leloir pathway)	1262	60.5876	0.00887888	0.00345599	0.0107241	-0.287645	-0.287645	-0.480456	-0.0948338	3.20167e-05	0.000146089	0.0212967	0.357811	0.740684	0.560664	0.0600669	0.338968	0.306576
GLUCARDEG-PWY	D-glucarate degradation I	1262	35.8021	0.0997539	0.000193634	0.00161185	0.285928	0.285928	0.135571	0.436285	0.0357438	0.0758566	0.486047	0.0117173	0.18378	0.0176369	0.134821	0.0361132	0.00341141
PWY-5686	UMP biosynthesis	1262	63.9047	0.00607725	0.00553874	0.015825	-0.285225	-0.285225	-0.486757	-0.0836932	0.314623	0.000824151	0.764231	0.0738637	0.570993	0.0653164	0.506272	0.246064	3.50623e-05
GLYOXYLATE-BYPASS	glyoxylate cycle	1262	54.5377	0.0208562	0.00199514	0.00713561	0.283467	0.283467	0.103722	0.463213	0.0999959	0.0181166	0.814493	0.0040812	0.0295664	0.0352946	0.727936	0.718768	0.0111411
PWY-5897	superpathway of menaquinol-11 biosynthesis	1262	46.2833	0.0362449	0.000793218	0.00396609	0.283029	0.283029	0.117693	0.448365	0.101723	0.162792	1	0.00260965	0.338103	0.275965	0.117262	0.188003	0.000239308
PWY-5898	superpathway of menaquinol-12 biosynthesis	1262	46.2833	0.0362449	0.000793218	0.00396609	0.283029	0.283029	0.117693	0.448365	0.101723	0.162792	1	0.00260965	0.338103	0.275965	0.117262	0.188003	0.000239308
PWY-5899	superpathway of menaquinol-13 biosynthesis	1262	46.2833	0.0362449	0.000793218	0.00396609	0.283029	0.283029	0.117693	0.448365	0.101723	0.162792	1	0.00260965	0.338103	0.275965	0.117262	0.188003	0.000239308
METHANOGENESIS-PWY	methanogenesis from H2 and CO2	1216	5.18567	0.221576	3.44583e-06	0.000102402	0.282555	0.282555	0.16326	0.401849	0.214982	0.0399596	0.670685	NA	0.00185505	0.806338	0.400432	0.148612	0.0110351
COA-PWY	coenzyme A biosynthesis I	1262	58.4078	0.0120941	0.00322235	0.0102226	-0.282248	-0.282248	-0.470046	-0.0944495	0.102996	2.45133e-05	0.305097	0.335248	0.357042	0.299764	0.716446	0.548116	0.00222164
GLYCOLYSIS-TCA-GLYOX-BYPASS	superpathway of glycolysis, pyruvate dehydrogenase, TCA, and glyoxylate bypass	1262	58.1597	0.0123056	0.0032059	0.0102226	0.281746	0.281746	0.0943824	0.46911	0.0454834	0.0216509	0.670224	0.00308507	0.0359426	0.0728553	0.829792	0.843475	0.00674684
PWY0-162	superpathway of pyrimidine ribonucleotides de novo biosynthesis	1262	70.7822	0.00353179	0.0138881	0.0313125	0.280667	0.280667	0.0570635	0.50427	0.105418	0.872516	0.134964	0.569862	0.133332	0.0580797	0.57488	0.077799	2.56819e-07
PWY-4242	pantothenate and coenzyme A biosynthesis III	1262	53.1479	0.0215267	0.00196529	0.00713561	-0.279296	-0.279296	-0.456141	-0.102451	0.0616076	1.04322e-05	0.0667373	0.313604	0.341796	0.364451	0.433478	0.649782	0.0797274
PWY-7219	adenosine ribonucleotides de novo biosynthesis	1262	73.7304	0.00106141	0.0202828	0.0414671	-0.27876	-0.27876	-0.51415	-0.0433692	0.157181	0.00546587	0.953708	0.0352686	0.229041	0.064373	0.852984	0.209627	8.00447e-06
PWY-5198	factor 420 biosynthesis	1216	0.0023053	0.242175	1.66356e-06	6.91367e-05	0.278632	0.278632	0.164634	0.39263	0.636874	0.110537	0.761791	NA	0.00136305	0.623286	0.640002	0.0171653	0.0419262
PWY66-389	phytol degradation	1262	69.4402	0.000843	0.0124401	0.0290291	0.278605	0.278605	0.060131	0.497079	0.00155976	0.00250441	0.40535	0.00823551	0.142826	0.0432516	0.268473	0.734429	0.00357851
TCA-GLYOX-BYPASS	superpathway of glyoxylate bypass and TCA	1262	56.7196	0.0154576	0.00308451	0.00999207	0.278116	0.278116	0.093911	0.462321	0.0480379	0.0247559	0.687946	0.0028703	0.0387072	0.0717687	0.821724	0.831935	0.00674684
PWY-7184	pyrimidine deoxyribonucleotides de novo biosynthesis I	1262	6.81045	0.235295	4.90576e-06	0.000125369	0.277063	0.277063	0.158205	0.39592	0.0592743	0.0125942	0.345514	0.484067	0.176462	0.181551	0.0159937	0.0209725	0.00152468
PWY3O-355	stearate biosynthesis III (fungi)	1262	63.7768	0.00569811	0.00705564	0.019102	0.276452	0.276452	0.0753404	0.477563	0.33478	0.262097	0.857354	0.0862735	0.0434978	0.0134373	0.63533	0.797698	0.000164402
HSERMETANA-PWY	L-methionine biosynthesis III	1262	51.9149	0.0352569	0.00192175	0.00707203	-0.276213	-0.276213	-0.450731	-0.101695	0.000427765	0.000882045	0.965273	0.0775789	0.570993	0.86833	0.187854	0.328285	0.168055
PWY-5863	superpathway of phylloquinol biosynthesis	1262	59.2713	0.0122125	0.00438841	0.0129873	0.276098	0.276098	0.0861437	0.466052	0.130706	0.211003	0.861745	0.00260965	0.345646	0.305581	0.110475	0.279899	0.000186805
PWY-7332	superpathway of UDP-N-acetylglucosamine-derived O-antigen building blocks biosynthesis	1262	64.1742	0.00358405	0.00755569	0.0200903	0.275575	0.275575	0.0733829	0.477768	0.0642455	0.0120971	0.215262	0.357636	0.863412	0.512753	0.166594	0.898037	3.57831e-05
PWY0-1296	purine ribonucleosides degradation	1262	43.8794	0.0671952	0.000853668	0.00404832	-0.274308	-0.274308	-0.435529	-0.113088	0.0763067	3.91806e-05	0.259678	0.20297	0.865705	0.21554	0.0021317	0.593736	0.592002
PWY0-1415	superpathway of heme biosynthesis from uroporphyrinogen-III	1262	57.3474	0.0114774	0.00379762	0.0114928	0.273998	0.273998	0.0884647	0.459531	0.0154726	0.0566825	0.984557	0.00590018	0.0372679	0.161402	0.610859	0.823027	0.00350095
PWY-561	superpathway of glyoxylate cycle and fatty acid degradation	1262	59.7091	0.00994414	0.00489328	0.0142462	0.273953	0.273953	0.083142	0.464765	0.0526172	0.0163758	0.771477	0.00461611	0.0357426	0.0744079	0.800837	0.707241	0.00998148
FASYN-ELONG-PWY	fatty acid elongation -- saturated	1262	18.7997	0.125649	4.30433e-05	0.000638707	0.273545	0.273545	0.142476	0.404614	0.065665	0.0935432	0.782747	0.00321457	0.405256	0.153576	0.481316	0.0474951	0.00254877
GLYCOGENSYNTH-PWY	glycogen biosynthesis I (from ADP-D-Glucose)	1262	61.0164	0.00707966	0.00564928	0.0160412	-0.273518	-0.273518	-0.467227	-0.0798085	0.000613096	6.3613e-05	0.153556	0.630741	0.774265	0.600734	0.000921742	0.449948	0.8315
PWY-7664	oleate biosynthesis IV (anaerobic)	1262	19.3517	0.123641	4.74297e-05	0.000641593	0.273227	0.273227	0.141584	0.40487	0.0735226	0.10248	0.797649	0.00374867	0.357042	0.148029	0.506272	0.0481827	0.00294793
PWY-6282	palmitoleate biosynthesis I (from (5Z)-dodec-5-enoate)	1262	17.3867	0.130615	3.6245e-05	0.000595453	0.273122	0.273122	0.143514	0.402731	0.0831381	0.101163	0.812625	0.00297383	0.349367	0.148029	0.503116	0.0445829	0.00242712
PWY-6284	superpathway of unsaturated fatty acids biosynthesis (E. coli)	1262	51.0578	0.0336587	0.0020228	0.00713561	0.272701	0.272701	0.0995532	0.44585	0.56593	0.130129	0.624851	0.0317612	0.472336	0.0396394	0.723015	0.00195426	0.00113564
P105-PWY	TCA cycle IV (2-oxoglutarate decarboxylase)	1262	55.4989	0.0182799	0.00330982	0.0103851	0.272135	0.272135	0.0905542	0.453716	0.0418276	0.0125308	0.793811	0.012486	0.05656	0.0790788	0.653601	0.556872	0.0123873
GLYCOL-GLYOXDEG-PWY	superpathway of glycol metabolism and degradation	1262	64.8016	0.00483156	0.00897643	0.0223523	0.271817	0.271817	0.067928	0.475705	0.0197844	0.0962159	0.872799	0.00064621	0.00919217	0.00706344	0.93585	0.73095	0.0053774
PWY-4981	L-proline biosynthesis II (from arginine)	1262	73.2325	0.00121035	0.0240991	0.0479896	0.268395	0.268395	0.0351723	0.501618	0.0360505	1	0.0173087	0.418192	0.158123	0.883703	0.167219	0.427838	1.4913e-06
COA-PWY-1	coenzyme A biosynthesis II (mammalian)	1262	48.3208	0.0417206	0.00179161	0.00664628	-0.268062	-0.268062	-0.436308	-0.0998164	0.00732888	9.43808e-05	0.381247	0.273082	0.137245	0.036606	0.564816	0.420758	0.328035
PWY-6318	L-phenylalanine degradation IV (mammalian, via side chain)	1262	0	0.876227	2.62027e-06	9.27172e-05	0.267747	0.267747	0.156058	0.379436	0.00886793	0.0338691	0.145258	0.535407	0.886641	0.325084	0.0554404	0.0216931	0.432618
PWY0-862	(5Z)-dodec-5-enoate biosynthesis	1262	16.4253	0.128014	4.72274e-05	0.000641593	0.266977	0.266977	0.138377	0.395577	0.0782101	0.125457	0.850355	0.00374867	0.36482	0.151707	0.528654	0.0509268	0.00288352
PWYG-321	mycolate biosynthesis	1262	12.2566	0.125604	2.86163e-05	0.000506288	0.265513	0.265513	0.141141	0.389884	0.0831381	0.1559	0.835217	0.0151941	0.36482	0.144419	0.519	0.0260101	0.000619209
ORNDEG-PWY	superpathway of ornithine degradation	1262	60.3389	0.00821909	0.00765511	0.020122	0.261503	0.261503	0.0693196	0.453686	0.0371811	0.0187302	0.567258	0.00649488	0.0565514	0.0412448	0.571765	0.863108	0.00905473
PWY-7385	1,3-propanediol biosynthesis (engineered)	1262	34.66	0.129668	0.000576249	0.00319367	0.261201	0.261201	0.11249	0.409912	0.113546	0.0388227	0.53779	0.0668046	0.0170493	0.0277258	0.624841	0.33188	0.0106336
PWY-5747	2-methylcitrate cycle II	1262	61.385	0.00971823	0.00940066	0.0230016	0.258059	0.258059	0.0633108	0.452808	0.0574281	0.0508264	0.827435	0.0471334	0.173375	0.0140615	0.757369	0.488149	0.000319215
PWY-5791	1,4-dihydroxy-2-naphthoate biosynthesis II (plants)	1262	53.0878	0.023657	0.00440439	0.0129873	0.257051	0.257051	0.0801293	0.433973	0.141162	0.213312	0.75686	0.00348026	0.353295	0.281739	0.114964	0.226726	0.000477363
PWY-5837	1,4-dihydroxy-2-naphthoate biosynthesis I	1262	53.0878	0.023657	0.00440439	0.0129873	0.257051	0.257051	0.0801293	0.433973	0.141162	0.213312	0.75686	0.00348026	0.353295	0.281739	0.114964	0.226726	0.000477363
PWY-5705	allantoin degradation to glyoxylate III	1262	48.9936	0.0397824	0.0030479	0.00994351	0.256074	0.256074	0.0866786	0.42547	0.217617	0.0169569	0.833809	0.137653	0.0343573	0.00928514	0.32037	0.993809	0.00182767
PWY-6803	phosphatidylcholine acyl editing	1262	47.0337	0.0432968	0.00258152	0.00859109	0.255628	0.255628	0.0893757	0.421881	0.0424142	0.0607552	0.844635	0.00355917	0.0890085	0.196544	0.871632	0.456782	0.00549117
PWY0-42	2-methylcitrate cycle I	1262	59.5128	0.0119912	0.0088587	0.0222678	0.254034	0.254034	0.0638122	0.444255	0.069471	0.0464161	0.988372	0.0371563	0.0878517	0.0353341	0.625082	0.574873	0.000444177
PWY-6628	superpathway of L-phenylalanine biosynthesis	1262	18.1742	0.279254	0.000132656	0.00127129	0.253861	0.253861	0.12366	0.384062	0.0985975	0.0307112	0.564715	0.00480402	0.0560039	0.0370331	0.283807	0.237579	0.187721
PWY-7383	anaerobic energy metabolism (invertebrates, cytosol)	1262	56.9789	0.0211271	0.00705419	0.019102	0.253686	0.253686	0.0691409	0.438231	0.0399997	0.383462	0.0941701	0.964816	0.0440923	0.100683	0.280252	0.117626	0.00389574
PWY-6125	superpathway of guanosine nucleotides de novo biosynthesis II	1262	37.2386	0.100481	0.00107299	0.00480378	0.253558	0.253558	0.101611	0.405504	0.0699402	0.0137557	0.381247	0.457076	0.26541	0.113413	0.00387205	0.286724	0.0130741
P441-PWY	superpathway of N-acetylneuraminate degradation	1262	35.5307	0.0718859	0.000949853	0.00441346	0.252777	0.252777	0.102872	0.402683	0.0739749	0.133407	0.698752	0.0440067	0.581051	0.0282246	0.402249	0.0777989	0.00124456
P164-PWY	purine nucleobases degradation I (anaerobic)	1262	58.5721	0.0162174	0.00850956	0.0216433	0.252641	0.252641	0.0644469	0.440834	0.532017	0.202569	0.165021	0.466636	0.675019	0.0296566	0.903635	0.013617	1.39934e-05
PWY66-399	gluconeogenesis III	1262	22.331	0.154682	0.000234758	0.00180303	0.252594	0.252594	0.118002	0.387187	0.0333696	0.444534	0.077444	0.808308	0.0843231	0.792321	0.0772878	0.0566583	0.00292268
PWY-5367	petroselinate biosynthesis	1262	59.2136	0.0133141	0.00898951	0.0223523	0.252569	0.252569	0.0630818	0.442056	0.669905	0.248171	0.611206	0.0490159	0.672792	0.0274916	0.682569	0.00212284	0.00133524
PWY-7286	7-(3-amino-3-carboxypropyl)-wyosine biosynthesis	1216	0.0233174	0.244288	1.5056e-05	0.000329509	0.251543	0.251543	0.137626	0.365459	0.499498	0.0573714	0.541565	NA	0.00181087	0.923725	0.305629	0.161838	0.0110351
PWY-724	superpathway of L-lysine, L-threonine and L-methionine biosynthesis II	1262	62.4275	0.00758356	0.0126795	0.0291628	-0.250797	-0.250797	-0.447999	-0.0535959	0.00942335	5.13639e-05	0.614889	0.254199	0.877288	0.0682152	0.551529	0.293334	0.643768
PWY-7228	superpathway of guanosine nucleotides de novo biosynthesis I	1262	31.8606	0.147517	0.000789149	0.00396609	0.24862	0.24862	0.103446	0.393794	0.0322091	0.00590442	0.350484	0.569862	0.229041	0.114902	0.0049644	0.260649	0.04962
TCA	TCA cycle I (prokaryotic)	1262	40.92	0.0889239	0.00203142	0.00713561	0.247038	0.247038	0.0901203	0.403956	0.105418	0.077548	0.969129	0.236227	0.0626292	0.196882	0.454061	0.254234	0.00485365
PWY-7197	pyrimidine deoxyribonucleotide phosphorylation	1262	0.00366719	0.381886	1.57591e-05	0.000329509	0.246156	0.246156	0.134419	0.357893	0.191324	0.0115203	0.504399	0.646375	0.176462	0.279054	0.0395707	0.0171242	0.0105015
PWY-6167	flavin biosynthesis II (archaea)	1216	5.8099	0.148481	5.68603e-05	0.000676016	0.246072	0.246072	0.126262	0.365882	0.433738	0.18467	0.781898	NA	0.000582765	0.516394	0.490384	0.0995338	0.0110351
KDO-NAGLIPASYN-PWY	superpathway of (Kdo)2-lipid A biosynthesis	1262	45.7741	0.0500096	0.00331873	0.0103851	0.246009	0.246009	0.081814	0.410204	0.140636	0.138163	0.934291	0.0140409	0.0586866	0.144843	0.242133	0.692345	0.00121071
PWY-6630	superpathway of L-tyrosine biosynthesis	1262	38.7471	0.0982662	0.00173889	0.00655649	0.245875	0.245875	0.0919874	0.399763	0.0418276	0.0669886	0.567911	0.0252943	0.0755824	0.023026	0.365957	0.706221	0.0353278
FASYN-INITIAL-PWY	superpathway of fatty acid biosynthesis initiation (E. coli)	1262	24.8853	0.0697826	0.000526397	0.00302578	0.243196	0.243196	0.10571	0.380681	0.11167	0.661864	0.823903	0.00469777	0.334329	0.153572	0.578254	0.0524864	0.000537695
GLYCOLYSIS-E-D	superpathway of glycolysis and Entner-Doudoroff	1262	55.5856	0.021238	0.0091066	0.0225217	0.241566	0.241566	0.0600262	0.423106	0.00337339	0.0229179	0.946004	0.303128	0.675019	0.0967028	0.841373	0.286379	0.000690776
PWY-4702	phytate degradation I	1262	53.9325	0.0228489	0.00804452	0.0209067	0.241007	0.241007	0.0627691	0.419244	0.0547877	0.0442673	0.84618	0.0544167	0.0545195	0.0036354	0.60264	0.781589	0.00382584
KETOGLUCONMET-PWY	ketogluconate metabolism	1262	52.2363	0.0213199	0.00705944	0.019102	0.240737	0.240737	0.0655956	0.415878	0.114187	0.425949	0.82756	0.00728251	0.137675	0.0520762	0.104808	0.656392	0.00246672
DENOVOPURINE2-PWY	superpathway of purine nucleotides de novo biosynthesis II	1262	24.5004	0.155345	0.000571112	0.00319367	0.240538	0.240538	0.103688	0.377388	0.187492	0.0675465	0.378622	0.982581	0.246764	0.103409	0.00734351	0.404652	0.00246773
FUC-RHAMCAT-PWY	superpathway of fucose and rhamnose degradation	1262	53.5784	0.0249818	0.00851618	0.0216433	0.238563	0.238563	0.0608379	0.416288	0.348555	0.0027135	0.298304	0.039437	0.149504	0.591698	0.0642196	0.0605272	0.000520935
PWY-6349	CDP-archaeol biosynthesis	1216	0.00283616	0.173417	4.70739e-05	0.000641593	0.236446	0.236446	0.122574	0.350319	0.332623	0.124822	0.422058	NA	0.00121445	0.916038	0.756566	0.246086	0.0424881
PWY-5855	ubiquinol-7 biosynthesis (prokaryotic)	1262	30.8445	0.134993	0.0014022	0.00560879	0.234685	0.234685	0.090682	0.378688	0.0177538	0.0820189	0.644735	0.00160924	0.0483509	0.130912	0.139423	0.691142	0.0748259
PWY-5856	ubiquinol-9 biosynthesis (prokaryotic)	1262	30.8445	0.134993	0.0014022	0.00560879	0.234685	0.234685	0.090682	0.378688	0.0177538	0.0820189	0.644735	0.00160924	0.0483509	0.130912	0.139423	0.691142	0.0748259
PWY-5857	ubiquinol-10 biosynthesis (prokaryotic)	1262	30.8445	0.134993	0.0014022	0.00560879	0.234685	0.234685	0.090682	0.378688	0.0177538	0.0820189	0.644735	0.00160924	0.0483509	0.130912	0.139423	0.691142	0.0748259
PWY-6708	ubiquinol-8 biosynthesis (prokaryotic)	1262	30.8445	0.134993	0.0014022	0.00560879	0.234685	0.234685	0.090682	0.378688	0.0177538	0.0820189	0.644735	0.00160924	0.0483509	0.130912	0.139423	0.691142	0.0748259
PWY-841	superpathway of purine nucleotides de novo biosynthesis I	1262	20.6128	0.243623	0.000532801	0.00302578	0.234351	0.234351	0.101742	0.366961	0.11688	0.0296963	0.33571	0.861332	0.191208	0.106193	0.00712948	0.358593	0.0243355
FOLSYN-PWY	superpathway of tetrahydrofolate biosynthesis and salvage	1262	37.9939	0.0570205	0.00270241	0.00887935	0.23425	0.23425	0.0811944	0.387305	0.661771	0.94732	0.980703	0.00865276	0.952737	0.155437	0.192849	0.00758484	0.0011074
PWY-7446	sulfoglycolysis	1262	51.047	0.0314751	0.00803603	0.0209067	0.233837	0.233837	0.0609251	0.406749	0.430103	0.0913085	0.918246	0.00309977	0.0803533	0.015718	0.687967	0.830356	0.00811287
P23-PWY	reductive TCA cycle I	1262	0	0.593646	4.08556e-05	0.000638707	0.233695	0.233695	0.12205	0.345341	0.0392679	0.355029	0.30469	0.041685	0.10879	0.0779126	0.766068	0.217212	0.0565084
PWY-7254	TCA cycle VII (acetate-producers)	1262	35.6221	0.0980777	0.00224661	0.0078291	0.23362	0.23362	0.0837649	0.383475	0.159239	0.0361417	0.876879	0.00471737	0.0532765	0.0998816	0.583716	0.663019	0.0298329
PWY0-166	superpathway of pyrimidine deoxyribonucleotides de novo biosynthesis (E. coli)	1262	17.6984	0.133018	0.000415253	0.00258594	0.233616	0.233616	0.103912	0.36332	0.547037	0.165279	0.204997	0.759794	0.0647888	0.873449	0.0240789	0.0240817	0.00024197
NAGLIPASYN-PWY	lipid IVA biosynthesis	1262	62.9102	0.00723981	0.021492	0.043552	0.232745	0.232745	0.0343429	0.431147	0.00487723	0.00163198	0.873165	0.0352686	0.958954	0.732868	0.795298	0.295091	0.00453032
UBISYN-PWY	superpathway of ubiquinol-8 biosynthesis (prokaryotic)	1262	32.1798	0.116634	0.0017788	0.00664628	0.232143	0.232143	0.0865399	0.377747	0.0382208	0.102111	0.651256	0.00148932	0.144253	0.223833	0.177722	0.56366	0.0159799
PWY-6612	superpathway of tetrahydrofolate biosynthesis	1262	29.8775	0.074741	0.00146503	0.00575995	0.232099	0.232099	0.0891152	0.375082	0.686668	0.982429	1	0.00810349	0.964543	0.155437	0.191165	0.00738044	0.00116888
PWY-6629	superpathway of L-tryptophan biosynthesis	1262	41.0419	0.0690546	0.00379667	0.0114928	0.231967	0.231967	0.0748985	0.389035	0.0785275	0.0294087	0.915057	0.010554	0.0835159	0.0393019	0.314609	0.562572	0.0299304
PWY-5692	allantoin degradation to glyoxylate II	1262	56.5635	0.0148896	0.0143922	0.031829	0.22917	0.22917	0.0456367	0.412703	0.541283	0.0469485	0.821084	0.155631	0.0289837	0.0117403	0.209144	0.700969	0.00021491
URDEGR-PWY	superpathway of allantoin degradation in plants	1262	56.5635	0.0148896	0.0143922	0.031829	0.22917	0.22917	0.0456367	0.412703	0.541283	0.0469485	0.821084	0.155631	0.0289837	0.0117403	0.209144	0.700969	0.00021491
PWY-5656	mannosylglycerate biosynthesis I	1262	55.8144	0.0199349	0.013601	0.0308199	0.229063	0.229063	0.0471254	0.411	0.0700104	0.0443511	0.697074	0.0723871	0.139919	0.00296151	0.684839	0.988237	0.00552562
PWY-6823	molybdenum cofactor biosynthesis	1262	43.0966	0.0624316	0.005079	0.0146939	0.228731	0.228731	0.0687354	0.388727	0.182121	0.0362	0.89596	0.00828642	0.327628	0.0700686	0.177088	0.912777	0.00406983
PWY-7187	pyrimidine deoxyribonucleotides de novo biosynthesis II	1262	49.2069	0.0354043	0.00833765	0.0214264	0.22848	0.22848	0.0587308	0.39823	0.990934	0.407962	0.1104	0.965171	0.0526934	0.847911	0.0372594	0.0559211	4.06259e-05
COBALSYN-PWY	adenosylcobalamin salvage from cobinamide I	1262	63.3724	0.00622704	0.0248783	0.0493277	-0.228413	-0.228413	-0.427978	-0.0288481	0.129298	0.00300727	0.0184781	0.555083	0.26541	0.609811	1.156e-05	0.338197	0.154689
PWY-7388	octanoyl-[acyl-carrier protein] biosynthesis (mitochondria, yeast)	1262	32.9459	0.0573074	0.00239633	0.00810523	0.22723	0.22723	0.0805425	0.373917	0.11167	0.599279	0.876977	0.00585344	0.502971	0.157355	0.683503	0.0975673	0.00082906
PWY0-1241	ADP-L-glycero-&beta;-D-manno-heptose biosynthesis	1262	39.52	0.094281	0.00410644	0.0123462	0.226634	0.226634	0.0718552	0.381413	0.00277929	0.0704289	0.0192124	0.335248	0.0605287	0.987033	0.24855	0.683071	0.911708
PWY0-41	allantoin degradation IV (anaerobic)	1262	42.979	0.0711423	0.0054488	0.0156653	0.226538	0.226538	0.0667793	0.386297	0.297465	0.0259221	0.667867	0.0659607	0.0796514	0.00970141	0.204276	0.828749	0.00356235
ENTBACSYN-PWY	enterobactin biosynthesis	1262	24.6518	0.173905	0.001287	0.0054314	0.224923	0.224923	0.0879673	0.361878	0.0943056	0.00964556	0.98444	0.033406	0.143221	0.0450692	0.541866	0.355688	0.0164115
PWY66-367	ketogenesis	1262	19.871	0.371893	0.000877052	0.00411677	0.223574	0.223574	0.0918748	0.355273	0.297833	0.17298	0.0735892	0.697515	0.985908	0.153704	0.00123154	0.28422	0.160802
NONMEVIPP-PWY	methylerythritol phosphate pathway I	1262	49.2537	0.043849	0.0103394	0.0250322	-0.221875	-0.221875	-0.391462	-0.0522878	0.00683427	0.00555872	0.942107	0.149081	0.177529	0.647002	0.878121	0.64349	0.0152684
PWY-5030	L-histidine degradation III	1262	56.1824	0.0167848	0.0178976	0.0374223	0.220694	0.220694	0.0380074	0.403381	0.00446296	0.0158115	0.204997	0.310365	0.212231	0.173198	0.0580755	0.681391	0.00208964
PWY-6609	adenine and adenosine salvage III	1262	0.00129854	0.216086	0.000109038	0.00106718	-0.220548	-0.220548	-0.332258	-0.108838	0.443105	0.0387208	0.691603	0.140641	0.611704	0.06252	0.354154	0.0621675	0.00259973
PWY-7094	fatty acid salvage	1262	19.2976	0.232954	0.00113517	0.00492621	0.217931	0.217931	0.0866937	0.349169	0.0802699	0.0420386	0.855122	0.0040711	0.00967804	0.298429	0.231456	0.994142	0.0332889
SULFATE-CYS-PWY	superpathway of sulfate assimilation and cysteine biosynthesis	1262	46.8788	0.0534183	0.0101414	0.0246828	0.217349	0.217349	0.0516543	0.383044	0.320067	0.0791217	0.892251	0.0323731	0.0345198	0.0200642	0.338802	0.886486	0.111937
PWY-5028	L-histidine degradation II	1137	0	0.934757	0.000290021	0.00205245	0.217334	0.217334	0.0997954	0.334873	0.865555	0.65905	0.667728	0.110244	0.623855	0.326707	NA	0.105462	0.0110351
OANTIGEN-PWY	O-antigen building blocks biosynthesis (E. coli)	1262	54.703	0.0153857	0.0178011	0.0373904	-0.21712	-0.21712	-0.396696	-0.0375436	0.0562779	0.00288645	0.820139	0.282867	0.284989	0.00677422	0.430583	0.922792	0.0295869
SO4ASSIM-PWY	sulfate reduction I (assimilatory)	1262	43.4987	0.0730985	0.00813169	0.0210145	0.216689	0.216689	0.0562152	0.377164	0.241817	0.0670522	0.903736	0.0402149	0.0297589	0.0214997	0.348881	0.935507	0.185706
PWY-5667	CDP-diacylglycerol biosynthesis I	1262	55.3355	0.0194024	0.018943	0.0394288	-0.216551	-0.216551	-0.397419	-0.0356839	0.00576149	0.00432098	0.0189649	0.678101	0.466087	0.100683	0.931086	0.185998	0.115852
PWY-6749	CMP-legionaminate biosynthesis I	1262	21.4613	0.0995896	0.00153137	0.00591959	0.216031	0.216031	0.0824061	0.349655	0.326329	0.552403	0.52358	0.00146218	0.850572	0.417553	0.0371634	0.385073	0.00369972
PWY0-1319	CDP-diacylglycerol biosynthesis II	1262	55.3756	0.0192927	0.0193563	0.0399278	-0.215901	-0.215901	-0.396846	-0.0349556	0.0058625	0.00432098	0.0192124	0.678101	0.457103	0.102039	0.931086	0.18855	0.115852
P221-PWY	octane oxidation	1262	39.9419	0.0924116	0.00698398	0.019102	0.21389	0.21389	0.0584869	0.369294	0.0217269	0.0211489	0.7878	0.00447134	0.0533149	0.0225144	0.548857	0.347231	0.338911
PWY-5083	NAD/NADH phosphorylation and dephosphorylation	1262	42.4258	0.0592749	0.00860527	0.0217496	0.213168	0.213168	0.0541479	0.372188	0.0724476	0.00761663	0.99228	0.0373043	0.727247	0.899115	0.636972	0.0572046	0.00261166
PWY-6270	isoprene biosynthesis I	1262	39.6747	0.111661	0.00734451	0.0196423	-0.211907	-0.211907	-0.366835	-0.0569798	0.00683427	0.00726139	0.911336	0.149081	0.177529	0.647002	0.89766	0.75591	0.0762555
PWY-7039	phosphatidate metabolism, as a signaling molecule	1262	0	0.710649	0.00019973	0.00161185	0.211682	0.211682	0.100133	0.32323	0.324307	0.440843	0.983766	0.0112034	0.190122	0.239997	0.192853	0.0570637	0.0110351
P122-PWY	heterolactic fermentation	1262	48.1187	0.0288316	0.0142506	0.0318218	0.209955	0.209955	0.0420545	0.377855	0.236861	0.781689	0.961305	0.00293959	0.164145	0.0417037	0.224648	0.91895	0.0206856
LPSSYN-PWY	superpathway of lipopolysaccharide biosynthesis	1262	56.3019	0.0220622	0.0253986	0.049929	0.20851	0.20851	0.0256823	0.391338	0.377265	0.0857125	0.685477	0.113346	0.0639247	0.0143467	0.514017	0.46114	0.00429908
AST-PWY	L-arginine degradation II (AST pathway)	1262	35.2525	0.100012	0.00620582	0.0174066	0.208441	0.208441	0.0591603	0.357721	0.108855	0.0557167	0.737476	0.00194896	0.11866	0.102442	0.411862	0.664887	0.0561425
PWY-5101	L-isoleucine biosynthesis II	1262	0.00303551	0.343751	0.000303288	0.0021112	0.205734	0.205734	0.094112	0.317355	0.38999	0.30953	0.806767	0.382733	0.00474641	0.812638	0.158435	0.465974	0.700105
PWY-5004	superpathway of L-citrulline metabolism	1262	0.00704908	0.274793	0.000339482	0.00226322	0.204092	0.204092	0.0924544	0.315729	0.381917	0.00548918	0.318817	0.596487	0.059297	0.608413	0.234342	0.0871601	0.00732353
ARGORNPROST-PWY	arginine, ornithine and proline interconversion	1262	0.00181669	0.266416	0.000415998	0.00258594	0.201054	0.201054	0.0894137	0.312694	0.562091	0.177066	0.489074	0.00502318	0.176462	0.371363	0.535138	0.296407	0.00854736
FUCCAT-PWY	fucose degradation	1262	8.06477e-06	0.0787009	0.000422674	0.0025924	0.200991	0.200991	0.0892525	0.31273	0.562265	0.366527	0.328476	0.128996	0.632523	0.792321	0.101388	0.0431445	7.74531e-05
PWY0-1297	superpathway of purine deoxyribonucleosides degradation	1262	0.00402347	0.296867	0.000449326	0.00271961	0.19986	0.19986	0.0882365	0.311484	0.477612	0.531236	0.402649	0.0447647	0.396965	0.0855118	0.0896096	0.0469001	0.0101406
PWY-6572	chondroitin sulfate degradation I (bacterial)	1262	16.2372	0.148513	0.00226653	0.00783912	0.199519	0.199519	0.0714269	0.327611	0.0750591	0.369251	0.237572	0.756647	0.945482	0.392911	0.208695	0.320255	0.000144071
PWY-6174	mevalonate pathway II (archaea)	1156	0	0.646383	0.000829842	0.00404832	0.198755	0.198755	0.0822148	0.315296	0.452175	0.051406	0.600364	NA	0.091196	0.464882	0.157711	0.149433	NA
PWY-6415	L-ascorbate biosynthesis V	1262	0.0144262	0.153415	0.000508542	0.00296113	0.198092	0.198092	0.0864034	0.30978	0.746662	0.811558	0.343918	0.442714	0.000679858	0.130664	0.901733	0.271149	0.160802
PWY-7616	methanol oxidation to carbon dioxide	1262	5.42462	0.308021	0.000977116	0.00445023	0.197088	0.197088	0.0799265	0.314249	0.582744	0.188931	0.358566	0.00569305	0.0508622	0.0200289	0.912083	0.147536	0.108783
PWY-821	superpathway of sulfur amino acid biosynthesis (Saccharomyces cerevisiae)	1262	29.6818	0.106641	0.00724313	0.0194845	0.195318	0.195318	0.0527662	0.33787	0.455692	0.0743111	0.720274	0.00343517	0.0204054	0.0391094	0.576655	0.749446	0.151885
ECASYN-PWY	enterobacterial common antigen biosynthesis	1262	4.90616	0.285092	0.00120542	0.00513421	0.192657	0.192657	0.0760269	0.309287	0.0801774	0.0615826	0.957403	0.00806043	0.152442	0.206011	0.328639	0.358564	0.13055
PWY-6837	fatty acid beta-oxidation V (unsaturated, odd number, di-isomerase-dependent)	1262	31.7951	0.124393	0.00938478	0.0230016	0.192127	0.192127	0.0471677	0.337086	0.11432	0.0250385	0.767555	0.00326279	0.19341	0.272013	0.803607	0.91513	0.115229
PWY-7208	superpathway of pyrimidine nucleobases salvage	1262	0	0.767991	0.000746757	0.00394837	0.191767	0.191767	0.0802967	0.303237	0.0449141	0.426019	0.235937	0.861332	0.191208	0.389014	0.0325761	0.122263	0.224366
PWY-6168	flavin biosynthesis III (fungi)	1262	0.00293303	0.322318	0.000784121	0.00396609	-0.191187	-0.191187	-0.302766	-0.0796083	0.23285	0.10381	0.289405	0.827148	0.512424	0.718237	0.0850389	0.00489788	0.105812
ARG+POLYAMINE-SYN	superpathway of arginine and polyamine biosynthesis	1262	47.1125	0.0567542	0.0251446	0.0496416	0.189598	0.189598	0.0236417	0.355555	0.302477	0.0214499	0.614889	0.0668609	0.0440923	0.107607	0.402249	0.360995	0.0573903
PWY-7031	protein N-glycosylation (bacterial)	1202	33.4809	0.134108	0.0139545	0.0313125	0.188815	0.188815	0.0382838	0.339346	0.323287	0.00323012	0.484554	0.200802	0.24401	0.575883	0.0016456	0.992466	NA
CALVIN-PWY	Calvin-Benson-Bassham cycle	1262	38.0926	0.111841	0.0154778	0.033359	-0.188621	-0.188621	-0.341323	-0.0359196	0.0150345	0.000104701	0.771622	0.947777	0.970675	0.31517	0.146953	0.782353	0.286055
PWY-7560	methylerythritol phosphate pathway II	1262	39.1797	0.11332	0.0176313	0.0372037	-0.186665	-0.186665	-0.340823	-0.0325079	0.0162606	0.00959216	0.961386	0.168921	0.172814	0.397174	0.909414	0.979892	0.0301098
PWY-7294	xylose degradation IV	1262	36.4092	0.0796154	0.0155192	0.033359	0.186088	0.186088	0.0353768	0.336799	0.277781	0.714609	0.904464	0.016944	0.0817062	0.319672	0.10172	0.346382	0.00585353
PWY-2221	Entner-Doudoroff pathway III (semi-phosphorylative)	1262	0	0.893849	0.00108837	0.00481393	0.185701	0.185701	0.0742812	0.297121	0.920402	0.0200018	0.229925	0.110244	0.623855	0.326707	0.954671	0.0110609	1
P124-PWY	Bifidobacterium shunt	1262	37.4598	0.129515	0.0191638	0.0397087	-0.181434	-0.181434	-0.33325	-0.0296176	0.0680853	0.0228992	0.745653	0.119355	0.390109	0.901654	0.322485	0.661993	0.109557
PWY-5173	superpathway of acetyl-CoA biosynthesis	1262	31.3849	0.108837	0.0148038	0.0321215	0.179637	0.179637	0.035172	0.324102	0.0932055	0.937235	0.842777	0.0116238	0.109364	0.0605036	0.633841	0.600614	0.0608305
PWY-6165	chorismate biosynthesis II (archaea)	1216	24.9818	0.239237	0.012628	0.0291628	0.17702	0.17702	0.0379101	0.31613	0.32778	0.109579	0.880184	NA	0.026982	0.784008	0.866962	0.763908	0.081523
PWY66-398	TCA cycle III (animals)	1262	0	0.95213	0.00197722	0.00713561	0.17579	0.17579	0.0644186	0.287161	0.0520817	0.0141679	0.594571	0.751386	0.467268	0.520032	0.242102	0.0968225	0.819564
THISYNARA-PWY	superpathway of thiamin diphosphate biosynthesis III (eukaryotes)	1262	0.00586659	0.239663	0.0020321	0.00713561	-0.175649	-0.175649	-0.287224	-0.0640737	0.453305	0.0764965	0.211997	0.930407	0.00593083	0.782317	0.129869	0.0851366	0.358101
ALLANTOINDEG-PWY	superpathway of allantoin degradation in yeast	1262	30.5715	0.104396	0.0170575	0.0361588	0.174625	0.174625	0.0311482	0.318101	0.38524	0.0465013	0.323903	0.874684	0.469874	0.122135	0.726603	0.125485	0.00129908
PWY-5022	4-aminobutanoate degradation V	1262	23.6481	0.136904	0.0120671	0.0286127	0.173801	0.173801	0.038096	0.309507	0.923058	0.00875008	0.419163	0.335248	0.388775	0.90942	0.966495	0.124489	0.000666132
PWY0-1338	polymyxin resistance	1262	28.8656	0.139798	0.016559	0.0352646	0.172944	0.172944	0.0314943	0.314395	0.116004	0.114723	0.846064	0.00263163	0.311478	0.134305	0.923789	0.467485	0.169517
PWY0-1298	superpathway of pyrimidine deoxyribonucleosides degradation	1262	0.00229406	0.281094	0.002596	0.00859109	0.171429	0.171429	0.0598742	0.282985	0.231707	0.661864	0.376008	0.0959065	0.0716323	0.42959	0.84524	0.256787	0.0168265
PWY-6435	4-hydroxybenzoate biosynthesis V	1262	13.8045	0.205349	0.00764909	0.020122	-0.170776	-0.170776	-0.29627	-0.0452821	0.0171379	0.178103	0.817142	0.00214423	0.548163	0.689881	0.987785	0.276483	0.581979
PWY-7391	isoprene biosynthesis II (engineered)	1262	0	0.528737	0.00358715	0.0110006	0.16562	0.16562	0.0541607	0.27708	0.368927	0.155891	1	0.382733	0.171562	0.754061	0.0722707	0.0541484	0.160802
PWY-5345	superpathway of L-methionine biosynthesis (by sulfhydrylation)	1262	30.1359	0.179074	0.0230447	0.0462908	0.16561	0.16561	0.0227884	0.308432	0.306436	0.178062	0.790182	0.0980333	0.0308928	0.0222504	0.353991	0.965293	0.222509
PWY0-1061	superpathway of L-alanine biosynthesis	1262	12.606	0.401439	0.0118095	0.0281469	-0.15947	-0.15947	-0.283609	-0.0353311	0.0117485	0.0336889	0.106148	0.675206	0.622077	0.994813	0.0453489	0.599553	0.539194
PWY-7245	superpathway NAD/NADP - NADH/NADPH interconversion (yeast)	1202	0.00238764	0.342357	0.00646787	0.0180316	0.158737	0.158737	0.044484	0.27299	0.124271	0.440843	0.707892	0.035454	NA	0.0911689	0.142508	0.0808536	0.0995455
PWY0-1533	methylphosphonate degradation I	1262	0.00122202	0.312533	0.00583815	0.0164758	0.156832	0.156832	0.0453287	0.268335	0.118199	0.0544239	0.690997	0.0980283	0.450334	0.137831	0.981095	0.346686	0.025794
PWY-5121	superpathway of geranylgeranyl diphosphate biosynthesis II (via MEP)	1262	14.2999	0.401056	0.0236836	0.0473672	-0.145211	-0.145211	-0.27102	-0.0194019	0.02343	0.0200279	0.628283	0.389129	0.0540685	0.593044	0.976321	0.832438	0.332451
PWY-5180	toluene degradation I (aerobic) (via o-cresol)	1262	0	0.55191	0.0109557	0.0263855	0.144607	0.144607	0.0332027	0.256011	0.963523	0.0173805	0.639882	0.41673	0.604267	0.174091	0.600288	0.736982	0.333711
PWY-5464	superpathway of cytosolic glycolysis (plants), pyruvate dehydrogenase and TCA cycle	1262	0	0.697225	0.0112741	0.0270109	0.143999	0.143999	0.0326245	0.255374	0.0314726	0.761862	0.245632	0.365371	0.220772	0.116613	0.459011	0.304163	0.254936
PWY-7268	NAD/NADP-NADH/NADPH cytosolic interconversion (yeast)	1202	0.00137368	0.332285	0.0144723	0.031853	0.142502	0.142502	0.0282844	0.25672	0.120399	0.440843	0.676833	0.0384756	NA	0.0911689	0.142508	0.179415	0.548146
PWY-7003	glycerol degradation to butanol	1262	0	0.558714	0.0133243	0.0303425	0.140675	0.140675	0.029273	0.252077	0.452792	0.857663	0.0375059	0.203034	0.259091	0.713342	0.279146	0.243071	0.382213
PWY-6876	isopropanol biosynthesis	1262	0.00548607	0.267121	0.0145508	0.0318732	0.13898	0.13898	0.0274963	0.250463	0.0151368	0.0443583	0.802614	0.238297	0.885546	0.608039	0.276818	0.777274	0.0398571
PWY-622	starch biosynthesis	1262	0.00876268	0.359477	0.0146807	0.0320052	-0.138764	-0.138764	-0.250221	-0.0273074	0.055295	0.0330713	0.864044	0.0235579	0.295086	0.968454	0.944376	0.767445	0.689952
PWY-5182	toluene degradation II (aerobic) (via 4-methylcatechol)	1262	0	0.423952	0.0161024	0.0344515	0.136809	0.136809	0.0253896	0.248229	0.617955	0.0173805	0.639882	0.41673	0.380084	0.174091	0.920299	0.874454	0.160802
AEROBACTINSYN-PWY	aerobactin biosynthesis	1262	2.46836	0.606619	0.0209917	0.0427265	0.134152	0.134152	0.0202361	0.248068	0.556188	0.406679	0.699554	0.0185315	0.989995	0.179713	0.160481	0.323535	0.0337397
PWY66-409	superpathway of purine nucleotide salvage	1262	0	0.674874	0.0194481	0.0399381	0.132769	0.132769	0.0214118	0.244126	0.314623	0.666434	0.790188	0.60418	0.502971	0.433396	0.578254	0.0297491	0.0679484

## Sheet: meta_analysis_humann3_genefamil
UniRef90 ID	Number_Samples	I^2	P-value Fit	Pvalue	Standard Error	Coefficient	Confidence Interval Lower Limit	Confidence Interval Upper Limit	PvalueAdjusted
UniRef90_A8SIA8	1262	0	0.551673	9.72649e-32	0.685096	0.685096	0.570554	0.799637	7.90321e-26
UniRef90_K4Q910	1262	0	0.767041	9.49316e-31	0.672658	0.672658	0.558298	0.787018	3.85681e-25
UniRef90_T1ZEL6	1262	0	0.793273	3.95193e-28	0.640004	0.640004	0.525938	0.754071	1.07037e-22
UniRef90_A0A137STD8	1262	0	0.809802	1.00444e-26	0.62192	0.62192	0.508014	0.735827	2.04039e-21
UniRef90_A0A0E9F560	1262	0	0.921841	1.43514e-26	0.619666	0.619666	0.50582	0.733513	2.33223e-21
UniRef90_A0A0B4S2I6	1262	0	0.914668	5.54547e-26	0.612023	0.612023	0.498233	0.725812	6.43707e-21
UniRef90_J5D4J0	1262	0	0.666785	5.38689e-26	0.612476	0.612476	0.498631	0.72632	6.43707e-21
UniRef90_A8SL99	1262	0	0.938423	1.14121e-25	0.607816	0.607816	0.494074	0.721558	1.15911e-20
UniRef90_A0A133ZPE5	1262	0	0.862437	1.36286e-25	0.606891	0.606891	0.49314	0.720643	1.23042e-20
UniRef90_H1PMG2	1202	0	0.785026	5.52675e-25	0.614491	0.614491	0.497825	0.731157	4.49073e-20
UniRef90_A8SIY1	1262	0	0.96643	6.68448e-25	0.597515	0.597515	0.483871	0.711159	4.93767e-20
UniRef90_A0A133YZG7	1262	0	0.964584	7.80192e-25	0.596641	0.596641	0.483	0.710283	5.28284e-20
UniRef90_F5TDL7	1262	0	0.903436	9.3604e-25	0.595713	0.595713	0.482054	0.709371	5.85058e-20
UniRef90_A8SKE9	1262	0	0.942326	1.44915e-24	0.593092	0.593092	0.479466	0.706718	8.41071e-20
UniRef90_F5TD48	1262	0	0.831018	1.56523e-24	0.592822	0.592822	0.479165	0.706479	8.47882e-20
UniRef90_A0A379CDB2	1262	0	0.967997	1.78073e-24	0.591762	0.591762	0.478169	0.705355	8.55998e-20
UniRef90_D3LUR1	1262	0	0.896399	1.79091e-24	0.591877	0.591877	0.478256	0.705498	8.55998e-20
UniRef90_A0A0E9FBW8	1262	0	0.960878	3.67593e-24	0.587549	0.587549	0.47398	0.701118	1.65936e-19
UniRef90_A0A0E9E9H1	1262	0	0.844632	4.32605e-24	0.586794	0.586794	0.473192	0.700395	1.85006e-19
UniRef90_A0A0D1A480	1262	2.27095	0.725461	5.55118e-24	0.598448	0.598448	0.48231	0.714586	2.25529e-19
UniRef90_A0A0B4S0R1	1262	0	0.767815	6.85182e-24	0.584182	0.584182	0.47058	0.697784	2.54265e-19
UniRef90_A8SLE1	1262	0	0.932326	6.88434e-24	0.583886	0.583886	0.470337	0.697436	2.54265e-19
UniRef90_A0A3B7DIA2	1262	0	0.923536	7.61927e-24	0.583288	0.583288	0.469743	0.696834	2.57958e-19
UniRef90_A8SL59	1262	0	0.951378	7.3836e-24	0.58342	0.58342	0.469883	0.696956	2.57958e-19
UniRef90_A0A0E9F3N2	1262	0.011619	0.419619	8.00944e-24	0.583788	0.583788	0.470089	0.697486	2.60321e-19
UniRef90_A8SKH2	1262	0	0.949449	8.42847e-24	0.582641	0.582641	0.46911	0.696173	2.63404e-19
UniRef90_A0A0B4RZL9	1262	0	0.872914	1.02886e-23	0.58162	0.58162	0.468065	0.695174	3.09627e-19
UniRef90_F5TBM7	1262	0	0.860635	1.15851e-23	0.580922	0.580922	0.467371	0.694473	3.24688e-19
UniRef90_F5TDK4	1262	0	0.991018	1.15882e-23	0.580601	0.580601	0.467113	0.69409	3.24688e-19
UniRef90_A8SLD5	1262	0	0.934014	1.31254e-23	0.580039	0.580039	0.466521	0.693557	3.55499e-19
UniRef90_A8SLB1	1262	0	0.957516	1.40615e-23	0.579579	0.579579	0.466074	0.693084	3.68569e-19
UniRef90_A8SKG3	1262	0	0.941221	1.46122e-23	0.579392	0.579392	0.465881	0.692904	3.71033e-19
UniRef90_G5GKW7	1262	0	0.987245	1.60022e-23	0.578663	0.578663	0.465192	0.692133	3.94015e-19
UniRef90_Q7P6V2	1262	0	0.941693	1.76266e-23	0.578239	0.578239	0.464743	0.691735	4.21247e-19
UniRef90_A8SKZ9	1262	0	0.928722	1.93396e-23	0.577736	0.577736	0.464234	0.691238	4.48979e-19
UniRef90_A0A3B7DIK8	1262	0	0.91765	2.00791e-23	0.577529	0.577529	0.464025	0.691033	4.532e-19
UniRef90_A0A133YMJ7	1262	0	0.964758	2.38438e-23	0.576396	0.576396	0.46292	0.689872	5.23626e-19
UniRef90_A0A134AAQ7	1262	0	0.989516	2.53096e-23	0.575908	0.575908	0.462461	0.689356	5.41188e-19
UniRef90_A0A134AEF6	1262	0	0.9356	2.69759e-23	0.575712	0.575712	0.462231	0.689193	5.47978e-19
UniRef90_A8SIB2	1262	6.01397	0.661	2.6805e-23	0.609516	0.609516	0.489379	0.729652	5.47978e-19
UniRef90_A8SK02	1262	0	0.850466	3.1519e-23	0.574925	0.574925	0.461422	0.688428	6.2465e-19
UniRef90_A0A0E9ECU9	1262	0	0.95913	3.36685e-23	0.574324	0.574324	0.460864	0.687783	6.51361e-19
UniRef90_A0A0E9EJK7	1262	0	0.992224	3.80676e-23	0.57344	0.57344	0.460015	0.686865	7.1934e-19
UniRef90_F9PSD7	1262	0	0.993471	4.37689e-23	0.572582	0.572582	0.459167	0.685997	8.08278e-19
UniRef90_A0A0B4S0B8	1262	0	0.93768	4.50962e-23	0.572667	0.572667	0.459201	0.686133	8.14283e-19
UniRef90_A0A133YSU6	1262	0	0.97299	4.64996e-23	0.572331	0.572331	0.458896	0.685765	8.2137e-19
UniRef90_A8SJN6	1262	0	0.826759	4.97501e-23	0.57222	0.57222	0.45873	0.685711	8.60089e-19
UniRef90_A0A134ADH4	1262	0	0.998451	5.1858e-23	0.571491	0.571491	0.458097	0.684884	8.71783e-19
UniRef90_M2PK51	1262	0	0.849921	5.25723e-23	0.571857	0.571857	0.458375	0.685339	8.71783e-19
UniRef90_A0A0E9ENK1	1262	0	0.892783	5.69299e-23	0.571305	0.571305	0.457841	0.68477	8.99078e-19
UniRef90_A8SLQ6	1262	0	0.935763	5.67885e-23	0.571244	0.571244	0.457795	0.684693	8.99078e-19
UniRef90_F9PRM8	1262	0	0.87213	5.75378e-23	0.571258	0.571258	0.457791	0.684725	8.99078e-19
UniRef90_A0A134A9V3	1262	0	0.97332	6.07514e-23	0.57073	0.57073	0.457305	0.684154	9.31382e-19
UniRef90_C2BCL3	1262	0	0.977322	6.21655e-23	0.570523	0.570523	0.457113	0.683933	9.35413e-19
UniRef90_A8SNF5	1262	0	0.879826	7.02348e-23	0.570053	0.570053	0.456595	0.683511	1.03762e-18
UniRef90_G5GJ39	1262	0	0.767046	8.12898e-23	0.569278	0.569278	0.455805	0.682751	1.17949e-18
UniRef90_A0A0E9EDW8	1262	0	0.965425	8.31642e-23	0.568843	0.568843	0.45543	0.682256	1.18552e-18
UniRef90_A8SKG8	1262	0	0.990085	8.51362e-23	0.568614	0.568614	0.45522	0.682009	1.19271e-18
UniRef90_A0A381I5K6	1262	0	0.963037	8.98697e-23	0.56833	0.56833	0.454929	0.681731	1.22376e-18
UniRef90_A8SJJ3	1262	0	0.869936	9.0365e-23	0.568524	0.568524	0.455078	0.68197	1.22376e-18
UniRef90_A8SKG1	1262	0	0.951332	9.27453e-23	0.568237	0.568237	0.454818	0.681656	1.2354e-18
UniRef90_A0A133YVT7	1262	0	0.931448	9.73939e-23	0.567997	0.567997	0.454569	0.681425	1.2764e-18
UniRef90_A0A3B7DEE4	1262	0	0.918966	1.00186e-22	0.567837	0.567837	0.454408	0.681266	1.2786e-18
UniRef90_A8SKG6	1262	0	0.951418	1.00709e-22	0.567709	0.567709	0.4543	0.681119	1.2786e-18
UniRef90_A0A0E9F4U2	1262	0	0.84383	1.03725e-22	0.567753	0.567753	0.4543	0.681205	1.29664e-18
UniRef90_A0A0B4S0P1	1262	0	0.946523	1.06008e-22	0.567411	0.567411	0.454001	0.680821	1.30509e-18
UniRef90_A0A0B4S1G1	1262	0	0.808842	1.11261e-22	0.567371	0.567371	0.453913	0.680829	1.3323e-18
UniRef90_A5TX05	1262	0	0.942622	1.11497e-22	0.567109	0.567109	0.453701	0.680518	1.3323e-18
UniRef90_A8SJD5	1262	0	0.919535	1.14614e-22	0.567006	0.567006	0.453586	0.680426	1.3497e-18
UniRef90_A0A3B7DMF5	1262	0	0.980091	1.16323e-22	0.566743	0.566743	0.453359	0.680128	1.35025e-18
UniRef90_A8SLB0	1262	0	0.960329	1.37718e-22	0.565806	0.565806	0.452411	0.679201	1.57609e-18
UniRef90_F5TD07	1262	0	0.822718	1.61543e-22	0.565085	0.565085	0.451648	0.678523	1.82307e-18
UniRef90_A0A134AF82	1262	0	0.866385	1.75522e-22	0.564501	0.564501	0.451082	0.677919	1.92729e-18
UniRef90_A8SLA8	1262	0	0.910128	1.73683e-22	0.564488	0.564488	0.451085	0.677891	1.92729e-18
UniRef90_A8SJ66	1262	0	0.882704	1.84253e-22	0.564178	0.564178	0.450767	0.677589	1.99619e-18
UniRef90_A0A0E9FHT3	1262	0	0.917735	1.91147e-22	0.563874	0.563874	0.450481	0.677267	2.04362e-18
UniRef90_A8SKY3	1262	0	0.90805	1.95658e-22	0.563779	0.563779	0.450377	0.67718	2.06469e-18
UniRef90_A0A0E9EHV0	1262	0	0.909706	2.0879e-22	0.563351	0.563351	0.449959	0.676744	2.17502e-18
UniRef90_A8SNC8	1262	0	0.87915	2.16034e-22	0.563217	0.563217	0.449811	0.676622	2.21876e-18
UniRef90_M4YXW5	1262	0	0.958389	2.1845e-22	0.562987	0.562987	0.449615	0.67636	2.21876e-18
UniRef90_A0A0E9EQJ8	1262	0	0.900642	2.30614e-22	0.562769	0.562769	0.449376	0.676162	2.31339e-18
UniRef90_A8SK66	1262	0	0.88654	2.33485e-22	0.562713	0.562713	0.449316	0.676109	2.31362e-18
UniRef90_A0A134AFG5	1262	0	0.977308	2.38553e-22	0.562395	0.562395	0.449037	0.675753	2.33537e-18
UniRef90_A8SJX6	1262	0	0.856613	2.42865e-22	0.562555	0.562555	0.449144	0.675966	2.34927e-18
UniRef90_A0A0B4S2P0	1262	0	0.877891	2.66629e-22	0.561928	0.561928	0.448532	0.675323	2.5488e-18
UniRef90_F5TEB2	1262	0	0.975287	2.78921e-22	0.561446	0.561446	0.448094	0.674798	2.6353e-18
UniRef90_A0A0B4S0Z3	1262	0	0.964181	2.95959e-22	0.561106	0.561106	0.447752	0.67446	2.76414e-18
UniRef90_A8SKF3	1262	0	0.942393	3.23551e-22	0.560615	0.560615	0.447254	0.673976	2.9875e-18
UniRef90_A8SK58	1262	0	0.951356	3.40612e-22	0.560263	0.560263	0.446912	0.673614	3.10969e-18
UniRef90_A0A0E9EKD4	1262	0	0.942392	3.69999e-22	0.559807	0.559807	0.446449	0.673164	3.34045e-18
UniRef90_A0A134ACU2	1262	0	0.96237	3.83336e-22	0.559511	0.559511	0.44617	0.672851	3.42283e-18
UniRef90_A0A0E9ECA3	1262	0	0.969754	3.96103e-22	0.559327	0.559327	0.445985	0.67267	3.49839e-18
UniRef90_A0A0E9EL98	1262	0	0.991475	4.13537e-22	0.558919	0.558919	0.445607	0.67223	3.57465e-18
UniRef90_A8SLY8	1262	0	0.979447	4.1298e-22	0.558978	0.558978	0.445657	0.6723	3.57465e-18
UniRef90_A0A0B4S0I4	1262	0	0.971381	4.18095e-22	0.558975	0.558975	0.445639	0.672311	3.57601e-18
UniRef90_A0A0D1BE50	1262	7.98746	0.531551	4.26076e-22	0.602211	0.602211	0.480084	0.724338	3.60631e-18
UniRef90_A0A0E9EP84	1262	0	0.940592	4.68129e-22	0.558354	0.558354	0.445008	0.6717	3.88139e-18
UniRef90_F5TCY4	1262	0	0.963552	4.67902e-22	0.558285	0.558285	0.444954	0.671616	3.88139e-18
UniRef90_A0A0B4S0M6	1262	0	0.945804	4.8708e-22	0.55809	0.55809	0.44475	0.67143	3.97776e-18
UniRef90_G4D277	1262	0	0.938951	4.89543e-22	0.55811	0.55811	0.44476	0.671459	3.97776e-18
UniRef90_A8SIG5	1262	0	0.903281	5.35555e-22	0.55759	0.55759	0.444237	0.670943	4.30854e-18
UniRef90_A0A0E9EXS7	1262	0	0.901498	5.41592e-22	0.557538	0.557538	0.444182	0.670893	4.31439e-18
UniRef90_A0A0E9EUE9	1262	0	0.932683	5.65784e-22	0.557206	0.557206	0.443865	0.670547	4.37334e-18
UniRef90_A8SJ45	1262	0	0.93886	5.629e-22	0.557215	0.557215	0.443878	0.670551	4.37334e-18
UniRef90_A8SM48	1262	0	0.949581	5.5442e-22	0.557242	0.557242	0.443918	0.670566	4.37334e-18
UniRef90_J6CZ34	1262	0.0108074	0.453138	5.70522e-22	0.557794	0.557794	0.444323	0.671265	4.37334e-18
UniRef90_A0A134AAP6	1262	0	0.950615	6.50421e-22	0.5563	0.5563	0.442975	0.669625	4.93922e-18
UniRef90_A0A0B4S360	1216	0	0.985501	7.40077e-22	0.566185	0.566185	0.450686	0.681683	5.46678e-18
UniRef90_A0A0E9EJU4	1262	0	0.9776	7.39237e-22	0.555415	0.555415	0.442115	0.668715	5.46678e-18
UniRef90_A8SIY4	1262	0	0.967145	7.30569e-22	0.555546	0.555546	0.442234	0.668858	5.46678e-18
UniRef90_A0A0E9ENP7	1262	0	0.811297	7.60974e-22	0.555544	0.555544	0.442183	0.668906	5.5705e-18
UniRef90_A0A0E9ELD8	1262	0	0.911094	8.04373e-22	0.555056	0.555056	0.441727	0.668385	5.83562e-18
UniRef90_A0A0E9ECZ4	1262	0	0.950299	8.19472e-22	0.554855	0.554855	0.441544	0.668166	5.8834e-18
UniRef90_A0A0E9EXQ8	1262	0	0.866455	8.28893e-22	0.554955	0.554955	0.44161	0.6683	5.8834e-18
UniRef90_A0A0E9F980	1262	0	0.792506	8.32682e-22	0.555047	0.555047	0.441677	0.668417	5.8834e-18
UniRef90_A8SNC0	1262	0	0.858117	8.75092e-22	0.554604	0.554604	0.441265	0.667944	6.12976e-18
UniRef90_A0A0B4S0V8	1262	0	0.891796	9.18328e-22	0.554278	0.554278	0.440946	0.66761	6.37763e-18
UniRef90_E0E1P4	1262	0	0.793987	9.72803e-22	0.554032	0.554032	0.44068	0.667384	6.6987e-18
UniRef90_A0A0E9F1X4	1262	0	0.898342	9.91763e-22	0.553793	0.553793	0.440466	0.667119	6.77187e-18
UniRef90_A0A0B4S064	1262	0	0.864247	1.13142e-21	0.553019	0.553019	0.43969	0.666349	7.66107e-18
UniRef90_A8SM78	1262	0	0.976809	1.201e-21	0.552419	0.552419	0.43914	0.665699	8.06502e-18
UniRef90_U2XWF8	1262	0	0.956422	1.2155e-21	0.552373	0.552373	0.439088	0.665658	8.0955e-18
UniRef90_A0A0E9F0P7	1262	0	0.95135	1.27358e-21	0.552115	0.552115	0.438825	0.665404	8.35033e-18
UniRef90_A0A0E9F8W9	1262	0	0.8065	1.28459e-21	0.552343	0.552343	0.438996	0.665689	8.35033e-18
UniRef90_A8SL14	1262	0	0.97538	1.28409e-21	0.551978	0.551978	0.438707	0.665249	8.35033e-18
UniRef90_F5TDE7	1262	0	0.967664	1.33617e-21	0.55179	0.55179	0.438509	0.665072	8.61666e-18
UniRef90_A8SIE9	1262	0	0.965592	1.36428e-21	0.551679	0.551679	0.438394	0.664963	8.72863e-18
UniRef90_A0A134AAS8	1262	0	0.842513	1.44895e-21	0.551528	0.551528	0.438201	0.664855	8.98755e-18
UniRef90_A8SJV5	1216	0	0.9399	1.43572e-21	0.56215	0.56215	0.446651	0.677648	8.98755e-18
UniRef90_A8SLF3	1262	0	0.933839	1.44191e-21	0.551388	0.551388	0.438095	0.66468	8.98755e-18
UniRef90_A8SLQ3	1262	0	0.982622	1.44899e-21	0.551202	0.551202	0.437942	0.664463	8.98755e-18
UniRef90_A0A0E9E299	1262	0	0.95991	1.48684e-21	0.551156	0.551156	0.437873	0.664439	9.15246e-18
UniRef90_A8SL35	1262	0	0.958452	1.54005e-21	0.550905	0.550905	0.43763	0.664179	9.33851e-18
UniRef90_F9PQ43	1262	0	0.971206	1.5309e-21	0.550933	0.550933	0.43766	0.664206	9.33851e-18
UniRef90_A0A0B4S2J5	1262	0	0.884161	1.62125e-21	0.550738	0.550738	0.437435	0.664042	9.60282e-18
UniRef90_A0A0E9E7Y3	1262	0	0.961849	1.63921e-21	0.550532	0.550532	0.437257	0.663807	9.60282e-18
UniRef90_A8SIV6	1262	0	0.920279	1.60037e-21	0.550786	0.550786	0.437489	0.664083	9.60282e-18
UniRef90_A8SLR7	1262	0	0.942687	1.63665e-21	0.550587	0.550587	0.437303	0.663872	9.60282e-18
UniRef90_F5TDJ6	1262	0	0.933576	1.64273e-21	0.550565	0.550565	0.437281	0.66385	9.60282e-18
UniRef90_A0A133YVR2	1262	0	0.906163	1.75347e-21	0.550234	0.550234	0.436937	0.663531	1.0177e-17
UniRef90_A8SK41	1262	0	0.949236	1.78695e-21	0.550011	0.550011	0.436737	0.663285	1.02977e-17
UniRef90_A8SJX5	1262	0	0.868268	1.86588e-21	0.5499	0.5499	0.436595	0.663205	1.06768e-17
UniRef90_A0A0B4S162	1262	0	0.940196	1.93461e-21	0.54954	0.54954	0.436265	0.662816	1.09164e-17
UniRef90_G6C1L6	1262	0	0.884644	1.92819e-21	0.54963	0.54963	0.43634	0.66292	1.09164e-17
UniRef90_A0A0E9FAA4	1262	0	0.908793	2.10907e-21	0.549027	0.549027	0.43575	0.662304	1.18187e-17
UniRef90_A8SLW5	1262	0	0.979177	2.13379e-21	0.548829	0.548829	0.435578	0.662079	1.18753e-17
UniRef90_A0A0E9ENK3	1262	0	0.920809	2.30832e-21	0.548489	0.548489	0.435211	0.661767	1.26731e-17
UniRef90_A0A134AF05	1262	0	0.949535	2.29388e-21	0.548462	0.548462	0.435197	0.661727	1.26731e-17
UniRef90_F9PQ80	1262	0	0.88924	2.3367e-21	0.548466	0.548466	0.435177	0.661754	1.27428e-17
UniRef90_A0A0E9E168	1262	0	0.827734	2.40214e-21	0.548397	0.548397	0.435089	0.661706	1.29032e-17
UniRef90_A0A134A9V0	1262	0	0.888447	2.42941e-21	0.548223	0.548223	0.434936	0.661509	1.29032e-17
UniRef90_A8SNI1	1262	0	0.948216	2.42963e-21	0.548097	0.548097	0.434836	0.661357	1.29032e-17
UniRef90_F5TDA7	1262	0	0.953019	2.41125e-21	0.548144	0.548144	0.434883	0.661405	1.29032e-17
UniRef90_A0A0E9EEF5	1262	0	0.865895	2.5017e-21	0.548072	0.548072	0.43478	0.661364	1.31996e-17
UniRef90_A0A134AGC9	1262	0	0.910484	2.58307e-21	0.547776	0.547776	0.434505	0.661047	1.3541e-17
UniRef90_A0A0B4S2F7	1262	0	0.984052	2.60359e-21	0.547526	0.547526	0.434297	0.660755	1.35611e-17
UniRef90_A0A0E9FDB4	1262	0	0.881295	2.76314e-21	0.547392	0.547392	0.434116	0.660667	1.43005e-17
UniRef90_A8SJR2	1262	0	0.87384	2.82116e-21	0.547317	0.547317	0.434031	0.660603	1.45084e-17
UniRef90_A0A134ADE5	1262	0	0.922129	3.02162e-21	0.546809	0.546809	0.433542	0.660075	1.54415e-17
UniRef90_A8SND4	1262	0	0.948298	3.29801e-21	0.546212	0.546212	0.432959	0.659464	1.67486e-17
UniRef90_A0A134A9N7	1262	0	0.955972	3.32092e-21	0.546136	0.546136	0.43289	0.659381	1.67602e-17
UniRef90_A0A133YMH7	1262	0	0.943315	3.36912e-21	0.546078	0.546078	0.432827	0.65933	1.67949e-17
UniRef90_F5TBD7	1262	0	0.756244	3.36081e-21	0.546389	0.546389	0.433076	0.659702	1.67949e-17
UniRef90_A8SL01	1262	0	0.933743	3.42834e-21	0.545988	0.545988	0.432734	0.659243	1.69858e-17
UniRef90_F9PSI1	1262	0	0.875924	3.48575e-21	0.545974	0.545974	0.432701	0.659246	1.71656e-17
UniRef90_A0A0E9FBF8	1262	0	0.972938	3.50782e-21	0.545738	0.545738	0.432506	0.65897	1.71703e-17
UniRef90_A0A0E9FN56	1262	0	0.963774	3.6987e-21	0.54541	0.54541	0.43218	0.65864	1.79962e-17
UniRef90_A8SIL4	1262	0	0.892477	3.82394e-21	0.545331	0.545331	0.432075	0.658586	1.84948e-17
UniRef90_A0A0B4S2S0	1262	0	0.996161	3.87255e-21	0.544968	0.544968	0.431772	0.658164	1.85096e-17
UniRef90_A0A134A9T1	1262	0	0.98872	3.86905e-21	0.545041	0.545041	0.431831	0.658251	1.85096e-17
UniRef90_A0A0B4S1V1	1262	0	0.963636	3.91054e-21	0.545097	0.545097	0.431862	0.658332	1.85818e-17
UniRef90_A0A0E9E112	1262	0	0.940427	4.33207e-21	0.544489	0.544489	0.431252	0.657727	2.04651e-17
UniRef90_A8SN20	1262	0	0.961662	4.45328e-21	0.54427	0.54427	0.431043	0.657496	2.09161e-17
UniRef90_A0A0E9E9P8	1262	0	0.960756	4.51569e-21	0.54417	0.54417	0.430946	0.657393	2.09858e-17
UniRef90_F9PQ26	1262	0	0.920581	4.51978e-21	0.544276	0.544276	0.431029	0.657523	2.09858e-17
UniRef90_A0A0B4S082	1262	0	0.966366	4.58302e-21	0.544059	0.544059	0.43084	0.657278	2.11586e-17
UniRef90_A0A3B7DHX4	1262	0	0.980527	4.71204e-21	0.54385	0.54385	0.430639	0.657061	2.16313e-17
UniRef90_A0A134AIW1	1262	0	0.914849	4.93259e-21	0.543696	0.543696	0.43046	0.656933	2.25166e-17
UniRef90_A8SLV4	1262	0	0.952677	5.69889e-21	0.54277	0.54277	0.429544	0.655996	2.58693e-17
UniRef90_A8SM64	1262	0	0.959364	5.7365e-21	0.542698	0.542698	0.429478	0.655917	2.58954e-17
UniRef90_A0A0B4S1V8	1262	0	0.853011	6.06121e-21	0.542525	0.542525	0.429272	0.655779	2.71843e-17
UniRef90_A0A133YUZ1	1262	0	0.940115	6.08894e-21	0.542345	0.542345	0.429123	0.655566	2.71843e-17
UniRef90_A8SN78	1262	0	0.955265	6.30491e-21	0.542075	0.542075	0.428865	0.655284	2.79947e-17
UniRef90_A8SKC9	1262	0	0.862753	6.58253e-21	0.54201	0.54201	0.428759	0.655261	2.90685e-17
UniRef90_F5TDE3	1262	0	0.944273	6.81641e-21	0.541645	0.541645	0.428426	0.654864	2.99386e-17
UniRef90_A8SIC8	1262	0	0.942431	6.98809e-21	0.541464	0.541464	0.428251	0.654676	3.05276e-17
UniRef90_A0A134AIR1	1262	0	0.939576	7.09267e-21	0.541382	0.541382	0.428168	0.654597	3.06549e-17
UniRef90_A8SM21	1262	0	0.93634	7.07223e-21	0.541413	0.541413	0.428196	0.654631	3.06549e-17
UniRef90_A0A0B4S0W3	1262	0	0.796805	7.31321e-21	0.541446	0.541446	0.428179	0.654713	3.13435e-17
UniRef90_A0A0E9E739	1262	0	0.899929	7.32915e-21	0.541247	0.541247	0.428019	0.654475	3.13435e-17
UniRef90_A0A0B4S0E1	1262	0	0.962164	8.1177e-21	0.540479	0.540479	0.427281	0.653677	3.4534e-17
UniRef90_A0A0E9E2W0	1262	0	0.984796	8.25306e-21	0.540271	0.540271	0.427096	0.653447	3.4927e-17
UniRef90_A8SLQ2	1262	0	0.915973	8.8184e-21	0.540079	0.540079	0.426859	0.653299	3.69348e-17
UniRef90_A8SN59	1262	0	0.943083	8.81314e-21	0.540001	0.540001	0.426798	0.653205	3.69348e-17
UniRef90_A0A0B4S0S5	1262	0	0.92542	8.88292e-21	0.539978	0.539978	0.42677	0.653186	3.70142e-17
UniRef90_A8SMQ3	1262	0	0.951658	9.02812e-21	0.539825	0.539825	0.426628	0.653022	3.74273e-17
UniRef90_A0A0B4S0B4	1262	0	0.946147	9.27461e-21	0.539698	0.539698	0.426493	0.652902	3.80608e-17
UniRef90_A8SNK5	1262	0	0.98433	9.24475e-21	0.539576	0.539576	0.426401	0.652751	3.80608e-17
UniRef90_A0A3B7DEV4	1262	0	0.985048	9.46837e-21	0.539425	0.539425	0.42625	0.652599	3.84674e-17
UniRef90_A8SJZ1	1262	0	0.964284	9.42192e-21	0.539528	0.539528	0.426338	0.652717	3.84674e-17
UniRef90_A8SL79	1262	0	0.978561	1.02499e-20	0.538919	0.538919	0.42575	0.652089	4.14354e-17
UniRef90_A0A0E9EYX4	1262	0	0.960164	1.06593e-20	0.538767	0.538767	0.425579	0.651955	4.28769e-17
UniRef90_A0A133YMF4	1262	0	0.924163	1.09384e-20	0.538669	0.538669	0.425468	0.65187	4.37829e-17
UniRef90_A8SNH2	1262	0	0.964856	1.13463e-20	0.53835	0.53835	0.425169	0.651531	4.51932e-17
UniRef90_A8SND2	1262	0	0.982959	1.14662e-20	0.538221	0.538221	0.425054	0.651389	4.54477e-17
UniRef90_A0A0E9EQR0	1262	0	0.935013	1.16854e-20	0.538228	0.538228	0.425034	0.651421	4.60918e-17
UniRef90_A8SMG9	1262	0	0.897878	1.19896e-20	0.538142	0.538142	0.424933	0.65135	4.70633e-17
UniRef90_A0A133YN75	1262	0	0.858251	1.27884e-20	0.537803	0.537803	0.424583	0.651023	4.99573e-17
UniRef90_A0A0E9E2Z6	1262	0	0.875632	1.31406e-20	0.537596	0.537596	0.424384	0.650807	5.10877e-17
UniRef90_A0A134A9Y6	1262	0	0.929719	1.35846e-20	0.53729	0.53729	0.4241	0.65048	5.23134e-17
UniRef90_F9PQK6	1262	0	0.97086	1.35736e-20	0.537178	0.537178	0.424012	0.650343	5.23134e-17
UniRef90_A8SMQ2	1262	0	0.894293	1.40994e-20	0.537096	0.537096	0.423899	0.650293	5.40395e-17
UniRef90_A0A0B4S0W5	1262	0	0.966149	1.41777e-20	0.536919	0.536919	0.423751	0.650086	5.40846e-17
UniRef90_A0A0E9ELA7	1262	0	0.929274	1.4886e-20	0.536688	0.536688	0.423506	0.64987	5.65213e-17
UniRef90_A0A0E9EM12	1262	0	0.88331	1.52793e-20	0.536604	0.536604	0.423407	0.649802	5.77446e-17
UniRef90_A8SJ99	1262	0	0.921929	1.60485e-20	0.536262	0.536262	0.423072	0.649451	6.03709e-17
UniRef90_A8SJX7	1262	0	0.836726	1.6206e-20	0.536274	0.536274	0.42307	0.649479	6.06827e-17
UniRef90_A0A134AFI1	1262	0	0.912876	1.6571e-20	0.536038	0.536038	0.422854	0.649221	6.14825e-17
UniRef90_E0E5D3	1262	0	0.975487	1.65445e-20	0.535895	0.535895	0.422744	0.649046	6.14825e-17
UniRef90_A8SL71	1262	0	0.971876	1.6732e-20	0.535834	0.535834	0.422681	0.648987	6.17978e-17
UniRef90_A0A0E9F998	1262	0	0.896014	1.76027e-20	0.53568	0.53568	0.422493	0.648866	6.47193e-17
UniRef90_A0A134A9U9	1262	0	0.971789	1.83576e-20	0.535278	0.535278	0.422122	0.648434	6.7191e-17
UniRef90_A0A0E9FBD0	1262	0	0.979386	1.87011e-20	0.535136	0.535136	0.421986	0.648286	6.81413e-17
UniRef90_A0A0E9E653	1262	0	0.762045	1.90208e-20	0.535386	0.535386	0.422161	0.648612	6.89967e-17
UniRef90_A0A0E9EGZ0	1262	0	0.763217	1.96988e-20	0.535178	0.535178	0.421951	0.648405	7.11385e-17
UniRef90_A0A0E9EPV3	1262	0	0.965723	2.24217e-20	0.534	0.534	0.420853	0.647146	8.06136e-17
UniRef90_A8SJU2	1262	0	0.983875	2.27899e-20	0.533837	0.533837	0.420704	0.646971	8.15764e-17
UniRef90_V1D4M9	1262	0	0.895363	2.33016e-20	0.533879	0.533879	0.420708	0.64705	8.30422e-17
UniRef90_A0A0B4S003	1262	0	0.958513	2.34459e-20	0.533716	0.533716	0.420571	0.64686	8.31915e-17
UniRef90_A0A0B4S2Z7	1262	0	0.977067	2.38768e-20	0.533551	0.533551	0.420417	0.646684	8.4352e-17
UniRef90_A8SLV3	1262	0	0.972039	2.6684e-20	0.532847	0.532847	0.419717	0.645976	9.38613e-17
UniRef90_F3BB78	1262	0	0.603476	2.85604e-20	0.532861	0.532861	0.419639	0.646083	1.00028e-16
UniRef90_A0A0E9FGJ7	1262	0	0.746566	2.8822e-20	0.532737	0.532737	0.419529	0.645945	1.00511e-16
UniRef90_A8SIQ9	1262	0	0.982991	2.898e-20	0.532296	0.532296	0.419175	0.645418	1.00631e-16
UniRef90_A0A0B4RZU8	1262	0	0.93288	2.92674e-20	0.532377	0.532377	0.419226	0.645529	1.01196e-16
UniRef90_A0A0B4S155	1262	0	0.975249	3.09248e-20	0.531908	0.531908	0.418783	0.645032	1.06197e-16
UniRef90_A0A0B4S305	1262	0	0.941586	3.09751e-20	0.531994	0.531994	0.418849	0.645139	1.06197e-16
UniRef90_A0A0B4S2Q0	1262	0	0.979611	3.18608e-20	0.531684	0.531684	0.418568	0.6448	1.08774e-16
UniRef90_F5TBP9	1262	0	0.858448	3.3362e-20	0.531679	0.531679	0.418503	0.644855	1.13423e-16
UniRef90_A8SKW5	1262	0	0.976584	3.52895e-20	0.531058	0.531058	0.41794	0.644175	1.19476e-16
UniRef90_A0A0B4RZJ5	1262	0	0.890669	3.80152e-20	0.530773	0.530773	0.417618	0.643928	1.27641e-16
UniRef90_F5TDP5	1262	0	0.955863	3.78634e-20	0.530674	0.530674	0.417545	0.643803	1.27641e-16
UniRef90_E5V2W6	1262	0	0.925798	4.38609e-20	0.529832	0.529832	0.416688	0.642976	1.46662e-16
UniRef90_A0A0E9F9S7	1262	0	0.942447	4.59903e-20	0.529463	0.529463	0.416335	0.642591	1.53152e-16
UniRef90_E0E3D5	1262	0	0.91593	4.70248e-20	0.52936	0.52936	0.416225	0.642496	1.55958e-16
UniRef90_A0A0E9EKS4	1262	0	0.942351	4.74596e-20	0.529259	0.529259	0.416133	0.642386	1.5676e-16
UniRef90_A0A134AJT6	1262	0	0.957119	4.78064e-20	0.529175	0.529175	0.416057	0.642293	1.57267e-16
UniRef90_A0A0B4S147	1262	0	0.963414	4.82005e-20	0.529073	0.529073	0.415965	0.64218	1.57924e-16
UniRef90_A8SJ41	1262	0	0.937705	4.86274e-20	0.529109	0.529109	0.415983	0.642236	1.58683e-16
UniRef90_A0A134ACT9	1262	0	0.907752	4.9803e-20	0.528977	0.528977	0.415846	0.642107	1.61869e-16
UniRef90_A8SIL0	1262	0	0.953791	5.05831e-20	0.528795	0.528795	0.415683	0.641906	1.63099e-16
UniRef90_F5TDG4	1262	0	0.835666	5.05651e-20	0.529	0.529	0.415844	0.642155	1.63099e-16
UniRef90_A0A0D8J329	1262	0.00996541	0.368068	5.08349e-20	0.529573	0.529573	0.416288	0.642858	1.63263e-16
UniRef90_A8SIB4	1262	36.0131	0.141334	5.12516e-20	0.723101	0.723101	0.568402	0.8778	1.63954e-16
UniRef90_A8SLY9	1216	0	0.888117	5.16551e-20	0.539072	0.539072	0.423733	0.654411	1.64596e-16
UniRef90_A0A0B4S0J1	1262	0	0.858156	5.19223e-20	0.528825	0.528825	0.415672	0.641978	1.64802e-16
UniRef90_A0A0B4S3F5	1262	0	0.950069	5.42939e-20	0.528361	0.528361	0.415248	0.641475	1.71658e-16
UniRef90_A8SL76	1262	0	0.980233	5.48983e-20	0.528168	0.528168	0.415081	0.641254	1.72897e-16
UniRef90_A8SL80	1262	0	0.929829	5.72614e-20	0.528086	0.528086	0.41496	0.641211	1.79643e-16
UniRef90_A0A0B4S1M0	1216	0	0.945326	5.77033e-20	0.538233	0.538233	0.422923	0.653542	1.80333e-16
UniRef90_A8SIY0	1262	0	0.989646	5.82235e-20	0.52776	0.52776	0.414682	0.640838	1.81261e-16
UniRef90_A8SIG6	1262	0	0.949244	6.09863e-20	0.527606	0.527606	0.414499	0.640713	1.89138e-16
UniRef90_A0A3B7DHB4	1262	0	0.955623	6.4311e-20	0.527249	0.527249	0.414148	0.640351	1.9869e-16
UniRef90_A0A3B7DFI5	1262	0	0.941613	6.71298e-20	0.527007	0.527007	0.4139	0.640114	2.06613e-16
UniRef90_A0A0E9EW73	1262	0	0.95031	7.06714e-20	0.526637	0.526637	0.41354	0.639733	2.16693e-16
UniRef90_A0A0B4S378	1262	0	0.965104	7.32557e-20	0.526356	0.526356	0.413272	0.639441	2.23684e-16
UniRef90_G5GJ43	1262	0	0.87303	7.35019e-20	0.526547	0.526547	0.413417	0.639678	2.23684e-16
UniRef90_A0A0E9F0J2	1262	0	0.914077	7.45289e-20	0.526389	0.526389	0.413274	0.639503	2.25963e-16
UniRef90_A8SMF5	1262	0	0.972492	7.5405e-20	0.526172	0.526172	0.413088	0.639256	2.27769e-16
UniRef90_A0A0E9EZJ2	1262	0	0.86681	7.77025e-20	0.526182	0.526182	0.413056	0.639308	2.3212e-16
UniRef90_C0MCJ7	1262	0.0177622	0.154826	7.75602e-20	0.527225	0.527225	0.413877	0.640573	2.3212e-16
UniRef90_F7L235	1262	0	0.874619	7.72854e-20	0.526222	0.526222	0.413094	0.639349	2.3212e-16
UniRef90_A8SJY9	1262	0	0.995491	7.9857e-20	0.525649	0.525649	0.412601	0.638698	2.37683e-16
UniRef90_F5TB53	1262	0	0.948751	8.10035e-20	0.52578	0.52578	0.412685	0.638876	2.40215e-16
UniRef90_A0A0E9ER50	1262	0	0.876114	8.25907e-20	0.525788	0.525788	0.412664	0.638912	2.44032e-16
UniRef90_A0A133YST2	1262	0	0.922393	8.82064e-20	0.525266	0.525266	0.412166	0.638366	2.5968e-16
UniRef90_A0A134AFM0	1262	0	0.97862	9.02448e-20	0.524999	0.524999	0.411926	0.638072	2.64722e-16
UniRef90_A0A0B4S071	1262	0	0.959502	9.5086e-20	0.524697	0.524697	0.411618	0.637776	2.7792e-16
UniRef90_A0A0B4S187	1262	0	0.966087	1.01353e-19	0.524278	0.524278	0.411203	0.637353	2.95175e-16
UniRef90_A8SJV0	1262	0	0.985006	1.02224e-19	0.524139	0.524139	0.411083	0.637196	2.96519e-16
UniRef90_F9PS63	1216	0	0.807556	1.02544e-19	0.534611	0.534611	0.419291	0.64993	2.96519e-16
UniRef90_A0A0E9EDC4	1262	0	0.90808	1.04453e-19	0.524199	0.524199	0.411101	0.637298	3.00968e-16
UniRef90_F5TCT9	1262	0	0.951232	1.11993e-19	0.523675	0.523675	0.410595	0.636755	3.21554e-16
UniRef90_A0A0B4S0I1	1262	0	0.772788	1.20291e-19	0.523481	0.523481	0.410346	0.636616	3.4416e-16
UniRef90_A8SMU5	1262	0	0.944287	1.24015e-19	0.523021	0.523021	0.409944	0.636098	3.5357e-16
UniRef90_A0A0E9EF91	1262	0	0.940509	1.26204e-19	0.522931	0.522931	0.409849	0.636012	3.58553e-16
UniRef90_A0A134AIK1	1262	0	0.951879	1.28005e-19	0.522817	0.522817	0.409741	0.635893	3.62403e-16
UniRef90_F9PP76	1262	0	0.960672	1.32812e-19	0.522511	0.522511	0.409451	0.635572	3.74707e-16
UniRef90_A0A0B4S0J4	1262	0	0.857987	1.34709e-19	0.522637	0.522637	0.409531	0.635744	3.78745e-16
UniRef90_A0A134A5L5	1262	0	0.834346	1.35587e-19	0.522673	0.522673	0.409549	0.635796	3.79899e-16
UniRef90_A0A0B4S2J2	1262	0	0.976769	1.36107e-19	0.522326	0.522326	0.409273	0.63538	3.80046e-16
UniRef90_A0A0E9F3L7	1262	0	0.823241	1.36787e-19	0.522552	0.522552	0.409443	0.635661	3.80637e-16
UniRef90_A8SJ01	1262	0	0.928636	1.39898e-19	0.522266	0.522266	0.409188	0.635344	3.87963e-16
UniRef90_A0A0B4S2D1	1262	0	0.953761	1.40826e-19	0.522186	0.522186	0.409116	0.635255	3.89209e-16
UniRef90_Q8RIG2	1262	0	0.989607	1.42606e-19	0.521937	0.521937	0.408904	0.63497	3.92792e-16
UniRef90_A0A0B4RZR3	1262	0	0.984603	1.52932e-19	0.521534	0.521534	0.408493	0.634575	4.19812e-16
UniRef90_A0A0E9EKX8	1262	0	0.931476	1.56204e-19	0.521547	0.521547	0.408474	0.63462	4.27349e-16
UniRef90_Q8RIG8	1262	0	0.888371	1.5684e-19	0.521541	0.521541	0.408464	0.634618	4.2765e-16
UniRef90_A5TSU5	1262	4.39028	0.541371	1.63128e-19	0.543578	0.543578	0.425667	0.661489	4.43307e-16
UniRef90_F5TA67	1262	0	0.916562	1.71131e-19	0.520983	0.520983	0.407908	0.634059	4.63505e-16
UniRef90_A8SK19	1262	0	0.917059	1.78617e-19	0.520659	0.520659	0.407595	0.633722	4.82173e-16
UniRef90_A0A0B4S3A0	1262	0	0.970119	1.89659e-19	0.520171	0.520171	0.407131	0.633211	5.10287e-16
UniRef90_E5XFY3	1262	0	0.980994	1.91194e-19	0.520061	0.520061	0.407034	0.633088	5.12719e-16
UniRef90_A8SMN0	1262	0	0.951634	2.02152e-19	0.519818	0.519818	0.406767	0.632868	5.4032e-16
UniRef90_A0A134AFK0	1262	0	0.910587	2.03104e-19	0.519874	0.519874	0.406804	0.632943	5.41087e-16
UniRef90_A0A381I4R7	1262	0	0.812948	2.16079e-19	0.519563	0.519563	0.406476	0.63265	5.73771e-16
UniRef90_U2LCE4	1262	0	0.988706	2.21203e-19	0.519091	0.519091	0.406074	0.632108	5.85463e-16
UniRef90_B6FK42	1202	0	0.960584	2.27523e-19	0.532367	0.532367	0.41642	0.648314	6.00235e-16
UniRef90_E5XDM7	1262	0	0.98413	2.36155e-19	0.518665	0.518665	0.405651	0.631679	6.20992e-16
UniRef90_A0A0B4S1G4	1262	0	0.942742	2.37354e-19	0.51881	0.51881	0.405757	0.631862	6.22132e-16
UniRef90_A0A0B4S1E0	1262	0	0.945279	2.39918e-19	0.5187	0.5187	0.405657	0.631743	6.26829e-16
UniRef90_A0A0B4S2U3	1262	0	0.851917	2.57804e-19	0.518406	0.518406	0.405327	0.631485	6.71402e-16
UniRef90_A0A134AJ01	1262	0	0.962706	2.76002e-19	0.517745	0.517745	0.404716	0.630774	7.165e-16
UniRef90_A0A134ACJ1	1262	0	0.962576	2.79311e-19	0.517675	0.517675	0.404645	0.630705	7.22779e-16
UniRef90_A0A0B4RZS7	1262	0	0.95799	2.83481e-19	0.517583	0.517583	0.404553	0.630614	7.31243e-16
UniRef90_A8SIR5	1262	0	0.971876	2.89644e-19	0.517395	0.517395	0.404376	0.630415	7.44773e-16
UniRef90_A0A0B4S0X3	1262	0	0.881671	2.94259e-19	0.517475	0.517475	0.404416	0.630534	7.51881e-16
UniRef90_A0A0B4S2P9	1262	0	0.963474	2.94021e-19	0.51736	0.51736	0.404327	0.630392	7.51881e-16
UniRef90_A8SJZ6	1262	0	0.965471	3.30585e-19	0.516555	0.516555	0.403536	0.629575	8.39422e-16
UniRef90_A8SM01	1262	0	0.932747	3.29788e-19	0.516628	0.516628	0.403596	0.62966	8.39422e-16
UniRef90_E5XFG0	1262	0	0.571683	3.32686e-19	0.516971	0.516971	0.403852	0.630091	8.42125e-16
UniRef90_A8SNF3	1262	0	0.96355	3.68489e-19	0.515849	0.515849	0.402833	0.628865	9.29857e-16
UniRef90_A8SKH9	1262	0	0.920577	3.71675e-19	0.51589	0.51589	0.402853	0.628928	9.34993e-16
UniRef90_G4D283	1262	0	0.834839	3.79016e-19	0.515839	0.515839	0.402786	0.628892	9.50516e-16
UniRef90_C4GAV7	1262	2.07916	0.714538	3.9866e-19	0.526075	0.526075	0.410706	0.641443	9.9504e-16
UniRef90_G5GKW0	1202	0	0.667653	3.99218e-19	0.52898	0.52898	0.412972	0.644987	9.9504e-16
UniRef90_A0A134AE56	1262	0	0.99247	4.12318e-19	0.514953	0.514953	0.401976	0.62793	1.02455e-15
UniRef90_A8SJ57	1262	0	0.945335	4.37453e-19	0.514769	0.514769	0.40175	0.627788	1.08369e-15
UniRef90_A0A173YKK7	1262	0	0.704764	4.43281e-19	0.514971	0.514971	0.401889	0.628053	1.09479e-15
UniRef90_A8SK12	1262	0	0.947917	4.83512e-19	0.514049	0.514049	0.401048	0.627051	1.19053e-15
UniRef90_A0A0B4S142	1262	0	0.791204	4.90885e-19	0.514221	0.514221	0.401161	0.627282	1.20503e-15
UniRef90_A0A0E9ET39	1216	0	0.990883	4.96873e-19	0.523734	0.523734	0.408564	0.638903	1.21606e-15
UniRef90_A0A139Q3D0	1262	0	0.775917	4.99111e-19	0.514142	0.514142	0.401076	0.627209	1.21787e-15
UniRef90_A0A0B4S318	1262	0	0.882821	5.1647e-19	0.513767	0.513767	0.400735	0.626799	1.25645e-15
UniRef90_A0A134AIX4	1262	0	0.964539	5.33432e-19	0.513394	0.513394	0.400398	0.626389	1.29384e-15
UniRef90_E0E2S4	1262	0	0.975935	5.42443e-19	0.513239	0.513239	0.400254	0.626224	1.31178e-15
UniRef90_A0A0B4S234	1262	0	0.8931	5.47838e-19	0.513374	0.513374	0.400345	0.626402	1.3209e-15
UniRef90_A8SLQ0	1262	0	0.928512	5.604e-19	0.513166	0.513166	0.400151	0.62618	1.34719e-15
UniRef90_A8SJZ5	1262	0	0.949898	5.62644e-19	0.513084	0.513084	0.400082	0.626087	1.34859e-15
UniRef90_A8SIB0	1262	34.854	0.148816	5.90855e-19	0.693602	0.693602	0.540749	0.846454	1.4094e-15
UniRef90_F9PRJ4	1262	0	0.969721	5.91484e-19	0.512707	0.512707	0.399717	0.625697	1.4094e-15
UniRef90_A0A0B4S097	1262	0	0.988936	5.99081e-19	0.512561	0.512561	0.399586	0.625537	1.42333e-15
UniRef90_E5XFY4	1262	0	0.817284	6.05332e-19	0.512797	0.512797	0.399755	0.62584	1.43144e-15
UniRef90_F5TCM5	1262	0	0.932949	6.06015e-19	0.512654	0.512654	0.399642	0.625666	1.43144e-15
UniRef90_A5KQ33	1262	0	0.808714	6.33116e-19	0.512491	0.512491	0.399453	0.625529	1.49112e-15
UniRef90_A8SLD6	1262	0	0.959333	6.63689e-19	0.511955	0.511955	0.398968	0.624941	1.5586e-15
UniRef90_A0A173ZGS9	1262	0	0.867017	6.78227e-19	0.511925	0.511925	0.398914	0.624935	1.58816e-15
UniRef90_F9PRZ7	1262	0	0.974584	7.26634e-19	0.511314	0.511314	0.39834	0.624287	1.69662e-15
UniRef90_A5KQY5	1262	0	0.735397	8.08553e-19	0.510958	0.510958	0.397912	0.624004	1.88248e-15
UniRef90_E0E0Z0	1262	0	0.991057	8.30957e-19	0.510365	0.510365	0.397411	0.623319	1.92911e-15
UniRef90_X8JAR3	1262	0	0.56498	8.90584e-19	0.510501	0.510501	0.397418	0.623583	2.06165e-15
UniRef90_A8SJU5	1216	0	0.97673	9.02008e-19	0.519744	0.519744	0.404595	0.634893	2.08216e-15
UniRef90_A0A0E9EUN2	1216	0	0.820121	9.14066e-19	0.519899	0.519899	0.404696	0.635101	2.10402e-15
UniRef90_A8SJU9	1262	0	0.982784	9.81787e-19	0.509316	0.509316	0.396356	0.622275	2.25352e-15
UniRef90_A5KL09	1262	0	0.681133	1.14786e-18	0.50867	0.50867	0.39563	0.62171	2.61991e-15
UniRef90_M2PYX2	1202	0	0.819554	1.14657e-18	0.521589	0.521589	0.40568	0.637498	2.61991e-15
UniRef90_E5XDE9	1262	0	0.575625	1.18073e-18	0.508596	0.508596	0.395532	0.621659	2.67988e-15
UniRef90_Q8RI55	1262	0	0.999398	1.17788e-18	0.507903	0.507903	0.394997	0.62081	2.67988e-15
UniRef90_A0A3B7DIF2	1262	0	0.953929	1.29466e-18	0.507554	0.507554	0.39459	0.620519	2.93027e-15
UniRef90_A8SKC8	1262	0	0.991217	1.404e-18	0.506873	0.506873	0.393943	0.619802	3.16892e-15
UniRef90_A8SLQ7	1262	0	0.976163	1.44431e-18	0.506744	0.506744	0.393802	0.619686	3.25087e-15
UniRef90_E5XFH7	1262	0	0.838549	1.45323e-18	0.506901	0.506901	0.393916	0.619887	3.26192e-15
UniRef90_A0A379CFZ2	1262	0	0.790123	1.4579e-18	0.506992	0.506992	0.393981	0.620002	3.26339e-15
UniRef90_A0A0B4RZK4	1262	0	0.966764	1.54923e-18	0.506307	0.506307	0.393361	0.619252	3.45829e-15
UniRef90_A0A0E9EDW1	1262	0	0.94147	1.60018e-18	0.50615	0.50615	0.393193	0.619107	3.56223e-15
UniRef90_A0A173YHL4	1262	0	0.805307	1.6723e-18	0.506003	0.506003	0.393015	0.618991	3.7025e-15
UniRef90_D2MPE2	1262	0	0.839848	1.67004e-18	0.506003	0.506003	0.393017	0.618989	3.7025e-15
UniRef90_A8SK15	1262	0	0.967474	1.70142e-18	0.505668	0.505668	0.392729	0.618606	3.75674e-15
UniRef90_A8SJR6	1262	0	0.976048	1.74368e-18	0.505474	0.505474	0.392543	0.618405	3.83963e-15
UniRef90_A0A0E9EBE6	1262	0	0.992076	1.83434e-18	0.505054	0.505054	0.392144	0.617964	4.02833e-15
UniRef90_A8SLB2	1262	0	0.955727	2.05161e-18	0.504451	0.504451	0.391513	0.617389	4.49334e-15
UniRef90_A8SKR9	1262	0	0.981248	2.08159e-18	0.504282	0.504282	0.391361	0.617204	4.54674e-15
UniRef90_A0A174EJP3	1262	0	0.79302	2.09925e-18	0.504502	0.504502	0.39152	0.617485	4.57301e-15
UniRef90_A8SMZ5	1262	0	0.933634	2.1964e-18	0.504049	0.504049	0.391101	0.616996	4.77186e-15
UniRef90_A8SNB4	1262	0	0.979561	2.25851e-18	0.503761	0.503761	0.390838	0.616684	4.89371e-15
UniRef90_A0A0E9EQ71	1262	0	0.941926	2.2994e-18	0.503725	0.503725	0.390783	0.616666	4.96905e-15
UniRef90_A0A174D6Z9	1262	0	0.689048	2.33153e-18	0.503923	0.503923	0.390917	0.616929	5.02513e-15
UniRef90_E5XDY4	1262	0	0.880041	2.62269e-18	0.5029	0.5029	0.389952	0.615849	5.63771e-15
UniRef90_A8SK48	1262	0	0.976362	2.76364e-18	0.502405	0.502405	0.389491	0.615319	5.92502e-15
UniRef90_E5XFY8	1262	0	0.722215	2.83556e-18	0.502539	0.502539	0.389557	0.61552	6.0473e-15
UniRef90_E5XJC6	1262	0	0.75964	2.83491e-18	0.502533	0.502533	0.389553	0.615514	6.0473e-15
UniRef90_F5TD64	1262	0	0.994467	2.95218e-18	0.501857	0.501857	0.388969	0.614744	6.27953e-15
UniRef90_A0A173YUI7	1262	0	0.825466	3.10182e-18	0.501842	0.501842	0.388885	0.614799	6.5806e-15
UniRef90_E5XG02	1262	0	0.591531	3.22498e-18	0.501841	0.501841	0.388827	0.614855	6.82406e-15
UniRef90_Q8RIH3	1202	0	0.928057	3.24695e-18	0.514263	0.514263	0.398441	0.630084	6.85272e-15
UniRef90_A8SLR3	1262	0	0.991348	3.32905e-18	0.501068	0.501068	0.388181	0.613954	7.00778e-15
UniRef90_A0A0D8J3M5	1262	0.00459423	0.368898	3.56972e-18	0.501501	0.501501	0.388414	0.614588	7.49497e-15
UniRef90_A5KLI3	1262	0.00606682	0.504969	3.69319e-18	0.501047	0.501047	0.388012	0.614082	7.72546e-15
UniRef90_A8SL09	1262	0	0.982359	3.69851e-18	0.500388	0.500388	0.387499	0.613276	7.72546e-15
UniRef90_E5XFH4	1262	0	0.522581	3.77162e-18	0.500849	0.500849	0.387828	0.613871	7.85798e-15
UniRef90_E5XD76	1262	0	0.946515	3.90636e-18	0.500107	0.500107	0.387201	0.613013	8.11788e-15
UniRef90_E5XIG6	1262	0	0.770099	3.94197e-18	0.5003	0.5003	0.387337	0.613263	8.17099e-15
UniRef90_A0A174D6K7	1262	0	0.754186	3.97899e-18	0.50024	0.50024	0.387277	0.613203	8.22674e-15
UniRef90_A0A0B4S0H2	1262	0	0.910425	4.04663e-18	0.499954	0.499954	0.38703	0.612878	8.31276e-15
UniRef90_A0A133Z000	1262	0	0.983875	4.03508e-18	0.499815	0.499815	0.386927	0.612703	8.31276e-15
UniRef90_E5XJF3	1262	0	0.67004	4.05129e-18	0.500208	0.500208	0.387225	0.61319	8.31276e-15
UniRef90_E5XKH1	1262	0	0.713496	4.10292e-18	0.500071	0.500071	0.3871	0.613041	8.39751e-15
UniRef90_A8SJT1	1262	0	0.979064	4.19055e-18	0.499568	0.499568	0.38668	0.612456	8.55531e-15
UniRef90_A0A0B4RZA7	1262	0	0.997257	4.21295e-18	0.499418	0.499418	0.386556	0.61228	8.57947e-15
UniRef90_A5KMX4	1262	0	0.847641	4.2933e-18	0.499616	0.499616	0.386681	0.612552	8.72126e-15
UniRef90_A0A0B4S3L7	1262	0	0.957972	4.39478e-18	0.499316	0.499316	0.386414	0.612218	8.90512e-15
UniRef90_A0A174BIQ0	1262	0	0.833488	4.52182e-18	0.499276	0.499276	0.386341	0.612211	9.11708e-15
UniRef90_E5XIW6	1262	0	0.62153	4.5145e-18	0.499526	0.499526	0.386537	0.612515	9.11708e-15
UniRef90_E5XDQ8	1262	0	0.720303	4.595e-18	0.499284	0.499284	0.386324	0.612245	9.2417e-15
UniRef90_E5XG63	1262	0	0.706902	4.61085e-18	0.499282	0.499282	0.386317	0.612248	9.25067e-15
UniRef90_A0A174LKC5	1262	0	0.895409	4.63425e-18	0.499043	0.499043	0.386124	0.611962	9.27471e-15
UniRef90_E5XGY8	1262	0	0.75413	4.72266e-18	0.499082	0.499082	0.386126	0.612038	9.42844e-15
UniRef90_A0A133YKF0	1262	0	0.977034	4.78082e-18	0.498714	0.498714	0.385823	0.611605	9.52115e-15
UniRef90_E5XDX3	1262	0	0.799735	5.00715e-18	0.498635	0.498635	0.385694	0.611577	9.92326e-15
UniRef90_E5XFY9	1262	0.00457974	0.367595	5.00281e-18	0.499139	0.499139	0.386084	0.612193	9.92326e-15
UniRef90_R5QHK2	1262	0	0.753561	5.25465e-18	0.498375	0.498375	0.385421	0.61133	1.03884e-14
UniRef90_A0A174CKX8	1262	0	0.655129	5.45211e-18	0.498206	0.498206	0.385235	0.611177	1.07526e-14
UniRef90_A0A174FJX2	1262	0	0.718172	5.49983e-18	0.498073	0.498073	0.385119	0.611027	1.08205e-14
UniRef90_A0A174DVJ7	1262	0	0.884527	5.54597e-18	0.497831	0.497831	0.384919	0.610742	1.08849e-14
UniRef90_A0A174DD88	1262	0	0.656914	5.62335e-18	0.497994	0.497994	0.385025	0.610963	1.10102e-14
UniRef90_E5XE08	1262	0	0.804385	5.78111e-18	0.497665	0.497665	0.384729	0.610601	1.12919e-14
UniRef90_A0A173XUI6	1262	0	0.70379	5.85419e-18	0.497665	0.497665	0.38471	0.61062	1.14072e-14
UniRef90_E5XKA2	1262	0	0.798906	5.89746e-18	0.497516	0.497516	0.384584	0.610448	1.1464e-14
UniRef90_A0A0B4S1V6	1262	0	0.983392	5.99287e-18	0.497131	0.497131	0.384263	0.61	1.16217e-14
UniRef90_A5KJ62	1262	0.00385949	0.434708	6.09101e-18	0.497686	0.497686	0.384667	0.610705	1.17838e-14
UniRef90_E5XDS8	1262	0	0.654189	6.24584e-18	0.49728	0.49728	0.384316	0.610245	1.20547e-14
UniRef90_E5XFZ7	1262	0	0.654422	6.38839e-18	0.497131	0.497131	0.384167	0.610096	1.22715e-14
UniRef90_E5XG86	1262	0	0.582906	6.3807e-18	0.497216	0.497216	0.384234	0.610198	1.22715e-14
UniRef90_E5XFX1	1262	0	0.45381	6.45719e-18	0.497281	0.497281	0.384266	0.610295	1.23744e-14
UniRef90_A5KL47	1262	0	0.898055	6.55152e-18	0.496672	0.496672	0.383774	0.60957	1.25257e-14
UniRef90_A5KLW9	1262	0	0.552795	6.58522e-18	0.497029	0.497029	0.384043	0.610016	1.25605e-14
UniRef90_E5XFY6	1262	0	0.551359	6.78665e-18	0.496838	0.496838	0.383849	0.609826	1.29144e-14
UniRef90_A5KLY7	1262	0	0.827492	7.02132e-18	0.496299	0.496299	0.383382	0.609215	1.33298e-14
UniRef90_R5R2G1	1262	0	0.617573	7.24979e-18	0.496308	0.496308	0.383341	0.609275	1.37314e-14
UniRef90_A0A174A737	1262	0	0.864195	7.45317e-18	0.495857	0.495857	0.382951	0.608763	1.40838e-14
UniRef90_A0A174F5F4	1262	0	0.760611	7.75459e-18	0.495707	0.495707	0.382775	0.608638	1.46194e-14
UniRef90_A0A173XLR9	1262	0	0.721661	7.9858e-18	0.495528	0.495528	0.382593	0.608464	1.50204e-14
UniRef90_A5KQ35	1262	0	0.923547	8.14535e-18	0.495156	0.495156	0.382276	0.608036	1.52851e-14
UniRef90_A0A173Y6I3	1262	0	0.850833	8.30655e-18	0.495149	0.495149	0.382241	0.608056	1.55517e-14
UniRef90_R5QTR6	1262	0	0.624662	8.34701e-18	0.495352	0.495352	0.382391	0.608314	1.55916e-14
UniRef90_A0A174A4K7	1262	0	0.799438	8.39623e-18	0.49512	0.49512	0.382203	0.608038	1.56475e-14
UniRef90_A0A2C6BEZ6	1262	0	0.890716	8.50481e-18	0.494929	0.494929	0.382036	0.607822	1.58136e-14
UniRef90_A0A173Z9M2	1262	0.00140978	0.492087	8.63748e-18	0.495231	0.495231	0.382246	0.608217	1.59932e-14
UniRef90_E5XJL6	1262	0	0.613332	8.64079e-18	0.495128	0.495128	0.382165	0.608091	1.59932e-14
UniRef90_E0E277	1262	0	0.818497	8.7007e-18	0.494876	0.494876	0.38196	0.607791	1.60675e-14
UniRef90_A0A174AW42	1262	0	0.702739	8.72598e-18	0.494936	0.494936	0.382002	0.607869	1.60777e-14
UniRef90_A0A173XBE6	1262	0	0.806215	8.99302e-18	0.494648	0.494648	0.381735	0.607562	1.64953e-14
UniRef90_E5XE42	1262	0	0.650919	8.99327e-18	0.494815	0.494815	0.381863	0.607767	1.64953e-14
UniRef90_A5KN30	1262	0	0.87928	9.09493e-18	0.494495	0.494495	0.381599	0.60739	1.66442e-14
UniRef90_E5XFZ5	1262	0	0.817778	9.18114e-18	0.494498	0.494498	0.381587	0.607408	1.67642e-14
UniRef90_E5XEJ2	1262	0.0140893	0.381746	9.28912e-18	0.494931	0.494931	0.381904	0.607959	1.69234e-14
UniRef90_A5KKS5	1262	0	0.895316	9.43407e-18	0.494182	0.494182	0.381303	0.607062	1.7149e-14
UniRef90_A5KP11	1262	0	0.66602	9.66673e-18	0.494331	0.494331	0.381381	0.607282	1.75327e-14
UniRef90_E5XEQ4	1262	0	0.815888	9.73367e-18	0.494115	0.494115	0.381203	0.607026	1.76148e-14
UniRef90_A0A173YLU6	1262	0	0.60418	9.94759e-18	0.494153	0.494153	0.3812	0.607106	1.79619e-14
UniRef90_E5XEK3	1262	0	0.779608	1.03674e-17	0.49371	0.49371	0.380795	0.606624	1.86784e-14
UniRef90_A0A173YVN7	1262	0	0.584728	1.06858e-17	0.4937	0.4937	0.380742	0.606658	1.92094e-14
UniRef90_A8SND6	1262	0	0.973168	1.07564e-17	0.493208	0.493208	0.380352	0.606063	1.92938e-14
UniRef90_A0A173ZWX0	1262	0	0.7786	1.10133e-17	0.493277	0.493277	0.38037	0.606184	1.97111e-14
UniRef90_R5QCP0	1262	0	0.759889	1.10621e-17	0.493285	0.493285	0.380369	0.606201	1.97549e-14
UniRef90_E5XJ61	1262	0	0.969404	1.11544e-17	0.492933	0.492933	0.380085	0.605781	1.9876e-14
UniRef90_A0A174CF46	1262	0	0.733942	1.12103e-17	0.49321	0.49321	0.380291	0.606129	1.98771e-14
UniRef90_E5XIF1	1262	0	0.794699	1.11821e-17	0.493174	0.493174	0.380267	0.606081	1.98771e-14
UniRef90_E5XK65	1262	0	0.874055	1.12284e-17	0.493035	0.493035	0.380154	0.605916	1.98771e-14
UniRef90_E5XDZ3	1262	0	0.847773	1.16349e-17	0.492851	0.492851	0.379958	0.605744	2.05519e-14
UniRef90_E7MKK5	1262	0	0.806081	1.19226e-17	0.492695	0.492695	0.3798	0.60559	2.10143e-14
UniRef90_A0A173Y3W8	1262	0	0.761241	1.20533e-17	0.492658	0.492658	0.379755	0.60556	2.11988e-14
UniRef90_A8SLD4	1262	0	0.865221	1.22165e-17	0.492532	0.492532	0.379638	0.605427	2.14394e-14
UniRef90_A5KKB2	1262	0	0.77873	1.23588e-17	0.492542	0.492542	0.379628	0.605456	2.16423e-14
UniRef90_E5XIN6	1262	0	0.759779	1.29068e-17	0.492198	0.492198	0.379296	0.605099	2.25534e-14
UniRef90_A5KQS7	1262	0	0.814918	1.3113e-17	0.492064	0.492064	0.379169	0.60496	2.28645e-14
UniRef90_A0A174F6Y3	1262	0	0.707239	1.38807e-17	0.49177	0.49177	0.378856	0.604685	2.41514e-14
UniRef90_E5XK91	1262	0.000394837	0.502129	1.39339e-17	0.491946	0.491946	0.378986	0.604907	2.41921e-14
UniRef90_A0A174A117	1262	0	0.560211	1.40361e-17	0.491847	0.491847	0.378898	0.604797	2.43176e-14
UniRef90_F0YXH7	1262	0	0.896208	1.40978e-17	0.491428	0.491428	0.378568	0.604288	2.43726e-14
UniRef90_A0A173Z738	1262	0	0.775397	1.41559e-17	0.491548	0.491548	0.378654	0.604441	2.44211e-14
UniRef90_A0A3B7DKJ8	1262	0	0.979714	1.42234e-17	0.491241	0.491241	0.378411	0.604071	2.44855e-14
UniRef90_A0A174EAT8	1262	0	0.668683	1.42554e-17	0.491645	0.491645	0.378719	0.604572	2.44886e-14
UniRef90_A0A173YS22	1262	0	0.820583	1.4397e-17	0.491402	0.491402	0.378516	0.604288	2.46798e-14
UniRef90_A0A174C062	1262	0	0.776664	1.45685e-17	0.491359	0.491359	0.378465	0.604253	2.49212e-14
UniRef90_A5KME7	1262	0	0.881061	1.51645e-17	0.490971	0.490971	0.378105	0.603837	2.58861e-14
UniRef90_A5KJA5	1262	0	0.596524	1.53439e-17	0.491188	0.491188	0.378254	0.604122	2.61057e-14
UniRef90_A5KKF0	1262	0	0.864453	1.53573e-17	0.490915	0.490915	0.378043	0.603788	2.61057e-14
UniRef90_A5KM07	1262	0	0.934481	1.53966e-17	0.490791	0.490791	0.377943	0.603639	2.61177e-14
UniRef90_A5KJX7	1262	0	0.77939	1.57156e-17	0.490858	0.490858	0.377963	0.603753	2.65481e-14
UniRef90_E5XJD1	1262	0	0.651771	1.56971e-17	0.490985	0.490985	0.378063	0.603908	2.65481e-14
UniRef90_F3B9R5	1262	0.00606009	0.392562	1.58272e-17	0.491199	0.491199	0.378214	0.604183	2.66812e-14
UniRef90_A5KJL9	1262	0	0.687587	1.61388e-17	0.490754	0.490754	0.377842	0.603666	2.71501e-14
UniRef90_A5KQY9	1262	0	0.889063	1.62776e-17	0.490478	0.490478	0.377617	0.60334	2.73111e-14
UniRef90_E5XEC7	1262	0.0108774	0.464501	1.63017e-17	0.490973	0.490973	0.377995	0.603951	2.73111e-14
UniRef90_E5XFT3	1262	0	0.553889	1.64332e-17	0.490767	0.490767	0.377824	0.60371	2.74747e-14
UniRef90_E5XFZ9	1262	0.00116654	0.432207	1.66195e-17	0.490819	0.490819	0.377847	0.603791	2.77291e-14
UniRef90_A0A174EIY5	1262	0	0.815063	1.66723e-17	0.490415	0.490415	0.377531	0.603299	2.77602e-14
UniRef90_A0A173YKU5	1262	0	0.7586	1.68694e-17	0.490401	0.490401	0.377503	0.6033	2.80309e-14
UniRef90_A5KPG3	1262	0	0.817261	1.69059e-17	0.490303	0.490303	0.377423	0.603182	2.80343e-14
UniRef90_A0A173XR04	1262	0	0.626079	1.698e-17	0.490461	0.490461	0.377539	0.603384	2.80999e-14
UniRef90_A0A174DYK7	1262	0	0.707362	1.75785e-17	0.490144	0.490144	0.377241	0.603046	2.87971e-14
UniRef90_A0A174FBB8	1262	0	0.588326	1.75018e-17	0.490302	0.490302	0.377369	0.603234	2.87971e-14
UniRef90_A5KN27	1262	0	0.638569	1.7443e-17	0.490287	0.490287	0.377363	0.603211	2.87971e-14
UniRef90_A5KNX1	1262	0	0.824534	1.75562e-17	0.49003	0.49003	0.377156	0.602905	2.87971e-14
UniRef90_E5XJZ1	1262	0	0.95235	1.7547e-17	0.489862	0.489862	0.377027	0.602697	2.87971e-14
UniRef90_E5XD65	1262	0	0.689481	1.77759e-17	0.490069	0.490069	0.377166	0.602972	2.90187e-14
UniRef90_E5XEK7	1262	0	0.668594	1.77852e-17	0.490122	0.490122	0.377206	0.603037	2.90187e-14
UniRef90_E5XIQ5	1262	0	0.850726	1.80268e-17	0.489838	0.489838	0.376967	0.602709	2.93371e-14
UniRef90_E5XK13	1262	0	0.871061	1.80526e-17	0.489799	0.489799	0.376935	0.602663	2.93371e-14
UniRef90_A5KNX9	1262	0	0.902467	1.82388e-17	0.489684	0.489684	0.37683	0.602537	2.95806e-14
UniRef90_A8SKR6	1262	0	0.910297	1.86484e-17	0.489515	0.489515	0.376666	0.602363	3.01845e-14
UniRef90_A5KKG1	1262	0	0.811542	1.86944e-17	0.489625	0.489625	0.376747	0.602503	3.01989e-14
UniRef90_E5XDH4	1262	0	0.855692	1.88659e-17	0.489517	0.489517	0.37665	0.602385	3.04155e-14
UniRef90_E5XFP0	1262	0	0.673163	1.91911e-17	0.489587	0.489587	0.376677	0.602497	3.08785e-14
UniRef90_A5KQP0	1262	0	0.775881	1.9255e-17	0.489445	0.489445	0.376563	0.602327	3.09201e-14
UniRef90_A0A174EDS1	1262	0	0.726022	1.93377e-17	0.489476	0.489476	0.37658	0.602372	3.09917e-14
UniRef90_A0A174FB87	1262	0	0.765678	1.9651e-17	0.489308	0.489308	0.376426	0.602189	3.14317e-14
UniRef90_A0A174EH45	1262	0	0.6537	1.98022e-17	0.489388	0.489388	0.376476	0.602301	3.16114e-14
UniRef90_A0A174AY88	1262	0.000281835	0.317806	1.99246e-17	0.489703	0.489703	0.376709	0.602698	3.16982e-14
UniRef90_A8SLV1	1262	0	0.930878	1.99346e-17	0.489082	0.489082	0.37623	0.601934	3.16982e-14
UniRef90_A0A173YRN9	1262	0	0.785411	2.00277e-17	0.489146	0.489146	0.376272	0.602019	3.1759e-14
UniRef90_A0A173Z3R9	1262	0	0.900628	2.0051e-17	0.489006	0.489006	0.376163	0.601849	3.1759e-14
UniRef90_R5QW53	1262	0	0.534443	2.04251e-17	0.489325	0.489325	0.376379	0.60227	3.22886e-14
UniRef90_A0A173Z6M6	1262	0	0.739873	2.05621e-17	0.489021	0.489021	0.376136	0.601907	3.24419e-14
UniRef90_A0A173YLR9	1262	0	0.588573	2.06251e-17	0.489174	0.489174	0.376248	0.6021	3.24784e-14
UniRef90_A0A174A5T2	1262	0	0.846859	2.09215e-17	0.488801	0.488801	0.37594	0.601663	3.28814e-14
UniRef90_A0A173XYR0	1262	0	0.632495	2.09865e-17	0.489013	0.489013	0.376097	0.601928	3.29198e-14
UniRef90_E0E1S9	1262	0	0.730448	2.11205e-17	0.488917	0.488917	0.376014	0.601821	3.30662e-14
UniRef90_A8SLC5	1262	0	0.920193	2.12339e-17	0.488618	0.488618	0.375775	0.60146	3.31798e-14
UniRef90_A0A173XQB9	1262	0	0.753871	2.13928e-17	0.488744	0.488744	0.375861	0.601626	3.33639e-14
UniRef90_R5QAU9	1262	0.0112877	0.596393	2.20696e-17	0.48872	0.48872	0.375795	0.601646	3.43535e-14
UniRef90_A0A173XFY1	1262	0	0.660034	2.24928e-17	0.488486	0.488486	0.375585	0.601387	3.49454e-14
UniRef90_A0A173ZKC6	1262	0	0.5796	2.291e-17	0.488432	0.488432	0.375515	0.601349	3.55075e-14
UniRef90_E5XH04	1262	0	0.812328	2.2942e-17	0.488224	0.488224	0.375353	0.601095	3.55075e-14
UniRef90_A0A174CNK4	1262	0	0.529529	2.32284e-17	0.488402	0.488402	0.375471	0.601334	3.58823e-14
UniRef90_A0A174DW56	1262	0	0.879445	2.35303e-17	0.487937	0.487937	0.375093	0.600781	3.62798e-14
UniRef90_A0A0B4S053	1262	0	0.958378	2.36721e-17	0.487795	0.487795	0.374975	0.600616	3.6293e-14
UniRef90_A0A0E9EFT2	1262	0	0.97116	2.3787e-17	0.48772	0.48772	0.37491	0.60053	3.6293e-14
UniRef90_A5KKJ7	1262	0	0.678783	2.37582e-17	0.488088	0.488088	0.375194	0.600982	3.6293e-14
UniRef90_E5XDZ0	1262	0	0.786244	2.36193e-17	0.488033	0.488033	0.375161	0.600904	3.6293e-14
UniRef90_E5XJX1	1262	0	0.967054	2.38069e-17	0.487734	0.487734	0.374919	0.600549	3.6293e-14
UniRef90_F0Z145	1262	0	0.794662	2.37613e-17	0.487969	0.487969	0.375103	0.600835	3.6293e-14
UniRef90_A0A174BXH1	1262	0	0.778733	2.44283e-17	0.487812	0.487812	0.374939	0.600685	3.71706e-14
UniRef90_A0A174E8F1	1262	0	0.754395	2.46828e-17	0.487765	0.487765	0.374887	0.600643	3.74877e-14
UniRef90_E5XHC6	1262	0	0.624088	2.48064e-17	0.487858	0.487858	0.37495	0.600765	3.76051e-14
UniRef90_A0A0B4S1W5	1216	0	0.748378	2.49377e-17	0.497139	0.497139	0.382075	0.612203	3.77338e-14
UniRef90_F5TCY9	1262	0	0.988708	2.50237e-17	0.487315	0.487315	0.374519	0.60011	3.77934e-14
UniRef90_A0A174AZB9	1262	0	0.77568	2.52595e-17	0.487583	0.487583	0.374711	0.600455	3.80788e-14
UniRef90_E5XEC2	1262	0	0.817878	2.53776e-17	0.487511	0.487511	0.374648	0.600373	3.8186e-14
UniRef90_A5KJE2	1262	0	0.616279	2.62304e-17	0.487479	0.487479	0.374572	0.600385	3.93444e-14
UniRef90_E5XG58	1262	0	0.977707	2.62443e-17	0.486981	0.486981	0.374189	0.599772	3.93444e-14
UniRef90_E5XDZ5	1262	0	0.868131	2.65132e-17	0.487147	0.487147	0.374301	0.599994	3.96238e-14
UniRef90_E5XHS5	1262	0	0.767277	2.65282e-17	0.487259	0.487259	0.374386	0.600132	3.96238e-14
UniRef90_E5XG16	1262	0	0.83633	2.67705e-17	0.487133	0.487133	0.374275	0.599991	3.99123e-14
UniRef90_A5KIJ8	1262	0	0.824853	2.7202e-17	0.487011	0.487011	0.374156	0.599866	4.04814e-14
UniRef90_A0A174EDD0	1262	0	0.475323	2.73934e-17	0.487336	0.487336	0.374395	0.600277	4.06917e-14
UniRef90_A0A174FIG4	1262	0	0.871432	2.7725e-17	0.486839	0.486839	0.373994	0.599683	4.11091e-14
UniRef90_A0A174D2H0	1262	0	0.580615	2.80318e-17	0.487069	0.487069	0.374154	0.599984	4.14129e-14
UniRef90_A5KMW7	1262	0	0.751816	2.80242e-17	0.48689	0.48689	0.374017	0.599763	4.14129e-14
UniRef90_A8SJK5	1262	0	0.785421	2.81997e-17	0.486858	0.486858	0.373983	0.599734	4.15854e-14
UniRef90_A0A173YP10	1262	0	0.663893	2.85559e-17	0.486838	0.486838	0.373948	0.599728	4.19883e-14
UniRef90_A5KK90	1262	0	0.839022	2.85763e-17	0.486654	0.486654	0.373805	0.599502	4.19883e-14
UniRef90_E5XE25	1262	0	0.855735	2.86535e-17	0.486602	0.486602	0.373761	0.599443	4.20257e-14
UniRef90_A5KN29	1262	0	0.87041	2.87581e-17	0.486578	0.486578	0.373737	0.599418	4.21031e-14
UniRef90_A0A173YGD4	1262	0	0.576059	2.89926e-17	0.486829	0.486829	0.373917	0.599741	4.23606e-14
UniRef90_A5KJ30	1262	0	0.631186	2.90382e-17	0.486757	0.486757	0.373859	0.599654	4.23606e-14
UniRef90_E5XEI2	1262	0	0.518125	2.97331e-17	0.486731	0.486731	0.373802	0.599659	4.32966e-14
UniRef90_A0A173Z834	1262	0	0.721272	3.00259e-17	0.486443	0.486443	0.373566	0.59932	4.36447e-14
UniRef90_E0E553	1262	0	0.857314	3.01791e-17	0.486273	0.486273	0.373428	0.599119	4.37891e-14
UniRef90_A0A173XYL4	1202	0	0.985912	3.02632e-17	0.498458	0.498458	0.38278	0.614135	4.38328e-14
UniRef90_E5XII0	1262	0	0.571787	3.08463e-17	0.486395	0.486395	0.373487	0.599303	4.45979e-14
UniRef90_A0A174AGY0	1262	0	0.631283	3.09347e-17	0.486332	0.486332	0.373434	0.59923	4.46463e-14
UniRef90_A0A173XWV7	1262	0	0.768092	3.13462e-17	0.486105	0.486105	0.373239	0.59897	4.51599e-14
UniRef90_A0A174D6R9	1262	0	0.703812	3.14315e-17	0.486152	0.486152	0.373271	0.599032	4.52026e-14
UniRef90_E5XIL3	1262	0	0.662452	3.15076e-17	0.486186	0.486186	0.373293	0.599078	4.5232e-14
UniRef90_R5QJ42	1262	0	0.982078	3.17213e-17	0.485679	0.485679	0.372894	0.598465	4.54585e-14
UniRef90_A5KLF3	1262	0	0.915948	3.2576e-17	0.485649	0.485649	0.372829	0.598469	4.66012e-14
UniRef90_E5XE26	1262	3.01581	0.499791	3.26686e-17	0.500092	0.500092	0.383913	0.616272	4.66515e-14
UniRef90_A5KKD5	1262	0	0.868072	3.30593e-17	0.485611	0.485611	0.372777	0.598445	4.71267e-14
UniRef90_A5KMF1	1262	0	0.864879	3.38236e-17	0.48546	0.48546	0.372625	0.598295	4.81317e-14
UniRef90_A5KJX8	1262	0	0.757559	3.40049e-17	0.485535	0.485535	0.372675	0.598396	4.8275e-14
UniRef90_A5KMD8	1262	0	0.791276	3.40432e-17	0.485495	0.485495	0.372642	0.598348	4.8275e-14
UniRef90_A0A174AEH6	1262	0	0.613934	3.41286e-17	0.485652	0.485652	0.372759	0.598546	4.83119e-14
UniRef90_A5KPL7	1262	0	0.650801	3.43641e-17	0.485572	0.485572	0.372687	0.598458	4.83924e-14
UniRef90_A5KPS7	1262	0	0.608821	3.43296e-17	0.485666	0.485666	0.37276	0.598572	4.83924e-14
UniRef90_A5KQZ2	1262	0	0.890636	3.43018e-17	0.48531	0.48531	0.372488	0.598132	4.83924e-14
UniRef90_A0A173XVU6	1262	0	0.702977	3.45596e-17	0.485489	0.485489	0.372614	0.598364	4.84995e-14
UniRef90_E5XJF6	1262	0	0.774776	3.45497e-17	0.485393	0.485393	0.37254	0.598245	4.84995e-14
UniRef90_A0A174CDB8	1262	0	0.621628	3.47801e-17	0.485499	0.485499	0.372612	0.598387	4.8641e-14
UniRef90_E5XDX0	1262	0	0.791275	3.47445e-17	0.485352	0.485352	0.3725	0.598204	4.8641e-14
UniRef90_A0A173XW44	1262	0	0.744175	3.49744e-17	0.485371	0.485371	0.372505	0.598238	4.87568e-14
UniRef90_A0A173YFA0	1262	0	0.54939	3.50429e-17	0.485543	0.485543	0.372634	0.598453	4.87568e-14
UniRef90_A0A173Z961	1262	0.0134259	0.478634	3.50134e-17	0.485677	0.485677	0.372738	0.598616	4.87568e-14
UniRef90_A5KQL4	1262	0	0.942674	3.55581e-17	0.485023	0.485023	0.372212	0.597835	4.9389e-14
UniRef90_E5XEE0	1262	0	0.56466	3.56736e-17	0.485398	0.485398	0.372494	0.598302	4.94648e-14
UniRef90_E0E546	1262	0	0.896452	3.57943e-17	0.48506	0.48506	0.372229	0.59789	4.95477e-14
UniRef90_E5XD70	1262	0	0.669366	3.59794e-17	0.485238	0.485238	0.372358	0.598117	4.97192e-14
UniRef90_E5XEV9	1262	0	0.821853	3.61227e-17	0.485054	0.485054	0.37221	0.597897	4.98325e-14
UniRef90_E5XE53	1262	0	0.870524	3.6216e-17	0.484972	0.484972	0.372144	0.597801	4.98765e-14
UniRef90_E5XEY9	1262	0.00219628	0.396975	3.64134e-17	0.48545	0.48545	0.372502	0.598398	5.00634e-14
UniRef90_A0A173XVF1	1262	0	0.614738	3.72826e-17	0.485046	0.485046	0.372155	0.597937	5.10856e-14
UniRef90_A5KQT2	1262	0	0.867194	3.72264e-17	0.484801	0.484801	0.371969	0.597633	5.10856e-14
UniRef90_A0A174EQQ3	1262	0	0.871606	3.77089e-17	0.484689	0.484689	0.371863	0.597515	5.15829e-14
UniRef90_A5KME3	1262	0	0.839868	3.79399e-17	0.484708	0.484708	0.371868	0.597548	5.18115e-14
UniRef90_A0A174C171	1262	0	0.672603	3.80964e-17	0.484836	0.484836	0.37196	0.597712	5.19186e-14
UniRef90_F3AV94	1262	0	0.664926	3.8146e-17	0.484828	0.484828	0.371951	0.597704	5.19186e-14
UniRef90_A5KNK1	1262	0	0.751804	3.83326e-17	0.484727	0.484727	0.371867	0.597588	5.19457e-14
UniRef90_A5KQS9	1262	0	0.728095	3.82553e-17	0.484765	0.484765	0.371899	0.597631	5.19457e-14
UniRef90_E5XG36	1262	0	0.578316	3.83578e-17	0.484881	0.484881	0.371983	0.597778	5.19457e-14
UniRef90_E5XK70	1262	0	0.459387	3.86104e-17	0.484964	0.484964	0.372037	0.597891	5.22009e-14
UniRef90_E5XD81	1262	0	0.839776	3.93116e-17	0.48445	0.48445	0.371614	0.597286	5.30605e-14
UniRef90_E5XG66	1262	0	0.714204	3.94282e-17	0.484564	0.484564	0.371697	0.597431	5.31296e-14
UniRef90_A0A174AEG8	1262	0	0.837806	3.95596e-17	0.484411	0.484411	0.371575	0.597248	5.31305e-14
UniRef90_A5KRA4	1262	0	0.75877	3.95325e-17	0.484514	0.484514	0.371655	0.597374	5.31305e-14
UniRef90_E5XE44	1262	0	0.811869	3.99869e-17	0.484352	0.484352	0.371513	0.597192	5.36158e-14
UniRef90_A0A174D683	1262	0	0.724037	4.04226e-17	0.484372	0.484372	0.37151	0.597233	5.38733e-14
UniRef90_A5KKT5	1262	0	0.644336	4.03532e-17	0.484452	0.484452	0.371575	0.59733	5.38733e-14
UniRef90_A8SMD7	1262	0	0.965639	4.03314e-17	0.484088	0.484088	0.371296	0.59688	5.38733e-14
UniRef90_E5XJA2	1262	0.00310171	0.417902	4.04442e-17	0.484694	0.484694	0.371757	0.597632	5.38733e-14
UniRef90_E5XIS8	1262	0	0.849325	4.05248e-17	0.484208	0.484208	0.371381	0.597035	5.38924e-14
UniRef90_A0A0B4S1T9	1216	0	0.984631	4.06059e-17	0.493323	0.493323	0.378368	0.608277	5.3912e-14
UniRef90_A0A173XR43	1262	0	0.726087	4.1392e-17	0.484194	0.484194	0.371337	0.597052	5.4866e-14
UniRef90_A5KK89	1262	0	0.469788	4.17824e-17	0.484381	0.484381	0.371466	0.597297	5.52255e-14
UniRef90_E5XDB3	1262	0	0.842305	4.17991e-17	0.484004	0.484004	0.371176	0.596832	5.52255e-14
UniRef90_E0E5C4	1262	0	0.863203	4.25106e-17	0.483921	0.483921	0.371086	0.596757	5.60743e-14
UniRef90_A0A173ZM81	1262	0	0.830628	4.33784e-17	0.483771	0.483771	0.370939	0.596603	5.71263e-14
UniRef90_A0A173XHS5	1262	0	0.836156	4.40001e-17	0.483686	0.483686	0.370851	0.596521	5.78512e-14
UniRef90_A0A173ZHD9	1262	0	0.875409	4.4239e-17	0.483571	0.483571	0.370754	0.596388	5.80713e-14
UniRef90_A0A0B4S1E2	1262	0	0.95087	4.46899e-17	0.48344	0.48344	0.370638	0.596242	5.85686e-14
UniRef90_E5XJH5	1262	0	0.564196	4.49912e-17	0.483797	0.483797	0.370901	0.596693	5.88686e-14
UniRef90_E5XJL8	1262	0	0.724697	4.51271e-17	0.483593	0.483593	0.37074	0.596446	5.89515e-14
UniRef90_A5KND0	1262	0	0.735943	4.56991e-17	0.483513	0.483513	0.370659	0.596367	5.95636e-14
UniRef90_E5XG40	1262	0	0.679532	4.58156e-17	0.48353	0.48353	0.370668	0.596392	5.95636e-14
UniRef90_F3AWL9	1262	0	0.571903	4.57809e-17	0.48368	0.48368	0.370784	0.596577	5.95636e-14
UniRef90_A5KLR0	1262	0	0.70886	4.59368e-17	0.483493	0.483493	0.370635	0.59635	5.96257e-14
UniRef90_E5XFM4	1262	0	0.82311	4.60938e-17	0.483373	0.483373	0.370537	0.596208	5.97341e-14
UniRef90_R5R2T0	1262	0	0.582555	4.62875e-17	0.48357	0.48357	0.370682	0.596457	5.98896e-14
UniRef90_A0A173YMS7	1262	0	0.502547	4.65857e-17	0.483622	0.483622	0.370712	0.596533	6.00537e-14
UniRef90_A0A174BI08	1262	0	0.515431	4.6636e-17	0.483576	0.483576	0.370675	0.596477	6.00537e-14
UniRef90_E5XJT2	1262	0	0.904312	4.64936e-17	0.4832	0.4832	0.370391	0.596008	6.00537e-14
UniRef90_A0A173ZA30	1262	0	0.834846	4.69585e-17	0.483211	0.483211	0.370384	0.596038	6.03732e-14
UniRef90_A5KKZ8	1262	0	0.753815	4.7342e-17	0.483251	0.483251	0.370402	0.596099	6.07702e-14
UniRef90_E5XG31	1262	0	0.56124	4.76969e-17	0.48339	0.48339	0.370497	0.596284	6.11292e-14
UniRef90_A5KKE2	1262	0	0.595241	4.82121e-17	0.483235	0.483235	0.370361	0.596109	6.16119e-14
UniRef90_E5XFW5	1262	0	0.865423	4.82252e-17	0.482997	0.482997	0.370178	0.595816	6.16119e-14
UniRef90_E5XH10	1262	0	0.903273	4.87322e-17	0.482871	0.482871	0.370065	0.595677	6.21619e-14
UniRef90_A0A174DZY3	1262	0	0.869184	4.93294e-17	0.482842	0.482842	0.370023	0.59566	6.27267e-14
UniRef90_E5XIN1	1262	0	0.779918	4.92746e-17	0.482935	0.482935	0.370097	0.595774	6.27267e-14
UniRef90_A0A174B751	1262	0	0.772235	5.01432e-17	0.482837	0.482837	0.369994	0.59568	6.34066e-14
UniRef90_A0A174F852	1262	0.000948948	0.476462	5.01763e-17	0.483148	0.483148	0.370231	0.596065	6.34066e-14
UniRef90_E0E4E4	1202	0	0.94829	5.01486e-17	0.494995	0.494995	0.37931	0.610679	6.34066e-14
UniRef90_E5XFI9	1262	0	0.684763	4.99547e-17	0.482943	0.482943	0.370081	0.595805	6.34066e-14
UniRef90_E5XI85	1262	0	0.713139	5.03068e-17	0.482868	0.482868	0.370013	0.595724	6.34729e-14
UniRef90_E5XJH3	1262	0	0.690686	5.12237e-17	0.482751	0.482751	0.369894	0.595608	6.45296e-14
UniRef90_E5XJ91	1262	0	0.810613	5.14449e-17	0.4826	0.4826	0.369772	0.595428	6.47078e-14
UniRef90_A0A233V468	1262	11.2293	0.588707	5.2055e-17	0.533783	0.533783	0.408968	0.658598	6.5374e-14
UniRef90_E5XDC9	1262	0	0.564434	5.2224e-17	0.48274	0.48274	0.369855	0.595625	6.54851e-14
UniRef90_F3AX31	1262	0.0177813	0.459798	5.25121e-17	0.482888	0.482888	0.36996	0.595816	6.57449e-14
UniRef90_E5XJ74	1262	0	0.790893	5.28283e-17	0.48244	0.48244	0.369607	0.595273	6.6039e-14
UniRef90_R5QER9	1262	0	0.897772	5.29803e-17	0.482299	0.482299	0.369495	0.595104	6.61273e-14
UniRef90_A0A135YUP2	1262	0	0.897829	5.32373e-17	0.482302	0.482302	0.369489	0.595115	6.62823e-14
UniRef90_E5XKB0	1262	0	0.912408	5.32676e-17	0.482216	0.482216	0.369423	0.59501	6.62823e-14
UniRef90_A0A174A6Z6	1262	0	0.735509	5.41086e-17	0.482336	0.482336	0.369489	0.595182	6.72259e-14
UniRef90_A0A3B7DGK0	1262	0	0.997648	5.48332e-17	0.481793	0.481793	0.369053	0.594534	6.8022e-14
UniRef90_A0A174C9R7	1262	0	0.925011	5.50176e-17	0.481982	0.481982	0.369192	0.594773	6.81467e-14
UniRef90_A5KMV8	1262	0	0.520269	5.5319e-17	0.4824	0.4824	0.369503	0.595297	6.84158e-14
UniRef90_U2JJW2	1262	0	0.814454	5.58541e-17	0.482089	0.482089	0.36925	0.594928	6.89726e-14
UniRef90_A5KN20	1262	0	0.734684	5.59564e-17	0.482099	0.482099	0.369255	0.594943	6.89941e-14
UniRef90_E5XFW0	1262	0	0.603102	5.63291e-17	0.482183	0.482183	0.369308	0.595057	6.92867e-14
UniRef90_Q8RH45	1262	0	0.88851	5.63643e-17	0.481884	0.481884	0.369079	0.59469	6.92867e-14
UniRef90_A0A173XE17	1262	0	0.819738	5.74458e-17	0.481829	0.481829	0.369006	0.594652	7.04983e-14
UniRef90_A5KIQ7	1262	0	0.728915	5.75234e-17	0.481911	0.481911	0.369067	0.594755	7.04983e-14
UniRef90_F3AWC3	1262	0	0.847851	5.79047e-17	0.481747	0.481747	0.36893	0.594563	7.08587e-14
UniRef90_A0A173XBZ2	1262	0	0.626703	5.83455e-17	0.481927	0.481927	0.369056	0.594797	7.12907e-14
UniRef90_E5XJ89	1262	0	0.910961	5.88422e-17	0.481527	0.481527	0.368737	0.594317	7.17897e-14
UniRef90_A0A0E9FGT4	1262	0	0.928408	5.9297e-17	0.481486	0.481486	0.368693	0.594279	7.22361e-14
UniRef90_E5XJJ4	1262	0	0.869331	5.94673e-17	0.481526	0.481526	0.368719	0.594333	7.23351e-14
UniRef90_A0A174CB45	1262	0	0.672635	5.99355e-17	0.481694	0.481694	0.368835	0.594553	7.27957e-14
UniRef90_E5XJA3	1262	0.00902458	0.487228	6.07743e-17	0.481811	0.481811	0.368902	0.594719	7.37043e-14
UniRef90_E5XHH5	1262	0	0.541909	6.11823e-17	0.481666	0.481666	0.368781	0.594551	7.40885e-14
UniRef90_A0A173XW11	1262	0	0.730298	6.15516e-17	0.481449	0.481449	0.368605	0.594292	7.43141e-14
UniRef90_E5XFY7	1262	0	0.527804	6.14763e-17	0.48166	0.48166	0.368769	0.594551	7.43141e-14
UniRef90_E5XH12	1262	0	0.627163	6.17278e-17	0.481524	0.481524	0.368658	0.594389	7.44163e-14
UniRef90_E5XE04	1262	0	0.535057	6.27956e-17	0.481505	0.481505	0.368617	0.594394	7.55915e-14
UniRef90_A5KLN2	1262	0	0.514321	6.30206e-17	0.481497	0.481497	0.368604	0.594389	7.57501e-14
UniRef90_A5KIN7	1262	0	0.697183	6.34817e-17	0.481237	0.481237	0.368394	0.59408	7.59677e-14
UniRef90_A5KPU2	1262	0	0.827226	6.34821e-17	0.481123	0.481123	0.368307	0.59394	7.59677e-14
UniRef90_F3AV76	1262	0	0.559604	6.33382e-17	0.481419	0.481419	0.368537	0.594301	7.59677e-14
UniRef90_E5XEQ1	1262	0	0.672826	6.38405e-17	0.481256	0.481256	0.368399	0.594112	7.62843e-14
UniRef90_A0A173ZE90	1262	0	0.738119	6.44649e-17	0.481103	0.481103	0.368267	0.59394	7.68045e-14
UniRef90_A0A173ZUD6	1262	0	0.601018	6.44232e-17	0.481256	0.481256	0.368385	0.594127	7.68045e-14
UniRef90_R5ABW9	1262	0	0.986594	6.47028e-17	0.480724	0.480724	0.367971	0.593477	7.6975e-14
UniRef90_E5XF58	1262	0	0.842716	6.49561e-17	0.480943	0.480943	0.368132	0.593753	7.71634e-14
UniRef90_A0A173Y6M2	1262	0	0.770824	6.52175e-17	0.481002	0.481002	0.368171	0.593833	7.73608e-14
UniRef90_A0A174C8P7	1262	0	0.8363	6.55559e-17	0.480869	0.480869	0.368061	0.593677	7.76489e-14
UniRef90_A0A174B5P5	1262	0	0.737447	6.62572e-17	0.480917	0.480917	0.368081	0.593754	7.83414e-14
UniRef90_A0A174C137	1262	0	0.889113	6.63334e-17	0.480747	0.480747	0.367949	0.593545	7.83414e-14
UniRef90_A5KP68	1262	0	0.693873	6.65004e-17	0.480938	0.480938	0.368091	0.593785	7.84246e-14
UniRef90_E5XF30	1262	0	0.597559	6.66691e-17	0.481002	0.481002	0.368136	0.593869	7.85096e-14
UniRef90_A0A173ZNJ7	1262	0	0.865935	6.76623e-17	0.480605	0.480605	0.367808	0.593401	7.95639e-14
UniRef90_E5XE01	1262	0	0.748098	6.77881e-17	0.480752	0.480752	0.367918	0.593586	7.95966e-14
UniRef90_A0A174EHQ2	1262	0	0.550117	6.80546e-17	0.480915	0.480915	0.368037	0.593794	7.96807e-14
UniRef90_A5KMG9	1262	0	0.66776	6.80558e-17	0.480818	0.480818	0.367962	0.593674	7.96807e-14
UniRef90_E5XJN2	1262	0	0.749653	6.82615e-17	0.480674	0.480674	0.367847	0.5935	7.98065e-14
UniRef90_A5KKT2	1262	0	0.744824	6.85731e-17	0.480673	0.480673	0.367839	0.593506	8.00556e-14
UniRef90_A0A174DYX9	1262	0.000587659	0.333982	6.88238e-17	0.481071	0.481071	0.368138	0.594004	8.01491e-14
UniRef90_E5XDG4	1262	0	0.582688	6.88504e-17	0.480802	0.480802	0.367932	0.593673	8.01491e-14
UniRef90_A0A174D5Z0	1262	0	0.756067	6.95508e-17	0.480553	0.480553	0.367725	0.593382	8.08034e-14
UniRef90_E5XIQ2	1262	0	0.756798	6.96114e-17	0.48055	0.48055	0.367721	0.593379	8.08034e-14
UniRef90_A0A174CFR6	1262	0.0163827	0.469305	7.03528e-17	0.480833	0.480833	0.367921	0.593746	8.15475e-14
UniRef90_A5KIJ7	1262	0	0.568485	7.22345e-17	0.48047	0.48047	0.367601	0.593339	8.36093e-14
UniRef90_A0A173Z5S1	1262	0.0208335	0.50552	7.24537e-17	0.480594	0.480594	0.36769	0.593497	8.36249e-14
UniRef90_E5XJJ2	1262	0	0.722586	7.23902e-17	0.480293	0.480293	0.367462	0.593124	8.36249e-14
UniRef90_E5XDJ7	1262	0	0.594334	7.27799e-17	0.480404	0.480404	0.367539	0.59327	8.38821e-14
UniRef90_A5KQX4	1262	0.00107856	0.453334	7.29444e-17	0.480516	0.480516	0.367621	0.593412	8.39527e-14
UniRef90_A0A173XHZ8	1202	0	0.812559	7.34863e-17	0.492389	0.492389	0.376691	0.608086	8.39544e-14
UniRef90_A0A174DLT1	1262	0	0.605473	7.31938e-17	0.480357	0.480357	0.367493	0.59322	8.39544e-14
UniRef90_A0A174DNC4	1262	0	0.800989	7.32467e-17	0.480157	0.480157	0.367339	0.592974	8.39544e-14
UniRef90_A0A174ELH1	1262	0	0.618277	7.33318e-17	0.480336	0.480336	0.367474	0.593198	8.39544e-14
UniRef90_A5KPX7	1262	0	0.686547	7.34635e-17	0.480245	0.480245	0.367402	0.593089	8.39544e-14
UniRef90_E5XF11	1262	0	0.626858	7.35658e-17	0.4803	0.4803	0.367442	0.593159	8.39544e-14
UniRef90_A0A174DCG7	1262	0	0.599172	7.50052e-17	0.480188	0.480188	0.367325	0.593052	8.5477e-14
UniRef90_A5KMD9	1262	0	0.832678	7.57374e-17	0.479878	0.479878	0.367072	0.592684	8.61905e-14
UniRef90_A5KQQ6	1262	0	0.821257	7.61297e-17	0.479861	0.479861	0.367051	0.592671	8.65159e-14
UniRef90_A0A174D0L9	1262	0	0.699229	7.72167e-17	0.479871	0.479871	0.367036	0.592707	8.76286e-14
UniRef90_E5XDI2	1262	0	0.865383	7.73647e-17	0.479696	0.479696	0.366899	0.592493	8.7674e-14
UniRef90_E5XKD6	1262	0	0.839288	7.78987e-17	0.479654	0.479654	0.366855	0.592452	8.81563e-14
UniRef90_A0A174BZY7	1262	0	0.730794	7.81913e-17	0.47978	0.47978	0.366946	0.592614	8.83643e-14
UniRef90_A0A174E2R2	1262	0	0.843481	7.85598e-17	0.479627	0.479627	0.366821	0.592432	8.86575e-14
UniRef90_A5KKM4	1262	0	0.75563	7.91374e-17	0.479658	0.479658	0.366834	0.592483	8.91855e-14
UniRef90_A0A173XVQ2	1262	0	0.80972	7.93709e-17	0.47957	0.47957	0.366762	0.592379	8.93247e-14
UniRef90_A0A173Y5H3	1262	0	0.789961	8.06719e-17	0.479487	0.479487	0.366672	0.592302	9.06633e-14
UniRef90_A0A173ZVN5	1262	0	0.691475	8.07978e-17	0.47959	0.47959	0.366748	0.592431	9.06793e-14
UniRef90_E5XGQ4	1262	0.0116448	0.572361	8.12456e-17	0.479677	0.479677	0.366806	0.592548	9.10561e-14
UniRef90_A0A173ZAD0	1262	0	0.730419	8.14592e-17	0.479457	0.479457	0.366634	0.592281	9.11698e-14
UniRef90_A0A173YHF7	1262	0	0.652418	8.23908e-17	0.479479	0.479479	0.366632	0.592326	9.19626e-14
UniRef90_E5XGQ6	1262	0.00946326	0.32077	8.23939e-17	0.47988	0.47988	0.366939	0.592822	9.19626e-14
UniRef90_A0A174CKZ0	1262	0	0.752682	8.28587e-17	0.479353	0.479353	0.366527	0.59218	9.23545e-14
UniRef90_E5XH57	1262	0	0.654066	8.32474e-17	0.479406	0.479406	0.36656	0.592253	9.26606e-14
UniRef90_E5XDF3	1262	0	0.813505	8.4754e-17	0.479101	0.479101	0.366297	0.591904	9.41961e-14
UniRef90_E5XHZ0	1262	0	0.662062	8.48588e-17	0.479256	0.479256	0.366414	0.592098	9.41961e-14
UniRef90_K4Q9Z3	1202	0	0.79612	8.54167e-17	0.491343	0.491343	0.375644	0.607041	9.46861e-14
UniRef90_A0A0B4S2J1	1262	0	0.979582	8.61505e-17	0.478726	0.478726	0.365985	0.591467	9.51449e-14
UniRef90_A0A174B414	1262	0	0.878829	8.61819e-17	0.478906	0.478906	0.366122	0.591691	9.51449e-14
UniRef90_A5KLT3	1262	0.0239924	0.561399	8.61189e-17	0.479351	0.479351	0.366463	0.592238	9.51449e-14
UniRef90_A0A174AAP0	1262	0	0.516264	8.67541e-17	0.479246	0.479246	0.366371	0.592121	9.55171e-14
UniRef90_A5KK49	1262	0	0.750954	8.66633e-17	0.479028	0.479028	0.366206	0.591849	9.55171e-14
UniRef90_A0A174DNY4	1262	0	0.667287	8.73782e-17	0.479039	0.479039	0.366201	0.591877	9.6074e-14
UniRef90_A5KM09	1262	0	0.864039	8.79525e-17	0.478799	0.478799	0.366007	0.59159	9.65748e-14
UniRef90_E5XFI3	1262	0	0.827139	8.83453e-17	0.4788	0.4788	0.366001	0.591599	9.68752e-14
UniRef90_E5XEC9	1262	0.000143635	0.425947	8.8842e-17	0.479161	0.479161	0.366268	0.592054	9.72187e-14
UniRef90_E5XEG8	1262	0	0.859246	8.88978e-17	0.478721	0.478721	0.365931	0.591512	9.72187e-14
UniRef90_A0A174DDI9	1262	0	0.649994	9.04148e-17	0.478821	0.478821	0.36598	0.591662	9.86374e-14
UniRef90_E5XF22	1262	0	0.553613	9.04379e-17	0.478906	0.478906	0.366044	0.591768	9.86374e-14
UniRef90_E5XF52	1262	0	0.582584	9.12257e-17	0.478818	0.478818	0.365963	0.591672	9.93633e-14
UniRef90_E5XG55	1262	0	0.74548	9.28799e-17	0.478563	0.478563	0.365739	0.591386	1.0103e-13
UniRef90_A5KJJ6	1262	0	0.673641	9.32797e-17	0.478579	0.478579	0.365744	0.591413	1.01329e-13
UniRef90_A5KPS4	1262	0	0.971185	9.42505e-17	0.478138	0.478138	0.365391	0.590885	1.02212e-13
UniRef90_E5XIS3	1262	0.00555448	0.585059	9.43447e-17	0.478637	0.478637	0.365771	0.591504	1.02212e-13
UniRef90_A0A173XRV5	1262	0	0.6071	9.49539e-17	0.478525	0.478525	0.365674	0.591375	1.02501e-13
UniRef90_A5KNH0	1262	0	0.803784	9.48134e-17	0.478328	0.478328	0.365526	0.591129	1.02501e-13
UniRef90_E5XFB0	1262	0	0.522697	9.49897e-17	0.478583	0.478583	0.365719	0.591448	1.02501e-13
UniRef90_E5XDD5	1262	0	0.665655	9.57901e-17	0.478398	0.478398	0.365564	0.591233	1.03148e-13
UniRef90_E5XFI4	1262	0	0.612542	9.58431e-17	0.478442	0.478442	0.365596	0.591288	1.03148e-13
UniRef90_A0A174E7G0	1262	0	0.58608	9.61082e-17	0.478459	0.478459	0.365605	0.591314	1.03162e-13
UniRef90_A5KNY1	1262	0	0.621515	9.61099e-17	0.478415	0.478415	0.365571	0.591259	1.03162e-13
UniRef90_A0A174CQM0	1262	0	0.636867	9.63249e-17	0.478405	0.478405	0.36556	0.59125	1.03256e-13
UniRef90_A0A174F494	1262	0	0.626865	9.66995e-17	0.478367	0.478367	0.365524	0.591209	1.03521e-13
UniRef90_A0A173ZK69	1262	0	0.677191	9.6938e-17	0.478288	0.478288	0.36546	0.591116	1.0364e-13
UniRef90_E5XEQ9	1262	0	0.562793	9.72732e-17	0.478384	0.478384	0.365528	0.591239	1.03862e-13
UniRef90_A0A173ZCG8	1262	0	0.841573	9.74912e-17	0.478081	0.478081	0.365293	0.590869	1.03958e-13
UniRef90_E5XE46	1262	0	0.695194	9.82005e-17	0.478207	0.478207	0.365377	0.591036	1.04577e-13
UniRef90_E5XHM4	1262	0.0210153	0.365174	1.00919e-16	0.47845	0.47845	0.365519	0.591381	1.07331e-13
UniRef90_E5XFX8	1262	0	0.826768	1.0251e-16	0.477756	0.477756	0.364964	0.590549	1.08881e-13
UniRef90_E5XEP4	1262	0	0.65285	1.02832e-16	0.477925	0.477925	0.365088	0.590762	1.08938e-13
UniRef90_R5ADY6	1262	0	0.739627	1.02738e-16	0.477915	0.477915	0.365082	0.590749	1.08938e-13
UniRef90_A0A174BZR4	1262	0	0.710558	1.03898e-16	0.477788	0.477788	0.364967	0.59061	1.09883e-13
UniRef90_E5XJD3	1262	0	0.82991	1.03994e-16	0.477682	0.477682	0.364884	0.59048	1.09883e-13
UniRef90_A5KKW4	1262	0	0.610879	1.06236e-16	0.47772	0.47772	0.364879	0.590562	1.12105e-13
UniRef90_A0A173YV86	1262	0	0.837001	1.06797e-16	0.477467	0.477467	0.364677	0.590257	1.12405e-13
UniRef90_E5XIX0	1262	0.00041805	0.407796	1.06698e-16	0.477915	0.477915	0.36502	0.590809	1.12405e-13
UniRef90_E5XDS0	1262	0	0.551896	1.07296e-16	0.477724	0.477724	0.364865	0.590582	1.12639e-13
UniRef90_E5XGL3	1262	0	0.643246	1.07202e-16	0.477646	0.477646	0.364807	0.590484	1.12639e-13
UniRef90_A0A173XZP7	1262	0	0.553076	1.0802e-16	0.477668	0.477668	0.364812	0.590524	1.12755e-13
UniRef90_A0A173YIV1	1262	0	0.793148	1.08338e-16	0.477413	0.477413	0.364612	0.590213	1.12755e-13
UniRef90_A0A174BX07	1262	0	0.679888	1.08045e-16	0.477532	0.477532	0.364708	0.590357	1.12755e-13
UniRef90_A0A174DI95	1262	0	0.624785	1.08267e-16	0.477617	0.477617	0.364769	0.590465	1.12755e-13
UniRef90_A0A174DM04	1262	0	0.83921	1.08377e-16	0.477338	0.477338	0.364554	0.590121	1.12755e-13
UniRef90_A0A174E4A7	1262	0	0.67722	1.07742e-16	0.477558	0.477558	0.364732	0.590384	1.12755e-13
UniRef90_E5XIG9	1262	0	0.570291	1.08221e-16	0.477645	0.477645	0.364791	0.590498	1.12755e-13
UniRef90_A0A174AI64	1262	0	0.920293	1.08732e-16	0.477228	0.477228	0.364465	0.589991	1.12979e-13
UniRef90_A5KLV9	1262	0	0.853534	1.09229e-16	0.477262	0.477262	0.364484	0.59004	1.1335e-13
UniRef90_A0A174A7Z8	1262	0	0.669967	1.09772e-16	0.477443	0.477443	0.364614	0.590272	1.13769e-13
UniRef90_A5KNN0	1262	0	0.842511	1.10349e-16	0.477224	0.477224	0.364438	0.590009	1.14221e-13
UniRef90_A0A174DRN6	1262	0	0.666725	1.11463e-16	0.477325	0.477325	0.364499	0.590151	1.15093e-13
UniRef90_A0A174EPB6	1262	0	0.811622	1.11554e-16	0.47719	0.47719	0.364395	0.589986	1.15093e-13
UniRef90_A0A174F7H0	1262	0	0.762542	1.11987e-16	0.477212	0.477212	0.364405	0.590019	1.15093e-13
UniRef90_A5KMF9	1262	0	0.784127	1.11901e-16	0.477193	0.477193	0.364392	0.589994	1.15093e-13
UniRef90_A5KMQ1	1262	0	0.647856	1.12042e-16	0.47733	0.47733	0.364494	0.590165	1.15093e-13
UniRef90_E5XG08	1262	0	0.75923	1.11814e-16	0.477235	0.477235	0.364425	0.590045	1.15093e-13
UniRef90_A0A173YAC4	1262	0	0.917681	1.1283e-16	0.476962	0.476962	0.364202	0.589722	1.15757e-13
UniRef90_E5XJ68	1262	0	0.633188	1.13421e-16	0.477216	0.477216	0.364387	0.590044	1.16096e-13
UniRef90_E5XJ70	1262	0	0.722117	1.13446e-16	0.477159	0.477159	0.364344	0.589974	1.16096e-13
UniRef90_A5KPT4	1262	0	0.807498	1.14808e-16	0.476986	0.476986	0.364193	0.58978	1.17342e-13
UniRef90_A0A174D620	1262	0	0.836935	1.15348e-16	0.476921	0.476921	0.364135	0.589707	1.17746e-13
UniRef90_A5KLP1	1262	0	0.660513	1.16282e-16	0.477029	0.477029	0.364205	0.589853	1.1855e-13
UniRef90_A0A174AWA2	1262	0	0.622393	1.16551e-16	0.477071	0.477071	0.364233	0.589909	1.18675e-13
UniRef90_E5XFP6	1262	0	0.952939	1.16837e-16	0.476651	0.476651	0.363908	0.589393	1.18818e-13
UniRef90_E5XG30	1262	0.00878554	0.48482	1.17584e-16	0.477162	0.477162	0.364288	0.590036	1.19279e-13
UniRef90_E5XK79	1262	0	0.524439	1.17478e-16	0.477118	0.477118	0.364256	0.58998	1.19279e-13
UniRef90_E5XJU8	1262	0	0.930511	1.17888e-16	0.47666	0.47666	0.363901	0.58942	1.19438e-13
UniRef90_A5KMD0	1262	0	0.774787	1.18064e-16	0.476823	0.476823	0.364023	0.589624	1.19467e-13
UniRef90_E5XJ35	1262	0	0.8851	1.18294e-16	0.476686	0.476686	0.363915	0.589457	1.19551e-13
UniRef90_A0A174B4Q6	1262	0	0.857406	1.19452e-16	0.476647	0.476647	0.363869	0.589425	1.20422e-13
UniRef90_E5XE35	1262	0	0.918103	1.19368e-16	0.476578	0.476578	0.363818	0.589338	1.20422e-13
UniRef90_A5KKB3	1262	0.0133419	0.395164	1.20022e-16	0.477152	0.477152	0.364247	0.590057	1.20847e-13
UniRef90_E5XEJ3	1262	0	0.66812	1.20485e-16	0.476796	0.476796	0.363969	0.589622	1.21163e-13
UniRef90_E5XJY9	1262	0	0.694267	1.2098e-16	0.476738	0.476738	0.363919	0.589558	1.2151e-13
UniRef90_A0A173ZYZ7	1262	0	0.807315	1.21305e-16	0.476607	0.476607	0.363814	0.5894	1.21686e-13
UniRef90_A0A173XYF9	1262	0	0.51353	1.22251e-16	0.476832	0.476832	0.363973	0.589691	1.2217e-13
UniRef90_E5XDB9	1262	0	0.846334	1.21938e-16	0.476516	0.476516	0.363736	0.589296	1.2217e-13
UniRef90_E5XEV2	1262	0	0.756414	1.22389e-16	0.476592	0.476592	0.363788	0.589396	1.2217e-13
UniRef90_E5XJ62	1262	0	0.68684	1.22299e-16	0.476659	0.476659	0.363841	0.589478	1.2217e-13
UniRef90_A0A173XXL4	1262	0	0.88757	1.23131e-16	0.476383	0.476383	0.363619	0.589147	1.2245e-13
UniRef90_A5KQ53	1262	0	0.71851	1.23559e-16	0.476558	0.476558	0.363747	0.58937	1.2245e-13
UniRef90_E5XHM2	1262	0	0.932497	1.2354e-16	0.476307	0.476307	0.363556	0.589059	1.2245e-13
UniRef90_E5XI36	1262	0	0.803552	1.22941e-16	0.476497	0.476497	0.363708	0.589286	1.2245e-13
UniRef90_E5XI37	1262	0	0.65232	1.23724e-16	0.476608	0.476608	0.363783	0.589434	1.2245e-13
UniRef90_E5XJ33	1262	0	0.84186	1.23154e-16	0.47644	0.47644	0.363662	0.589218	1.2245e-13
UniRef90_E5XK07	1262	0	0.72335	1.23616e-16	0.476556	0.476556	0.363744	0.589368	1.2245e-13
UniRef90_E5XF53	1262	0	0.591863	1.24186e-16	0.476643	0.476643	0.363803	0.589483	1.22758e-13
UniRef90_E5XIM3	1262	0	0.755493	1.25108e-16	0.476431	0.476431	0.363629	0.589232	1.23518e-13
UniRef90_A0A173XV76	1262	0	0.690139	1.25396e-16	0.476487	0.476487	0.363668	0.589305	1.23652e-13
UniRef90_A0A174AAY4	1262	0	0.538981	1.25976e-16	0.476566	0.476566	0.363721	0.589411	1.24074e-13
UniRef90_A0A173YB51	1262	0	0.83967	1.26793e-16	0.476242	0.476242	0.363464	0.589021	1.24518e-13
UniRef90_A0A173YLE9	1262	0	0.674295	1.26677e-16	0.476442	0.476442	0.363618	0.589267	1.24518e-13
UniRef90_A0A174EAH0	1262	0	0.530114	1.2704e-16	0.476575	0.476575	0.363715	0.589436	1.24518e-13
UniRef90_E5XE73	1262	0	0.900385	1.26907e-16	0.476161	0.476161	0.3634	0.588922	1.24518e-13
UniRef90_A5KMT2	1262	0.00783544	0.411842	1.2752e-16	0.476661	0.476661	0.363774	0.589548	1.24838e-13
UniRef90_E5XE15	1262	0	0.699881	1.28013e-16	0.476347	0.476347	0.363528	0.589165	1.25062e-13
UniRef90_E5XF96	1262	0	0.910919	1.28056e-16	0.476079	0.476079	0.363323	0.588835	1.25062e-13
UniRef90_R5QTB8	1262	0	0.832202	1.28405e-16	0.47617	0.47617	0.363388	0.588952	1.25252e-13
UniRef90_A0A174C620	1262	0	0.638808	1.28731e-16	0.476346	0.476346	0.363518	0.589174	1.25363e-13
UniRef90_A0A174CFL4	1262	0	0.734498	1.29091e-16	0.476223	0.476223	0.36342	0.589026	1.25363e-13
UniRef90_A0A174D149	1262	0	0.87598	1.29136e-16	0.47607	0.47607	0.363303	0.588838	1.25363e-13
UniRef90_E5XFD1	1262	0	0.556712	1.29087e-16	0.476413	0.476413	0.363565	0.589261	1.25363e-13
UniRef90_A0A174CEF4	1262	0	0.720318	1.30001e-16	0.4762	0.4762	0.363391	0.589009	1.25752e-13
UniRef90_A5KP10	1262	0	0.896879	1.29889e-16	0.476022	0.476022	0.363257	0.588788	1.25752e-13
UniRef90_F3AVC1	1262	0	0.582174	1.29989e-16	0.476351	0.476351	0.363506	0.589196	1.25752e-13
UniRef90_A0A173Y5J2	1262	0	0.922737	1.30615e-16	0.475936	0.475936	0.363181	0.58869	1.26195e-13
UniRef90_E5XDF2	1262	0	0.712598	1.3103e-16	0.476136	0.476136	0.363329	0.588943	1.26381e-13
UniRef90_E5XHC9	1262	0	0.790742	1.31118e-16	0.476071	0.476071	0.363279	0.588864	1.26381e-13
UniRef90_A0A174AKD5	1262	0	0.862119	1.33079e-16	0.475862	0.475862	0.363095	0.588629	1.28119e-13
UniRef90_Q7P896	1262	0	0.883972	1.34202e-16	0.475787	0.475787	0.363024	0.588551	1.29048e-13
UniRef90_E5XDX1	1262	0	0.7832	1.34744e-16	0.475878	0.475878	0.363087	0.588669	1.29416e-13
UniRef90_A0A174EMF0	1262	0	0.612849	1.35419e-16	0.476016	0.476016	0.363184	0.588848	1.2991e-13
UniRef90_A5KPZ6	1262	0.00704148	0.432703	1.36187e-16	0.476185	0.476185	0.363304	0.589067	1.30493e-13
UniRef90_E5XDA6	1262	0	0.784646	1.36507e-16	0.4758	0.4758	0.363007	0.588594	1.30646e-13
UniRef90_A0A173YIQ2	1262	0	0.635874	1.37069e-16	0.475903	0.475903	0.363078	0.588728	1.31029e-13
UniRef90_A0A174B2K6	1262	0	0.950613	1.38876e-16	0.475423	0.475423	0.36269	0.588155	1.32396e-13
UniRef90_A0A174DND8	1262	0	0.794651	1.38971e-16	0.475655	0.475655	0.362866	0.588443	1.32396e-13
UniRef90_R5QCR4	1262	0	0.540837	1.38988e-16	0.475894	0.475894	0.363049	0.58874	1.32396e-13
UniRef90_E5XGA9	1262	0	0.567689	1.3918e-16	0.475874	0.475874	0.363031	0.588716	1.32424e-13
UniRef90_E5XIS0	1262	0	0.601747	1.39748e-16	0.475792	0.475792	0.362962	0.588622	1.32809e-13
UniRef90_E5XDT3	1262	0	0.805543	1.42443e-16	0.475456	0.475456	0.362675	0.588238	1.35212e-13
UniRef90_A0A173XZ30	1262	0	0.733343	1.43734e-16	0.475473	0.475473	0.362673	0.588273	1.36279e-13
UniRef90_A5KJI6	1262	0	0.918459	1.45438e-16	0.475162	0.475162	0.362416	0.587908	1.37733e-13
UniRef90_E5XK11	1262	0	0.802702	1.45918e-16	0.4753	0.4753	0.362517	0.588084	1.38027e-13
UniRef90_A0A173XRS6	1262	0	0.764647	1.46624e-16	0.475328	0.475328	0.36253	0.588127	1.38533e-13
UniRef90_Q8RHJ8	1262	0	0.98196	1.48192e-16	0.474924	0.474924	0.362204	0.587643	1.39852e-13
UniRef90_A0A174E6A6	1262	0	0.811249	1.49264e-16	0.475133	0.475133	0.362352	0.587914	1.407e-13
UniRef90_E5XJU5	1262	0	0.771547	1.50143e-16	0.475134	0.475134	0.362343	0.587924	1.41365e-13
UniRef90_E5XFS3	1262	0	0.684074	1.50515e-16	0.475193	0.475193	0.362384	0.588002	1.41551e-13
UniRef90_A0A174BGU2	1262	0	0.822052	1.51361e-16	0.475015	0.475015	0.362239	0.58779	1.42182e-13
UniRef90_A0A173YI40	1262	0	0.823064	1.52122e-16	0.474985	0.474985	0.362208	0.587762	1.42403e-13
UniRef90_E5XFJ8	1262	0	0.549928	1.5181e-16	0.475268	0.475268	0.362427	0.588108	1.42403e-13
UniRef90_R5AA31	1262	0	0.866458	1.52118e-16	0.474988	0.474988	0.362211	0.587766	1.42403e-13
UniRef90_E5XEC8	1262	0	0.495159	1.52334e-16	0.475285	0.475285	0.362434	0.588135	1.42437e-13
UniRef90_E5XIJ0	1262	0	0.628437	1.52678e-16	0.475158	0.475158	0.362334	0.587982	1.42595e-13
UniRef90_E5XK21	1262	0	0.782533	1.52898e-16	0.474986	0.474986	0.362201	0.587772	1.42637e-13
UniRef90_A0A174EYE1	1262	0	0.512791	1.53905e-16	0.475196	0.475196	0.36235	0.588042	1.43108e-13
UniRef90_A5KNV8	1262	0	0.89889	1.53931e-16	0.474774	0.474774	0.362028	0.587519	1.43108e-13
UniRef90_E5XGW6	1262	0	0.969765	1.53607e-16	0.474688	0.474688	0.361966	0.58741	1.43108e-13
UniRef90_A0A174AGP0	1262	0	0.468784	1.54417e-16	0.475237	0.475237	0.362376	0.588098	1.43396e-13
UniRef90_A0A174C020	1262	0	0.787979	1.54953e-16	0.474873	0.474873	0.362093	0.587654	1.43729e-13
UniRef90_E5XG12	1262	0	0.900742	1.55454e-16	0.474732	0.474732	0.36198	0.587484	1.44029e-13
UniRef90_A0A174B2S8	1262	0	0.643952	1.55952e-16	0.474997	0.474997	0.362176	0.587817	1.44326e-13
UniRef90_A0A174DJ02	1262	0	0.786824	1.56656e-16	0.474796	0.474796	0.362016	0.587576	1.44812e-13
UniRef90_A0A173XM53	1262	0	0.539955	1.57997e-16	0.475008	0.475008	0.362163	0.587852	1.45886e-13
UniRef90_A0A0E9EIZ5	1262	0	0.979348	1.59032e-16	0.474451	0.474451	0.361728	0.587173	1.46055e-13
UniRef90_A0A174A1A1	1262	0	0.505624	1.59035e-16	0.474983	0.474983	0.362134	0.587832	1.46055e-13
UniRef90_A0A174CME8	1262	0	0.839652	1.58709e-16	0.474661	0.474661	0.361892	0.58743	1.46055e-13
UniRef90_A5KM23	1262	0	0.929475	1.58583e-16	0.474543	0.474543	0.361803	0.587283	1.46055e-13
UniRef90_E5XFA6	1262	0	0.796321	1.59079e-16	0.474693	0.474693	0.361912	0.587473	1.46055e-13
UniRef90_E5XJZ9	1262	0	0.57479	1.60031e-16	0.474867	0.474867	0.362035	0.587698	1.46764e-13
UniRef90_A5KKA5	1262	0	0.736539	1.6033e-16	0.47471	0.47471	0.361913	0.587507	1.46768e-13
UniRef90_E5XJI1	1262	0	0.903903	1.60397e-16	0.474495	0.474495	0.361748	0.587242	1.46768e-13
UniRef90_E5XIV4	1262	0	0.77871	1.60949e-16	0.474647	0.474647	0.361858	0.587435	1.47107e-13
UniRef90_E5XDW2	1262	0	0.825823	1.61514e-16	0.474571	0.474571	0.361795	0.587348	1.47458e-13
UniRef90_A0A173Z4Q1	1262	0	0.828157	1.62708e-16	0.474501	0.474501	0.361729	0.587273	1.48382e-13
UniRef90_A0A173ZNH1	1262	0	0.589284	1.63538e-16	0.474701	0.474701	0.361874	0.587529	1.48804e-13
UniRef90_F3AVB7	1262	0	0.508733	1.63494e-16	0.474782	0.474782	0.361936	0.587628	1.48804e-13
UniRef90_A0A174DLR6	1262	0	0.870933	1.64151e-16	0.474388	0.474388	0.361629	0.587147	1.48917e-13
UniRef90_E5XDA3	1262	0	0.712124	1.64212e-16	0.474549	0.474549	0.36175	0.587347	1.48917e-13
UniRef90_E5XHH3	1262	0	0.658177	1.63931e-16	0.474628	0.474628	0.361813	0.587442	1.48917e-13
UniRef90_E5XFQ9	1262	0	0.753323	1.64454e-16	0.474505	0.474505	0.361715	0.587295	1.4897e-13
UniRef90_A0A173ZI94	1262	0	0.756698	1.64742e-16	0.474488	0.474488	0.361699	0.587277	1.49065e-13
UniRef90_A5KKL8	1262	0	0.557631	1.65955e-16	0.474627	0.474627	0.361793	0.587461	1.49996e-13
UniRef90_E5XDV7	1262	0	0.5934	1.67216e-16	0.474553	0.474553	0.361724	0.587382	1.50968e-13
UniRef90_A0A173XBN2	1262	0	0.947185	1.71402e-16	0.473952	0.473952	0.361226	0.586678	1.54575e-13
UniRef90_A0A173Y9R9	1262	0	0.76446	1.71963e-16	0.474182	0.474182	0.361395	0.586968	1.54909e-13
UniRef90_A0A174A4V9	1262	0	0.883907	1.73017e-16	0.473988	0.473988	0.361238	0.586739	1.55686e-13
UniRef90_E5XIY9	1262	0	0.812617	1.75442e-16	0.473984	0.473984	0.361212	0.586757	1.57693e-13
UniRef90_A0A174EXR1	1262	0	0.768655	1.7601e-16	0.474004	0.474004	0.361222	0.586786	1.58029e-13
UniRef90_A0A134AIQ1	1262	0	0.947619	1.7803e-16	0.473691	0.473691	0.360965	0.586417	1.58989e-13
UniRef90_A0A174ANZ3	1262	0	0.761031	1.7789e-16	0.473939	0.473939	0.361155	0.586723	1.58989e-13
UniRef90_A5KQR8	1262	0	0.807757	1.78058e-16	0.473909	0.473909	0.361131	0.586688	1.58989e-13
UniRef90_E5XDG9	1262	0	0.710874	1.77477e-16	0.474	0.474	0.361205	0.586795	1.58989e-13
UniRef90_E5XDV9	1262	0	0.66538	1.77735e-16	0.474049	0.474049	0.36124	0.586858	1.58989e-13
UniRef90_A5KK76	1262	0	0.648886	1.79165e-16	0.474004	0.474004	0.361193	0.586815	1.59802e-13
UniRef90_A0A174D1J4	1262	0	0.62592	1.79572e-16	0.474	0.474	0.361186	0.586814	1.59909e-13
UniRef90_A5KJV7	1262	0	0.941559	1.79679e-16	0.473635	0.473635	0.360907	0.586364	1.59909e-13
UniRef90_A5KLG2	1262	0	0.675707	1.80452e-16	0.47391	0.47391	0.36111	0.586711	1.60246e-13
UniRef90_E5XIM6	1262	0	0.88545	1.80357e-16	0.473705	0.473705	0.360954	0.586456	1.60246e-13
UniRef90_E5XDY9	1262	0	0.857284	1.81563e-16	0.473674	0.473674	0.360919	0.586428	1.60961e-13
UniRef90_F3AXX3	1262	0	0.805255	1.81653e-16	0.473742	0.473742	0.36097	0.586514	1.60961e-13
UniRef90_A0A174AMS2	1262	0.00813347	0.477745	1.831e-16	0.474055	0.474055	0.361196	0.586915	1.62067e-13
UniRef90_A5KQR5	1262	0	0.779893	1.8628e-16	0.473604	0.473604	0.360824	0.586385	1.64702e-13
UniRef90_A5KNG7	1262	0.00142532	0.41117	1.86586e-16	0.47393	0.47393	0.36107	0.586791	1.64793e-13
UniRef90_A5KR70	1262	0	0.854564	1.86907e-16	0.473473	0.473473	0.360719	0.586228	1.64872e-13
UniRef90_E5XJ17	1262	0	0.627156	1.87081e-16	0.473727	0.473727	0.36091	0.586543	1.64872e-13
UniRef90_E5XJS7	1262	0	0.662025	1.88685e-16	0.473631	0.473631	0.360823	0.586438	1.66105e-13
UniRef90_E5XEC6	1262	0	0.679671	1.90133e-16	0.473533	0.473533	0.360737	0.58633	1.67198e-13
UniRef90_A5KKE4	1262	0	0.518852	1.92233e-16	0.473609	0.473609	0.360776	0.586442	1.68862e-13
UniRef90_A8SJ09	1262	0	0.981203	1.92485e-16	0.473073	0.473073	0.360366	0.585781	1.68901e-13
UniRef90_A0A174D3L9	1262	0	0.620076	1.93054e-16	0.473482	0.473482	0.360673	0.586292	1.69035e-13
UniRef90_E5XJZ2	1262	0	0.747646	1.93005e-16	0.473382	0.473382	0.360597	0.586167	1.69035e-13
UniRef90_E5XEI0	1262	0	0.701635	1.93817e-16	0.473387	0.473387	0.360594	0.58618	1.69306e-13
UniRef90_E5XEL1	1262	0.684226	0.521502	1.93988e-16	0.476694	0.476694	0.363111	0.590277	1.69306e-13
UniRef90_E5XFJ9	1262	0	0.560097	1.93708e-16	0.473526	0.473526	0.3607	0.586352	1.69306e-13
UniRef90_A5KMX1	1262	0	0.631981	1.94945e-16	0.473422	0.473422	0.360611	0.586234	1.69959e-13
UniRef90_A0A173Y092	1262	0	0.712725	1.9574e-16	0.473313	0.473313	0.360521	0.586105	1.70287e-13
UniRef90_A5KKL7	1262	0	0.452318	1.95549e-16	0.473569	0.473569	0.360717	0.58642	1.70287e-13
UniRef90_A0A174E213	1262	0	0.63941	1.96186e-16	0.473373	0.473373	0.360563	0.586183	1.70492e-13
UniRef90_E5XEK6	1262	0	0.832628	1.96426e-16	0.473157	0.473157	0.360396	0.585918	1.70518e-13
UniRef90_F3AWC6	1262	0	0.506713	1.9756e-16	0.473447	0.473447	0.360608	0.586286	1.71319e-13
UniRef90_A0A174AYT4	1262	0	0.748755	1.97962e-16	0.473198	0.473198	0.360415	0.585981	1.71485e-13
UniRef90_A0A173ZCU8	1262	0	0.623651	1.98371e-16	0.473296	0.473296	0.360486	0.586106	1.71656e-13
UniRef90_A0A173XDW1	1262	0	0.777402	1.9881e-16	0.473142	0.473142	0.360365	0.585919	1.71853e-13
UniRef90_E5XFJ4	1262	0	0.583089	2.00118e-16	0.473272	0.473272	0.360454	0.586091	1.728e-13
UniRef90_A0A174A5U1	1262	0	0.813066	2.0073e-16	0.473028	0.473028	0.360263	0.585794	1.73145e-13
UniRef90_A0A174BXM6	1262	0	0.883836	2.01015e-16	0.472938	0.472938	0.360192	0.585684	1.73207e-13
UniRef90_A0A174DML9	1262	0	0.533145	2.01854e-16	0.473242	0.473242	0.360417	0.586068	1.73745e-13
UniRef90_A0A173XVL0	1262	0	0.830655	2.02128e-16	0.472963	0.472963	0.360201	0.585724	1.73797e-13
UniRef90_E5XEK8	1262	0	0.771687	2.03417e-16	0.472999	0.472999	0.360218	0.585779	1.74721e-13
UniRef90_E5XHP6	1262	0	0.624395	2.06205e-16	0.473024	0.473024	0.360216	0.585833	1.76928e-13
UniRef90_A5KKC3	1262	0	0.782625	2.07883e-16	0.472823	0.472823	0.360049	0.585597	1.78046e-13
UniRef90_A5KN65	1262	0	0.776909	2.07946e-16	0.47282	0.47282	0.360046	0.585594	1.78046e-13
UniRef90_A5KN66	1262	0	0.810906	2.10005e-16	0.47272	0.47272	0.359954	0.585486	1.79619e-13
UniRef90_A0A173YAL7	1262	0	0.895354	2.10363e-16	0.472594	0.472594	0.359855	0.585333	1.79737e-13
UniRef90_A0A173XIE1	1262	0	0.588488	2.10852e-16	0.472891	0.472891	0.360077	0.585705	1.79965e-13
UniRef90_A0A173XY18	1262	0	0.753258	2.11679e-16	0.472721	0.472721	0.359941	0.585501	1.80481e-13
UniRef90_E5XEF0	1262	0	0.897631	2.11967e-16	0.472532	0.472532	0.359795	0.585269	1.80537e-13
UniRef90_E5XE61	1262	0	0.540967	2.12481e-16	0.47289	0.47289	0.360064	0.585717	1.80596e-13
UniRef90_E5XEC3	1262	0	0.651136	2.12304e-16	0.472791	0.472791	0.35999	0.585592	1.80596e-13
UniRef90_A5KR57	1262	0	0.721511	2.147e-16	0.472633	0.472633	0.359851	0.585415	1.82292e-13
UniRef90_A0A173YLK3	1262	0	0.764564	2.15452e-16	0.472578	0.472578	0.359804	0.585353	1.82359e-13
UniRef90_A0A174FIN2	1262	0	0.738886	2.15332e-16	0.472611	0.472611	0.359829	0.585392	1.82359e-13
UniRef90_A5KKM3	1262	0	0.83809	2.15225e-16	0.472508	0.472508	0.359752	0.585265	1.82359e-13
UniRef90_E5XH02	1262	0	0.72376	2.16256e-16	0.472604	0.472604	0.359817	0.58539	1.82849e-13
UniRef90_A5KLM0	1262	0	0.675603	2.16914e-16	0.472612	0.472612	0.359818	0.585406	1.83214e-13
UniRef90_A0A174DKC0	1262	0	0.600943	2.18051e-16	0.472657	0.472657	0.359843	0.58547	1.83984e-13
UniRef90_A0A174E0Q5	1262	0	0.653279	2.18502e-16	0.472592	0.472592	0.359791	0.585393	1.84173e-13
UniRef90_A0A174F1Y3	1262	0	0.693339	2.1965e-16	0.472511	0.472511	0.359721	0.585302	1.84949e-13
UniRef90_A5KQ46	1262	0	0.694741	2.20722e-16	0.472459	0.472459	0.359673	0.585245	1.85659e-13
UniRef90_A0A174B5F6	1262	0	0.705939	2.21271e-16	0.47245	0.47245	0.359662	0.585239	1.85929e-13
UniRef90_A0A174BJP4	1262	0	0.577249	2.22277e-16	0.472537	0.472537	0.359721	0.585354	1.86388e-13
UniRef90_E5XJ58	1262	0	0.761091	2.22086e-16	0.472365	0.472365	0.359591	0.585139	1.86388e-13
UniRef90_A5KNY8	1262	0	0.856357	2.22648e-16	0.472234	0.472234	0.359488	0.584981	1.86507e-13
UniRef90_E5XDN6	1262	0	0.58758	2.23861e-16	0.472484	0.472484	0.359668	0.585299	1.8733e-13
UniRef90_E5XEJ4	1262	0	0.761017	2.24946e-16	0.472269	0.472269	0.359497	0.585041	1.88044e-13
UniRef90_A0A174DYJ4	1262	0	0.723129	2.25676e-16	0.472306	0.472306	0.359519	0.585092	1.88461e-13
UniRef90_A0A174AM97	1262	0	0.815804	2.26184e-16	0.47218	0.47218	0.35942	0.58494	1.88497e-13
UniRef90_E5XDQ3	1262	0	0.691991	2.26119e-16	0.472296	0.472296	0.359509	0.585083	1.88497e-13
UniRef90_A0A173XWD6	1262	0	0.480406	2.27098e-16	0.472466	0.472466	0.359631	0.5853	1.89065e-13
UniRef90_A0A173XBK3	1262	0	0.609862	2.28384e-16	0.472308	0.472308	0.359502	0.585115	1.89941e-13
UniRef90_R5AEI5	1262	0	0.839084	2.29475e-16	0.472133	0.472133	0.359361	0.584906	1.90653e-13
UniRef90_E5XF13	1262	0	0.50491	2.30118e-16	0.472346	0.472346	0.359518	0.585173	1.90992e-13
UniRef90_A5KME0	1262	0	0.591285	2.3056e-16	0.472254	0.472254	0.359445	0.585064	1.91163e-13
UniRef90_A5KK81	1262	0	0.888046	2.31116e-16	0.471939	0.471939	0.359201	0.584676	1.91429e-13
UniRef90_A5KKP6	1262	0	0.851647	2.31504e-16	0.471969	0.471969	0.359221	0.584717	1.91555e-13
UniRef90_A0A174EGP1	1262	0	0.747635	2.32091e-16	0.472078	0.472078	0.3593	0.584856	1.91758e-13
UniRef90_E5XEN2	1262	0	0.845885	2.32456e-16	0.471947	0.471947	0.359197	0.584696	1.91758e-13
UniRef90_E5XHV0	1262	0	0.916731	2.32242e-16	0.471865	0.471865	0.359137	0.584594	1.91758e-13
UniRef90_E0E0Y9	1202	0	0.967365	2.3369e-16	0.483831	0.483831	0.368233	0.599428	1.9258e-13
UniRef90_E5XK67	1262	0	0.704831	2.35289e-16	0.471996	0.471996	0.359215	0.584777	1.93701e-13
UniRef90_A0A096A2K0	1202	0	0.96126	2.36647e-16	0.483735	0.483735	0.368139	0.599331	1.94066e-13
UniRef90_A0A173YVR8	1262	0	0.928248	2.36687e-16	0.471705	0.471705	0.358984	0.584427	1.94066e-13
UniRef90_A5KMG1	1262	0	0.674484	2.36551e-16	0.472008	0.472008	0.359215	0.584801	1.94066e-13
UniRef90_E5XFM8	1262	0	0.652122	2.36237e-16	0.472053	0.472053	0.359251	0.584854	1.94066e-13
UniRef90_E5XF33	1262	0	0.535354	2.37982e-16	0.472065	0.472065	0.359249	0.584882	1.94734e-13
UniRef90_E5XG42	1262	0	0.72584	2.37911e-16	0.471922	0.471922	0.35914	0.584703	1.94734e-13
UniRef90_A0A173YU71	1262	0	0.87874	2.38611e-16	0.471723	0.471723	0.358984	0.584462	1.94856e-13
UniRef90_A5KKV0	1262	0	0.774407	2.38523e-16	0.471842	0.471842	0.359075	0.584608	1.94856e-13
UniRef90_E5XDH7	1262	0	0.689027	2.39794e-16	0.47188	0.47188	0.359096	0.584665	1.9543e-13
UniRef90_E5XF00	1262	0	0.589846	2.39586e-16	0.472017	0.472017	0.359201	0.584833	1.9543e-13
UniRef90_A0A174E0S0	1262	0	0.762762	2.43517e-16	0.471718	0.471718	0.358947	0.58449	1.98265e-13
UniRef90_E5XK54	1262	0	0.856579	2.4413e-16	0.471583	0.471583	0.35884	0.584327	1.98565e-13
UniRef90_E5XFP7	1262	0	0.842285	2.45546e-16	0.471558	0.471558	0.358811	0.584306	1.99518e-13
UniRef90_F3AX22	1262	0	0.765436	2.47539e-16	0.471588	0.471588	0.358821	0.584356	2.00935e-13
UniRef90_E5XG25	1262	0	0.735401	2.47895e-16	0.471603	0.471603	0.358829	0.584376	2.01024e-13
UniRef90_E5XHU9	1262	0	0.857385	2.48463e-16	0.471461	0.471461	0.358718	0.584204	2.01283e-13
UniRef90_A0A174EDG5	1262	0	0.748417	2.49328e-16	0.47155	0.47155	0.35878	0.584321	2.01783e-13
UniRef90_A0A174DZP9	1262	0	0.894132	2.55356e-16	0.4712	0.4712	0.358474	0.583926	2.06251e-13
UniRef90_E5XD85	1262	0	0.529807	2.55205e-16	0.471593	0.471593	0.358774	0.584412	2.06251e-13
UniRef90_A5KPS8	1262	0	0.940883	2.55945e-16	0.471142	0.471142	0.358426	0.583858	2.06521e-13
UniRef90_A0A173ZR91	1262	0	0.564601	2.56619e-16	0.471514	0.471514	0.358705	0.584324	2.06655e-13
UniRef90_E5XJ10	1262	0	0.831868	2.56411e-16	0.471275	0.471275	0.358524	0.584026	2.06655e-13
UniRef90_A0A173ZU84	1262	0	0.586766	2.57144e-16	0.471501	0.471501	0.358691	0.584311	2.06668e-13
UniRef90_A5KM47	1262	0	0.888651	2.56953e-16	0.471194	0.471194	0.358459	0.583929	2.06668e-13
UniRef90_E5XER4	1262	0	0.700415	2.57591e-16	0.471374	0.471374	0.358592	0.584156	2.06823e-13
UniRef90_E5XKB8	1262	0	0.900912	2.58353e-16	0.471128	0.471128	0.3584	0.583856	2.07229e-13
UniRef90_F3A4M3	1202	0	0.910346	2.59497e-16	0.48314	0.48314	0.36753	0.59875	2.07942e-13
UniRef90_E5XDJ9	1262	0	0.808562	2.60545e-16	0.471176	0.471176	0.358422	0.583929	2.08576e-13
UniRef90_A0A173Y7F2	1262	0	0.867199	2.61106e-16	0.471102	0.471102	0.358363	0.583842	2.08698e-13
UniRef90_A0A174DHL5	1262	0	0.707706	2.61211e-16	0.471253	0.471253	0.358476	0.584029	2.08698e-13
UniRef90_A5KK24	1262	0.00018721	0.356244	2.61836e-16	0.471575	0.471575	0.358718	0.584433	2.08992e-13
UniRef90_A0A174C0I0	1262	0	0.833632	2.6231e-16	0.471112	0.471112	0.358363	0.583862	2.09125e-13
UniRef90_E5XK24	1262	0	0.737271	2.62518e-16	0.471184	0.471184	0.358416	0.583952	2.09125e-13
UniRef90_A0A174CNR9	1262	0	0.860677	2.6399e-16	0.471043	0.471043	0.358299	0.583786	2.10092e-13
UniRef90_E5XI83	1262	0	0.749223	2.6509e-16	0.471112	0.471112	0.358345	0.583879	2.10761e-13
UniRef90_E5XDH2	1262	0	0.518246	2.68465e-16	0.471245	0.471245	0.358425	0.584065	2.13235e-13
UniRef90_A0A173ZP26	1262	0	0.836598	2.69197e-16	0.47091	0.47091	0.358166	0.583654	2.13608e-13
UniRef90_A5KK15	1262	0	0.79341	2.70303e-16	0.470926	0.470926	0.358171	0.58368	2.14276e-13
UniRef90_A0A173YNL6	1262	0	0.770326	2.72441e-16	0.470906	0.470906	0.358143	0.583669	2.15346e-13
UniRef90_A5KKZ4	1262	0	0.741231	2.72383e-16	0.470931	0.470931	0.358162	0.583699	2.15346e-13
UniRef90_E5XJ25	1262	0	0.86743	2.72712e-16	0.470788	0.470788	0.358051	0.583524	2.15346e-13
UniRef90_F3ASG1	1202	0.000355815	0.464682	2.7268e-16	0.48321	0.48321	0.367499	0.598921	2.15346e-13
UniRef90_A0A174CVG4	1262	0	0.776141	2.73169e-16	0.470868	0.470868	0.358109	0.583626	2.15414e-13
UniRef90_R5AFI9	1262	0	0.756997	2.73328e-16	0.470968	0.470968	0.358184	0.583751	2.15414e-13
UniRef90_A0A174C8F5	1262	0	0.691747	2.75362e-16	0.470898	0.470898	0.358119	0.583677	2.16392e-13
UniRef90_A5KKP5	1262	0	0.792984	2.74935e-16	0.470807	0.470807	0.358052	0.583561	2.16392e-13
UniRef90_E5XDT2	1262	0	0.76227	2.75368e-16	0.470842	0.470842	0.358077	0.583608	2.16392e-13
UniRef90_E5XDG2	1262	0	0.762633	2.79461e-16	0.470721	0.470721	0.35796	0.583482	2.19396e-13
UniRef90_A5KR82	1262	0	0.601741	2.79863e-16	0.470861	0.470861	0.358064	0.583658	2.19499e-13
UniRef90_E5XIN4	1262	0	0.921026	2.80809e-16	0.470499	0.470499	0.357784	0.583215	2.20029e-13
UniRef90_A5KMZ9	1262	0	0.879221	2.81194e-16	0.47058	0.47058	0.357842	0.583317	2.20118e-13
UniRef90_A0A174FAM7	1262	0	0.525627	2.82625e-16	0.470893	0.470893	0.358072	0.583714	2.21026e-13
UniRef90_A0A174EIE3	1262	0	0.85912	2.83859e-16	0.470514	0.470514	0.357777	0.583252	2.21777e-13
UniRef90_E5XDS2	1262	0	0.744778	2.85405e-16	0.470601	0.470601	0.357834	0.583368	2.22771e-13
UniRef90_A0A174DWB3	1262	1.35257	0.52514	2.89976e-16	0.476806	0.476806	0.362525	0.591086	2.26121e-13
UniRef90_E5XDF8	1262	0	0.783425	2.91614e-16	0.470405	0.470405	0.357649	0.583161	2.27181e-13
UniRef90_F5TDX1	1262	0	0.985872	2.93261e-16	0.470038	0.470038	0.357361	0.582716	2.28245e-13
UniRef90_E5XK26	1262	0	0.668409	2.95164e-16	0.470409	0.470409	0.357632	0.583186	2.29506e-13
UniRef90_E5XFQ5	1262	0	0.802502	2.99285e-16	0.470196	0.470196	0.357447	0.582945	2.32488e-13
UniRef90_A5KQ36	1262	0	0.714355	2.99756e-16	0.470285	0.470285	0.357512	0.583058	2.32631e-13
UniRef90_A0A174DVF4	1262	0	0.666525	3.011e-16	0.470313	0.470313	0.357526	0.5831	2.33452e-13
UniRef90_A5KM31	1262	0	0.883153	3.02179e-16	0.470028	0.470028	0.357303	0.582753	2.34065e-13
UniRef90_A0A174C8B9	1262	0	0.673612	3.03566e-16	0.470228	0.470228	0.357447	0.583008	2.34249e-13
UniRef90_A0A174CS88	1262	0	0.923138	3.03445e-16	0.469937	0.469937	0.357227	0.582646	2.34249e-13
UniRef90_A5KK07	1262	0.0207397	0.516899	3.0357e-16	0.470455	0.470455	0.35762	0.58329	2.34249e-13
UniRef90_A5KKQ8	1262	0	0.724139	3.03154e-16	0.470182	0.470182	0.357415	0.582949	2.34249e-13
UniRef90_R5ACE3	1262	0	0.684589	3.03913e-16	0.470297	0.470297	0.357498	0.583096	2.34291e-13
UniRef90_A0A173Y8D4	1262	0.0192563	0.503294	3.05903e-16	0.470415	0.470415	0.357577	0.583252	2.35602e-13
UniRef90_E5XFQ8	1262	0	0.582565	3.06512e-16	0.470236	0.470236	0.357438	0.583034	2.35848e-13
UniRef90_E5XIN3	1262	0	0.657948	3.07317e-16	0.470132	0.470132	0.357354	0.58291	2.36243e-13
UniRef90_E5XDY5	1262	0	0.519861	3.08991e-16	0.470241	0.470241	0.357428	0.583054	2.37305e-13
UniRef90_A0A174F5H4	1262	0	0.819256	3.09936e-16	0.469937	0.469937	0.357192	0.582682	2.37807e-13
UniRef90_E5XFH8	1262	0	0.792021	3.10699e-16	0.469953	0.469953	0.3572	0.582706	2.38167e-13
UniRef90_E5XIS4	1262	0.00320994	0.593734	3.13795e-16	0.470062	0.470062	0.357266	0.582858	2.40313e-13
UniRef90_A0A174DE25	1262	0	0.710702	3.14518e-16	0.469933	0.469933	0.357164	0.582701	2.40414e-13
UniRef90_A0A174DL29	1262	0	0.736823	3.1431e-16	0.469932	0.469932	0.357164	0.582699	2.40414e-13
UniRef90_A0A173YI07	1262	0	0.566301	3.16878e-16	0.470032	0.470032	0.357227	0.582837	2.41983e-13
UniRef90_A5KQW3	1262	0	0.650118	3.17166e-16	0.469927	0.469927	0.357146	0.582708	2.41983e-13
UniRef90_A0A174ET12	1262	0	0.615318	3.17779e-16	0.469948	0.469948	0.357159	0.582737	2.41983e-13
UniRef90_E5XDI1	1262	0	0.888128	3.17572e-16	0.469675	0.469675	0.356952	0.582398	2.41983e-13
UniRef90_E5XFT8	1262	0	0.701585	3.1806e-16	0.469873	0.469873	0.3571	0.582645	2.41983e-13
UniRef90_A5KNV6	1262	0	0.722721	3.20706e-16	0.469777	0.469777	0.357013	0.582541	2.43768e-13
UniRef90_A0A174FDA6	1262	0	0.553408	3.2156e-16	0.469954	0.469954	0.357143	0.582765	2.44189e-13
UniRef90_E5XIN9	1262	0	0.668692	3.22328e-16	0.469816	0.469816	0.357035	0.582597	2.44544e-13
UniRef90_A0A174A1T7	1262	0	0.669697	3.24611e-16	0.469757	0.469757	0.356978	0.582535	2.45817e-13
UniRef90_A5KLW1	1262	0	0.675851	3.24612e-16	0.469734	0.469734	0.356961	0.582508	2.45817e-13
UniRef90_A5KQY3	1262	0	0.724661	3.26298e-16	0.469673	0.469673	0.356906	0.582441	2.46864e-13
UniRef90_A0A173XEI2	1262	0	0.761295	3.28262e-16	0.469578	0.469578	0.356823	0.582332	2.48119e-13
UniRef90_A5KN01	1262	0	0.521024	3.29484e-16	0.469825	0.469825	0.357005	0.582646	2.48811e-13
UniRef90_E5XF48	1262	0	0.765184	3.31637e-16	0.46949	0.46949	0.35674	0.582241	2.50205e-13
UniRef90_A5KQD0	1262	0	0.71308	3.32891e-16	0.469529	0.469529	0.356762	0.582295	2.50685e-13
UniRef90_A5KR46	1262	0	0.834459	3.32716e-16	0.469387	0.469387	0.356656	0.582119	2.50685e-13
UniRef90_A0A173Z163	1262	0.00227829	0.353477	3.33484e-16	0.469883	0.469883	0.357029	0.582737	2.50899e-13
UniRef90_E5XJ27	1262	0	0.634727	3.34167e-16	0.469566	0.469566	0.356785	0.582348	2.5118e-13
UniRef90_A5KNL2	1262	0	0.917524	3.35776e-16	0.469215	0.469215	0.35651	0.581921	2.52156e-13
UniRef90_E5XIU7	1262	0	0.697169	3.36136e-16	0.469483	0.469483	0.356712	0.582255	2.52194e-13
UniRef90_A5KQU5	1262	0	0.589712	3.36816e-16	0.469564	0.469564	0.35677	0.582358	2.52205e-13
UniRef90_A8SIQ4	1262	0	0.956575	3.37392e-16	0.469169	0.469169	0.356467	0.581872	2.52205e-13
UniRef90_E5XJJ7	1262	0	0.614747	3.37328e-16	0.469519	0.469519	0.356733	0.582304	2.52205e-13
UniRef90_E5XJW5	1262	0.0138358	0.375695	3.37058e-16	0.46983	0.46983	0.356971	0.58269	2.52205e-13
UniRef90_E5XG71	1262	0.00370785	0.576856	3.37908e-16	0.469559	0.469559	0.35676	0.582357	2.52358e-13
UniRef90_E5XE57	1262	0.00528408	0.42935	3.3871e-16	0.469705	0.469705	0.356867	0.582542	2.52724e-13
UniRef90_E5XED2	1262	0.00864077	0.493052	3.40587e-16	0.46961	0.46961	0.356786	0.582434	2.53892e-13
UniRef90_A0A173YZ50	1262	0	0.680834	3.42901e-16	0.469346	0.469346	0.356574	0.582118	2.55383e-13
UniRef90_E5XK29	1262	0	0.663755	3.44504e-16	0.469338	0.469338	0.35656	0.582116	2.56342e-13
UniRef90_A0A143XGG6	1262	0	0.638229	3.45596e-16	0.469324	0.469324	0.356544	0.582103	2.56731e-13
UniRef90_A5KMH0	1262	0	0.519433	3.45885e-16	0.469441	0.469441	0.356632	0.58225	2.56731e-13
UniRef90_A5KPX4	1262	0	0.781561	3.45976e-16	0.469186	0.469186	0.356438	0.581934	2.56731e-13
UniRef90_A0A173XD77	1262	0	0.742877	3.46782e-16	0.469194	0.469194	0.35644	0.581948	2.57095e-13
UniRef90_A0A174A058	1262	0	0.581663	3.48152e-16	0.469334	0.469334	0.356539	0.582128	2.57804e-13
UniRef90_A5KQK8	1262	0	0.737817	3.48373e-16	0.469189	0.469189	0.356429	0.58195	2.57804e-13
UniRef90_A0A135YPA2	1262	0	0.745415	3.48778e-16	0.469194	0.469194	0.35643	0.581957	2.57869e-13
UniRef90_A0A174DWT1	1262	0	0.583465	3.523e-16	0.46924	0.46924	0.356449	0.582032	2.60075e-13
UniRef90_A5KR38	1262	0	0.836243	3.52402e-16	0.469009	0.469009	0.356272	0.581745	2.60075e-13
UniRef90_A0A174BIS6	1262	0.00121729	0.386694	3.56069e-16	0.469379	0.469379	0.356537	0.582222	2.6246e-13
UniRef90_A0A174BLI7	1262	0.0188026	0.392763	3.56279e-16	0.469443	0.469443	0.356584	0.582302	2.6246e-13
UniRef90_A0A174C743	1262	0	0.59337	3.58059e-16	0.469113	0.469113	0.356325	0.581901	2.63532e-13
UniRef90_E5XKF6	1262	0	0.873311	3.58609e-16	0.468836	0.468836	0.356112	0.58156	2.63698e-13
UniRef90_E5XGM0	1262	0	0.952253	3.59778e-16	0.468688	0.468688	0.355994	0.581381	2.64318e-13
UniRef90_A0A173XKK5	1262	0	0.664452	3.60564e-16	0.469004	0.469004	0.35623	0.581777	2.64417e-13
UniRef90_E5XHX6	1262	0.00673016	0.551522	3.60311e-16	0.469141	0.469141	0.356335	0.581946	2.64417e-13
UniRef90_E5XGP0	1262	0	0.835124	3.61309e-16	0.468813	0.468813	0.356082	0.581544	2.64725e-13
UniRef90_A0A174BHG0	1262	0	0.575956	3.62022e-16	0.46906	0.46906	0.356266	0.581854	2.64826e-13
UniRef90_A5KQV4	1262	0	0.948948	3.62098e-16	0.468627	0.468627	0.355937	0.581317	2.64826e-13
UniRef90_E5XJK0	1262	0	0.776604	3.62481e-16	0.468853	0.468853	0.356107	0.5816	2.64867e-13
UniRef90_E5XD75	1262	0	0.654947	3.63225e-16	0.468955	0.468955	0.356181	0.581729	2.65172e-13
UniRef90_E5XED6	1262	0	0.873066	3.64176e-16	0.468682	0.468682	0.355969	0.581395	2.65628e-13
UniRef90_A0A174A0W5	1262	0	0.536329	3.65915e-16	0.469024	0.469024	0.356221	0.581827	2.66537e-13
UniRef90_E5XDX9	1262	0	0.618038	3.66407e-16	0.468934	0.468934	0.35615	0.581717	2.66537e-13
UniRef90_E5XIN5	1262	0	0.899304	3.66235e-16	0.468648	0.468648	0.355934	0.581362	2.66537e-13
UniRef90_A5KPE7	1262	0	0.904865	3.69251e-16	0.468565	0.468565	0.355857	0.581273	2.68366e-13
UniRef90_A0A173XMM8	1262	0	0.691194	3.7133e-16	0.468768	0.468768	0.356002	0.581534	2.69636e-13
UniRef90_A5KIK3	1262	0	0.716269	3.71925e-16	0.468735	0.468735	0.355974	0.581496	2.69827e-13
UniRef90_A0A174CP53	1262	0.665496	0.401882	3.75812e-16	0.471965	0.471965	0.35841	0.58552	2.72403e-13
UniRef90_A5KLX2	1262	0	0.677871	3.77752e-16	0.468656	0.468656	0.355888	0.581424	2.73565e-13
UniRef90_A0A173ZA26	1262	0.000555361	0.431259	3.79741e-16	0.468871	0.468871	0.356043	0.5817	2.74273e-13
UniRef90_A5KKS7	1262	0	0.777048	3.79561e-16	0.468528	0.468528	0.355783	0.581273	2.74273e-13
UniRef90_E5XE33	1262	0	0.647331	3.79198e-16	0.468664	0.468664	0.355888	0.581441	2.74273e-13
UniRef90_E5XIZ8	1262	0	0.540222	3.82806e-16	0.468698	0.468698	0.355898	0.581499	2.7624e-13
UniRef90_A0A174ELB9	1262	0	0.66046	3.8328e-16	0.468587	0.468587	0.355811	0.581363	2.76337e-13
UniRef90_E5XF09	1262	0	0.791812	3.83889e-16	0.468412	0.468412	0.355676	0.581148	2.76531e-13
UniRef90_A0A174D3A0	1262	0	0.750473	3.84788e-16	0.468454	0.468454	0.355704	0.581204	2.76933e-13
UniRef90_A0A174E027	1262	0	0.79267	3.861e-16	0.468388	0.468388	0.355648	0.581128	2.77632e-13
UniRef90_E5XIQ1	1262	0	0.70705	3.86955e-16	0.468461	0.468461	0.3557	0.581222	2.78e-13
UniRef90_A5KJG7	1262	0	0.906978	3.88841e-16	0.468184	0.468184	0.355481	0.580887	2.79109e-13
UniRef90_E5XDJ6	1262	0	0.822184	3.8933e-16	0.468288	0.468288	0.355559	0.581018	2.79213e-13
UniRef90_A0A173Z8Z4	1262	0.0132172	0.488988	3.9003e-16	0.468671	0.468671	0.355846	0.581495	2.79468e-13
UniRef90_E5XKA8	1262	0	0.697837	3.90633e-16	0.468408	0.468408	0.355644	0.581173	2.79654e-13
UniRef90_A0A0D8IXK2	1262	0.00138104	0.297016	3.91756e-16	0.468872	0.468872	0.355991	0.581752	2.79964e-13
UniRef90_A0A173YTV4	1262	0	0.883524	3.91566e-16	0.468188	0.468188	0.355473	0.580903	2.79964e-13
UniRef90_A0A174AY04	1262	0	0.799319	3.94003e-16	0.46823	0.46823	0.355494	0.580965	2.81322e-13
UniRef90_A0A174E7R3	1262	0	0.577035	3.94387e-16	0.468453	0.468453	0.355662	0.581244	2.81349e-13
UniRef90_A0A173YL28	1262	0	0.605389	3.95013e-16	0.468407	0.468407	0.355624	0.58119	2.81549e-13
UniRef90_X8K6F6	1202	0	0.869679	3.96342e-16	0.480089	0.480089	0.364488	0.595691	2.82248e-13
UniRef90_E5XG32	1262	0.427978	0.420845	3.99713e-16	0.470442	0.470442	0.357149	0.583735	2.844e-13
UniRef90_A0A174DD26	1262	0	0.715412	4.00721e-16	0.468202	0.468202	0.355445	0.58096	2.84868e-13
UniRef90_E5XH30	1262	0	0.561194	4.04247e-16	0.468291	0.468291	0.355498	0.581085	2.86872e-13
UniRef90_E5XHN1	1262	0	0.674532	4.03973e-16	0.468186	0.468186	0.355419	0.580954	2.86872e-13
UniRef90_A0A173Z2X6	1262	0	0.622438	4.0485e-16	0.468195	0.468195	0.355422	0.580968	2.87049e-13
UniRef90_E5XJH8	1262	0	0.741605	4.05962e-16	0.468083	0.468083	0.355332	0.580833	2.87587e-13
UniRef90_E5XHD5	1262	0.201183	0.684769	4.06556e-16	0.469064	0.469064	0.356075	0.582053	2.87677e-13
UniRef90_F3AXW6	1262	0	0.532643	4.06797e-16	0.468253	0.468253	0.355458	0.581047	2.87677e-13
UniRef90_E5XDL3	1262	0	0.630357	4.07169e-16	0.46816	0.46816	0.355386	0.580934	2.87689e-13
UniRef90_E5XHD9	1262	0	0.920682	4.07918e-16	0.467835	0.467835	0.355136	0.580533	2.87719e-13
UniRef90_E5XHT1	1262	0	0.921085	4.07734e-16	0.467844	0.467844	0.355144	0.580544	2.87719e-13
UniRef90_E5XJM5	1262	0	0.663201	4.09216e-16	0.468098	0.468098	0.35533	0.580865	2.88384e-13
UniRef90_A0A174EH77	1262	0	0.821769	4.09868e-16	0.467939	0.467939	0.355207	0.58067	2.88562e-13
UniRef90_E5XD97	1262	0	0.615816	4.1018e-16	0.468137	0.468137	0.355356	0.580918	2.88562e-13
UniRef90_E5XJ63	1262	0	0.762016	4.11583e-16	0.467961	0.467961	0.355217	0.580706	2.89299e-13
UniRef90_A0A173ZKA2	1262	0	0.696193	4.18223e-16	0.467901	0.467901	0.355144	0.580658	2.93712e-13
UniRef90_E5XIZ5	1262	0.00921881	0.451145	4.20007e-16	0.468144	0.468144	0.355322	0.580967	2.9471e-13
UniRef90_E5XJ77	1262	0	0.654837	4.20919e-16	0.467921	0.467921	0.355149	0.580694	2.95095e-13
UniRef90_E5XIX9	1262	0	0.531892	4.21371e-16	0.468025	0.468025	0.355226	0.580825	2.95158e-13
UniRef90_A0A173ZVM0	1262	0	0.926513	4.24043e-16	0.467553	0.467553	0.354857	0.580249	2.96518e-13
UniRef90_E5XE45	1262	0	0.597263	4.24004e-16	0.467907	0.467907	0.355126	0.580688	2.96518e-13
UniRef90_E5XFL9	1262	0	0.829741	4.25217e-16	0.467655	0.467655	0.35493	0.58038	2.97083e-13
UniRef90_A5KLX7	1262	0	0.869148	4.27351e-16	0.467561	0.467561	0.35485	0.580272	2.98318e-13
UniRef90_A0A174D1S0	1262	0	0.685245	4.30162e-16	0.467723	0.467723	0.354962	0.580485	2.99906e-13
UniRef90_E5XIM0	1262	0	0.638479	4.30365e-16	0.467751	0.467751	0.354983	0.58052	2.99906e-13
UniRef90_E5XGZ6	1262	0	0.688473	4.32322e-16	0.46767	0.46767	0.354913	0.580427	3.01012e-13
UniRef90_E5XF92	1262	0.00778124	0.547543	4.33142e-16	0.467824	0.467824	0.355027	0.580621	3.01325e-13
UniRef90_E5XK42	1262	0	0.780434	4.35269e-16	0.467542	0.467542	0.354805	0.58028	3.02546e-13
UniRef90_E5XD93	1262	0	0.790991	4.38426e-16	0.467487	0.467487	0.354751	0.580223	3.04479e-13
UniRef90_A5KQX3	1262	0	0.648917	4.41579e-16	0.467578	0.467578	0.354808	0.580348	3.06407e-13
UniRef90_A5KQ38	1262	0	0.667357	4.42574e-16	0.46755	0.46755	0.354783	0.580318	3.06835e-13
UniRef90_A0A173Z4J4	1262	0	0.727416	4.4581e-16	0.467415	0.467415	0.354668	0.580162	3.07766e-13
UniRef90_A0A174ABN2	1262	0	0.669007	4.45105e-16	0.467488	0.467488	0.354726	0.58025	3.07766e-13
UniRef90_A0A174C2M1	1262	0	0.702366	4.45594e-16	0.467442	0.467442	0.354689	0.580195	3.07766e-13
UniRef90_A0A174DM32	1262	0	0.509286	4.45371e-16	0.467641	0.467641	0.354841	0.580441	3.07766e-13
UniRef90_A5KMC9	1262	0	0.733751	4.45407e-16	0.467439	0.467439	0.354688	0.580191	3.07766e-13
UniRef90_A0A173Z5Q6	1262	0	0.726667	4.4946e-16	0.467377	0.467377	0.354625	0.580128	3.10022e-13
UniRef90_A5KQK6	1262	0	0.772174	4.5068e-16	0.46725	0.46725	0.354525	0.579975	3.106e-13
UniRef90_E5XJK1	1262	0.000473309	0.476616	4.52036e-16	0.467575	0.467575	0.354766	0.580384	3.11271e-13
UniRef90_A5KPN3	1262	0	0.718763	4.52694e-16	0.46733	0.46733	0.354578	0.580083	3.1146e-13
UniRef90_A0A174DI86	1262	0	0.87625	4.54239e-16	0.467125	0.467125	0.354416	0.579833	3.12258e-13
UniRef90_A0A173ZEZ4	1262	0	0.621342	4.56801e-16	0.467354	0.467354	0.354581	0.580128	3.13754e-13
UniRef90_A0A174FL71	1262	0	0.561014	4.59075e-16	0.467356	0.467356	0.354574	0.580138	3.14784e-13
UniRef90_E5XK92	1262	0	0.677953	4.587e-16	0.467262	0.467262	0.354504	0.58002	3.14784e-13
UniRef90_A0A173ZCI1	1262	0	0.777537	4.60613e-16	0.467148	0.467148	0.354411	0.579886	3.15109e-13
UniRef90_A5KMK2	1262	0	0.681984	4.60264e-16	0.467239	0.467239	0.354481	0.579997	3.15109e-13
UniRef90_E5XE22	1262	0.017005	0.540529	4.60712e-16	0.467434	0.467434	0.354627	0.580241	3.15109e-13
UniRef90_E5XEX3	1262	0	0.681262	4.63567e-16	0.467184	0.467184	0.354427	0.579941	3.16795e-13
UniRef90_A0A174A903	1262	0	0.622339	4.66273e-16	0.467202	0.467202	0.354431	0.579974	3.18109e-13
UniRef90_A0A174DP06	1262	0	0.532048	4.66129e-16	0.467293	0.467293	0.3545	0.580085	3.18109e-13
UniRef90_A0A173ZQF5	1262	0	0.958909	4.71809e-16	0.466754	0.466754	0.354071	0.579437	3.21454e-13
UniRef90_E5XH13	1262	0	0.654642	4.71967e-16	0.467082	0.467082	0.35432	0.579845	3.21454e-13
UniRef90_E5XJ72	1262	0	0.826408	4.73181e-16	0.466905	0.466905	0.354181	0.579629	3.22011e-13
UniRef90_A5KQK0	1262	0	0.80157	4.75096e-16	0.466891	0.466891	0.354163	0.579618	3.23044e-13
UniRef90_A0A0D8IXJ7	1262	0	0.687219	4.7633e-16	0.467037	0.467037	0.354269	0.579804	3.23612e-13
UniRef90_A0A173ZD72	1262	0	0.752034	4.77747e-16	0.466913	0.466913	0.354171	0.579655	3.24303e-13
UniRef90_A5KKR3	1262	0	0.916208	4.79865e-16	0.466673	0.466673	0.353981	0.579364	3.25469e-13
UniRef90_E5XHU4	1262	0	0.632962	4.80934e-16	0.46696	0.46696	0.354195	0.579725	3.25922e-13
UniRef90_A0A174CFN2	1262	0	0.797528	4.83434e-16	0.466792	0.466792	0.354059	0.579525	3.27343e-13
UniRef90_A5KPJ3	1262	0	0.745935	4.84452e-16	0.4668	0.4668	0.354061	0.579538	3.2776e-13
UniRef90_A5KJF5	1262	0	0.598626	4.85638e-16	0.466927	0.466927	0.354154	0.579701	3.28288e-13
UniRef90_E5XDP6	1262	0	0.600224	4.87001e-16	0.466914	0.466914	0.354139	0.579689	3.28936e-13
UniRef90_A0A174CG85	1262	0	0.836407	4.9053e-16	0.466612	0.466612	0.353898	0.579326	3.30948e-13
UniRef90_E5XFH9	1262	0	0.90161	4.90794e-16	0.466541	0.466541	0.353843	0.579239	3.30948e-13
UniRef90_A0A174A466	1262	0	0.786906	4.93548e-16	0.466622	0.466622	0.353895	0.579349	3.31979e-13
UniRef90_E5XEH3	1262	0	0.639927	4.93317e-16	0.466781	0.466781	0.354017	0.579546	3.31979e-13
UniRef90_E5XJM6	1262	0	0.522308	4.9324e-16	0.466898	0.466898	0.354106	0.579691	3.31979e-13
UniRef90_A0A173YL88	1262	0	0.600332	4.94719e-16	0.466793	0.466793	0.35402	0.579565	3.32491e-13
UniRef90_F3AYR0	1262	0	0.856937	4.97794e-16	0.46651	0.46651	0.353795	0.579224	3.34281e-13
UniRef90_A5KLN6	1262	0	0.629029	4.99451e-16	0.466708	0.466708	0.35394	0.579476	3.35117e-13
UniRef90_A5KQ99	1262	2.55353	0.401629	5.02401e-16	0.478247	0.478247	0.362681	0.593814	3.36818e-13
UniRef90_E5XGN7	1262	0	0.511795	5.04473e-16	0.466728	0.466728	0.353939	0.579518	3.37928e-13
UniRef90_A5KIH6	1262	0	0.578796	5.05281e-16	0.466673	0.466673	0.353894	0.579452	3.38144e-13
UniRef90_E5XDZ9	1262	0	0.654208	5.05628e-16	0.466601	0.466601	0.353839	0.579364	3.38144e-13
UniRef90_E5XGX2	1262	0	0.704579	5.06312e-16	0.466528	0.466528	0.35378	0.579275	3.38323e-13
UniRef90_A0A174DJS7	1262	0	0.708561	5.08408e-16	0.466503	0.466503	0.353755	0.579252	3.39445e-13
UniRef90_A5KMG8	1262	0	0.767296	5.09169e-16	0.466413	0.466413	0.353684	0.579142	3.39674e-13
UniRef90_A0A174EB96	1262	0	0.686687	5.0997e-16	0.466495	0.466495	0.353743	0.579246	3.39929e-13
UniRef90_A0A174CZW9	1262	0	0.730024	5.12009e-16	0.466424	0.466424	0.353683	0.579165	3.41008e-13
UniRef90_A5KMP2	1262	0	0.587045	5.14219e-16	0.466579	0.466579	0.353793	0.579364	3.4192e-13
UniRef90_E5XKA9	1262	0	0.776635	5.13961e-16	0.466342	0.466342	0.353614	0.57907	3.4192e-13
UniRef90_A0A174ELQ7	1262	0	0.636324	5.16008e-16	0.466451	0.466451	0.35369	0.579211	3.42829e-13
UniRef90_A0A173XKQ4	1262	0	0.812798	5.20214e-16	0.466242	0.466242	0.353518	0.578966	3.45341e-13
UniRef90_E5XE50	1262	0	0.891094	5.23669e-16	0.466083	0.466083	0.353386	0.57878	3.47276e-13
UniRef90_UPI0006891D46	1262	0	0.711328	5.23984e-16	0.466335	0.466335	0.353576	0.579094	3.47276e-13
UniRef90_E5XGZ9	1262	0	0.857557	5.24997e-16	0.466113	0.466113	0.353405	0.578822	3.47664e-13
UniRef90_A5KPR7	1262	0	0.773931	5.29483e-16	0.466148	0.466148	0.353417	0.578879	3.49795e-13
UniRef90_A5KR64	1262	0	0.573191	5.29506e-16	0.466343	0.466343	0.353565	0.579121	3.49795e-13
UniRef90_E5XEL8	1262	0	0.626012	5.29257e-16	0.466293	0.466293	0.353527	0.579058	3.49795e-13
UniRef90_R5QBY9	1262	0	0.738357	5.34309e-16	0.466114	0.466114	0.353375	0.578852	3.52681e-13
UniRef90_A5KML0	1262	0	0.85465	5.35787e-16	0.465969	0.465969	0.353261	0.578676	3.53349e-13
UniRef90_E5XE28	1262	0.00707272	0.387527	5.36626e-16	0.466451	0.466451	0.353624	0.579278	3.53349e-13
UniRef90_E5XFT5	1262	0	0.856668	5.3654e-16	0.465948	0.465948	0.353243	0.578654	3.53349e-13
UniRef90_E5XFA7	1262	0	0.740169	5.38261e-16	0.466066	0.466066	0.353327	0.578805	3.54139e-13
UniRef90_A0A2T0G4Y7	1202	0	0.498385	5.39701e-16	0.47821	0.47821	0.362529	0.593891	3.54225e-13
UniRef90_A0A355NPT3	1262	0	0.660439	5.39416e-16	0.466119	0.466119	0.353364	0.578875	3.54225e-13
UniRef90_E5XID2	1262	0	0.729764	5.3942e-16	0.466049	0.466049	0.353311	0.578788	3.54225e-13
UniRef90_E5XK56	1262	0	0.848024	5.41735e-16	0.465896	0.465896	0.353187	0.578605	3.55274e-13
UniRef90_A0A174DLG4	1262	0	0.640034	5.43158e-16	0.466075	0.466075	0.353318	0.578831	3.55701e-13
UniRef90_E5XJX7	1262	0	0.603722	5.43263e-16	0.466133	0.466133	0.353362	0.578904	3.55701e-13
UniRef90_E5XIX7	1262	0	0.862173	5.46141e-16	0.465825	0.465825	0.353119	0.57853	3.57298e-13
UniRef90_E5XEZ6	1262	0	0.71332	5.48059e-16	0.465962	0.465962	0.353217	0.578706	3.58265e-13
UniRef90_A0A173YPP6	1262	0	0.795171	5.52275e-16	0.465821	0.465821	0.353098	0.578544	3.6073e-13
UniRef90_E5XEW8	1262	0	0.861471	5.54959e-16	0.465728	0.465728	0.353019	0.578437	3.62192e-13
UniRef90_F3AVC3	1262	0	0.69498	5.56577e-16	0.465874	0.465874	0.353125	0.578624	3.62957e-13
UniRef90_A0A173YGS1	1262	0	0.533553	5.60256e-16	0.465961	0.465961	0.353179	0.578742	3.65063e-13
UniRef90_A0A174CEX3	1262	0	0.699782	5.60874e-16	0.465808	0.465808	0.353062	0.578555	3.65173e-13
UniRef90_A0A174CUA2	1262	0	0.724573	5.61331e-16	0.465762	0.465762	0.353026	0.578499	3.65178e-13
UniRef90_E5XHN6	1262	0	0.610841	5.64713e-16	0.465833	0.465833	0.353069	0.578597	3.67084e-13
UniRef90_E5XF10	1262	0	0.654581	5.65669e-16	0.465773	0.465773	0.353021	0.578525	3.67149e-13
UniRef90_E7MN29	1202	0	0.997862	5.65877e-16	0.477183	0.477183	0.361668	0.592698	3.67149e-13
UniRef90_G9RX60	1262	3.14651e-05	0.418071	5.66169e-16	0.466083	0.466083	0.353254	0.578912	3.67149e-13
UniRef90_A0A173ZAV6	1262	0	0.750833	5.67271e-16	0.465668	0.465668	0.352936	0.578399	3.6757e-13
UniRef90_E5XJM7	1262	0	0.815863	5.69337e-16	0.465573	0.465573	0.352858	0.578287	3.68615e-13
UniRef90_E5XE55	1262	0	0.613244	5.71185e-16	0.465759	0.465759	0.352994	0.578524	3.69517e-13
UniRef90_E5XDL1	1262	0	0.773324	5.71816e-16	0.465581	0.465581	0.352857	0.578305	3.69631e-13
UniRef90_E5XEP7	1262	0	0.728221	5.75369e-16	0.465572	0.465572	0.35284	0.578305	3.71632e-13
UniRef90_A0A174C2B6	1262	0	0.648859	5.77222e-16	0.465639	0.465639	0.352885	0.578393	3.72533e-13
UniRef90_E5XII2	1262	0	0.690832	5.78732e-16	0.465598	0.465598	0.352849	0.578346	3.73211e-13
UniRef90_E5XF63	1262	0	0.752017	5.79215e-16	0.465503	0.465503	0.352776	0.578231	3.73227e-13
UniRef90_E5XF41	1262	0	0.775678	5.85384e-16	0.465412	0.465412	0.352689	0.578135	3.76902e-13
UniRef90_E5XKC9	1262	0	0.77165	5.86739e-16	0.465401	0.465401	0.352677	0.578126	3.77476e-13
UniRef90_E5XG79	1262	0	0.625103	5.88749e-16	0.465518	0.465518	0.352759	0.578276	3.7847e-13
UniRef90_A5KLM2	1262	0	0.60355	5.89767e-16	0.465521	0.465521	0.352759	0.578283	3.78824e-13
UniRef90_E5XHL1	1262	0	0.660028	5.91606e-16	0.465463	0.465463	0.35271	0.578217	3.79705e-13
UniRef90_A5KQR1	1262	0	0.783592	5.94101e-16	0.465275	0.465275	0.35256	0.577989	3.81006e-13
UniRef90_A5KNZ9	1262	0	0.769959	6.01304e-16	0.465217	0.465217	0.352496	0.577938	3.85321e-13
UniRef90_E5XEM5	1262	0.00381599	0.370116	6.0194e-16	0.465633	0.465633	0.352809	0.578457	3.85424e-13
UniRef90_E5XDF0	1262	0	0.653073	6.02553e-16	0.465347	0.465347	0.352591	0.578103	3.85513e-13
UniRef90_A5KMR8	1262	0	0.670667	6.05025e-16	0.465293	0.465293	0.352542	0.578043	3.8679e-13
UniRef90_R5QF81	1262	0	0.786032	6.06182e-16	0.465168	0.465168	0.352445	0.577891	3.87225e-13
UniRef90_A0A173Y8V1	1262	0	0.868002	6.11798e-16	0.465007	0.465007	0.352307	0.577707	3.89673e-13
UniRef90_A0A173Z8E9	1262	0.011346	0.407304	6.11622e-16	0.465498	0.465498	0.352679	0.578316	3.89673e-13
UniRef90_A0A173ZR00	1262	0	0.656329	6.10548e-16	0.465229	0.465229	0.352479	0.577979	3.89673e-13
UniRef90_E5XE43	1262	0	0.59081	6.11932e-16	0.465272	0.465272	0.352508	0.578037	3.89673e-13
UniRef90_A5KLV2	1262	0	0.634743	6.14709e-16	0.465202	0.465202	0.352447	0.577957	3.90941e-13
UniRef90_A5KPY1	1262	0	0.810541	6.14886e-16	0.465026	0.465026	0.352313	0.577738	3.90941e-13
UniRef90_E5XFH5	1262	0	0.663667	6.15449e-16	0.46516	0.46516	0.352413	0.577907	3.90993e-13
UniRef90_E5XI84	1262	0	0.750776	6.16936e-16	0.465071	0.465071	0.352341	0.5778	3.91631e-13
UniRef90_F3AWT4	1262	0	0.612611	6.18627e-16	0.465184	0.465184	0.352422	0.577945	3.92399e-13
UniRef90_E5XGL4	1262	0	0.907636	6.20467e-16	0.464879	0.464879	0.352186	0.577572	3.93258e-13
UniRef90_A5KNW4	1262	0	0.829913	6.21126e-16	0.464937	0.464937	0.352229	0.577646	3.93369e-13
UniRef90_A0A174DHT2	1262	0	0.790198	6.22627e-16	0.464978	0.464978	0.352255	0.5777	3.94008e-13
UniRef90_E5XH03	1262	0	0.953837	6.23105e-16	0.464742	0.464742	0.352075	0.577408	3.94008e-13
UniRef90_A5KPD9	1262	0	0.64176	6.27499e-16	0.465037	0.465037	0.352287	0.577787	3.96478e-13
UniRef90_E5XDJ2	1262	0	0.739469	6.29846e-16	0.464902	0.464902	0.352178	0.577626	3.97652e-13
UniRef90_A0A174B0I7	1262	0	0.530754	6.33365e-16	0.46508	0.46508	0.352304	0.577857	3.99563e-13
UniRef90_A0A174CJT4	1262	0.00045737	0.450415	6.34502e-16	0.465163	0.465163	0.352363	0.577963	3.9997e-13
UniRef90_A0A173ZYQ7	1262	0	0.588756	6.41699e-16	0.464929	0.464929	0.352167	0.577692	4.04193e-13
UniRef90_A0A173ZTP2	1262	0	0.57842	6.43548e-16	0.46493	0.46493	0.352163	0.577697	4.04428e-13
UniRef90_E5XDQ2	1262	0	0.728688	6.42571e-16	0.464788	0.464788	0.352058	0.577518	4.04428e-13
UniRef90_E5XDR9	1262	0	0.833586	6.44063e-16	0.464694	0.464694	0.351983	0.577406	4.04428e-13
UniRef90_E5XIZ9	1262	0	0.75361	6.44009e-16	0.464735	0.464735	0.352014	0.577455	4.04428e-13
UniRef90_E5XDC6	1262	0	0.687218	6.4701e-16	0.464783	0.464783	0.352042	0.577524	4.05965e-13
UniRef90_A0A173YUB9	1262	0	0.748816	6.55994e-16	0.464635	0.464635	0.351907	0.577364	4.11284e-13
UniRef90_F3AYR9	1262	0.00863951	0.371616	6.5763e-16	0.465013	0.465013	0.352189	0.577838	4.11992e-13
UniRef90_E5XHT4	1262	0	0.667652	6.7044e-16	0.46455	0.46455	0.351806	0.577295	4.19694e-13
UniRef90_A5KQ01	1262	0	0.599338	6.73807e-16	0.464566	0.464566	0.351809	0.577322	4.21477e-13
UniRef90_A0A174A6L0	1262	0	0.599257	6.77175e-16	0.464544	0.464544	0.351784	0.577304	4.23258e-13
UniRef90_E5XFR0	1262	0	0.648496	6.79283e-16	0.46448	0.46448	0.35173	0.57723	4.23677e-13
UniRef90_E5XG88	1262	0	0.768628	6.78524e-16	0.464373	0.464373	0.351651	0.577095	4.23677e-13
UniRef90_F0Z1Y0	1262	0	0.543402	6.7941e-16	0.464549	0.464549	0.351782	0.577316	4.23677e-13
UniRef90_A0A174CI06	1262	0	0.548174	6.8135e-16	0.464526	0.464526	0.35176	0.577292	4.24561e-13
UniRef90_A5KPY4	1262	0	0.721581	6.84926e-16	0.464335	0.464335	0.351606	0.577063	4.26462e-13
UniRef90_A0A174B6Y2	1262	0	0.676362	6.86323e-16	0.464379	0.464379	0.351636	0.577122	4.27005e-13
UniRef90_A5KQY2	1262	0	0.778868	6.87109e-16	0.464279	0.464279	0.351559	0.577	4.27167e-13
UniRef90_A5KQL6	1262	0	0.784621	6.89148e-16	0.464226	0.464226	0.351513	0.576939	4.2778e-13
UniRef90_E5XHR9	1262	0	0.851499	6.88899e-16	0.46418	0.46418	0.351479	0.576881	4.2778e-13
UniRef90_A0A173YU28	1262	0	0.585944	6.90163e-16	0.464423	0.464423	0.35166	0.577186	4.28083e-13
UniRef90_E5XFI1	1262	0	0.694375	6.91397e-16	0.464311	0.464311	0.351572	0.57705	4.28313e-13
UniRef90_E5XGM2	1262	0	0.687889	6.91665e-16	0.464304	0.464304	0.351566	0.577042	4.28313e-13
UniRef90_E5XJH4	1262	0	0.620366	6.92116e-16	0.464348	0.464348	0.351598	0.577098	4.28313e-13
UniRef90_E5XFA5	1262	0	0.759538	6.93631e-16	0.464207	0.464207	0.351488	0.576926	4.28924e-13
UniRef90_A0A174CPZ4	1262	0	0.589381	6.97157e-16	0.46434	0.46434	0.35158	0.5771	4.30499e-13
UniRef90_E5XDH5	1262	0	0.518523	6.97767e-16	0.4644	0.4644	0.351624	0.577176	4.30499e-13
UniRef90_E5XFL2	1262	0	0.70896	6.97667e-16	0.46422	0.46422	0.351488	0.576952	4.30499e-13
UniRef90_E5XHZ5	1262	0	0.627229	6.99411e-16	0.464263	0.464263	0.351516	0.577011	4.31186e-13
UniRef90_A0A173XS01	1262	0	0.690643	7.00893e-16	0.464215	0.464215	0.351476	0.576954	4.31772e-13
UniRef90_E5XIT1	1262	0	0.71542	7.04444e-16	0.464143	0.464143	0.351413	0.576874	4.33631e-13
UniRef90_E5XDM9	1262	0.000563164	0.453433	7.05435e-16	0.464392	0.464392	0.351599	0.577185	4.33912e-13
UniRef90_A0A173Z556	1262	0	0.598175	7.10729e-16	0.464196	0.464196	0.351438	0.576954	4.36508e-13
UniRef90_A5KPU3	1262	0.0191349	0.351398	7.10338e-16	0.464522	0.464522	0.351686	0.577359	4.36508e-13
UniRef90_A0A174EC47	1262	0	0.870938	7.25492e-16	0.463771	0.463771	0.351081	0.576461	4.45238e-13
UniRef90_A0A173Y592	1262	0	0.779985	7.27429e-16	0.463849	0.463849	0.351135	0.576562	4.45364e-13
UniRef90_A0A173YPT8	1262	0	0.592614	7.2703e-16	0.464038	0.464038	0.351279	0.576796	4.45364e-13
UniRef90_A0A173YXL5	1262	0	0.792912	7.27466e-16	0.463841	0.463841	0.351129	0.576552	4.45364e-13
UniRef90_E5XJ65	1262	0	0.66964	7.2789e-16	0.46396	0.46396	0.351218	0.576701	4.45364e-13
UniRef90_E5XEW1	1262	0	0.652215	7.28954e-16	0.463965	0.463965	0.35122	0.57671	4.45679e-13
UniRef90_A5KQ05	1262	0	0.923172	7.30743e-16	0.463637	0.463637	0.350968	0.576307	4.46437e-13
UniRef90_A0A173Z9S1	1262	0	0.635659	7.32421e-16	0.463935	0.463935	0.351189	0.576681	4.47126e-13
UniRef90_E5XGM7	1262	0	0.696455	7.34758e-16	0.463829	0.463829	0.351103	0.576555	4.48216e-13
UniRef90_A5KN10	1262	0	0.677625	7.37081e-16	0.463847	0.463847	0.351111	0.576582	4.49296e-13
UniRef90_A0A173XEF4	1262	0	0.886777	7.40898e-16	0.463588	0.463588	0.350907	0.57627	4.50609e-13
UniRef90_A0A174C840	1262	0	0.809884	7.40052e-16	0.463687	0.463687	0.350983	0.57639	4.50609e-13
UniRef90_E5XHX2	1262	0	0.671171	7.40451e-16	0.463821	0.463821	0.351084	0.576558	4.50609e-13
UniRef90_E5XET8	1262	0	0.834335	7.45261e-16	0.463621	0.463621	0.350921	0.57632	4.52923e-13
UniRef90_E5XFQ2	1262	0	0.678717	7.49988e-16	0.463723	0.463723	0.350988	0.576458	4.55455e-13
UniRef90_A0A173XXY3	1262	0	0.626479	7.54886e-16	0.463743	0.463743	0.350992	0.576494	4.57186e-13
UniRef90_A0A174E993	1262	0	0.791633	7.54474e-16	0.463571	0.463571	0.350862	0.576279	4.57186e-13
UniRef90_E5XED4	1262	0	0.720422	7.55249e-16	0.463643	0.463643	0.350916	0.576371	4.57186e-13
UniRef90_E5XJT4	1262	0	0.636879	7.55652e-16	0.463727	0.463727	0.350978	0.576476	4.57186e-13
UniRef90_E5XK32	1262	0.0120135	0.423665	7.5396e-16	0.464005	0.464005	0.351192	0.576817	4.57186e-13
UniRef90_A0A174EI15	1262	0	0.694065	7.56616e-16	0.463657	0.463657	0.350923	0.576391	4.57429e-13
UniRef90_A0A173XCV2	1262	0	0.677015	7.59095e-16	0.463633	0.463633	0.350899	0.576367	4.58489e-13
UniRef90_E5XD95	1262	0	0.827002	7.59497e-16	0.463494	0.463494	0.350793	0.576195	4.58489e-13
UniRef90_E5XJN0	1262	0	0.645577	7.6115e-16	0.463648	0.463648	0.350906	0.57639	4.59145e-13
UniRef90_E5XGQ8	1262	0	0.586518	7.66499e-16	0.463661	0.463661	0.350904	0.576418	4.62029e-13
UniRef90_E5XK25	1262	0	0.680221	7.68358e-16	0.463544	0.463544	0.350811	0.576277	4.62806e-13
UniRef90_A0A173ZGF5	1262	0	0.869937	7.69262e-16	0.463349	0.463349	0.350661	0.576036	4.63007e-13
UniRef90_A0A173YAX3	1262	0	0.734368	7.70631e-16	0.463475	0.463475	0.350754	0.576196	4.63488e-13
UniRef90_E5XFP3	1262	0	0.786817	7.74537e-16	0.463381	0.463381	0.350674	0.576088	4.65248e-13
UniRef90_UPI0004A80249	1262	0	0.973352	7.74703e-16	0.463169	0.463169	0.350513	0.575825	4.65248e-13
UniRef90_E5XEZ1	1262	0	0.574531	7.79891e-16	0.463536	0.463536	0.350779	0.576292	4.68003e-13
UniRef90_E5XFT9	1262	0.00235266	0.414589	7.80441e-16	0.463698	0.463698	0.350901	0.576495	4.68003e-13
UniRef90_A0A174AM18	1262	0	0.73266	7.83735e-16	0.46336	0.46336	0.350638	0.576082	4.69632e-13
UniRef90_A0A174FQW4	1262	0	0.550378	7.84707e-16	0.463523	0.463523	0.350759	0.576286	4.69867e-13
UniRef90_A0A173Z7I3	1262	0	0.551974	7.92695e-16	0.46344	0.46344	0.350679	0.576201	4.74301e-13
UniRef90_E5XEU6	1262	0	0.673401	7.96408e-16	0.463293	0.463293	0.35056	0.576027	4.76171e-13
UniRef90_E5XG01	1262	0.0141141	0.49207	8.07863e-16	0.463421	0.463421	0.350632	0.57621	4.82062e-13
UniRef90_E5XHN2	1262	0	0.574892	8.08039e-16	0.463293	0.463293	0.350535	0.576051	4.82062e-13
UniRef90_E5XIZ2	1262	0	0.553963	8.07001e-16	0.46331	0.46331	0.35055	0.57607	4.82062e-13
UniRef90_E5XK23	1262	0	0.926995	8.10647e-16	0.462887	0.462887	0.350222	0.575552	4.83263e-13
UniRef90_A0A173YI17	1262	0.00414169	0.474302	8.14183e-16	0.463337	0.463337	0.350556	0.576119	4.85015e-13
UniRef90_A0A174DIW5	1262	0	0.627388	8.2423e-16	0.463088	0.463088	0.350346	0.57583	4.9064e-13
UniRef90_E5XKC5	1262	0	0.70727	8.30345e-16	0.462959	0.462959	0.350235	0.575682	4.93918e-13
UniRef90_A0A173YET0	1262	0	0.570039	8.33832e-16	0.463058	0.463058	0.350304	0.575813	4.95364e-13
UniRef90_A0A174D6F8	1262	0	0.811904	8.33995e-16	0.462811	0.462811	0.350116	0.575506	4.95364e-13
UniRef90_A5KQM8	1262	0	0.810966	8.36558e-16	0.462813	0.462813	0.350113	0.575514	4.96524e-13
UniRef90_A0A0B4S0N3	1262	0	0.973712	8.43654e-16	0.462512	0.462512	0.34987	0.575153	4.98981e-13
UniRef90_A0A173ZB19	1262	0	0.681972	8.43351e-16	0.462879	0.462879	0.350149	0.57561	4.98981e-13
UniRef90_A0A174CCZ2	1262	0	0.520541	8.42187e-16	0.463043	0.463043	0.350275	0.575811	4.98981e-13
UniRef90_A5KN16	1262	0	0.583853	8.43768e-16	0.462967	0.462967	0.350214	0.575719	4.98981e-13
UniRef90_E5XH58	1262	0	0.518396	8.42695e-16	0.463034	0.463034	0.350267	0.575801	4.98981e-13
UniRef90_E5XJJ6	1262	0	0.746405	8.45459e-16	0.462787	0.462787	0.350075	0.575499	4.99617e-13
UniRef90_A0A0D8J4D4	1262	0	0.42605	8.51765e-16	0.463113	0.463113	0.350308	0.575918	5.02745e-13
UniRef90_E5XH53	1262	0	0.58755	8.51989e-16	0.462901	0.462901	0.350148	0.575655	5.02745e-13
UniRef90_A5KLE0	1262	0.00685404	0.303211	8.536e-16	0.463216	0.463216	0.350382	0.576049	5.0333e-13
UniRef90_A5KKE3	1262	0	0.74397	8.5465e-16	0.462724	0.462724	0.350008	0.57544	5.03583e-13
UniRef90_A0A174B3W1	1262	0	0.64446	8.57408e-16	0.462791	0.462791	0.350054	0.575529	5.04843e-13
UniRef90_E5XEG7	1262	0	0.663897	8.59669e-16	0.462766	0.462766	0.35003	0.575502	5.05441e-13
UniRef90_E5XFK1	1262	0.000109287	0.528566	8.59144e-16	0.462869	0.462869	0.350109	0.575629	5.05441e-13
UniRef90_F1T6L1	1262	0	0.533012	8.62143e-16	0.46285	0.46285	0.350089	0.575611	5.06529e-13
UniRef90_E5XEU1	1262	0	0.685443	8.6426e-16	0.462707	0.462707	0.349976	0.575438	5.07406e-13
UniRef90_E5XFN7	1262	0	0.767624	8.68997e-16	0.462578	0.462578	0.34987	0.575287	5.09819e-13
UniRef90_A0A173XGW3	1262	0	0.477802	8.7135e-16	0.462843	0.462843	0.350065	0.575621	5.10831e-13
UniRef90_E5XFK8	1262	0	0.793631	8.81141e-16	0.462457	0.462457	0.349754	0.57516	5.15888e-13
UniRef90_E5XJC1	1262	0	0.74419	8.81246e-16	0.462506	0.462506	0.349791	0.575221	5.15888e-13
UniRef90_A0A173Z073	1262	0	0.818249	8.87998e-16	0.462376	0.462376	0.34968	0.575073	5.19466e-13
UniRef90_A0A173XM98	1262	0	0.693711	8.89669e-16	0.462496	0.462496	0.349767	0.575225	5.20069e-13
UniRef90_E5XHM7	1262	0	0.538014	8.98308e-16	0.462548	0.462548	0.34979	0.575306	5.24742e-13
UniRef90_A0A174B327	1262	0	0.633893	8.99636e-16	0.462451	0.462451	0.349714	0.575189	5.25132e-13
UniRef90_A0A174CH27	1262	0	0.628033	9.00269e-16	0.462463	0.462463	0.349722	0.575204	5.25132e-13
UniRef90_A5KK17	1262	0	0.559448	9.04454e-16	0.462485	0.462485	0.349731	0.57524	5.27195e-13
UniRef90_E5XJ97	1262	0	0.650934	9.10696e-16	0.462345	0.462345	0.349613	0.575077	5.30453e-13
UniRef90_A0A173Z056	1262	0	0.735228	9.21467e-16	0.462189	0.462189	0.349474	0.574903	5.3481e-13
UniRef90_A0A174FB15	1262	0	0.696285	9.20952e-16	0.462244	0.462244	0.349517	0.57497	5.3481e-13
UniRef90_A5KIL4	1262	0	0.730842	9.1966e-16	0.462223	0.462223	0.349504	0.574943	5.3481e-13
UniRef90_E5XII9	1262	0	0.516903	9.18907e-16	0.462414	0.462414	0.349649	0.575178	5.3481e-13
UniRef90_UPI0009BFC057	1262	0	0.694393	9.21467e-16	0.462244	0.462244	0.349516	0.574972	5.3481e-13
UniRef90_R5QDE6	1262	0	0.767016	9.25644e-16	0.462116	0.462116	0.349412	0.574821	5.36851e-13
UniRef90_E5XEZ9	1262	0	0.650462	9.29377e-16	0.462212	0.462212	0.349478	0.574947	5.38631e-13
UniRef90_A5KJY9	1262	0	0.690011	9.31504e-16	0.462135	0.462135	0.349415	0.574854	5.39148e-13
UniRef90_E5XHV8	1262	0	0.64199	9.31595e-16	0.462206	0.462206	0.349469	0.574943	5.39148e-13
UniRef90_E5XER3	1262	0	0.858094	9.34951e-16	0.461939	0.461939	0.349261	0.574618	5.40704e-13
UniRef90_E5XE63	1262	0	0.756989	9.41167e-16	0.46202	0.46202	0.349311	0.57473	5.43912e-13
UniRef90_A0A174AIV8	1262	0	0.652255	9.45977e-16	0.462074	0.462074	0.349343	0.574806	5.46303e-13
UniRef90_A0A174ED05	1262	0	0.821523	9.53055e-16	0.46183	0.46183	0.349145	0.574515	5.5e-13
UniRef90_E5XHX8	1262	0	0.832285	9.55779e-16	0.461815	0.461815	0.349129	0.574501	5.51181e-13
UniRef90_E5XHI0	1262	0	0.78456	9.67776e-16	0.461765	0.461765	0.34907	0.57446	5.57703e-13
UniRef90_A0A173YXE0	1262	4.92271	0.504337	9.69264e-16	0.483546	0.483546	0.365532	0.60156	5.58165e-13
UniRef90_E5XJ41	1262	0	0.816805	9.74015e-16	0.46168	0.46168	0.348994	0.574366	5.60353e-13
UniRef90_E5XK01	1262	0	0.577499	9.74443e-16	0.461928	0.461928	0.349181	0.574675	5.60353e-13
UniRef90_E7MN44	1202	0	0.995184	9.75159e-16	0.473167	0.473167	0.357676	0.588659	5.60368e-13
UniRef90_E5XFQ4	1262	0	0.889912	9.77502e-16	0.461587	0.461587	0.348918	0.574256	5.61317e-13
UniRef90_A0A174DZD9	1262	0	0.865914	9.79336e-16	0.461634	0.461634	0.34895	0.574318	5.61974e-13
UniRef90_E5XDX6	1262	0	0.655301	9.80789e-16	0.461779	0.461779	0.349058	0.574501	5.6241e-13
UniRef90_A0A174C1W1	1262	0	0.675111	9.86522e-16	0.461739	0.461739	0.349017	0.574462	5.65298e-13
UniRef90_A5KJ03	1262	0	0.609631	9.90469e-16	0.461787	0.461787	0.349046	0.574528	5.6716e-13
UniRef90_E5XFI2	1262	0	0.857512	9.96163e-16	0.461482	0.461482	0.348806	0.574157	5.70019e-13
UniRef90_A0A173YJ97	1262	0	0.728423	1.00032e-15	0.461617	0.461617	0.348901	0.574333	5.71914e-13
UniRef90_A0A173Z8P3	1262	0	0.545387	1.00299e-15	0.461743	0.461743	0.348991	0.574495	5.71914e-13
UniRef90_A0A173ZBX0	1262	0	0.727265	1.00299e-15	0.461591	0.461591	0.348876	0.574305	5.71914e-13
UniRef90_A0A174B3Z3	1262	0	0.812582	1.00233e-15	0.4615	0.4615	0.348809	0.574192	5.71914e-13
UniRef90_R5QIC0	1262	0	0.760722	1.00267e-15	0.46155	0.46155	0.348846	0.574254	5.71914e-13
UniRef90_E5XDH9	1262	0.00325002	0.550821	1.01656e-15	0.461652	0.461652	0.348899	0.574404	5.79241e-13
UniRef90_E5XJX3	1262	0	0.745983	1.01743e-15	0.461454	0.461454	0.348748	0.57416	5.79334e-13
UniRef90_A5KLB8	1262	0.00484079	0.407148	1.01994e-15	0.461784	0.461784	0.348993	0.574574	5.80354e-13
UniRef90_A0A173XSF2	1262	0	0.706374	1.02274e-15	0.461456	0.461456	0.348741	0.574171	5.81155e-13
UniRef90_A0A173ZMQ6	1262	0	0.556661	1.02278e-15	0.461591	0.461591	0.348843	0.574339	5.81155e-13
UniRef90_E5XJC4	1262	0	0.622794	1.02825e-15	0.461494	0.461494	0.34876	0.574228	5.83857e-13
UniRef90_E5XDH8	1262	0	0.689901	1.03008e-15	0.461414	0.461414	0.348697	0.574132	5.83917e-13
UniRef90_E5XF99	1262	0	0.778177	1.03051e-15	0.461335	0.461335	0.348636	0.574033	5.83917e-13
UniRef90_E5XFN9	1262	0	0.499075	1.02993e-15	0.461605	0.461605	0.348841	0.574368	5.83917e-13
UniRef90_A0A173XC00	1262	0	0.640861	1.03804e-15	0.461417	0.461417	0.348686	0.574148	5.87772e-13
UniRef90_A0A174ABR2	1262	0	0.562575	1.04111e-15	0.461473	0.461473	0.348723	0.574223	5.89099e-13
UniRef90_G9RVC0	1262	0.00825131	0.405217	1.04529e-15	0.461694	0.461694	0.348883	0.574505	5.91054e-13
UniRef90_A0A174BJS7	1262	3.25922e-05	0.492827	1.05174e-15	0.461453	0.461453	0.34869	0.574215	5.93581e-13
UniRef90_A5KII2	1262	1.29432e-05	0.392531	1.05076e-15	0.46155	0.46155	0.348765	0.574334	5.93581e-13
UniRef90_A5KPK9	1262	0	0.799802	1.0524e-15	0.461176	0.461176	0.34848	0.573871	5.93581e-13
UniRef90_E5XGW4	1262	0	0.748781	1.05268e-15	0.461211	0.461211	0.348506	0.573916	5.93581e-13
UniRef90_A5KLK0	1262	0	0.78286	1.05517e-15	0.461173	0.461173	0.348473	0.573873	5.9457e-13
UniRef90_A0A174AMP7	1262	0	0.821621	1.06296e-15	0.461054	0.461054	0.348371	0.573738	5.98547e-13
UniRef90_E5XDB4	1262	0	0.546356	1.06761e-15	0.461316	0.461316	0.348561	0.574071	6.0075e-13
UniRef90_A0A174AP98	1262	0	0.566746	1.07258e-15	0.46124	0.46124	0.348495	0.573984	6.03126e-13
UniRef90_A0A174FHK7	1262	0	0.665022	1.08269e-15	0.46109	0.46109	0.348366	0.573814	6.08391e-13
UniRef90_F3AYS0	1262	0.000637907	0.404804	1.08443e-15	0.461327	0.461327	0.348542	0.574112	6.08947e-13
UniRef90_A0A135YQD1	1262	0	0.959317	1.09273e-15	0.46069	0.46069	0.348048	0.573332	6.13186e-13
UniRef90_A5KMF0	1262	0	0.855176	1.09447e-15	0.460805	0.460805	0.348132	0.573477	6.13736e-13
UniRef90_A0A173YB20	1262	0	0.665606	1.099e-15	0.460972	0.460972	0.348251	0.573693	6.15854e-13
UniRef90_A0A173YKR6	1262	0	0.530443	1.10044e-15	0.461105	0.461105	0.348349	0.57386	6.16234e-13
UniRef90_A0A173ZP80	1262	0	0.712713	1.10158e-15	0.460935	0.460935	0.348219	0.573651	6.16448e-13
UniRef90_E5XDX4	1262	0	0.55333	1.10383e-15	0.461048	0.461048	0.348301	0.573796	6.17285e-13
UniRef90_A0A173YIJ1	1262	0	0.657687	1.10543e-15	0.460954	0.460954	0.348228	0.573681	6.1775e-13
UniRef90_E5XD84	1262	0	0.888194	1.11444e-15	0.460639	0.460639	0.347975	0.573302	6.22361e-13
UniRef90_F3ASJ1	1262	0	0.8405	1.11526e-15	0.460705	0.460705	0.348024	0.573387	6.2239e-13
UniRef90_A0A173Y0I0	1262	0	0.761626	1.11963e-15	0.46073	0.46073	0.348036	0.573424	6.24008e-13
UniRef90_A5KQZ4	1262	0	0.502225	1.1197e-15	0.461002	0.461002	0.348242	0.573763	6.24008e-13
UniRef90_A0A0B4S2D0	1262	0	0.997336	1.12151e-15	0.46033	0.46033	0.347731	0.572929	6.2416e-13
UniRef90_A5KQ63	1262	0	0.530699	1.12106e-15	0.460962	0.460962	0.348209	0.573715	6.2416e-13
UniRef90_A0A174BYG1	1262	0	0.740302	1.12333e-15	0.460742	0.460742	0.34804	0.573445	6.24749e-13
UniRef90_A5KNM7	1262	0	0.566151	1.1243e-15	0.460904	0.460904	0.34816	0.573647	6.2486e-13
UniRef90_A0A174DRS7	1262	0	0.721925	1.13175e-15	0.460702	0.460702	0.347996	0.573408	6.28571e-13
UniRef90_A0A174F7W6	1262	0	0.550381	1.13276e-15	0.460857	0.460857	0.348112	0.573603	6.28704e-13
UniRef90_E5XJ38	1262	0	0.698692	1.13607e-15	0.460698	0.460698	0.347987	0.573409	6.30108e-13
UniRef90_A5KLS7	1202	0.0065351	0.460467	1.14191e-15	0.47267	0.47267	0.357021	0.58832	6.32914e-13
UniRef90_A5KNP9	1262	0	0.824609	1.14893e-15	0.460494	0.460494	0.347813	0.573174	6.36374e-13
UniRef90_A5KM27	1262	0	0.82795	1.15085e-15	0.460476	0.460476	0.347797	0.573155	6.36782e-13
UniRef90_E5XJC3	1262	0	0.5961	1.15124e-15	0.460697	0.460697	0.347963	0.57343	6.36782e-13
UniRef90_A0A3E2WRD5	1262	2.58355	0.341644	1.15517e-15	0.472322	0.472322	0.356737	0.587906	6.3809e-13
UniRef90_E5XJ71	1262	0	0.611033	1.15454e-15	0.460656	0.460656	0.347927	0.573385	6.3809e-13
UniRef90_E5XIT5	1262	0	0.778843	1.1656e-15	0.460448	0.460448	0.347753	0.573142	6.43411e-13
UniRef90_A5KPW3	1262	0	0.542054	1.16874e-15	0.460648	0.460648	0.3479	0.573397	6.44707e-13
UniRef90_A0A174D4D7	1262	0	0.629243	1.17284e-15	0.460533	0.460533	0.347807	0.573259	6.46527e-13
UniRef90_F3AW18	1262	0.000950746	0.434755	1.17998e-15	0.460674	0.460674	0.347903	0.573445	6.50022e-13
UniRef90_E5XG75	1262	0.00514085	0.4642	1.19027e-15	0.460597	0.460597	0.347829	0.573364	6.55251e-13
UniRef90_A0A173XR22	1262	0	0.841595	1.20103e-15	0.460155	0.460155	0.34748	0.57283	6.59833e-13
UniRef90_A5KPR9	1262	0	0.66398	1.20013e-15	0.460351	0.460351	0.34763	0.573073	6.59833e-13
UniRef90_E5XDM8	1262	0	0.841966	1.20094e-15	0.460151	0.460151	0.347477	0.572825	6.59833e-13
UniRef90_R5ACG8	1262	0	0.717052	1.20325e-15	0.460363	0.460363	0.347634	0.573092	6.60603e-13
UniRef90_E5XK39	1262	0	0.864709	1.20431e-15	0.460102	0.460102	0.347435	0.572768	6.6074e-13
UniRef90_F3ARY0	1262	0	0.865889	1.20813e-15	0.460091	0.460091	0.347422	0.57276	6.62387e-13
UniRef90_E5XDS1	1262	0	0.58159	1.20896e-15	0.460368	0.460368	0.34763	0.573106	6.62399e-13
UniRef90_E5XHS3	1262	0	0.597481	1.21994e-15	0.460278	0.460278	0.347546	0.57301	6.67965e-13
UniRef90_A0A173XKG7	1262	0	0.667988	1.23207e-15	0.460135	0.460135	0.347421	0.572849	6.7415e-13
UniRef90_E5XDS6	1262	0	0.654288	1.23762e-15	0.460131	0.460131	0.34741	0.572852	6.76275e-13
UniRef90_E5XEX8	1262	0	0.489549	1.23756e-15	0.460278	0.460278	0.347521	0.573034	6.76275e-13
UniRef90_A5KNW1	1262	0	0.688487	1.24058e-15	0.460076	0.460076	0.347364	0.572788	6.77438e-13
UniRef90_E5XFX7	1262	0	0.643731	1.2454e-15	0.460077	0.460077	0.347358	0.572795	6.79616e-13
UniRef90_E5XER1	1262	3.01343e-05	0.473991	1.25082e-15	0.4602	0.4602	0.347444	0.572956	6.82114e-13
UniRef90_A0A174AD60	1262	0	0.614907	1.25377e-15	0.460066	0.460066	0.347339	0.572793	6.83265e-13
UniRef90_A0A174F5U2	1262	0.00745582	0.438822	1.26254e-15	0.460246	0.460246	0.347463	0.57303	6.87473e-13
UniRef90_A5KR81	1262	0	0.546809	1.26319e-15	0.460067	0.460067	0.347326	0.572808	6.87473e-13
UniRef90_F3AXP5	1262	0	0.782272	1.26939e-15	0.459823	0.459823	0.347134	0.572512	6.90383e-13
UniRef90_R5QEX1	1262	0	0.715338	1.28677e-15	0.459804	0.459804	0.347096	0.572513	6.9937e-13
UniRef90_E5XDQ6	1262	0	0.726964	1.28863e-15	0.459756	0.459756	0.347057	0.572455	6.99912e-13
UniRef90_E5XE59	1262	0	0.488457	1.29303e-15	0.459957	0.459957	0.347203	0.572711	7.01832e-13
UniRef90_A0A173ZSK8	1262	0	0.615988	1.30402e-15	0.459773	0.459773	0.347049	0.572497	7.07324e-13
UniRef90_A0A174D2J3	1262	0	0.873298	1.31884e-15	0.459436	0.459436	0.346775	0.572097	7.14886e-13
UniRef90_A0A174AYD3	1262	0.0174853	0.559723	1.32178e-15	0.459808	0.459808	0.347052	0.572564	7.16003e-13
UniRef90_A0A173Z1K6	1262	0	0.774231	1.32276e-15	0.45952	0.45952	0.346834	0.572207	7.1606e-13
UniRef90_A5KLW3	1262	0	0.655848	1.3349e-15	0.459569	0.459569	0.346854	0.572283	7.22147e-13
UniRef90_A0A173XD37	1262	0	0.52604	1.33612e-15	0.459667	0.459667	0.346927	0.572408	7.22327e-13
UniRef90_E5XEI6	1262	0	0.709575	1.33858e-15	0.459513	0.459513	0.346807	0.572218	7.23174e-13
UniRef90_E5XK96	1262	0	0.673498	1.34814e-15	0.459479	0.459479	0.346769	0.572188	7.27856e-13
UniRef90_A0A174B6Y5	1262	0	0.654531	1.34986e-15	0.459496	0.459496	0.34678	0.572212	7.28304e-13
UniRef90_E5XHS0	1262	0	0.703226	1.35601e-15	0.459401	0.459401	0.3467	0.572101	7.31133e-13
UniRef90_A0A174B351	1262	0	0.727594	1.36628e-15	0.459327	0.459327	0.346631	0.572022	7.34859e-13
UniRef90_A5KP03	1262	0	0.815408	1.36525e-15	0.459252	0.459252	0.346576	0.571927	7.34859e-13
UniRef90_E5XHU2	1262	0	0.636269	1.36613e-15	0.459426	0.459426	0.346706	0.572145	7.34859e-13
UniRef90_R5AH98	1262	0	0.761563	1.36654e-15	0.459383	0.459383	0.346673	0.572093	7.34859e-13
UniRef90_E5XEX7	1262	0	0.705744	1.36868e-15	0.459347	0.459347	0.346643	0.57205	7.35524e-13
UniRef90_E5XDM1	1262	0	0.676083	1.37467e-15	0.459329	0.459329	0.346622	0.572035	7.38255e-13
UniRef90_E5XHK6	1262	5.12887	0.499324	1.38306e-15	0.481713	0.481713	0.363502	0.599923	7.4227e-13
UniRef90_E5XE72	1262	0	0.560285	1.38826e-15	0.459369	0.459369	0.346635	0.572103	7.44572e-13
UniRef90_E5XIW7	1262	0	0.715721	1.39098e-15	0.45923	0.45923	0.346527	0.571933	7.45539e-13
UniRef90_A0A173YL21	1262	6.72352e-05	0.485904	1.4e-15	0.459376	0.459376	0.346626	0.572126	7.49876e-13
UniRef90_A0A173X9N6	1262	0	0.591279	1.40673e-15	0.45925	0.45925	0.346523	0.571978	7.52986e-13
UniRef90_E5XK87	1262	0	0.574476	1.40957e-15	0.459246	0.459246	0.346516	0.571976	7.54009e-13
UniRef90_A5KJZ8	1262	0	0.77694	1.41191e-15	0.459037	0.459037	0.346356	0.571719	7.54764e-13
UniRef90_A0A174A3K3	1262	0	0.661764	1.41934e-15	0.459131	0.459131	0.346417	0.571844	7.57242e-13
UniRef90_E5XIU0	1262	0	0.881557	1.41866e-15	0.458901	0.458901	0.346244	0.571557	7.57242e-13
UniRef90_F3AQL1	1262	0	0.896699	1.41914e-15	0.458883	0.458883	0.346231	0.571536	7.57242e-13
UniRef90_A0A173XRF5	1262	0	0.788814	1.42419e-15	0.45897	0.45897	0.34629	0.57165	7.5933e-13
UniRef90_A5KLA5	1262	0	0.624968	1.42742e-15	0.45911	0.45911	0.346391	0.571828	7.60064e-13
UniRef90_E5XGL6	1262	0	0.560572	1.42744e-15	0.459166	0.459166	0.346434	0.571898	7.60064e-13
UniRef90_A0A174AP02	1262	0	0.803972	1.42989e-15	0.458913	0.458913	0.34624	0.571586	7.60457e-13
UniRef90_A0A174CN44	1262	0	0.800843	1.43005e-15	0.458925	0.458925	0.346249	0.571601	7.60457e-13
UniRef90_E5XHM3	1262	0	0.66142	1.44106e-15	0.459009	0.459009	0.346299	0.57172	7.65811e-13
UniRef90_A5KPV8	1262	0	0.540106	1.44296e-15	0.459121	0.459121	0.346381	0.571862	7.66322e-13
UniRef90_E5XG20	1262	0.158698	0.48197	1.4507e-15	0.459837	0.459837	0.346912	0.572762	7.69927e-13
UniRef90_A5KJA2	1262	0	0.722953	1.453e-15	0.458887	0.458887	0.346193	0.571582	7.70644e-13
UniRef90_A5KK68	1262	0	0.711788	1.45682e-15	0.458874	0.458874	0.346178	0.57157	7.72166e-13
UniRef90_A0A174EDR9	1262	0	0.880378	1.45888e-15	0.458701	0.458701	0.346045	0.571357	7.72752e-13
UniRef90_A0A173YKW0	1262	0	0.657047	1.45989e-15	0.458905	0.458905	0.346197	0.571612	7.72788e-13
UniRef90_E5XJS9	1262	0	0.756791	1.4686e-15	0.458782	0.458782	0.346095	0.57147	7.76891e-13
UniRef90_A5KIQ1	1262	0	0.618821	1.47222e-15	0.458872	0.458872	0.346158	0.571586	7.78299e-13
UniRef90_E5XFK5	1262	0	0.612017	1.48191e-15	0.458843	0.458843	0.346125	0.571561	7.82405e-13
UniRef90_E5XFL6	1262	0	0.868235	1.48177e-15	0.458597	0.458597	0.345939	0.571254	7.82405e-13
UniRef90_A5KJ92	1262	0	0.507382	1.48545e-15	0.458935	0.458935	0.34619	0.57168	7.83764e-13
UniRef90_A5KMV1	1262	0	0.728671	1.48763e-15	0.458712	0.458712	0.346019	0.571404	7.84401e-13
UniRef90_E5XJ43	1262	0	0.615125	1.48888e-15	0.458802	0.458802	0.346086	0.571518	7.84537e-13
UniRef90_E5XKD0	1262	0	0.612001	1.48981e-15	0.458814	0.458814	0.346094	0.571534	7.84537e-13
UniRef90_A0A173YW73	1262	0	0.74499	1.49574e-15	0.458645	0.458645	0.345959	0.57133	7.86827e-13
UniRef90_E5XI69	1262	1.23421	0.496313	1.4961e-15	0.464327	0.464327	0.350244	0.578409	7.86827e-13
UniRef90_A0A174C7Z4	1262	0	0.926008	1.4995e-15	0.458441	0.458441	0.345801	0.571081	7.88108e-13
UniRef90_A0A173Y9N9	1262	0	0.591329	1.50135e-15	0.458771	0.458771	0.346048	0.571494	7.88567e-13
UniRef90_E5XF24	1262	0.00998656	0.511329	1.50894e-15	0.458832	0.458832	0.346085	0.571579	7.92043e-13
UniRef90_E5XEK1	1262	0	0.86976	1.51179e-15	0.45845	0.45845	0.345794	0.571107	7.93026e-13
UniRef90_A0A174ANR9	1262	0	0.937417	1.52325e-15	0.458285	0.458285	0.345656	0.570914	7.98521e-13
UniRef90_E5XDC2	1262	0	0.556358	1.53962e-15	0.458632	0.458632	0.345899	0.571365	8.06585e-13
UniRef90_A5KQ06	1262	0	0.860665	1.5456e-15	0.458318	0.458318	0.345655	0.570981	8.09196e-13
UniRef90_E5XJW7	1262	0	0.665375	1.54772e-15	0.458485	0.458485	0.345779	0.571191	8.09781e-13
UniRef90_A0A173XR63	1262	0	0.734381	1.56004e-15	0.458361	0.458361	0.345671	0.57105	8.15702e-13
UniRef90_A0A174FER7	1262	0.00148834	0.556476	1.56176e-15	0.45855	0.45855	0.345812	0.571288	8.16078e-13
UniRef90_A0A173Z8N2	1262	0	0.697621	1.56844e-15	0.45836	0.45836	0.345661	0.571058	8.17988e-13
UniRef90_A0A174D4U1	1262	0	0.757187	1.56803e-15	0.458291	0.458291	0.34561	0.570972	8.17988e-13
UniRef90_A5KKU4	1262	0	0.757789	1.56806e-15	0.45829	0.45829	0.345609	0.570972	8.17988e-13
UniRef90_A0A174BZ69	1262	0	0.706484	1.57174e-15	0.458335	0.458335	0.345639	0.571032	8.19183e-13
UniRef90_A5KQ64	1262	0	0.688565	1.58191e-15	0.4583	0.4583	0.345601	0.570999	8.23956e-13
UniRef90_A5KLU7	1262	0	0.617441	1.58496e-15	0.458344	0.458344	0.345631	0.571057	8.25015e-13
UniRef90_A5KIM1	1262	0	0.657906	1.58702e-15	0.458306	0.458306	0.3456	0.571012	8.25559e-13
UniRef90_E5XF38	1262	0	0.853505	1.59406e-15	0.458056	0.458056	0.345404	0.570708	8.28692e-13
UniRef90_A0A174DEC4	1262	0	0.558003	1.60141e-15	0.458333	0.458333	0.345605	0.571061	8.31982e-13
UniRef90_E5XIS7	1262	0	0.780841	1.6103e-15	0.458083	0.458083	0.345406	0.570759	8.36064e-13
UniRef90_A5KKN5	1262	0	0.73432	1.613e-15	0.45813	0.45813	0.345439	0.570821	8.36932e-13
UniRef90_A0A173YDK8	1262	0	0.612544	1.61904e-15	0.4582	0.4582	0.345485	0.570914	8.38996e-13
UniRef90_E5XJ34	1262	0	0.653465	1.61803e-15	0.458169	0.458169	0.345463	0.570875	8.38996e-13
UniRef90_A5KRD6	1262	0.00624141	0.438942	1.6239e-15	0.45837	0.45837	0.345608	0.571131	8.40977e-13
UniRef90_A0A173ZNR8	1262	0	0.722317	1.63428e-15	0.458039	0.458039	0.345347	0.57073	8.45615e-13
UniRef90_F3AR90	1262	0	0.696348	1.63494e-15	0.458041	0.458041	0.345348	0.570734	8.45615e-13
UniRef90_A0A174E5J1	1262	0	0.587674	1.63751e-15	0.458151	0.458151	0.345429	0.570873	8.46404e-13
UniRef90_A0A174D2L2	1262	0	0.654748	1.6437e-15	0.458064	0.458064	0.345356	0.570772	8.48786e-13
UniRef90_A5KMV9	1262	0	0.632464	1.6442e-15	0.458071	0.458071	0.345361	0.570782	8.48786e-13
UniRef90_A0A174D5K7	1262	0	0.740855	1.64606e-15	0.457953	0.457953	0.34527	0.570636	8.49203e-13
UniRef90_A5KLH3	1262	0	0.634159	1.66198e-15	0.457988	0.457988	0.34528	0.570697	8.56875e-13
UniRef90_A0A173XBP4	1262	0	0.773175	1.67831e-15	0.457796	0.457796	0.345118	0.570474	8.64745e-13
UniRef90_A0A173XH09	1262	0	0.789016	1.68476e-15	0.457756	0.457756	0.345081	0.570431	8.67519e-13
UniRef90_E5XK72	1262	0.0143892	0.301909	1.68912e-15	0.458285	0.458285	0.345475	0.571094	8.69211e-13
UniRef90_A0A174E0H2	1262	0	0.669553	1.69138e-15	0.457826	0.457826	0.345127	0.570525	8.69276e-13
UniRef90_A5KNE9	1262	0	0.771646	1.69059e-15	0.457718	0.457718	0.345046	0.570389	8.69276e-13
UniRef90_A0A173ZSF9	1262	0	0.740938	1.69849e-15	0.457727	0.457727	0.345045	0.570409	8.72377e-13
UniRef90_A0A174B1Y4	1262	0	0.564434	1.72886e-15	0.457769	0.457769	0.345046	0.570493	8.86856e-13
UniRef90_E5XJ07	1262	0.00305507	0.387637	1.72858e-15	0.457961	0.457961	0.345191	0.570732	8.86856e-13
UniRef90_E5XEP8	1262	0	0.515432	1.73889e-15	0.457772	0.457772	0.345037	0.570506	8.91436e-13
UniRef90_E5XI62	1262	0	0.595138	1.74393e-15	0.457678	0.457678	0.344961	0.570394	8.93458e-13
UniRef90_R5QBV8	1262	0.000624029	0.307165	1.74566e-15	0.457991	0.457991	0.345196	0.570786	8.93777e-13
UniRef90_E5XFL5	1262	0	0.627047	1.75862e-15	0.457588	0.457588	0.344879	0.570296	8.99845e-13
UniRef90_E5XF07	1262	0	0.657358	1.77358e-15	0.457513	0.457513	0.344808	0.570219	9.06931e-13
UniRef90_A5KPR4	1262	0	0.577586	1.7864e-15	0.457534	0.457534	0.344811	0.570257	9.12913e-13
UniRef90_E5XII5	1262	0	0.76844	1.79312e-15	0.45731	0.45731	0.344635	0.569984	9.15769e-13
UniRef90_A0A173XSS0	1262	0	0.921467	1.79623e-15	0.457132	0.457132	0.344498	0.569765	9.16783e-13
UniRef90_A5KKM1	1262	0	0.6732	1.80337e-15	0.457377	0.457377	0.344676	0.570078	9.19847e-13
UniRef90_Q184E3	1262	0	0.887471	1.80507e-15	0.457175	0.457175	0.344522	0.569828	9.20137e-13
UniRef90_A5KMU4	1262	0	0.718408	1.81107e-15	0.457297	0.457297	0.344608	0.569985	9.22619e-13
UniRef90_E5XJ81	1262	0	0.71913	1.81255e-15	0.45727	0.45727	0.344587	0.569954	9.22795e-13
UniRef90_A0A174EDD7	1262	0.0125944	0.528564	1.81587e-15	0.45749	0.45749	0.344749	0.570231	9.23905e-13
UniRef90_A0A174DGL8	1262	0	0.496825	1.82531e-15	0.45744	0.45744	0.344702	0.570178	9.28127e-13
UniRef90_A0A173Z879	1262	0	0.565847	1.83411e-15	0.457325	0.457325	0.344607	0.570043	9.31911e-13
UniRef90_A0A174F3J5	1262	0	0.655843	1.83531e-15	0.457244	0.457244	0.344545	0.569944	9.31911e-13
UniRef90_A5KPV0	1262	0	0.810594	1.83619e-15	0.457089	0.457089	0.344427	0.569751	9.31911e-13
UniRef90_A0A174CGE8	1262	0	0.842778	1.83877e-15	0.457051	0.457051	0.344397	0.569706	9.32637e-13
UniRef90_R8VZ56	1262	0	0.804763	1.85443e-15	0.45704	0.45704	0.344373	0.569706	9.39994e-13
UniRef90_A0A173XSP3	1262	0	0.532085	1.86969e-15	0.457229	0.457229	0.344501	0.569957	9.47134e-13
UniRef90_E5XJ83	1262	0	0.759745	1.87293e-15	0.457006	0.457006	0.34433	0.569681	9.48184e-13
UniRef90_A0A133ZPB7	1156	0	0.891246	1.88287e-15	0.478011	0.478011	0.360147	0.595876	9.52626e-13
UniRef90_A0A173ZFV5	1262	0	0.6603	1.88636e-15	0.457041	0.457041	0.344344	0.569738	9.53796e-13
UniRef90_E5XD80	1262	0	0.716207	1.8929e-15	0.45696	0.45696	0.344277	0.569644	9.56511e-13
UniRef90_F3ATS1	1262	0	0.889092	1.89498e-15	0.456764	0.456764	0.344128	0.569401	9.56967e-13
UniRef90_A0A173ZHF6	1262	0	0.701024	1.89756e-15	0.456958	0.456958	0.344271	0.569645	9.5708e-13
UniRef90_E5XKC0	1262	0.0129689	0.302967	1.89679e-15	0.457421	0.457421	0.344621	0.570222	9.5708e-13
UniRef90_A0A173YN60	1262	0	0.570973	1.90382e-15	0.45707	0.45707	0.34435	0.56979	9.58451e-13
UniRef90_A0A174CXF5	1262	0	0.546528	1.90353e-15	0.457077	0.457077	0.344355	0.569798	9.58451e-13
UniRef90_E5XDI0	1262	0	0.812622	1.90366e-15	0.456829	0.456829	0.344168	0.569489	9.58451e-13
UniRef90_E5XH36	1262	0	0.912241	1.90509e-15	0.456698	0.456698	0.344068	0.569328	9.58494e-13
UniRef90_E5XDT0	1262	8.4865	0.495082	1.90901e-15	0.493525	0.493525	0.371809	0.615241	9.59873e-13
UniRef90_A0A174CVL1	1262	0	0.912456	1.93152e-15	0.4566	0.4566	0.34397	0.56923	9.69627e-13
UniRef90_A0A2D3NE37	1262	0.00421494	0.338037	1.93199e-15	0.457206	0.457206	0.344426	0.569986	9.69627e-13
UniRef90_E5XFT1	1262	0	0.753898	1.93173e-15	0.456783	0.456783	0.344108	0.569459	9.69627e-13
UniRef90_A0A173ZDP6	1262	0	0.738117	1.93747e-15	0.456779	0.456779	0.344099	0.569458	9.71179e-13
UniRef90_A5KKU9	1262	0	0.777282	1.93741e-15	0.456739	0.456739	0.344069	0.569409	9.71179e-13
UniRef90_E5XI34	1262	0	0.645162	1.9445e-15	0.45685	0.45685	0.344147	0.569554	9.74105e-13
UniRef90_A0A173ZPB9	1262	0	0.688985	1.94985e-15	0.456769	0.456769	0.34408	0.569457	9.76181e-13
UniRef90_E5XHV7	1262	0	0.611943	1.96577e-15	0.456782	0.456782	0.344077	0.569488	9.83543e-13
UniRef90_E5XGW5	1262	0	0.518574	1.96779e-15	0.456861	0.456861	0.344134	0.569588	9.83951e-13
UniRef90_E5XII1	1262	0	0.534678	1.9707e-15	0.456829	0.456829	0.344107	0.569551	9.84796e-13
UniRef90_A0A173XWH1	1262	0	0.787001	1.97835e-15	0.456574	0.456574	0.343908	0.56924	9.88016e-13
UniRef90_E5XJK5	1262	0	0.684949	1.98006e-15	0.456654	0.456654	0.343967	0.569341	9.88262e-13
UniRef90_E5XFQ1	1262	0	0.738467	1.98173e-15	0.456601	0.456601	0.343926	0.569277	9.88489e-13
UniRef90_A0A174A0J6	1262	0	0.717263	2.0004e-15	0.456568	0.456568	0.343885	0.569252	9.97189e-13
UniRef90_A0A174ELW8	1262	0	0.578087	2.00678e-15	0.456683	0.456683	0.343965	0.569401	9.99756e-13
UniRef90_E5XEZ0	1262	0.00285115	0.42687	2.00966e-15	0.456818	0.456818	0.344064	0.569571	1.00057e-12
UniRef90_E5XJ40	1262	0	0.86386	2.01384e-15	0.456361	0.456361	0.343717	0.569006	1.00204e-12
UniRef90_A0A174A7V3	1262	0	0.772243	2.01564e-15	0.456453	0.456453	0.343784	0.569122	1.00232e-12
UniRef90_A0A173XKK0	1262	0	0.687728	2.0261e-15	0.456493	0.456493	0.343806	0.569181	1.00691e-12
UniRef90_A0A174EHW3	1262	0	0.709047	2.03693e-15	0.45644	0.45644	0.343756	0.569123	1.01121e-12
UniRef90_E5XIY5	1262	0	0.780114	2.03724e-15	0.456375	0.456375	0.343707	0.569044	1.01121e-12
UniRef90_E5XDF7	1262	0	0.622423	2.05305e-15	0.456436	0.456436	0.343739	0.569133	1.01843e-12
UniRef90_A0A173ZAS5	1262	0	0.630068	2.06233e-15	0.45641	0.45641	0.343712	0.569109	1.02241e-12
UniRef90_A5KQS8	1262	0	0.741992	2.06951e-15	0.456275	0.456275	0.343604	0.568946	1.02535e-12
UniRef90_F3ASS2	1262	0	0.76961	2.07286e-15	0.456252	0.456252	0.343584	0.568921	1.02638e-12
UniRef90_E5XGZ2	1262	0	0.761238	2.08286e-15	0.456214	0.456214	0.343547	0.568882	1.0307e-12
UniRef90_A0A174FC97	1262	0.00158026	0.514133	2.08961e-15	0.456404	0.456404	0.343684	0.569124	1.03278e-12
UniRef90_E5XJT3	1262	0.0151155	0.494419	2.08955e-15	0.456514	0.456514	0.343767	0.569261	1.03278e-12
UniRef90_A0A174FJ95	1262	0	0.5995	2.10064e-15	0.456319	0.456319	0.343611	0.569028	1.03761e-12
UniRef90_F3ARW9	1262	0	0.553837	2.10595e-15	0.456346	0.456346	0.343626	0.569065	1.0396e-12
UniRef90_A0A174D4Y9	1262	0	0.721763	2.11954e-15	0.45613	0.45613	0.343452	0.568807	1.04567e-12
UniRef90_E5XJ98	1262	0	0.70791	2.13079e-15	0.456112	0.456112	0.34343	0.568794	1.05058e-12
UniRef90_G9RNU8	1262	0.00589932	0.289884	2.13254e-15	0.456618	0.456618	0.343809	0.569426	1.05081e-12
UniRef90_A5KML8	1262	0	0.600002	2.14088e-15	0.456152	0.456152	0.343452	0.568853	1.05428e-12
UniRef90_E5XFS9	1262	0	0.827833	2.1464e-15	0.455923	0.455923	0.343275	0.568572	1.05636e-12
UniRef90_A5KPD1	1262	0	0.797571	2.15238e-15	0.455941	0.455941	0.343283	0.568599	1.05819e-12
UniRef90_UPI0009E3280C	1262	0	0.709312	2.15273e-15	0.456028	0.456028	0.343349	0.568708	1.05819e-12
UniRef90_A0A173Z409	1262	0	0.448639	2.1671e-15	0.456234	0.456234	0.343492	0.568976	1.06461e-12
UniRef90_E5XDE4	1262	0	0.678607	2.17864e-15	0.455961	0.455961	0.343277	0.568645	1.06963e-12
UniRef90_A5KM38	1262	0	0.658457	2.18085e-15	0.455986	0.455986	0.343294	0.568678	1.07007e-12
UniRef90_E5XD90	1262	0	0.757043	2.18558e-15	0.455875	0.455875	0.343206	0.568543	1.07175e-12
UniRef90_E5XDT7	1262	0	0.777484	2.18786e-15	0.455851	0.455851	0.343187	0.568516	1.07191e-12
UniRef90_E5XJ37	1262	0	0.764467	2.18855e-15	0.455864	0.455864	0.343196	0.568532	1.07191e-12
UniRef90_E5XFD2	1262	0	0.73672	2.19112e-15	0.455862	0.455862	0.343193	0.568532	1.07252e-12
UniRef90_E5XEX6	1262	0	0.704414	2.20076e-15	0.455867	0.455867	0.343188	0.568545	1.07659e-12
UniRef90_E5XH18	1262	0	0.620703	2.20467e-15	0.455939	0.455939	0.34324	0.568639	1.07786e-12
UniRef90_E5XI49	1262	0.000169976	0.436921	2.20691e-15	0.456103	0.456103	0.343361	0.568845	1.0783e-12
UniRef90_A0A173ZEA5	1262	0	0.73521	2.2254e-15	0.455761	0.455761	0.343089	0.568433	1.08668e-12
UniRef90_E5XE62	1262	0	0.760395	2.2383e-15	0.455697	0.455697	0.34303	0.568364	1.09232e-12
UniRef90_E5XJ02	1262	0	0.628087	2.24784e-15	0.455782	0.455782	0.343087	0.568477	1.09632e-12
UniRef90_A5KPV4	1262	0	0.538275	2.25182e-15	0.455857	0.455857	0.34314	0.568574	1.0976e-12
UniRef90_A0A174ALU8	1262	0	0.483475	2.26323e-15	0.455858	0.455858	0.343132	0.568583	1.10192e-12
UniRef90_A5KPK2	1262	0	0.722576	2.26338e-15	0.455649	0.455649	0.342974	0.568323	1.10192e-12
UniRef90_E5XJG5	1262	0	0.608609	2.26722e-15	0.455747	0.455747	0.343045	0.568448	1.10313e-12
UniRef90_A0A173XR30	1262	0	0.532637	2.27251e-15	0.4558	0.4558	0.343081	0.568519	1.10504e-12
UniRef90_A0A174DEE3	1262	0	0.645111	2.27622e-15	0.455688	0.455688	0.342994	0.568382	1.10618e-12
UniRef90_E5XGQ2	1262	0	0.728392	2.29552e-15	0.455527	0.455527	0.342858	0.568196	1.11489e-12
UniRef90_F3AYK1	1262	0	0.758585	2.30098e-15	0.45551	0.45551	0.342841	0.568179	1.11688e-12
UniRef90_E5XII6	1262	0	0.719785	2.30498e-15	0.455539	0.455539	0.34286	0.568219	1.11815e-12
UniRef90_E5XDK2	1262	0	0.468471	2.30901e-15	0.455723	0.455723	0.342995	0.568451	1.11943e-12
UniRef90_E5XK62	1262	0	0.599356	2.32059e-15	0.455579	0.455579	0.342878	0.568281	1.12438e-12
UniRef90_A5KNU7	1262	0.00142308	0.473888	2.32263e-15	0.455697	0.455697	0.342965	0.568429	1.1247e-12
UniRef90_F7JPC0	1262	0	0.854976	2.3281e-15	0.455287	0.455287	0.342653	0.567922	1.12668e-12
UniRef90_A0A173ZAS8	1262	0	0.865593	2.33322e-15	0.455251	0.455251	0.342621	0.56788	1.12848e-12
UniRef90_A0A173ZKS4	1262	0	0.761239	2.33588e-15	0.455394	0.455394	0.342727	0.56806	1.12909e-12
UniRef90_A5KLQ9	1262	0	0.594455	2.35061e-15	0.455507	0.455507	0.342801	0.568213	1.13554e-12
UniRef90_A5KKS1	1262	0	0.664856	2.35283e-15	0.455429	0.455429	0.342741	0.568117	1.13593e-12
UniRef90_A0A174C318	1262	0	0.847787	2.36506e-15	0.455195	0.455195	0.342555	0.567834	1.14116e-12
UniRef90_E5XD89	1262	0	0.705983	2.3695e-15	0.455332	0.455332	0.342655	0.568009	1.14262e-12
UniRef90_A0A173YAL5	1262	0	0.656756	2.37521e-15	0.455361	0.455361	0.342673	0.56805	1.1447e-12
UniRef90_A0A174FES5	1262	0	0.664907	2.41874e-15	0.455219	0.455219	0.342534	0.567905	1.1643e-12
UniRef90_E5XIV6	1262	0	0.727179	2.41852e-15	0.45517	0.45517	0.342497	0.567843	1.1643e-12
UniRef90_A0A173ZGS2	1262	0	0.650067	2.42214e-15	0.455218	0.455218	0.342531	0.567906	1.16525e-12
UniRef90_E5XK43	1262	0	0.739304	2.42426e-15	0.455136	0.455136	0.342467	0.567805	1.16558e-12
UniRef90_R5AAA3	1262	0	0.881239	2.42914e-15	0.455038	0.455038	0.34239	0.567686	1.16723e-12
UniRef90_E5XJ36	1262	0	0.734866	2.43223e-15	0.455118	0.455118	0.342448	0.567788	1.16802e-12
UniRef90_A0A174ECI9	1262	0	0.580095	2.43877e-15	0.455219	0.455219	0.342519	0.567918	1.17047e-12
UniRef90_R5QGF5	1262	0	0.525208	2.44077e-15	0.455285	0.455285	0.342567	0.568002	1.17074e-12
UniRef90_A5KLS8	1262	0	0.788873	2.45317e-15	0.455007	0.455007	0.342349	0.567665	1.176e-12
UniRef90_E5XIL7	1262	0	0.612172	2.46491e-15	0.455119	0.455119	0.342425	0.567813	1.18093e-12
UniRef90_E5XDK3	1262	0	0.803813	2.48096e-15	0.454876	0.454876	0.342231	0.567522	1.18722e-12
UniRef90_F3AUG3	1262	4.73584	0.620826	2.48097e-15	0.475446	0.475446	0.357707	0.593186	1.18722e-12
UniRef90_A0A174B1N2	1262	0	0.694839	2.48999e-15	0.454992	0.454992	0.342312	0.567673	1.19083e-12
UniRef90_A5KIV4	1262	0	0.791454	2.49907e-15	0.45486	0.45486	0.342206	0.567514	1.1937e-12
UniRef90_E5XJ12	1262	0.00400579	0.338977	2.49984e-15	0.455312	0.455312	0.342546	0.568079	1.1937e-12
UniRef90_R5QL50	1262	0	0.602922	2.50039e-15	0.455038	0.455038	0.342339	0.567737	1.1937e-12
UniRef90_E5XDD9	1262	0.000855751	0.549278	2.52311e-15	0.455002	0.455002	0.342296	0.567709	1.20384e-12
UniRef90_A0A173YFY5	1262	0	0.659689	2.53026e-15	0.454895	0.454895	0.34221	0.56758	1.20654e-12
UniRef90_E5XI50	1262	0.7902	0.508952	2.54197e-15	0.458464	0.458464	0.344887	0.572041	1.21142e-12
UniRef90_A0A174CQ00	1262	0	0.552084	2.55335e-15	0.454927	0.454927	0.342218	0.567636	1.21613e-12
UniRef90_A0A174C4M7	1262	0.00369241	0.460238	2.55665e-15	0.455056	0.455056	0.342313	0.5678	1.21698e-12
UniRef90_E5XK58	1262	0	0.78117	2.55867e-15	0.454694	0.454694	0.342039	0.567349	1.21723e-12
UniRef90_A0A174DES1	1262	0	0.686586	2.5645e-15	0.454761	0.454761	0.342086	0.567437	1.21866e-12
UniRef90_E0E5D1	1262	0	0.989642	2.56467e-15	0.454373	0.454373	0.341793	0.566952	1.21866e-12
UniRef90_A0A174BK63	1262	0	0.767349	2.57228e-15	0.45467	0.45467	0.342011	0.567328	1.22156e-12
UniRef90_A0A174DR93	1262	0.00424763	0.372381	2.57483e-15	0.455057	0.455057	0.342301	0.567813	1.22206e-12
UniRef90_E5XHT2	1262	0.00525257	0.408339	2.58356e-15	0.455	0.455	0.342252	0.567748	1.22549e-12
UniRef90_E5XHK7	1262	8.74893	0.539317	2.58732e-15	0.49214	0.49214	0.370186	0.614094	1.22655e-12
UniRef90_E5XJ20	1262	0	0.578757	2.59008e-15	0.454785	0.454785	0.342086	0.567485	1.22715e-12
UniRef90_A0A173XTJ6	1262	0	0.885102	2.63669e-15	0.454363	0.454363	0.341737	0.566989	1.2485e-12
UniRef90_E5XEU8	1262	0	0.594831	2.63936e-15	0.454637	0.454637	0.341941	0.567332	1.24904e-12
UniRef90_E5XJM8	1262	0	0.892712	2.66231e-15	0.454289	0.454289	0.341664	0.566913	1.25916e-12
UniRef90_A0A173YWQ5	1262	0	0.55566	2.67656e-15	0.454581	0.454581	0.341874	0.567288	1.26483e-12
UniRef90_E1KMZ8	1262	4.53832	0.758461	2.6774e-15	0.473967	0.473967	0.356453	0.59148	1.26483e-12
UniRef90_E5XJ48	1262	0.0069924	0.485366	2.6793e-15	0.454654	0.454654	0.341927	0.567381	1.26499e-12
UniRef90_A0A173ZY15	1262	0	0.726281	2.68167e-15	0.45441	0.45441	0.341742	0.567077	1.26537e-12
UniRef90_A5KRA7	1262	0	0.617728	2.69138e-15	0.45448	0.45448	0.341788	0.567172	1.26922e-12
UniRef90_A0A0E9F8C7	1262	0	0.829024	2.73119e-15	0.454163	0.454163	0.341524	0.566802	1.28725e-12
UniRef90_E5XIT4	1262	0.00479101	0.451144	2.74653e-15	0.454512	0.454512	0.341777	0.567248	1.29373e-12
UniRef90_A5KNV2	1262	0	0.617916	2.75711e-15	0.454297	0.454297	0.341608	0.566986	1.29796e-12
UniRef90_A5KJL0	1262	0	0.774156	2.76101e-15	0.454135	0.454135	0.341483	0.566786	1.29904e-12
UniRef90_E5XJL7	1262	0	0.614175	2.77806e-15	0.454235	0.454235	0.341548	0.566923	1.30631e-12
UniRef90_A0A173YWU6	1262	0	0.863841	2.78619e-15	0.453974	0.453974	0.341347	0.566602	1.30937e-12
UniRef90_A0A173Z9D2	1262	0	0.648143	2.85706e-15	0.453986	0.453986	0.34131	0.566661	1.34164e-12
UniRef90_A5KN42	1262	0.00118088	0.546445	2.85816e-15	0.454087	0.454087	0.341386	0.566788	1.34164e-12
UniRef90_A0A174DZU3	1262	0	0.597257	2.87576e-15	0.454028	0.454028	0.341331	0.566726	1.34913e-12
UniRef90_E5XDK7	1262	0.0122898	0.404145	2.87916e-15	0.454233	0.454233	0.341482	0.566983	1.34994e-12
UniRef90_R5AD33	1262	0	0.8736	2.8987e-15	0.453738	0.453738	0.341099	0.566378	1.35832e-12
UniRef90_A0A174AMZ7	1262	0	0.562496	2.92347e-15	0.45392	0.45392	0.34122	0.56662	1.36913e-12
UniRef90_E5XK03	1262	0	0.852693	2.93246e-15	0.453605	0.453605	0.340978	0.566232	1.37256e-12
UniRef90_R5QYY6	1262	0	0.585396	2.93517e-15	0.453875	0.453875	0.34118	0.566571	1.37303e-12
UniRef90_A0A0X1U7D3	1262	0	0.990427	2.94453e-15	0.453357	0.453357	0.340784	0.56593	1.37662e-12
UniRef90_E5XJK7	1262	0	0.713077	2.95746e-15	0.453694	0.453694	0.34103	0.566358	1.38133e-12
UniRef90_R5ADM9	1262	0	0.89226	2.958e-15	0.453565	0.453565	0.340932	0.566197	1.38133e-12
UniRef90_A0A174ANB8	1262	0	0.780705	2.96361e-15	0.453607	0.453607	0.34096	0.566253	1.38146e-12
UniRef90_E5XFJ7	1262	0	0.70806	2.96413e-15	0.453672	0.453672	0.341009	0.566335	1.38146e-12
UniRef90_E5XHP4	1262	0	0.997003	2.96292e-15	0.453212	0.453212	0.340664	0.56576	1.38146e-12
UniRef90_Q8RHX1	1262	0	0.987639	2.96508e-15	0.453306	0.453306	0.340734	0.565879	1.38146e-12
UniRef90_A0A396NSF0	1262	0.00503234	0.351878	2.99172e-15	0.454103	0.454103	0.341317	0.56689	1.39307e-12
UniRef90_A0A174B470	1262	0	0.95387	2.99476e-15	0.45333	0.45333	0.340734	0.565926	1.39369e-12
UniRef90_E5XHL5	1262	0	0.723783	3.00426e-15	0.45358	0.45358	0.340916	0.566243	1.39731e-12
UniRef90_A5KQ12	1262	0	0.756806	3.01848e-15	0.453499	0.453499	0.340847	0.566151	1.40295e-12
UniRef90_R7B918	1262	0.00165922	0.615051	3.01984e-15	0.453729	0.453729	0.341019	0.566439	1.40295e-12
UniRef90_A0A174EBN7	1262	0.0135128	0.516954	3.02625e-15	0.453738	0.453738	0.341022	0.566454	1.40512e-12
UniRef90_A5KLW5	1262	0	0.70205	3.04098e-15	0.453504	0.453504	0.340837	0.56617	1.41116e-12
UniRef90_E5XDN7	1262	0	0.817513	3.05568e-15	0.453339	0.453339	0.340705	0.565973	1.41717e-12
UniRef90_A0A1L5KF47	1262	0	0.630105	3.05984e-15	0.453527	0.453527	0.340844	0.566211	1.41748e-12
UniRef90_E5XHM5	1262	0	0.494805	3.05926e-15	0.453661	0.453661	0.340944	0.566377	1.41748e-12
UniRef90_A5KK27	1262	0	0.601541	3.06695e-15	0.453523	0.453523	0.340837	0.56621	1.41996e-12
UniRef90_A5KKW5	1262	0	0.648724	3.06932e-15	0.453487	0.453487	0.340808	0.566166	1.42025e-12
UniRef90_E5XJ14	1262	0	0.67085	3.07962e-15	0.453456	0.453456	0.340779	0.566133	1.42421e-12
UniRef90_E5XDD0	1262	0	0.644588	3.09187e-15	0.453445	0.453445	0.340763	0.566127	1.42752e-12
UniRef90_F3AYQ7	1262	0	0.651018	3.0917e-15	0.453428	0.453428	0.340751	0.566105	1.42752e-12
UniRef90_R6ER97	1262	0	0.464469	3.09206e-15	0.453607	0.453607	0.340885	0.566329	1.42752e-12
UniRef90_G9RQH4	1262	0.00695897	0.303589	3.11871e-15	0.453787	0.453787	0.341005	0.566569	1.43901e-12
UniRef90_A5KJF2	1262	0	0.841299	3.12264e-15	0.453163	0.453163	0.340533	0.565792	1.44e-12
UniRef90_F3AXP7	1262	0	0.662251	3.14168e-15	0.4533	0.4533	0.340626	0.565974	1.44796e-12
UniRef90_A0A173ZIR0	1262	0.00108261	0.409794	3.162e-15	0.453476	0.453476	0.340746	0.566205	1.45611e-12
UniRef90_E5XID5	1262	0	0.834728	3.16293e-15	0.453074	0.453074	0.340444	0.565704	1.45611e-12
UniRef90_A0A174DH60	1262	0	0.741698	3.19162e-15	0.45311	0.45311	0.340455	0.565765	1.46848e-12
UniRef90_A5KLV7	1262	0	0.543373	3.19591e-15	0.45329	0.45329	0.340588	0.565992	1.46962e-12
UniRef90_E5XJB0	1262	0	0.669591	3.23573e-15	0.453078	0.453078	0.340407	0.56575	1.48709e-12
UniRef90_E5XF62	1262	0	0.663236	3.26569e-15	0.453014	0.453014	0.340342	0.565687	1.50001e-12
UniRef90_A0A174C523	1262	0	0.541427	3.27488e-15	0.453106	0.453106	0.340406	0.565806	1.50338e-12
UniRef90_A0A173XJV0	1262	0	0.539709	3.2945e-15	0.453056	0.453056	0.340358	0.565754	1.51153e-12
UniRef90_E5XJ73	1262	0	0.800447	3.30436e-15	0.452784	0.452784	0.340148	0.56542	1.51521e-12
UniRef90_E5XEU7	1262	0.00458923	0.598447	3.30765e-15	0.452981	0.452981	0.340294	0.565668	1.51586e-12
UniRef90_A0A174CQE1	1262	0.00937907	0.48633	3.31315e-15	0.453094	0.453094	0.340376	0.565812	1.51752e-12
UniRef90_E5XEE5	1262	0	0.550282	3.32114e-15	0.45298	0.45298	0.340287	0.565674	1.52032e-12
UniRef90_R5AJ83	1262	0	0.768562	3.36703e-15	0.452769	0.452769	0.340103	0.565434	1.54046e-12
UniRef90_A0A174BH92	1262	0	0.557042	3.37455e-15	0.452863	0.452863	0.34017	0.565556	1.54217e-12
UniRef90_E5XJ30	1262	0.00369977	0.494506	3.37338e-15	0.452939	0.452939	0.340228	0.565651	1.54217e-12
UniRef90_E5XEY4	1262	0	0.823986	3.38067e-15	0.452606	0.452606	0.339973	0.565238	1.54409e-12
UniRef90_A5KNG1	1262	0	0.703602	3.39633e-15	0.452686	0.452686	0.340025	0.565347	1.55038e-12
UniRef90_G9RW08	1262	0	0.511784	3.39932e-15	0.45291	0.45291	0.340192	0.565628	1.55087e-12
UniRef90_A0A173XBP3	1262	0	0.757546	3.40934e-15	0.452601	0.452601	0.339955	0.565248	1.55457e-12
UniRef90_A0A0D8IXP5	1262	0.00225201	0.333946	3.41349e-15	0.453066	0.453066	0.340302	0.56583	1.55473e-12
UniRef90_E5XGY1	1262	0	0.631643	3.41352e-15	0.452709	0.452709	0.340034	0.565385	1.55473e-12
UniRef90_E5XJ05	1262	0	0.779243	3.4623e-15	0.452466	0.452466	0.339826	0.565107	1.57606e-12
UniRef90_E5XHJ0	1262	3.62969	0.612599	3.46704e-15	0.468217	0.468217	0.351653	0.584781	1.57734e-12
UniRef90_A0A174A596	1262	0	0.519453	3.48484e-15	0.45266	0.45266	0.33996	0.56536	1.58366e-12
UniRef90_A5KPE4	1262	0	0.468293	3.48394e-15	0.452721	0.452721	0.340006	0.565435	1.58366e-12
UniRef90_A0A173ZEU9	1262	0	0.552707	3.48741e-15	0.452637	0.452637	0.339941	0.565332	1.58395e-12
UniRef90_A0A174D6U6	1262	0	0.481282	3.49681e-15	0.45268	0.45268	0.339969	0.565392	1.58733e-12
UniRef90_E5XK44	1262	1.08588	0.575211	3.50596e-15	0.457286	0.457286	0.343423	0.571148	1.59059e-12
UniRef90_E5XEQ2	1202	0	0.931538	3.5214e-15	0.463711	0.463711	0.34824	0.579182	1.59671e-12
UniRef90_A5KLR9	1262	0	0.816558	3.56504e-15	0.452233	0.452233	0.339598	0.564867	1.61559e-12
UniRef90_A5KLQ4	1262	0	0.813155	3.56818e-15	0.452224	0.452224	0.33959	0.564858	1.61611e-12
UniRef90_A5KMU9	1262	0	0.682731	3.58367e-15	0.452303	0.452303	0.339642	0.564965	1.62222e-12
UniRef90_A0A174ABN4	1262	0	0.543637	3.58916e-15	0.452421	0.452421	0.339727	0.565114	1.6238e-12
UniRef90_A0A174ET57	1262	0	0.808262	3.60115e-15	0.452149	0.452149	0.339518	0.564781	1.62832e-12
UniRef90_A0A173ZFP4	1262	0	0.720095	3.61468e-15	0.452209	0.452209	0.339556	0.564862	1.63353e-12
UniRef90_F3AXC9	1262	0	0.824569	3.63533e-15	0.452064	0.452064	0.339436	0.564691	1.64195e-12
UniRef90_A5KPD5	1262	0	0.654208	3.7055e-15	0.452075	0.452075	0.33941	0.564739	1.67272e-12
UniRef90_E5XJY2	1262	0	0.550242	3.74291e-15	0.452128	0.452128	0.339432	0.564824	1.68866e-12
UniRef90_E5XJJ1	1262	0	0.767799	3.77278e-15	0.451843	0.451843	0.339204	0.564482	1.70119e-12
UniRef90_A0A173ZUW9	1262	0	0.919619	3.77846e-15	0.451654	0.451654	0.339059	0.564248	1.70281e-12
UniRef90_A0A174DDN9	1262	0.0194602	0.435866	3.78096e-15	0.452224	0.452224	0.339486	0.564961	1.703e-12
UniRef90_A5KKV1	1262	0	0.668166	3.82138e-15	0.45183	0.45183	0.339172	0.564489	1.72025e-12
UniRef90_E5XI43	1262	0	0.670223	3.84055e-15	0.451815	0.451815	0.339151	0.564479	1.72792e-12
UniRef90_E5XDF9	1262	0	0.577316	3.84928e-15	0.451865	0.451865	0.339185	0.564546	1.73089e-12
UniRef90_A0A174CKS9	1262	0	0.748983	3.85511e-15	0.451695	0.451695	0.339054	0.564335	1.73255e-12
UniRef90_A0A174C1P0	1262	0	0.864422	3.87389e-15	0.451547	0.451547	0.338935	0.56416	1.74003e-12
UniRef90_E5XHP7	1262	0	0.569384	3.88572e-15	0.451821	0.451821	0.339135	0.564508	1.74438e-12
UniRef90_E5XJN4	1262	0	0.554986	3.90069e-15	0.451812	0.451812	0.339121	0.564503	1.75013e-12
UniRef90_E5XJE0	1262	0	0.41392	3.91499e-15	0.451907	0.451907	0.339186	0.564629	1.75558e-12
UniRef90_A0A173ZPA6	1262	0	0.863032	3.92299e-15	0.451467	0.451467	0.338852	0.564082	1.75819e-12
UniRef90_E5XFV6	1262	0	0.624926	3.93096e-15	0.451707	0.451707	0.339028	0.564386	1.76003e-12
UniRef90_E5XHL3	1262	0	0.80979	3.93143e-15	0.451494	0.451494	0.338868	0.56412	1.76003e-12
UniRef90_A0A0D8J287	1262	0.00533607	0.283259	3.95373e-15	0.4521	0.4521	0.339313	0.564888	1.76904e-12
UniRef90_A5KKP2	1262	0.645776	0.520364	3.96521e-15	0.454531	0.454531	0.341132	0.56793	1.7732e-12
UniRef90_G9RQ52	1262	0.00249767	0.199969	3.97905e-15	0.452143	0.452143	0.339334	0.564953	1.77841e-12
UniRef90_E5XFA1	1262	0	0.8196	4.03971e-15	0.451281	0.451281	0.33866	0.563903	1.80454e-12
UniRef90_A0A174CJ06	1262	0	0.590219	4.04955e-15	0.451481	0.451481	0.338805	0.564156	1.80794e-12
UniRef90_A0A0D8IVT6	1262	0.00204577	0.366484	4.05247e-15	0.451783	0.451783	0.339031	0.564535	1.80825e-12
UniRef90_A5KJF0	1262	1.82746	0.595331	4.06446e-15	0.459344	0.459344	0.344699	0.573989	1.8126e-12
UniRef90_R5ABX3	1262	0	0.834853	4.06687e-15	0.451308	0.451308	0.338667	0.563948	1.81268e-12
UniRef90_A0A173ZCY5	1262	0.00116425	0.416635	4.0778e-15	0.451609	0.451609	0.338889	0.56433	1.81656e-12
UniRef90_E5XE36	1262	0	0.778766	4.08308e-15	0.451264	0.451264	0.338627	0.5639	1.81791e-12
UniRef90_A0A173ZI76	1262	0	0.731669	4.13678e-15	0.451195	0.451195	0.338552	0.563838	1.84081e-12
UniRef90_A0A174DNT3	1262	0	0.584152	4.1607e-15	0.451295	0.451295	0.338617	0.563973	1.8498e-12
UniRef90_R5A7T2	1262	0	0.648664	4.16153e-15	0.451322	0.451322	0.338637	0.564007	1.8498e-12
UniRef90_A5KP67	1262	0	0.727598	4.16803e-15	0.451157	0.451157	0.33851	0.563803	1.85167e-12
UniRef90_A0A174EDQ3	1262	0	0.693747	4.18837e-15	0.451147	0.451147	0.338494	0.5638	1.85868e-12
UniRef90_E5XE40	1262	0	0.852636	4.1869e-15	0.450998	0.450998	0.338383	0.563614	1.85868e-12
UniRef90_A0A0W7TTB6	1262	0.0118568	0.470178	4.20431e-15	0.451455	0.451455	0.338718	0.564192	1.86372e-12
UniRef90_A0A173Z2P8	1262	0	0.612152	4.20304e-15	0.45119	0.45119	0.33852	0.56386	1.86372e-12
UniRef90_E5XET1	1262	0.000232547	0.498239	4.31425e-15	0.451104	0.451104	0.338408	0.5638	1.91141e-12
UniRef90_A5KP07	1262	0	0.780266	4.31757e-15	0.450839	0.450839	0.338208	0.563469	1.91184e-12
UniRef90_A5KL98	1262	0	0.619356	4.32934e-15	0.450954	0.450954	0.33829	0.563619	1.916e-12
UniRef90_E5XHW3	1262	0	0.706018	4.34872e-15	0.450848	0.450848	0.338202	0.563495	1.92353e-12
UniRef90_E5XEU2	1262	0	0.594764	4.3524e-15	0.450957	0.450957	0.338282	0.563631	1.92411e-12
UniRef90_A0A174D479	1262	0.00528693	0.542553	4.37908e-15	0.450967	0.450967	0.338279	0.563655	1.93485e-12
UniRef90_A0A174CET8	1262	0	0.580543	4.38442e-15	0.450915	0.450915	0.338238	0.563593	1.93616e-12
UniRef90_A0A174A3B5	1262	0	0.76798	4.38837e-15	0.450729	0.450729	0.338096	0.563361	1.93617e-12
UniRef90_E5XHP2	1262	0	0.692491	4.38919e-15	0.45078	0.45078	0.338134	0.563425	1.93617e-12
UniRef90_A5KJW8	1262	0	0.685715	4.41579e-15	0.450753	0.450753	0.338103	0.563403	1.94684e-12
UniRef90_A0A174CHN5	1262	0	0.513349	4.41843e-15	0.450912	0.450912	0.338221	0.563603	1.94695e-12
UniRef90_E5XES3	1262	0.00463689	0.507892	4.42838e-15	0.450903	0.450903	0.338211	0.563596	1.95028e-12
UniRef90_R5AJ72	1262	0	0.663202	4.44392e-15	0.450828	0.450828	0.338148	0.563508	1.95606e-12
UniRef90_E5XHZ7	1262	0	0.718857	4.45294e-15	0.450674	0.450674	0.338029	0.563319	1.95897e-12
UniRef90_E5XHX7	1262	0	0.889129	4.46623e-15	0.450464	0.450464	0.337866	0.563063	1.96375e-12
UniRef90_E7NSS8	1262	0	0.927705	4.53331e-15	0.450304	0.450304	0.337719	0.562889	1.99217e-12
UniRef90_A5KPG1	1262	2.21013	0.537607	4.58634e-15	0.460099	0.460099	0.345043	0.575154	2.01438e-12
UniRef90_E5XEI3	1262	0	0.540961	4.63391e-15	0.450546	0.450546	0.337861	0.563231	2.03418e-12
UniRef90_F3ARX2	1262	0	0.785401	4.6593e-15	0.450279	0.450279	0.33765	0.562907	2.04422e-12
UniRef90_A0A174B3E5	1262	0	0.636871	4.66276e-15	0.450406	0.450406	0.337745	0.563067	2.04463e-12
UniRef90_E5XJY7	1262	0	0.847722	4.67061e-15	0.450198	0.450198	0.337586	0.562811	2.04697e-12
UniRef90_A0A174CLE9	1262	0	0.882889	4.68509e-15	0.450125	0.450125	0.337525	0.562724	2.05221e-12
UniRef90_A5KIU8	1262	0	0.646239	4.6987e-15	0.450346	0.450346	0.337686	0.563006	2.05706e-12
UniRef90_E5XH46	1262	0	0.603883	4.70977e-15	0.450359	0.450359	0.337692	0.563027	2.0608e-12
UniRef90_R5AES3	1262	0	0.724336	4.73866e-15	0.450286	0.450286	0.337626	0.562947	2.07232e-12
UniRef90_E5XE52	1202	0	0.611204	4.74827e-15	0.461783	0.461783	0.346242	0.577323	2.07541e-12
UniRef90_E5XID7	1262	0	0.652951	4.75394e-15	0.450238	0.450238	0.337584	0.562893	2.07677e-12
UniRef90_A0A174E6P7	1262	0	0.816268	4.81495e-15	0.450002	0.450002	0.337383	0.56262	2.10116e-12
UniRef90_R5XM92	1262	0	0.69102	4.81474e-15	0.450118	0.450118	0.337471	0.562765	2.10116e-12
UniRef90_E5XK15	1262	0	0.746029	4.83648e-15	0.450026	0.450026	0.337394	0.562659	2.10942e-12
UniRef90_A5KPJ8	1262	0	0.75187	4.8709e-15	0.449977	0.449977	0.337344	0.56261	2.1233e-12
UniRef90_E5XFG4	1262	0	0.753446	4.88089e-15	0.44996	0.44996	0.337327	0.562592	2.12651e-12
UniRef90_A0A174CWG2	1262	0	0.611582	4.89782e-15	0.450054	0.450054	0.337391	0.562716	2.13274e-12
UniRef90_A0A173ZBN1	1262	0	0.621553	4.90378e-15	0.450037	0.450037	0.337377	0.562697	2.1342e-12
UniRef90_E5XJF7	1262	0	0.479636	4.93942e-15	0.450124	0.450124	0.337429	0.562819	2.14855e-12
UniRef90_A0A0D8J2E5	1262	0.0140782	0.229192	5.00633e-15	0.450422	0.450422	0.337628	0.563216	2.17649e-12
UniRef90_A5KQ03	1262	0	0.742329	5.04671e-15	0.449711	0.449711	0.337081	0.562342	2.19288e-12
UniRef90_E5XI28	1262	0	0.644597	5.09849e-15	0.449743	0.449743	0.337086	0.562401	2.21419e-12
UniRef90_E5XI39	1262	0	0.750668	5.10934e-15	0.449618	0.449618	0.336988	0.562248	2.21772e-12
UniRef90_A5KPC8	1262	3.3848	0.332733	5.11701e-15	0.464416	0.464416	0.348077	0.580756	2.21986e-12
UniRef90_E5XFL0	1262	0	0.669431	5.13559e-15	0.449654	0.449654	0.337006	0.562302	2.22673e-12
UniRef90_A5KPR8	1262	0	0.729986	5.17263e-15	0.449543	0.449543	0.33691	0.562176	2.2416e-12
UniRef90_A0A173YS52	1262	0	0.732653	5.21478e-15	0.4495	0.4495	0.336863	0.562137	2.25862e-12
UniRef90_A0A174DDC3	1262	0.00147001	0.478629	5.21747e-15	0.449716	0.449716	0.337024	0.562408	2.25862e-12
UniRef90_E5XG81	1262	0	0.822513	5.25485e-15	0.44933	0.44933	0.336722	0.561938	2.27359e-12
UniRef90_E5XGX9	1262	0	0.559054	5.26654e-15	0.449574	0.449574	0.336901	0.562248	2.27744e-12
UniRef90_E5XJB5	1262	0	0.76433	5.2724e-15	0.44937	0.44937	0.336745	0.561994	2.27876e-12
UniRef90_R5R1Q5	1262	0	0.616102	5.29221e-15	0.449479	0.449479	0.336821	0.562138	2.2861e-12
UniRef90_F3ATK1	1262	0	0.525381	5.31965e-15	0.449531	0.449531	0.33685	0.562212	2.29673e-12
UniRef90_A0A174B231	1202	0	0.755646	5.32642e-15	0.46076	0.46076	0.345262	0.576258	2.29787e-12
UniRef90_A0A174CWL2	1262	0	0.845735	5.32794e-15	0.44922	0.44922	0.336614	0.561825	2.29787e-12
UniRef90_E5XD99	1262	0	0.568214	5.34479e-15	0.449452	0.449452	0.336782	0.562122	2.30392e-12
UniRef90_A0A173YIY3	1262	0	0.650946	5.35802e-15	0.449351	0.449351	0.336702	0.562	2.3084e-12
UniRef90_A0A174ESL5	1262	0	0.745503	5.36844e-15	0.449276	0.449276	0.336643	0.56191	2.31166e-12
UniRef90_E5XED5	1262	0	0.670986	5.38641e-15	0.449289	0.449289	0.336646	0.561932	2.31817e-12
UniRef90_E5XGY5	1262	0	0.792237	5.39302e-15	0.449192	0.449192	0.336571	0.561813	2.31978e-12
UniRef90_E5XI48	1262	0	0.92977	5.42345e-15	0.448965	0.448965	0.336391	0.561538	2.33164e-12
UniRef90_A0A174DGG0	1262	0.00732271	0.472867	5.42793e-15	0.449456	0.449456	0.336758	0.562155	2.33233e-12
UniRef90_A0A174F126	1262	1.74049	0.592729	5.43283e-15	0.456807	0.456807	0.342263	0.57135	2.3332e-12
UniRef90_A5KQK2	1262	0	0.550899	5.44557e-15	0.44934	0.44934	0.336665	0.562016	2.33744e-12
UniRef90_A5KJN2	1262	0	0.675943	5.44912e-15	0.449215	0.449215	0.33657	0.56186	2.33773e-12
UniRef90_A5KPE5	1262	0	0.728804	5.45922e-15	0.449141	0.449141	0.336511	0.561771	2.34082e-12
UniRef90_A0A0D8J1J7	1262	0.00305286	0.526857	5.58006e-15	0.449233	0.449233	0.33654	0.561926	2.39138e-12
UniRef90_A0A173X8X0	1262	0	0.845651	5.61932e-15	0.448812	0.448812	0.336212	0.561412	2.40566e-12
UniRef90_A0A173ZE15	1262	0	0.603451	5.6189e-15	0.449055	0.449055	0.336394	0.561716	2.40566e-12
UniRef90_E5XK40	1262	0	0.619369	5.73568e-15	0.448881	0.448881	0.336226	0.561535	2.45419e-12
UniRef90_E5XDQ9	1262	0	0.636105	5.75444e-15	0.448843	0.448843	0.336192	0.561494	2.46092e-12
UniRef90_A0A173ZI31	1262	0	0.645548	5.81756e-15	0.448742	0.448742	0.336096	0.561387	2.4853e-12
UniRef90_E5XHM8	1262	0	0.716456	5.81631e-15	0.448677	0.448677	0.336048	0.561306	2.4853e-12
UniRef90_R5QYZ0	1262	0	0.720767	5.84282e-15	0.448661	0.448661	0.336028	0.561294	2.49477e-12
UniRef90_A5KQC6	1262	0	0.653629	5.88615e-15	0.448674	0.448674	0.336024	0.561324	2.51196e-12
UniRef90_R5AA53	1262	0	0.63826	5.89754e-15	0.448747	0.448747	0.336076	0.561419	2.51549e-12
UniRef90_A5KLE7	1262	0	0.597418	5.92302e-15	0.448671	0.448671	0.336011	0.561332	2.52504e-12
UniRef90_A0A174D761	1262	0.00586531	0.365933	5.93318e-15	0.448904	0.448904	0.336182	0.561626	2.52804e-12
UniRef90_F3ATJ4	1262	0	0.507398	5.93895e-15	0.448733	0.448733	0.336052	0.561414	2.52917e-12
UniRef90_E5XDH1	1262	0.00478933	0.356931	6.00156e-15	0.448814	0.448814	0.336094	0.561534	2.5545e-12
UniRef90_A5KQ14	1262	0.001127	0.397439	6.07056e-15	0.448684	0.448684	0.335975	0.561392	2.58116e-12
UniRef90_F3AXB2	1262	0	0.795099	6.06886e-15	0.448297	0.448297	0.335687	0.560908	2.58116e-12
UniRef90_E5XHT7	1262	0	0.682492	6.13955e-15	0.448315	0.448315	0.335679	0.560952	2.60913e-12
UniRef90_E5XI64	1262	0	0.630432	6.14816e-15	0.448363	0.448363	0.335712	0.561014	2.61143e-12
UniRef90_E5XDK8	1262	0	0.884123	6.20034e-15	0.448054	0.448054	0.335465	0.560642	2.63221e-12
UniRef90_E5XGX7	1262	0	0.887619	6.25676e-15	0.447972	0.447972	0.335388	0.560557	2.65478e-12
UniRef90_A5KKL5	1262	0	0.506552	6.30029e-15	0.448287	0.448287	0.335611	0.560963	2.67185e-12
UniRef90_A0A174E5L7	1262	0	0.630372	6.3297e-15	0.448142	0.448142	0.335494	0.560791	2.68292e-12
UniRef90_E5XDR1	1262	0	0.837534	6.33534e-15	0.447932	0.447932	0.335335	0.560529	2.68392e-12
UniRef90_A0A174F2Q5	1262	1.9535	0.440285	6.35585e-15	0.456626	0.456626	0.341837	0.571414	2.6912e-12
UniRef90_E5XET2	1262	0	0.570157	6.37041e-15	0.44815	0.44815	0.335488	0.560812	2.69596e-12
UniRef90_A5KKD1	1262	0.0112772	0.311245	6.40466e-15	0.448431	0.448431	0.335688	0.561173	2.70905e-12
UniRef90_F3AVS3	1262	0	0.884701	6.42528e-15	0.447773	0.447773	0.33519	0.560356	2.71635e-12
UniRef90_A0A173ZT89	1262	5.37397	0.620245	6.56465e-15	0.470564	0.470564	0.352209	0.588918	2.77383e-12
UniRef90_A0A174DW54	1262	1.91972	0.287931	6.57138e-15	0.456434	0.456434	0.341631	0.571236	2.77523e-12
UniRef90_E5XEF1	1262	0	0.725156	6.57587e-15	0.447768	0.447768	0.335144	0.560393	2.77532e-12
UniRef90_R5A949	1262	0	0.829102	6.57842e-15	0.447746	0.447746	0.335127	0.560366	2.77532e-12
UniRef90_E5XK36	1262	0.00549298	0.39996	6.60639e-15	0.448059	0.448059	0.335353	0.560765	2.78567e-12
UniRef90_E5XHM0	1262	0	0.639528	6.64668e-15	0.447778	0.447778	0.335132	0.560425	2.80121e-12
UniRef90_A5KK10	1262	0	0.646292	6.65042e-15	0.447744	0.447744	0.335105	0.560382	2.80133e-12
UniRef90_A5KP54	1262	0	0.643775	6.66111e-15	0.447755	0.447755	0.335111	0.560399	2.80438e-12
UniRef90_A0A173ZEA3	1262	0	0.734901	6.66584e-15	0.447667	0.447667	0.335043	0.56029	2.80492e-12
UniRef90_E5XH41	1262	0	0.854005	6.718e-15	0.447469	0.447469	0.334881	0.560056	2.8254e-12
UniRef90_A5KQM4	1262	0	0.448644	6.7426e-15	0.44784	0.44784	0.335152	0.560527	2.83428e-12
UniRef90_E5XH38	1262	0	0.704073	6.75041e-15	0.447587	0.447587	0.334961	0.560213	2.8361e-12
UniRef90_C5NVE3	1156	0	0.897316	6.75574e-15	0.468122	0.468122	0.350327	0.585917	2.83687e-12
UniRef90_E7MMU0	1202	0	0.999952	6.82208e-15	0.458408	0.458408	0.343039	0.573777	2.86325e-12
UniRef90_A5KIX5	1262	0.00395026	0.49722	6.84665e-15	0.447681	0.447681	0.335005	0.560356	2.87208e-12
UniRef90_E5XF70	1262	0	0.696708	6.88215e-15	0.44746	0.44746	0.33483	0.56009	2.88548e-12
UniRef90_A5KK72	1262	0.0126334	0.415971	6.89022e-15	0.447742	0.447742	0.335039	0.560445	2.88737e-12
UniRef90_A5KQJ4	1262	0	0.846653	7.03169e-15	0.447147	0.447147	0.334557	0.559737	2.94514e-12
UniRef90_E5XDE5	1262	0	0.671493	7.05291e-15	0.44729	0.44729	0.334658	0.559922	2.9525e-12
UniRef90_A0A173Z2Z1	1262	0	0.810941	7.15225e-15	0.447046	0.447046	0.33445	0.559642	2.99255e-12
UniRef90_A5KMH3	1262	0	0.687663	7.21627e-15	0.44712	0.44712	0.334489	0.559751	3.01778e-12
UniRef90_E5XIU3	1262	0	0.867955	7.22496e-15	0.446925	0.446925	0.334341	0.559509	3.01986e-12
UniRef90_A5KQV1	1262	0	0.731179	7.24459e-15	0.447041	0.447041	0.334423	0.559659	3.02651e-12
UniRef90_A0A174AR41	1262	0	0.802012	7.26504e-15	0.446955	0.446955	0.334354	0.559557	3.03349e-12
UniRef90_A0A0D8J1H5	1262	0.0181204	0.499697	7.32079e-15	0.447316	0.447316	0.334609	0.560022	3.0552e-12
UniRef90_E5XI80	1262	0	0.814221	7.37908e-15	0.446826	0.446826	0.334229	0.559424	3.07794e-12
UniRef90_A0A174C3G1	1262	0	0.688738	7.40944e-15	0.446916	0.446916	0.334288	0.559544	3.08725e-12
UniRef90_A5KIJ4	1262	0	0.742146	7.41278e-15	0.446863	0.446863	0.334247	0.559478	3.08725e-12
UniRef90_R6QAC4	1262	0	0.826803	7.41191e-15	0.446838	0.446838	0.334229	0.559446	3.08725e-12
UniRef90_R6EPZ4	1262	0.000223082	0.388174	7.43289e-15	0.447183	0.447183	0.334482	0.559883	3.09404e-12
UniRef90_E5XFK2	1262	0	0.70011	7.47984e-15	0.446829	0.446829	0.334206	0.559453	3.11199e-12
UniRef90_A0A173ZXZ8	1262	0	0.668463	7.5104e-15	0.446829	0.446829	0.334198	0.55946	3.1231e-12
UniRef90_E5XI53	1262	0	0.720522	7.51471e-15	0.446779	0.446779	0.33416	0.559398	3.1233e-12
UniRef90_E5XK12	1262	0	0.816624	7.55624e-15	0.446636	0.446636	0.334043	0.55923	3.13895e-12
UniRef90_C5NWB1	1156	0	0.921821	7.57261e-15	0.467169	0.467169	0.349395	0.584942	3.14414e-12
UniRef90_A0A173YA53	1262	0	0.930377	7.62576e-15	0.446439	0.446439	0.333878	0.558999	3.1646e-12
UniRef90_A5KJ28	1262	0	0.882803	7.66833e-15	0.44646	0.44646	0.333884	0.559036	3.18064e-12
UniRef90_G9RY41	1262	0.00275236	0.432692	7.67972e-15	0.446961	0.446961	0.334256	0.559666	3.18373e-12
UniRef90_A5KPF8	1262	0	0.9705	7.71801e-15	0.446263	0.446263	0.333725	0.558801	3.19797e-12
UniRef90_E5XFV7	1262	0	0.576896	7.7736e-15	0.446687	0.446687	0.334029	0.559345	3.21937e-12
UniRef90_C5NVA0	1156	0	0.950337	7.87261e-15	0.46684	0.46684	0.349075	0.584605	3.25871e-12
UniRef90_E7MN45	1202	0	0.944827	7.89847e-15	0.457516	0.457516	0.342096	0.572935	3.26775e-12
UniRef90_A0A174FFV0	1262	0	0.576875	7.91841e-15	0.446547	0.446547	0.33389	0.559204	3.27267e-12
UniRef90_A5KKA0	1262	0	0.772865	7.91733e-15	0.446348	0.446348	0.333742	0.558954	3.27267e-12
UniRef90_G9RNL3	1262	0.00228928	0.35267	7.98714e-15	0.446744	0.446744	0.334022	0.559467	3.2994e-12
UniRef90_A0A174A260	1262	0	0.80033	8.00806e-15	0.446214	0.446214	0.333621	0.558808	3.30503e-12
UniRef90_A0A174CWX1	1262	0.0226252	0.511799	8.00892e-15	0.446581	0.446581	0.333895	0.559267	3.30503e-12
UniRef90_F3ARX5	1262	0	0.857989	8.02632e-15	0.446153	0.446153	0.333571	0.558735	3.31053e-12
UniRef90_E5XHS2	1262	0	0.733633	8.05016e-15	0.44625	0.44625	0.333638	0.558862	3.31868e-12
UniRef90_E5XI30	1262	0	0.643244	8.12142e-15	0.446269	0.446269	0.333636	0.558902	3.34636e-12
UniRef90_A0A0D8J2Z7	1262	1.87153	0.383422	8.19537e-15	0.454497	0.454497	0.33977	0.569223	3.37512e-12
UniRef90_A5KKH2	1262	0	0.535954	8.22247e-15	0.446279	0.446279	0.33362	0.558937	3.38456e-12
UniRef90_A0A173ZZ79	1262	0	0.646322	8.22851e-15	0.446166	0.446166	0.333535	0.558797	3.38533e-12
UniRef90_E5XJ94	1262	0	0.765284	8.36271e-15	0.44593	0.44593	0.333329	0.558531	3.43881e-12
UniRef90_E5XHP0	1262	0	0.70419	8.40366e-15	0.445963	0.445963	0.333344	0.558581	3.4539e-12
UniRef90_E7MNU8	1202	0	0.99619	8.55614e-15	0.456772	0.456772	0.34139	0.572154	3.51479e-12
UniRef90_E5XFV5	1262	0	0.808665	8.61247e-15	0.445703	0.445703	0.333105	0.558301	3.53614e-12
UniRef90_E5XD68	1262	0	0.742829	8.66694e-15	0.445683	0.445683	0.333078	0.558287	3.55671e-12
UniRef90_A0A173YH60	1262	0	0.742337	8.68081e-15	0.445678	0.445678	0.333071	0.558284	3.5606e-12
UniRef90_A0A173ZJV0	1262	0	0.795979	8.76375e-15	0.445574	0.445574	0.332976	0.558171	3.59281e-12
UniRef90_A0A173YV88	1262	0	0.808567	8.87085e-15	0.445459	0.445459	0.332868	0.55805	3.63488e-12
UniRef90_A0A174CF08	1262	0	0.869984	8.93769e-15	0.445323	0.445323	0.332753	0.557893	3.66042e-12
UniRef90_A5KJK4	1262	0	0.737752	8.95384e-15	0.445456	0.445456	0.332848	0.558063	3.66519e-12
UniRef90_A0A174C5N5	1262	0	0.687611	8.96168e-15	0.445501	0.445501	0.332881	0.558121	3.66655e-12
UniRef90_A5KQL7	1262	0	0.534555	8.97066e-15	0.445641	0.445641	0.332983	0.558298	3.66838e-12
UniRef90_E0E4A9	1262	0	0.94781	9.00887e-15	0.445179	0.445179	0.33263	0.557727	3.68215e-12
UniRef90_A0A173Y903	1262	0	0.635087	9.03143e-15	0.445478	0.445478	0.33285	0.558107	3.68952e-12
UniRef90_E5XKD2	1262	0	0.709776	9.1368e-15	0.445336	0.445336	0.332722	0.55795	3.73068e-12
UniRef90_E5XK99	1262	0	0.750187	9.14245e-15	0.445282	0.445282	0.33268	0.557884	3.73111e-12
UniRef90_A5KLS1	1262	0	0.683099	9.16131e-15	0.44533	0.44533	0.332712	0.557947	3.73694e-12
UniRef90_E5XG80	1262	8.18263e-05	0.344135	9.17422e-15	0.44565	0.44565	0.332948	0.558351	3.74032e-12
UniRef90_E5XFS7	1262	0	0.712306	9.21708e-15	0.445264	0.445264	0.332652	0.557876	3.75592e-12
UniRef90_F3AXJ8	1262	0	0.666435	9.31604e-15	0.445219	0.445219	0.332599	0.55784	3.79434e-12
UniRef90_E5XIU6	1262	0	0.678476	9.36512e-15	0.445166	0.445166	0.332549	0.557783	3.81242e-12
UniRef90_A5KQ65	1262	2.35001	0.551625	9.43293e-15	0.455199	0.455199	0.34003	0.570367	3.8381e-12
UniRef90_A0A173YBV6	1262	0	0.618364	9.49857e-15	0.44512	0.44512	0.332489	0.557751	3.86287e-12
UniRef90_A5KQW2	1262	0	0.744075	9.55154e-15	0.444968	0.444968	0.332365	0.557572	3.88215e-12
[truncated: 810,546+ more rows]
