# Supplementary material for: Integrating taxonomic, functional, and strain-level profiling of diverse microbial communities with bioBakery 3
Source: eLife. 2021 May 4;10:e65088. doi: 10.7554/eLife.65088 (PMC8096432; doi:10.7554/eLife.65088)
Supplement: Supplementary file 9. [file elife-65088-supp9.xlsx]

## Sheet: Sheet1
tool	dataset	sample	TP	FP	FN	Precision	Recall	F1
MetaPhlAn v3.0 stat_q 0.2	Urogenital tract	6	12	4	3	0.75	0.8	0.774194
MetaPhlAn v3.0 stat_q 0.1	Urogenital tract	6	12	8	3	0.6	0.8	0.685714
MetaPhlAn2 v2.7	Urogenital tract	6	9	1	6	0.9	0.6	0.72
mOTUs251_precision	Urogenital tract	6	14	4	1	0.777778	0.933333	0.848485
mOTUs251_recall	Urogenital tract	6	14	6	1	0.7	0.933333	0.8
Bracken_208_25_refseq	Urogenital tract	6	15	33	0	0.3125	1	0.47619
MetaPhlAn v3.0 stat_q 0.2	Urogenital tract	5	24	0	1	1	0.96	0.979592
MetaPhlAn v3.0 stat_q 0.1	Urogenital tract	5	24	3	1	0.888889	0.96	0.923077
MetaPhlAn2 v2.7	Urogenital tract	5	17	3	8	0.85	0.68	0.755556
mOTUs251_precision	Urogenital tract	5	19	8	6	0.703704	0.76	0.730769
mOTUs251_recall	Urogenital tract	5	25	25	0	0.5	1	0.666667
Bracken_208_25_refseq	Urogenital tract	5	25	193	0	0.114679	1	0.205761
MetaPhlAn v3.0 stat_q 0.2	Urogenital tract	3	43	2	5	0.955556	0.895833	0.924731
MetaPhlAn v3.0 stat_q 0.1	Urogenital tract	3	44	5	4	0.897959	0.916667	0.907216
MetaPhlAn2 v2.7	Urogenital tract	3	31	5	17	0.861111	0.645833	0.738095
mOTUs251_precision	Urogenital tract	3	37	8	11	0.822222	0.770833	0.795699
mOTUs251_recall	Urogenital tract	3	46	14	2	0.766667	0.958333	0.851852
Bracken_208_25_refseq	Urogenital tract	3	48	80	0	0.375	1	0.545455
MetaPhlAn v3.0 stat_q 0.2	Urogenital tract	25	39	1	4	0.975	0.906977	0.939759
MetaPhlAn v3.0 stat_q 0.1	Urogenital tract	25	39	4	4	0.906977	0.906977	0.906977
MetaPhlAn2 v2.7	Urogenital tract	25	27	10	16	0.72973	0.627907	0.675
mOTUs251_precision	Urogenital tract	25	30	5	13	0.857143	0.697674	0.769231
mOTUs251_recall	Urogenital tract	25	43	39	0	0.52439	1	0.688
Bracken_208_25_refseq	Urogenital tract	25	43	202	0	0.17551	1	0.298611
MetaPhlAn v3.0 stat_q 0.2	Urogenital tract	24	25	1	2	0.961538	0.925926	0.943396
MetaPhlAn v3.0 stat_q 0.1	Urogenital tract	24	25	1	2	0.961538	0.925926	0.943396
MetaPhlAn2 v2.7	Urogenital tract	24	16	3	11	0.842105	0.592593	0.695652
mOTUs251_precision	Urogenital tract	24	20	3	7	0.869565	0.740741	0.8
mOTUs251_recall	Urogenital tract	24	27	6	0	0.818182	1	0.9
Bracken_208_25_refseq	Urogenital tract	24	27	68	0	0.284211	1	0.442623
MetaPhlAn v3.0 stat_q 0.2	Urogenital tract	22	19	1	2	0.95	0.904762	0.926829
MetaPhlAn v3.0 stat_q 0.1	Urogenital tract	22	19	2	2	0.904762	0.904762	0.904762
MetaPhlAn2 v2.7	Urogenital tract	22	17	4	4	0.809524	0.809524	0.809524
mOTUs251_precision	Urogenital tract	22	14	0	7	1	0.666667	0.8
mOTUs251_recall	Urogenital tract	22	21	15	0	0.583333	1	0.736842
Bracken_208_25_refseq	Urogenital tract	22	21	124	0	0.144828	1	0.253012
MetaPhlAn v3.0 stat_q 0.2	Urogenital tract	21	30	1	4	0.967742	0.882353	0.923077
MetaPhlAn v3.0 stat_q 0.1	Urogenital tract	21	30	3	4	0.909091	0.882353	0.895522
MetaPhlAn2 v2.7	Urogenital tract	21	21	7	13	0.75	0.617647	0.677419
mOTUs251_precision	Urogenital tract	21	23	10	11	0.69697	0.676471	0.686567
mOTUs251_recall	Urogenital tract	21	33	66	1	0.333333	0.970588	0.496241
Bracken_208_25_refseq	Urogenital tract	21	34	222	0	0.132812	1	0.234483
MetaPhlAn v3.0 stat_q 0.2	Urogenital tract	2	23	2	4	0.92	0.851852	0.884615
MetaPhlAn v3.0 stat_q 0.1	Urogenital tract	2	24	5	3	0.827586	0.888889	0.857143
MetaPhlAn2 v2.7	Urogenital tract	2	15	5	12	0.75	0.555556	0.638298
mOTUs251_precision	Urogenital tract	2	22	1	5	0.956522	0.814815	0.88
mOTUs251_recall	Urogenital tract	2	26	4	1	0.866667	0.962963	0.912281
Bracken_208_25_refseq	Urogenital tract	2	26	94	1	0.216667	0.962963	0.353741
MetaPhlAn v3.0 stat_q 0.2	Urogenital tract	0	27	2	7	0.931034	0.794118	0.857143
MetaPhlAn v3.0 stat_q 0.1	Urogenital tract	0	27	7	7	0.794118	0.794118	0.794118
MetaPhlAn2 v2.7	Urogenital tract	0	18	8	16	0.692308	0.529412	0.6
mOTUs251_precision	Urogenital tract	0	23	9	11	0.71875	0.676471	0.69697
mOTUs251_recall	Urogenital tract	0	30	58	4	0.340909	0.882353	0.491803
Bracken_208_25_refseq	Urogenital tract	0	32	198	2	0.13913	0.941176	0.242424
MetaPhlAn v3.0 stat_q 0.2	Skin	28	11	2	2	0.846154	0.846154	0.846154
MetaPhlAn v3.0 stat_q 0.1	Skin	28	11	5	2	0.6875	0.846154	0.758621
MetaPhlAn2 v2.7	Skin	28	8	2	5	0.8	0.615385	0.695652
mOTUs251_precision	Skin	28	8	4	5	0.666667	0.615385	0.64
mOTUs251_recall	Skin	28	12	18	1	0.4	0.923077	0.55814
Bracken_208_25_refseq	Skin	28	13	141	0	0.0844156	1	0.155689
MetaPhlAn v3.0 stat_q 0.2	Skin	20	69	10	13	0.873418	0.841463	0.857143
MetaPhlAn v3.0 stat_q 0.1	Skin	20	70	21	12	0.769231	0.853659	0.809249
MetaPhlAn2 v2.7	Skin	20	50	16	32	0.757576	0.609756	0.675676
mOTUs251_precision	Skin	20	58	7	24	0.892308	0.707317	0.789116
mOTUs251_recall	Skin	20	77	63	5	0.55	0.939024	0.693694
Bracken_208_25_refseq	Skin	20	81	201	1	0.287234	0.987805	0.445055
MetaPhlAn v3.0 stat_q 0.2	Skin	19	89	11	16	0.89	0.847619	0.868293
MetaPhlAn v3.0 stat_q 0.1	Skin	19	90	20	15	0.818182	0.857143	0.837209
MetaPhlAn2 v2.7	Skin	19	63	15	42	0.807692	0.6	0.688525
mOTUs251_precision	Skin	19	72	9	33	0.888889	0.685714	0.774194
mOTUs251_recall	Skin	19	100	74	5	0.574713	0.952381	0.716846
Bracken_208_25_refseq	Skin	19	105	178	0	0.371025	1	0.541237
MetaPhlAn v3.0 stat_q 0.2	Skin	18	23	5	5	0.821429	0.821429	0.821429
MetaPhlAn v3.0 stat_q 0.1	Skin	18	23	6	5	0.793103	0.821429	0.807018
MetaPhlAn2 v2.7	Skin	18	18	4	10	0.818182	0.642857	0.72
mOTUs251_precision	Skin	18	19	4	9	0.826087	0.678571	0.745098
mOTUs251_recall	Skin	18	26	17	2	0.604651	0.928571	0.732394
Bracken_208_25_refseq	Skin	18	28	110	0	0.202899	1	0.337349
MetaPhlAn v3.0 stat_q 0.2	Skin	17	45	4	3	0.918367	0.9375	0.927835
MetaPhlAn v3.0 stat_q 0.1	Skin	17	45	9	3	0.833333	0.9375	0.882353
MetaPhlAn2 v2.7	Skin	17	34	7	14	0.829268	0.708333	0.764045
mOTUs251_precision	Skin	17	33	1	15	0.970588	0.6875	0.804878
mOTUs251_recall	Skin	17	47	21	1	0.691176	0.979167	0.810345
Bracken_208_25_refseq	Skin	17	48	127	0	0.274286	1	0.430493
MetaPhlAn v3.0 stat_q 0.2	Skin	16	10	2	1	0.833333	0.909091	0.869565
MetaPhlAn v3.0 stat_q 0.1	Skin	16	10	2	1	0.833333	0.909091	0.869565
MetaPhlAn2 v2.7	Skin	16	10	1	1	0.909091	0.909091	0.909091
mOTUs251_precision	Skin	16	7	1	4	0.875	0.636364	0.736842
mOTUs251_recall	Skin	16	11	8	0	0.578947	1	0.733333
Bracken_208_25_refseq	Skin	16	11	94	0	0.104762	1	0.189655
MetaPhlAn v3.0 stat_q 0.2	Skin	15	25	3	2	0.892857	0.925926	0.909091
MetaPhlAn v3.0 stat_q 0.1	Skin	15	25	5	2	0.833333	0.925926	0.877193
MetaPhlAn2 v2.7	Skin	15	22	5	5	0.814815	0.814815	0.814815
mOTUs251_precision	Skin	15	18	2	9	0.9	0.666667	0.765957
mOTUs251_recall	Skin	15	27	15	0	0.642857	1	0.782609
Bracken_208_25_refseq	Skin	15	27	130	0	0.171975	1	0.293478
MetaPhlAn v3.0 stat_q 0.2	Skin	14	29	3	1	0.90625	0.966667	0.935484
MetaPhlAn v3.0 stat_q 0.1	Skin	14	29	4	1	0.878788	0.966667	0.920635
MetaPhlAn2 v2.7	Skin	14	22	2	8	0.916667	0.733333	0.814815
mOTUs251_precision	Skin	14	23	4	7	0.851852	0.766667	0.807018
mOTUs251_recall	Skin	14	29	23	1	0.557692	0.966667	0.707317
Bracken_208_25_refseq	Skin	14	30	121	0	0.198675	1	0.331492
MetaPhlAn v3.0 stat_q 0.2	Skin	13	37	2	5	0.948718	0.880952	0.91358
MetaPhlAn v3.0 stat_q 0.1	Skin	13	40	4	2	0.909091	0.952381	0.930233
MetaPhlAn2 v2.7	Skin	13	28	4	14	0.875	0.666667	0.756757
mOTUs251_precision	Skin	13	30	9	12	0.769231	0.714286	0.740741
mOTUs251_recall	Skin	13	39	20	3	0.661017	0.928571	0.772277
Bracken_208_25_refseq	Skin	13	42	95	0	0.306569	1	0.469274
MetaPhlAn v3.0 stat_q 0.2	Skin	1	45	6	6	0.882353	0.882353	0.882353
MetaPhlAn v3.0 stat_q 0.1	Skin	1	45	11	6	0.803571	0.882353	0.841121
MetaPhlAn2 v2.7	Skin	1	34	17	17	0.666667	0.666667	0.666667
mOTUs251_precision	Skin	1	36	2	15	0.947368	0.705882	0.808989
mOTUs251_recall	Skin	1	51	45	0	0.53125	1	0.693878
Bracken_208_25_refseq	Skin	1	51	154	0	0.24878	1	0.398438
MetaPhlAn v3.0 stat_q 0.2	Mouse gut	9	55	7	40	0.887097	0.578947	0.700637
MetaPhlAn v3.0 stat_q 0.1	Mouse gut	9	58	15	37	0.794521	0.610526	0.690476
MetaPhlAn2 v2.7	Mouse gut	9	50	18	45	0.735294	0.526316	0.613497
mOTUs251_precision	Mouse gut	9	55	11	40	0.833333	0.578947	0.68323
mOTUs251_recall	Mouse gut	9	70	25	25	0.736842	0.736842	0.736842
Bracken_208_25_refseq	Mouse gut	9	36	653	59	0.0522496	0.378947	0.0918367
MetaPhlAn v3.0 stat_q 0.2	Mouse gut	8	52	6	40	0.896552	0.565217	0.693333
MetaPhlAn v3.0 stat_q 0.1	Mouse gut	8	55	13	37	0.808824	0.597826	0.6875
MetaPhlAn2 v2.7	Mouse gut	8	44	11	48	0.8	0.478261	0.598639
mOTUs251_precision	Mouse gut	8	50	8	42	0.862069	0.543478	0.666667
mOTUs251_recall	Mouse gut	8	66	23	26	0.741573	0.717391	0.729282
Bracken_208_25_refseq	Mouse gut	8	30	761	62	0.0379267	0.326087	0.0679502
MetaPhlAn v3.0 stat_q 0.2	Mouse gut	7	50	7	18	0.877193	0.735294	0.8
MetaPhlAn v3.0 stat_q 0.1	Mouse gut	7	50	8	18	0.862069	0.735294	0.793651
MetaPhlAn2 v2.7	Mouse gut	7	36	9	32	0.8	0.529412	0.637168
mOTUs251_precision	Mouse gut	7	44	10	24	0.814815	0.647059	0.721311
mOTUs251_recall	Mouse gut	7	58	25	10	0.698795	0.852941	0.768212
Bracken_208_25_refseq	Mouse gut	7	32	673	36	0.0453901	0.470588	0.0827943
MetaPhlAn v3.0 stat_q 0.2	Mouse gut	63	40	11	19	0.784314	0.677966	0.727273
MetaPhlAn v3.0 stat_q 0.1	Mouse gut	63	40	13	19	0.754717	0.677966	0.714286
MetaPhlAn2 v2.7	Mouse gut	63	29	12	30	0.707317	0.491525	0.58
mOTUs251_precision	Mouse gut	63	45	9	14	0.833333	0.762712	0.79646
mOTUs251_recall	Mouse gut	63	53	24	6	0.688312	0.898305	0.779412
Bracken_208_25_refseq	Mouse gut	63	22	1243	37	0.0173913	0.372881	0.0332326
MetaPhlAn v3.0 stat_q 0.2	Mouse gut	62	55	13	28	0.808824	0.662651	0.728477
MetaPhlAn v3.0 stat_q 0.1	Mouse gut	62	57	18	26	0.76	0.686747	0.721519
MetaPhlAn2 v2.7	Mouse gut	62	40	17	43	0.701754	0.481928	0.571429
mOTUs251_precision	Mouse gut	62	60	11	23	0.84507	0.722892	0.779221
mOTUs251_recall	Mouse gut	62	75	35	8	0.681818	0.903614	0.777202
Bracken_208_25_refseq	Mouse gut	62	37	1043	46	0.0342593	0.445783	0.0636285
MetaPhlAn v3.0 stat_q 0.2	Mouse gut	61	142	19	89	0.881988	0.614719	0.72449
MetaPhlAn v3.0 stat_q 0.1	Mouse gut	61	146	29	85	0.834286	0.632035	0.719212
MetaPhlAn2 v2.7	Mouse gut	61	99	30	132	0.767442	0.428571	0.55
mOTUs251_precision	Mouse gut	61	160	14	71	0.91954	0.692641	0.790123
mOTUs251_recall	Mouse gut	61	197	56	34	0.778656	0.852814	0.81405
Bracken_208_25_refseq	Mouse gut	61	63	904	168	0.0651499	0.272727	0.105175
MetaPhlAn v3.0 stat_q 0.2	Mouse gut	60	138	17	87	0.890323	0.613333	0.726316
MetaPhlAn v3.0 stat_q 0.1	Mouse gut	60	143	23	82	0.861446	0.635556	0.731458
MetaPhlAn2 v2.7	Mouse gut	60	102	27	123	0.790698	0.453333	0.576271
mOTUs251_precision	Mouse gut	60	153	15	72	0.910714	0.68	0.778626
mOTUs251_recall	Mouse gut	60	190	58	35	0.766129	0.844444	0.803383
Bracken_208_25_refseq	Mouse gut	60	64	629	161	0.0923521	0.284444	0.139434
MetaPhlAn v3.0 stat_q 0.2	Mouse gut	6	124	13	89	0.905109	0.58216	0.708571
MetaPhlAn v3.0 stat_q 0.1	Mouse gut	6	126	23	87	0.845638	0.591549	0.696133
MetaPhlAn2 v2.7	Mouse gut	6	92	22	121	0.807018	0.431925	0.562691
mOTUs251_precision	Mouse gut	6	141	8	72	0.946309	0.661972	0.779006
mOTUs251_recall	Mouse gut	6	175	44	38	0.799087	0.821596	0.810185
Bracken_208_25_refseq	Mouse gut	6	59	1902	154	0.0300867	0.276995	0.0542778
MetaPhlAn v3.0 stat_q 0.2	Mouse gut	59	132	20	83	0.868421	0.613953	0.719346
MetaPhlAn v3.0 stat_q 0.1	Mouse gut	59	137	24	78	0.850932	0.637209	0.728723
MetaPhlAn2 v2.7	Mouse gut	59	94	23	121	0.803419	0.437209	0.566265
mOTUs251_precision	Mouse gut	59	147	11	68	0.93038	0.683721	0.788204
mOTUs251_recall	Mouse gut	59	179	40	36	0.817352	0.832558	0.824885
Bracken_208_25_refseq	Mouse gut	59	65	631	150	0.0933908	0.302326	0.1427
MetaPhlAn v3.0 stat_q 0.2	Mouse gut	58	130	16	92	0.890411	0.585586	0.706522
MetaPhlAn v3.0 stat_q 0.1	Mouse gut	58	136	25	86	0.84472	0.612613	0.710183
MetaPhlAn2 v2.7	Mouse gut	58	99	25	123	0.798387	0.445946	0.572254
mOTUs251_precision	Mouse gut	58	152	15	70	0.91018	0.684685	0.781491
mOTUs251_recall	Mouse gut	58	181	51	41	0.780172	0.815315	0.797357
Bracken_208_25_refseq	Mouse gut	58	65	812	157	0.0741163	0.292793	0.118289
MetaPhlAn v3.0 stat_q 0.2	Mouse gut	57	104	15	64	0.87395	0.619048	0.724739
MetaPhlAn v3.0 stat_q 0.1	Mouse gut	57	107	20	61	0.84252	0.636905	0.725424
MetaPhlAn2 v2.7	Mouse gut	57	81	22	87	0.786408	0.482143	0.597786
mOTUs251_precision	Mouse gut	57	110	16	58	0.873016	0.654762	0.748299
mOTUs251_recall	Mouse gut	57	133	48	35	0.734807	0.791667	0.762178
Bracken_208_25_refseq	Mouse gut	57	55	638	113	0.0793651	0.327381	0.127758
MetaPhlAn v3.0 stat_q 0.2	Mouse gut	56	92	11	72	0.893204	0.560976	0.689139
MetaPhlAn v3.0 stat_q 0.1	Mouse gut	56	99	15	65	0.868421	0.603659	0.71223
MetaPhlAn2 v2.7	Mouse gut	56	64	16	100	0.8	0.390244	0.52459
mOTUs251_precision	Mouse gut	56	97	12	67	0.889908	0.591463	0.710623
mOTUs251_recall	Mouse gut	56	128	45	36	0.739884	0.780488	0.759644
Bracken_208_25_refseq	Mouse gut	56	44	1824	120	0.0235546	0.268293	0.0433071
MetaPhlAn v3.0 stat_q 0.2	Mouse gut	55	106	8	77	0.929825	0.579235	0.713805
MetaPhlAn v3.0 stat_q 0.1	Mouse gut	55	114	12	69	0.904762	0.622951	0.737864
MetaPhlAn2 v2.7	Mouse gut	55	69	17	114	0.802326	0.377049	0.513011
mOTUs251_precision	Mouse gut	55	117	10	66	0.92126	0.639344	0.754839
mOTUs251_recall	Mouse gut	55	150	40	33	0.789474	0.819672	0.80429
Bracken_208_25_refseq	Mouse gut	55	48	1689	135	0.0276339	0.262295	0.05
MetaPhlAn v3.0 stat_q 0.2	Mouse gut	54	107	13	58	0.891667	0.648485	0.750877
MetaPhlAn v3.0 stat_q 0.1	Mouse gut	54	107	22	58	0.829457	0.648485	0.727891
MetaPhlAn2 v2.7	Mouse gut	54	67	21	98	0.761364	0.406061	0.529644
mOTUs251_precision	Mouse gut	54	108	13	57	0.892562	0.654545	0.755245
mOTUs251_recall	Mouse gut	54	137	44	28	0.756906	0.830303	0.791908
Bracken_208_25_refseq	Mouse gut	54	54	1284	111	0.0403587	0.327273	0.0718563
MetaPhlAn v3.0 stat_q 0.2	Mouse gut	53	95	11	59	0.896226	0.616883	0.730769
MetaPhlAn v3.0 stat_q 0.1	Mouse gut	53	97	14	57	0.873874	0.62987	0.732075
MetaPhlAn2 v2.7	Mouse gut	53	61	23	93	0.72619	0.396104	0.512605
mOTUs251_precision	Mouse gut	53	101	13	53	0.885965	0.655844	0.753731
mOTUs251_recall	Mouse gut	53	127	53	27	0.705556	0.824675	0.760479
Bracken_208_25_refseq	Mouse gut	53	47	1427	107	0.031886	0.305195	0.0577396
MetaPhlAn v3.0 stat_q 0.2	Mouse gut	52	52	7	48	0.881356	0.52	0.654088
MetaPhlAn v3.0 stat_q 0.1	Mouse gut	52	55	9	45	0.859375	0.55	0.670732
MetaPhlAn2 v2.7	Mouse gut	52	57	12	43	0.826087	0.57	0.674556
mOTUs251_precision	Mouse gut	52	51	13	49	0.796875	0.51	0.621951
mOTUs251_recall	Mouse gut	52	72	33	28	0.685714	0.72	0.702439
Bracken_208_25_refseq	Mouse gut	52	37	934	63	0.038105	0.37	0.0690943
MetaPhlAn v3.0 stat_q 0.2	Mouse gut	51	107	16	85	0.869919	0.557292	0.679365
MetaPhlAn v3.0 stat_q 0.1	Mouse gut	51	111	22	81	0.834586	0.578125	0.683077
MetaPhlAn2 v2.7	Mouse gut	51	75	22	117	0.773196	0.390625	0.519031
mOTUs251_precision	Mouse gut	51	132	14	60	0.90411	0.6875	0.781065
mOTUs251_recall	Mouse gut	51	158	47	34	0.770732	0.822917	0.79597
Bracken_208_25_refseq	Mouse gut	51	51	1687	141	0.0293441	0.265625	0.0528497
MetaPhlAn v3.0 stat_q 0.2	Mouse gut	50	62	2	31	0.96875	0.666667	0.789809
MetaPhlAn v3.0 stat_q 0.1	Mouse gut	50	64	9	29	0.876712	0.688172	0.771084
MetaPhlAn2 v2.7	Mouse gut	50	51	19	42	0.728571	0.548387	0.625767
mOTUs251_precision	Mouse gut	50	57	9	36	0.863636	0.612903	0.716981
mOTUs251_recall	Mouse gut	50	73	31	20	0.701923	0.784946	0.741117
Bracken_208_25_refseq	Mouse gut	50	36	769	57	0.0447205	0.387097	0.0801782
MetaPhlAn v3.0 stat_q 0.2	Mouse gut	5	115	10	91	0.92	0.558252	0.694864
MetaPhlAn v3.0 stat_q 0.1	Mouse gut	5	119	19	87	0.862319	0.57767	0.69186
MetaPhlAn2 v2.7	Mouse gut	5	79	19	127	0.806122	0.383495	0.519737
mOTUs251_precision	Mouse gut	5	138	7	68	0.951724	0.669903	0.786325
mOTUs251_recall	Mouse gut	5	170	38	36	0.817308	0.825243	0.821256
Bracken_208_25_refseq	Mouse gut	5	53	2132	153	0.0242563	0.257282	0.0443329
MetaPhlAn v3.0 stat_q 0.2	Mouse gut	49	52	6	36	0.896552	0.590909	0.712329
MetaPhlAn v3.0 stat_q 0.1	Mouse gut	49	54	10	34	0.84375	0.613636	0.710526
MetaPhlAn2 v2.7	Mouse gut	49	34	10	54	0.772727	0.386364	0.515152
mOTUs251_precision	Mouse gut	49	58	10	30	0.852941	0.659091	0.74359
mOTUs251_recall	Mouse gut	49	76	27	12	0.737864	0.863636	0.795812
Bracken_208_25_refseq	Mouse gut	49	24	882	64	0.0264901	0.272727	0.0482897
MetaPhlAn v3.0 stat_q 0.2	Mouse gut	48	119	11	98	0.915385	0.548387	0.685879
MetaPhlAn v3.0 stat_q 0.1	Mouse gut	48	121	19	96	0.864286	0.557604	0.677871
MetaPhlAn2 v2.7	Mouse gut	48	81	27	136	0.75	0.373272	0.498462
mOTUs251_precision	Mouse gut	48	141	14	76	0.909677	0.64977	0.758065
mOTUs251_recall	Mouse gut	48	174	55	43	0.759825	0.801843	0.780269
Bracken_208_25_refseq	Mouse gut	48	47	1915	170	0.0239551	0.21659	0.0431391
MetaPhlAn v3.0 stat_q 0.2	Mouse gut	47	90	12	61	0.882353	0.596026	0.711462
MetaPhlAn v3.0 stat_q 0.1	Mouse gut	47	92	22	59	0.807018	0.609272	0.69434
MetaPhlAn2 v2.7	Mouse gut	47	65	19	86	0.77381	0.430464	0.553191
mOTUs251_precision	Mouse gut	47	103	14	48	0.880342	0.682119	0.768657
mOTUs251_recall	Mouse gut	47	130	46	21	0.738636	0.860927	0.795107
Bracken_208_25_refseq	Mouse gut	47	43	1213	108	0.0342357	0.284768	0.061123
MetaPhlAn v3.0 stat_q 0.2	Mouse gut	46	102	8	58	0.927273	0.6375	0.755556
MetaPhlAn v3.0 stat_q 0.1	Mouse gut	46	104	12	56	0.896552	0.65	0.753623
MetaPhlAn2 v2.7	Mouse gut	46	66	21	94	0.758621	0.4125	0.534413
mOTUs251_precision	Mouse gut	46	106	11	54	0.905983	0.6625	0.765343
mOTUs251_recall	Mouse gut	46	133	39	27	0.773256	0.83125	0.801205
Bracken_208_25_refseq	Mouse gut	46	42	1350	118	0.0301724	0.2625	0.0541237
MetaPhlAn v3.0 stat_q 0.2	Mouse gut	45	104	9	86	0.920354	0.547368	0.686469
MetaPhlAn v3.0 stat_q 0.1	Mouse gut	45	111	15	79	0.880952	0.584211	0.702532
MetaPhlAn2 v2.7	Mouse gut	45	63	24	127	0.724138	0.331579	0.454874
mOTUs251_precision	Mouse gut	45	118	10	72	0.921875	0.621053	0.742138
mOTUs251_recall	Mouse gut	45	152	44	38	0.77551	0.8	0.787565
Bracken_208_25_refseq	Mouse gut	45	45	1606	145	0.0272562	0.236842	0.0488865
MetaPhlAn v3.0 stat_q 0.2	Mouse gut	44	117	16	81	0.879699	0.590909	0.706949
MetaPhlAn v3.0 stat_q 0.1	Mouse gut	44	120	22	78	0.84507	0.606061	0.705882
MetaPhlAn2 v2.7	Mouse gut	44	87	26	111	0.769912	0.439394	0.559486
mOTUs251_precision	Mouse gut	44	131	12	67	0.916084	0.661616	0.768328
mOTUs251_recall	Mouse gut	44	163	47	35	0.77619	0.823232	0.79902
Bracken_208_25_refseq	Mouse gut	44	54	1168	144	0.0441899	0.272727	0.0760563
MetaPhlAn v3.0 stat_q 0.2	Mouse gut	43	125	13	79	0.905797	0.612745	0.730994
MetaPhlAn v3.0 stat_q 0.1	Mouse gut	43	126	23	78	0.845638	0.617647	0.713881
MetaPhlAn2 v2.7	Mouse gut	43	88	25	116	0.778761	0.431373	0.555205
mOTUs251_precision	Mouse gut	43	140	11	64	0.927152	0.686275	0.788732
mOTUs251_recall	Mouse gut	43	173	39	31	0.816038	0.848039	0.831731
Bracken_208_25_refseq	Mouse gut	43	58	1252	146	0.0442748	0.284314	0.0766182
MetaPhlAn v3.0 stat_q 0.2	Mouse gut	42	121	12	79	0.909774	0.605	0.726727
MetaPhlAn v3.0 stat_q 0.1	Mouse gut	42	124	22	76	0.849315	0.62	0.716763
MetaPhlAn2 v2.7	Mouse gut	42	75	30	125	0.714286	0.375	0.491803
mOTUs251_precision	Mouse gut	42	138	12	62	0.92	0.69	0.788571
mOTUs251_recall	Mouse gut	42	171	47	29	0.784404	0.855	0.818182
Bracken_208_25_refseq	Mouse gut	42	47	1970	153	0.0233019	0.235	0.0423996
MetaPhlAn v3.0 stat_q 0.2	Mouse gut	41	91	14	47	0.866667	0.65942	0.748971
MetaPhlAn v3.0 stat_q 0.1	Mouse gut	41	93	25	45	0.788136	0.673913	0.726562
MetaPhlAn2 v2.7	Mouse gut	41	61	16	77	0.792208	0.442029	0.567442
mOTUs251_precision	Mouse gut	41	100	13	38	0.884956	0.724638	0.796813
mOTUs251_recall	Mouse gut	41	124	42	14	0.746988	0.898551	0.815789
Bracken_208_25_refseq	Mouse gut	41	47	805	91	0.0551643	0.34058	0.0949495
MetaPhlAn v3.0 stat_q 0.2	Mouse gut	40	139	9	90	0.939189	0.606987	0.737401
MetaPhlAn v3.0 stat_q 0.1	Mouse gut	40	142	20	87	0.876543	0.620087	0.726343
MetaPhlAn2 v2.7	Mouse gut	40	98	23	131	0.809917	0.427948	0.56
mOTUs251_precision	Mouse gut	40	157	10	72	0.94012	0.68559	0.792929
mOTUs251_recall	Mouse gut	40	193	41	36	0.824786	0.842795	0.833693
Bracken_208_25_refseq	Mouse gut	40	62	993	167	0.0587678	0.270742	0.0965732
MetaPhlAn v3.0 stat_q 0.2	Mouse gut	4	40	8	22	0.833333	0.645161	0.727273
MetaPhlAn v3.0 stat_q 0.1	Mouse gut	4	40	10	22	0.8	0.645161	0.714286
MetaPhlAn2 v2.7	Mouse gut	4	30	11	32	0.731707	0.483871	0.582524
mOTUs251_precision	Mouse gut	4	46	9	16	0.836364	0.741935	0.786325
mOTUs251_recall	Mouse gut	4	56	19	6	0.746667	0.903226	0.817518
Bracken_208_25_refseq	Mouse gut	4	23	1237	39	0.018254	0.370968	0.0347958
MetaPhlAn v3.0 stat_q 0.2	Mouse gut	39	87	11	55	0.887755	0.612676	0.725
MetaPhlAn v3.0 stat_q 0.1	Mouse gut	39	87	19	55	0.820755	0.612676	0.701613
MetaPhlAn2 v2.7	Mouse gut	39	59	19	83	0.75641	0.415493	0.536364
mOTUs251_precision	Mouse gut	39	103	13	39	0.887931	0.725352	0.79845
mOTUs251_recall	Mouse gut	39	124	42	18	0.746988	0.873239	0.805195
Bracken_208_25_refseq	Mouse gut	39	38	1204	104	0.0305958	0.267606	0.0549133
MetaPhlAn v3.0 stat_q 0.2	Mouse gut	38	59	11	38	0.842857	0.608247	0.706587
MetaPhlAn v3.0 stat_q 0.1	Mouse gut	38	60	17	37	0.779221	0.618557	0.689655
MetaPhlAn2 v2.7	Mouse gut	38	46	16	51	0.741935	0.474227	0.578616
mOTUs251_precision	Mouse gut	38	69	12	28	0.851852	0.71134	0.775281
mOTUs251_recall	Mouse gut	38	88	36	9	0.709677	0.907216	0.79638
Bracken_208_25_refseq	Mouse gut	38	42	895	55	0.0448239	0.43299	0.0812379
MetaPhlAn v3.0 stat_q 0.2	Mouse gut	37	128	10	84	0.927536	0.603774	0.731429
MetaPhlAn v3.0 stat_q 0.1	Mouse gut	37	134	17	78	0.887417	0.632075	0.738292
MetaPhlAn2 v2.7	Mouse gut	37	81	30	131	0.72973	0.382075	0.501548
mOTUs251_precision	Mouse gut	37	148	8	64	0.948718	0.698113	0.804348
mOTUs251_recall	Mouse gut	37	182	38	30	0.827273	0.858491	0.842593
Bracken_208_25_refseq	Mouse gut	37	56	862	156	0.0610022	0.264151	0.099115
MetaPhlAn v3.0 stat_q 0.2	Mouse gut	36	111	9	82	0.925	0.57513	0.709265
MetaPhlAn v3.0 stat_q 0.1	Mouse gut	36	114	15	79	0.883721	0.590674	0.708075
MetaPhlAn2 v2.7	Mouse gut	36	71	26	122	0.731959	0.367876	0.489655
mOTUs251_precision	Mouse gut	36	131	13	62	0.909722	0.678756	0.777448
mOTUs251_recall	Mouse gut	36	161	40	32	0.800995	0.834197	0.817259
Bracken_208_25_refseq	Mouse gut	36	50	1020	143	0.046729	0.259067	0.0791766
MetaPhlAn v3.0 stat_q 0.2	Mouse gut	35	44	5	19	0.897959	0.698413	0.785714
MetaPhlAn v3.0 stat_q 0.1	Mouse gut	35	44	7	19	0.862745	0.698413	0.77193
MetaPhlAn2 v2.7	Mouse gut	35	33	11	30	0.75	0.52381	0.616822
mOTUs251_precision	Mouse gut	35	47	9	16	0.839286	0.746032	0.789916
mOTUs251_recall	Mouse gut	35	57	23	6	0.7125	0.904762	0.797203
Bracken_208_25_refseq	Mouse gut	35	27	1027	36	0.0256167	0.428571	0.0483438
MetaPhlAn v3.0 stat_q 0.2	Mouse gut	34	141	16	84	0.898089	0.626667	0.73822
MetaPhlAn v3.0 stat_q 0.1	Mouse gut	34	144	22	81	0.86747	0.64	0.736573
MetaPhlAn2 v2.7	Mouse gut	34	93	31	132	0.75	0.413333	0.532951
mOTUs251_precision	Mouse gut	34	157	15	68	0.912791	0.697778	0.790932
mOTUs251_recall	Mouse gut	34	191	51	34	0.789256	0.848889	0.817987
Bracken_208_25_refseq	Mouse gut	34	62	699	163	0.0814717	0.275556	0.125761
MetaPhlAn v3.0 stat_q 0.2	Mouse gut	33	122	18	82	0.871429	0.598039	0.709302
MetaPhlAn v3.0 stat_q 0.1	Mouse gut	33	122	23	82	0.841379	0.598039	0.69914
MetaPhlAn2 v2.7	Mouse gut	33	73	29	131	0.715686	0.357843	0.477124
mOTUs251_precision	Mouse gut	33	147	11	57	0.93038	0.720588	0.812155
mOTUs251_recall	Mouse gut	33	175	43	29	0.802752	0.857843	0.829384
Bracken_208_25_refseq	Mouse gut	33	57	1148	147	0.0473029	0.279412	0.0809084
MetaPhlAn v3.0 stat_q 0.2	Mouse gut	32	34	2	15	0.944444	0.693878	0.8
MetaPhlAn v3.0 stat_q 0.1	Mouse gut	32	35	4	14	0.897436	0.714286	0.795455
MetaPhlAn2 v2.7	Mouse gut	32	27	6	22	0.818182	0.55102	0.658537
mOTUs251_precision	Mouse gut	32	36	5	13	0.878049	0.734694	0.8
mOTUs251_recall	Mouse gut	32	46	18	3	0.71875	0.938776	0.814159
Bracken_208_25_refseq	Mouse gut	32	28	636	21	0.0421687	0.571429	0.0785414
MetaPhlAn v3.0 stat_q 0.2	Mouse gut	31	95	13	59	0.87963	0.616883	0.725191
MetaPhlAn v3.0 stat_q 0.1	Mouse gut	31	99	21	55	0.825	0.642857	0.722628
MetaPhlAn2 v2.7	Mouse gut	31	68	31	86	0.686869	0.441558	0.537549
mOTUs251_precision	Mouse gut	31	104	10	50	0.912281	0.675325	0.776119
mOTUs251_recall	Mouse gut	31	134	39	20	0.774566	0.87013	0.819572
Bracken_208_25_refseq	Mouse gut	31	48	563	106	0.0785597	0.311688	0.12549
MetaPhlAn v3.0 stat_q 0.2	Mouse gut	30	120	12	87	0.909091	0.57971	0.707965
MetaPhlAn v3.0 stat_q 0.1	Mouse gut	30	124	22	83	0.849315	0.599034	0.70255
MetaPhlAn2 v2.7	Mouse gut	30	78	28	129	0.735849	0.376812	0.498403
mOTUs251_precision	Mouse gut	30	144	10	63	0.935065	0.695652	0.797784
mOTUs251_recall	Mouse gut	30	177	38	30	0.823256	0.855072	0.838863
Bracken_208_25_refseq	Mouse gut	30	49	677	158	0.0674931	0.236715	0.105038
MetaPhlAn v3.0 stat_q 0.2	Mouse gut	3	81	8	41	0.910112	0.663934	0.767773
MetaPhlAn v3.0 stat_q 0.1	Mouse gut	3	81	15	41	0.84375	0.663934	0.743119
MetaPhlAn2 v2.7	Mouse gut	3	60	16	62	0.789474	0.491803	0.606061
mOTUs251_precision	Mouse gut	3	85	9	37	0.904255	0.696721	0.787037
mOTUs251_recall	Mouse gut	3	102	30	20	0.772727	0.836066	0.80315
Bracken_208_25_refseq	Mouse gut	3	36	1466	86	0.023968	0.295082	0.044335
MetaPhlAn v3.0 stat_q 0.2	Mouse gut	29	71	9	37	0.8875	0.657407	0.755319
MetaPhlAn v3.0 stat_q 0.1	Mouse gut	29	75	13	33	0.852273	0.694444	0.765306
MetaPhlAn2 v2.7	Mouse gut	29	44	19	64	0.698413	0.407407	0.51462
mOTUs251_precision	Mouse gut	29	80	10	28	0.888889	0.740741	0.808081
mOTUs251_recall	Mouse gut	29	98	30	10	0.765625	0.907407	0.830508
Bracken_208_25_refseq	Mouse gut	29	42	993	66	0.0405797	0.388889	0.0734908
MetaPhlAn v3.0 stat_q 0.2	Mouse gut	28	110	15	86	0.88	0.561224	0.685358
MetaPhlAn v3.0 stat_q 0.1	Mouse gut	28	115	22	81	0.839416	0.586735	0.690691
MetaPhlAn2 v2.7	Mouse gut	28	78	30	118	0.722222	0.397959	0.513158
mOTUs251_precision	Mouse gut	28	124	12	72	0.911765	0.632653	0.746988
mOTUs251_recall	Mouse gut	28	157	42	39	0.788945	0.80102	0.794937
Bracken_208_25_refseq	Mouse gut	28	46	405	150	0.101996	0.234694	0.142195
MetaPhlAn v3.0 stat_q 0.2	Mouse gut	27	111	14	93	0.888	0.544118	0.674772
MetaPhlAn v3.0 stat_q 0.1	Mouse gut	27	118	19	86	0.861314	0.578431	0.692082
MetaPhlAn2 v2.7	Mouse gut	27	79	31	125	0.718182	0.387255	0.503185
mOTUs251_precision	Mouse gut	27	127	15	77	0.894366	0.622549	0.734104
mOTUs251_recall	Mouse gut	27	166	46	38	0.783019	0.813725	0.798077
Bracken_208_25_refseq	Mouse gut	27	52	499	152	0.0943739	0.254902	0.137748
MetaPhlAn v3.0 stat_q 0.2	Mouse gut	26	63	10	38	0.863014	0.623762	0.724138
MetaPhlAn v3.0 stat_q 0.1	Mouse gut	26	65	14	36	0.822785	0.643564	0.722222
MetaPhlAn2 v2.7	Mouse gut	26	45	17	56	0.725806	0.445545	0.552147
mOTUs251_precision	Mouse gut	26	76	12	25	0.863636	0.752475	0.804233
mOTUs251_recall	Mouse gut	26	94	32	7	0.746032	0.930693	0.828194
Bracken_208_25_refseq	Mouse gut	26	37	863	64	0.0411111	0.366337	0.0739261
MetaPhlAn v3.0 stat_q 0.2	Mouse gut	25	124	13	77	0.905109	0.616915	0.733728
MetaPhlAn v3.0 stat_q 0.1	Mouse gut	25	125	21	76	0.856164	0.621891	0.720461
MetaPhlAn2 v2.7	Mouse gut	25	71	25	130	0.739583	0.353234	0.478114
mOTUs251_precision	Mouse gut	25	137	16	64	0.895425	0.681592	0.774011
mOTUs251_recall	Mouse gut	25	169	45	32	0.78972	0.840796	0.814458
Bracken_208_25_refseq	Mouse gut	25	55	916	146	0.0566426	0.273632	0.0938567
MetaPhlAn v3.0 stat_q 0.2	Mouse gut	24	120	12	83	0.909091	0.591133	0.716418
MetaPhlAn v3.0 stat_q 0.1	Mouse gut	24	125	19	78	0.868056	0.615764	0.720461
MetaPhlAn2 v2.7	Mouse gut	24	70	27	133	0.721649	0.344828	0.466667
mOTUs251_precision	Mouse gut	24	143	10	60	0.934641	0.704433	0.803371
mOTUs251_recall	Mouse gut	24	172	41	31	0.807512	0.847291	0.826923
Bracken_208_25_refseq	Mouse gut	24	50	791	153	0.059453	0.246305	0.0957854
MetaPhlAn v3.0 stat_q 0.2	Mouse gut	23	70	9	32	0.886076	0.686275	0.773481
MetaPhlAn v3.0 stat_q 0.1	Mouse gut	23	70	15	32	0.823529	0.686275	0.748663
MetaPhlAn2 v2.7	Mouse gut	23	43	12	59	0.781818	0.421569	0.547771
mOTUs251_precision	Mouse gut	23	74	5	28	0.936709	0.72549	0.81768
mOTUs251_recall	Mouse gut	23	94	39	8	0.706767	0.921569	0.8
Bracken_208_25_refseq	Mouse gut	23	41	712	61	0.0544489	0.401961	0.0959064
MetaPhlAn v3.0 stat_q 0.2	Mouse gut	22	132	17	74	0.885906	0.640777	0.743662
MetaPhlAn v3.0 stat_q 0.1	Mouse gut	22	134	22	72	0.858974	0.650485	0.740331
MetaPhlAn2 v2.7	Mouse gut	22	88	28	118	0.758621	0.427184	0.546584
mOTUs251_precision	Mouse gut	22	142	15	64	0.904459	0.68932	0.782369
mOTUs251_recall	Mouse gut	22	173	45	33	0.793578	0.839806	0.816038
Bracken_208_25_refseq	Mouse gut	22	62	543	144	0.102479	0.300971	0.152898
MetaPhlAn v3.0 stat_q 0.2	Mouse gut	21	72	13	33	0.847059	0.685714	0.757895
MetaPhlAn v3.0 stat_q 0.1	Mouse gut	21	73	18	32	0.802198	0.695238	0.744898
MetaPhlAn2 v2.7	Mouse gut	21	43	15	62	0.741379	0.409524	0.527607
mOTUs251_precision	Mouse gut	21	80	14	25	0.851064	0.761905	0.80402
mOTUs251_recall	Mouse gut	21	95	29	10	0.766129	0.904762	0.829694
Bracken_208_25_refseq	Mouse gut	21	43	1017	62	0.040566	0.409524	0.0738197
MetaPhlAn v3.0 stat_q 0.2	Mouse gut	20	96	13	51	0.880734	0.653061	0.75
MetaPhlAn v3.0 stat_q 0.1	Mouse gut	20	98	19	49	0.837607	0.666667	0.742424
MetaPhlAn2 v2.7	Mouse gut	20	61	24	86	0.717647	0.414966	0.525862
mOTUs251_precision	Mouse gut	20	104	9	43	0.920354	0.707483	0.8
mOTUs251_recall	Mouse gut	20	128	45	19	0.739884	0.870748	0.8
Bracken_208_25_refseq	Mouse gut	20	46	543	101	0.0780985	0.312925	0.125
MetaPhlAn v3.0 stat_q 0.2	Mouse gut	2	48	9	27	0.842105	0.64	0.727273
MetaPhlAn v3.0 stat_q 0.1	Mouse gut	2	48	16	27	0.75	0.64	0.690647
MetaPhlAn2 v2.7	Mouse gut	2	29	15	46	0.659091	0.386667	0.487395
mOTUs251_precision	Mouse gut	2	56	6	19	0.903226	0.746667	0.817518
mOTUs251_recall	Mouse gut	2	69	24	6	0.741935	0.92	0.821429
Bracken_208_25_refseq	Mouse gut	2	38	514	37	0.0688406	0.506667	0.121212
MetaPhlAn v3.0 stat_q 0.2	Mouse gut	19	84	15	48	0.848485	0.636364	0.727273
MetaPhlAn v3.0 stat_q 0.1	Mouse gut	19	85	20	47	0.809524	0.643939	0.7173
MetaPhlAn2 v2.7	Mouse gut	19	48	25	84	0.657534	0.363636	0.468293
mOTUs251_precision	Mouse gut	19	89	11	43	0.89	0.674242	0.767241
mOTUs251_recall	Mouse gut	19	111	37	21	0.75	0.840909	0.792857
Bracken_208_25_refseq	Mouse gut	19	36	779	96	0.0441718	0.272727	0.0760296
MetaPhlAn v3.0 stat_q 0.2	Mouse gut	18	52	9	21	0.852459	0.712329	0.776119
MetaPhlAn v3.0 stat_q 0.1	Mouse gut	18	52	13	21	0.8	0.712329	0.753623
MetaPhlAn2 v2.7	Mouse gut	18	31	7	42	0.815789	0.424658	0.558559
mOTUs251_precision	Mouse gut	18	55	10	18	0.846154	0.753425	0.797101
mOTUs251_recall	Mouse gut	18	63	22	10	0.741176	0.863014	0.797468
Bracken_208_25_refseq	Mouse gut	18	31	247	42	0.111511	0.424658	0.176638
MetaPhlAn v3.0 stat_q 0.2	Mouse gut	17	89	13	49	0.872549	0.644928	0.741667
MetaPhlAn v3.0 stat_q 0.1	Mouse gut	17	89	17	49	0.839623	0.644928	0.729508
MetaPhlAn2 v2.7	Mouse gut	17	48	26	90	0.648649	0.347826	0.45283
mOTUs251_precision	Mouse gut	17	94	11	44	0.895238	0.681159	0.773663
mOTUs251_recall	Mouse gut	17	117	40	21	0.745223	0.847826	0.79322
Bracken_208_25_refseq	Mouse gut	17	36	768	102	0.0447761	0.26087	0.0764331
MetaPhlAn v3.0 stat_q 0.2	Mouse gut	16	48	7	27	0.872727	0.64	0.738462
MetaPhlAn v3.0 stat_q 0.1	Mouse gut	16	48	9	27	0.842105	0.64	0.727273
MetaPhlAn2 v2.7	Mouse gut	16	34	9	41	0.790698	0.453333	0.576271
mOTUs251_precision	Mouse gut	16	53	6	22	0.898305	0.706667	0.791045
mOTUs251_recall	Mouse gut	16	66	25	9	0.725275	0.88	0.795181
Bracken_208_25_refseq	Mouse gut	16	29	142	46	0.169591	0.386667	0.235772
MetaPhlAn v3.0 stat_q 0.2	Mouse gut	15	111	18	59	0.860465	0.652941	0.742475
MetaPhlAn v3.0 stat_q 0.1	Mouse gut	15	112	22	58	0.835821	0.658824	0.736842
MetaPhlAn2 v2.7	Mouse gut	15	69	25	101	0.734043	0.405882	0.522727
mOTUs251_precision	Mouse gut	15	112	14	58	0.888889	0.658824	0.756757
mOTUs251_recall	Mouse gut	15	145	36	25	0.801105	0.852941	0.826211
Bracken_208_25_refseq	Mouse gut	15	47	688	123	0.0639456	0.276471	0.103867
MetaPhlAn v3.0 stat_q 0.2	Mouse gut	14	95	14	67	0.87156	0.58642	0.701107
MetaPhlAn v3.0 stat_q 0.1	Mouse gut	14	96	18	66	0.842105	0.592593	0.695652
MetaPhlAn2 v2.7	Mouse gut	14	65	21	97	0.755814	0.401235	0.524194
mOTUs251_precision	Mouse gut	14	104	11	58	0.904348	0.641975	0.750903
mOTUs251_recall	Mouse gut	14	137	43	25	0.761111	0.845679	0.80117
Bracken_208_25_refseq	Mouse gut	14	38	609	124	0.0587326	0.234568	0.0939431
MetaPhlAn v3.0 stat_q 0.2	Mouse gut	13	73	12	38	0.858824	0.657658	0.744898
MetaPhlAn v3.0 stat_q 0.1	Mouse gut	13	75	15	36	0.833333	0.675676	0.746269
MetaPhlAn2 v2.7	Mouse gut	13	43	12	68	0.781818	0.387387	0.518072
mOTUs251_precision	Mouse gut	13	76	8	35	0.904762	0.684685	0.779487
mOTUs251_recall	Mouse gut	13	95	35	16	0.730769	0.855856	0.788382
Bracken_208_25_refseq	Mouse gut	13	45	468	66	0.0877193	0.405405	0.144231
MetaPhlAn v3.0 stat_q 0.2	Mouse gut	12	106	25	56	0.80916	0.654321	0.723549
MetaPhlAn v3.0 stat_q 0.1	Mouse gut	12	109	32	53	0.77305	0.67284	0.719472
MetaPhlAn2 v2.7	Mouse gut	12	70	22	92	0.76087	0.432099	0.551181
mOTUs251_precision	Mouse gut	12	114	12	48	0.904762	0.703704	0.791667
mOTUs251_recall	Mouse gut	12	141	38	21	0.787709	0.87037	0.826979
Bracken_208_25_refseq	Mouse gut	12	50	525	112	0.0869565	0.308642	0.135685
MetaPhlAn v3.0 stat_q 0.2	Mouse gut	11	93	13	65	0.877358	0.588608	0.704545
MetaPhlAn v3.0 stat_q 0.1	Mouse gut	11	96	15	62	0.864865	0.607595	0.713755
MetaPhlAn2 v2.7	Mouse gut	11	65	17	93	0.792683	0.411392	0.541667
mOTUs251_precision	Mouse gut	11	100	9	58	0.917431	0.632911	0.749064
mOTUs251_recall	Mouse gut	11	133	29	25	0.820988	0.841772	0.83125
Bracken_208_25_refseq	Mouse gut	11	45	1084	113	0.0398583	0.28481	0.0699301
MetaPhlAn v3.0 stat_q 0.2	Mouse gut	10	84	14	36	0.857143	0.7	0.770642
MetaPhlAn v3.0 stat_q 0.1	Mouse gut	10	86	17	34	0.834951	0.716667	0.7713
MetaPhlAn2 v2.7	Mouse gut	10	55	10	65	0.846154	0.458333	0.594595
mOTUs251_precision	Mouse gut	10	87	13	33	0.87	0.725	0.790909
mOTUs251_recall	Mouse gut	10	107	34	13	0.758865	0.891667	0.819923
Bracken_208_25_refseq	Mouse gut	10	45	520	75	0.079646	0.375	0.131387
MetaPhlAn v3.0 stat_q 0.2	Mouse gut	1	49	5	33	0.907407	0.597561	0.720588
MetaPhlAn v3.0 stat_q 0.1	Mouse gut	1	51	11	31	0.822581	0.621951	0.708333
MetaPhlAn2 v2.7	Mouse gut	1	31	13	51	0.704545	0.378049	0.492063
mOTUs251_precision	Mouse gut	1	56	9	26	0.861538	0.682927	0.761905
mOTUs251_recall	Mouse gut	1	70	22	12	0.76087	0.853659	0.804598
Bracken_208_25_refseq	Mouse gut	1	28	504	54	0.0526316	0.341463	0.0912052
MetaPhlAn v3.0 stat_q 0.2	Mouse gut	0	42	7	22	0.857143	0.65625	0.743363
MetaPhlAn v3.0 stat_q 0.1	Mouse gut	0	43	13	21	0.767857	0.671875	0.716667
MetaPhlAn2 v2.7	Mouse gut	0	31	10	33	0.756098	0.484375	0.590476
mOTUs251_precision	Mouse gut	0	37	8	27	0.822222	0.578125	0.678899
mOTUs251_recall	Mouse gut	0	50	25	14	0.666667	0.78125	0.719424
Bracken_208_25_refseq	Mouse gut	0	30	186	34	0.138889	0.46875	0.214286
MetaPhlAn v3.0 stat_q 0.2	Oral	8	54	5	6	0.915254	0.9	0.907563
MetaPhlAn v3.0 stat_q 0.1	Oral	8	56	8	4	0.875	0.933333	0.903226
MetaPhlAn2 v2.7	Oral	8	42	12	18	0.777778	0.7	0.736842
mOTUs251_precision	Oral	8	44	3	16	0.93617	0.733333	0.82243
mOTUs251_recall	Oral	8	58	18	2	0.763158	0.966667	0.852941
Bracken_208_25_refseq	Oral	8	59	102	1	0.36646	0.983333	0.533937
MetaPhlAn v3.0 stat_q 0.2	Oral	7	54	6	5	0.9	0.915254	0.907563
MetaPhlAn v3.0 stat_q 0.1	Oral	7	55	9	4	0.859375	0.932203	0.894309
MetaPhlAn2 v2.7	Oral	7	39	9	20	0.8125	0.661017	0.728972
mOTUs251_precision	Oral	7	43	6	16	0.877551	0.728814	0.796296
mOTUs251_recall	Oral	7	55	21	4	0.723684	0.932203	0.814815
Bracken_208_25_refseq	Oral	7	58	93	1	0.384106	0.983051	0.552381
MetaPhlAn v3.0 stat_q 0.2	Oral	6	42	3	4	0.933333	0.913043	0.923077
MetaPhlAn v3.0 stat_q 0.1	Oral	6	42	9	4	0.823529	0.913043	0.865979
MetaPhlAn2 v2.7	Oral	6	29	8	17	0.783784	0.630435	0.698795
mOTUs251_precision	Oral	6	34	7	12	0.829268	0.73913	0.781609
mOTUs251_recall	Oral	6	43	26	3	0.623188	0.934783	0.747826
Bracken_208_25_refseq	Oral	6	46	129	0	0.262857	1	0.41629
MetaPhlAn v3.0 stat_q 0.2	Oral	19	82	9	14	0.901099	0.854167	0.877005
MetaPhlAn v3.0 stat_q 0.1	Oral	19	83	15	13	0.846939	0.864583	0.85567
MetaPhlAn2 v2.7	Oral	19	60	14	36	0.810811	0.625	0.705882
mOTUs251_precision	Oral	19	63	13	33	0.828947	0.65625	0.732558
mOTUs251_recall	Oral	19	90	58	6	0.608108	0.9375	0.737705
Bracken_208_25_refseq	Oral	19	95	151	1	0.386179	0.989583	0.555556
MetaPhlAn v3.0 stat_q 0.2	Oral	18	68	7	6	0.906667	0.918919	0.912752
MetaPhlAn v3.0 stat_q 0.1	Oral	18	69	16	5	0.811765	0.932432	0.867925
MetaPhlAn2 v2.7	Oral	18	40	15	34	0.727273	0.540541	0.620155
mOTUs251_precision	Oral	18	58	16	16	0.783784	0.783784	0.783784
mOTUs251_recall	Oral	18	69	49	5	0.584746	0.932432	0.71875
Bracken_208_25_refseq	Oral	18	73	158	1	0.316017	0.986486	0.478689
MetaPhlAn v3.0 stat_q 0.2	Oral	17	48	5	5	0.90566	0.90566	0.90566
MetaPhlAn v3.0 stat_q 0.1	Oral	17	48	8	5	0.857143	0.90566	0.880734
MetaPhlAn2 v2.7	Oral	17	35	13	18	0.729167	0.660377	0.693069
mOTUs251_precision	Oral	17	38	6	15	0.863636	0.716981	0.783505
mOTUs251_recall	Oral	17	50	26	3	0.657895	0.943396	0.775194
Bracken_208_25_refseq	Oral	17	52	125	1	0.293785	0.981132	0.452174
MetaPhlAn v3.0 stat_q 0.2	Oral	16	111	14	18	0.888	0.860465	0.874016
MetaPhlAn v3.0 stat_q 0.1	Oral	16	115	22	14	0.839416	0.891473	0.864662
MetaPhlAn2 v2.7	Oral	16	71	18	58	0.797753	0.550388	0.651376
mOTUs251_precision	Oral	16	89	9	40	0.908163	0.689922	0.784141
mOTUs251_recall	Oral	16	117	64	12	0.646409	0.906977	0.754839
Bracken_208_25_refseq	Oral	16	129	162	0	0.443299	1	0.614286
MetaPhlAn v3.0 stat_q 0.2	Oral	15	70	8	8	0.897436	0.897436	0.897436
MetaPhlAn v3.0 stat_q 0.1	Oral	15	71	14	7	0.835294	0.910256	0.871166
MetaPhlAn2 v2.7	Oral	15	44	15	34	0.745763	0.564103	0.642336
mOTUs251_precision	Oral	15	60	12	18	0.833333	0.769231	0.8
mOTUs251_recall	Oral	15	75	43	3	0.635593	0.961538	0.765306
Bracken_208_25_refseq	Oral	15	77	128	1	0.37561	0.987179	0.54417
MetaPhlAn v3.0 stat_q 0.2	Oral	14	57	4	7	0.934426	0.890625	0.912
MetaPhlAn v3.0 stat_q 0.1	Oral	14	57	9	7	0.863636	0.890625	0.876923
MetaPhlAn2 v2.7	Oral	14	33	9	31	0.785714	0.515625	0.622642
mOTUs251_precision	Oral	14	51	15	13	0.772727	0.796875	0.784615
mOTUs251_recall	Oral	14	59	35	5	0.62766	0.921875	0.746835
Bracken_208_25_refseq	Oral	14	64	113	0	0.361582	1	0.53112
MetaPhlAn v3.0 stat_q 0.2	Oral	13	62	9	11	0.873239	0.849315	0.861111
MetaPhlAn v3.0 stat_q 0.1	Oral	13	62	18	11	0.775	0.849315	0.810458
MetaPhlAn2 v2.7	Oral	13	38	11	35	0.77551	0.520548	0.622951
mOTUs251_precision	Oral	13	55	9	18	0.859375	0.753425	0.80292
mOTUs251_recall	Oral	13	67	26	6	0.72043	0.917808	0.807229
Bracken_208_25_refseq	Oral	13	72	108	1	0.4	0.986301	0.56917
MetaPhlAn v3.0 stat_q 0.2	Gastrointestinal tract	9	28	4	8	0.875	0.777778	0.823529
MetaPhlAn v3.0 stat_q 0.1	Gastrointestinal tract	9	28	7	8	0.8	0.777778	0.788732
MetaPhlAn2 v2.7	Gastrointestinal tract	9	22	8	14	0.733333	0.611111	0.666667
mOTUs251_precision	Gastrointestinal tract	9	31	1	5	0.96875	0.861111	0.911765
mOTUs251_recall	Gastrointestinal tract	9	36	13	0	0.734694	1	0.847059
Bracken_208_25_refseq	Gastrointestinal tract	9	36	61	0	0.371134	1	0.541353
MetaPhlAn v3.0 stat_q 0.2	Gastrointestinal tract	5	19	2	0	0.904762	1	0.95
MetaPhlAn v3.0 stat_q 0.1	Gastrointestinal tract	5	19	3	0	0.863636	1	0.926829
MetaPhlAn2 v2.7	Gastrointestinal tract	5	13	3	6	0.8125	0.684211	0.742857
mOTUs251_precision	Gastrointestinal tract	5	14	1	5	0.933333	0.736842	0.823529
mOTUs251_recall	Gastrointestinal tract	5	19	12	0	0.612903	1	0.76
Bracken_208_25_refseq	Gastrointestinal tract	5	19	97	0	0.163793	1	0.281481
MetaPhlAn v3.0 stat_q 0.2	Gastrointestinal tract	4	41	1	4	0.97619	0.911111	0.942529
MetaPhlAn v3.0 stat_q 0.1	Gastrointestinal tract	4	41	2	4	0.953488	0.911111	0.931818
MetaPhlAn2 v2.7	Gastrointestinal tract	4	28	7	17	0.8	0.622222	0.7
mOTUs251_precision	Gastrointestinal tract	4	39	3	6	0.928571	0.866667	0.896552
mOTUs251_recall	Gastrointestinal tract	4	45	16	0	0.737705	1	0.849057
Bracken_208_25_refseq	Gastrointestinal tract	4	45	71	0	0.387931	1	0.559006
MetaPhlAn v3.0 stat_q 0.2	Gastrointestinal tract	3	38	4	7	0.904762	0.844444	0.873563
MetaPhlAn v3.0 stat_q 0.1	Gastrointestinal tract	3	40	7	5	0.851064	0.888889	0.869565
MetaPhlAn2 v2.7	Gastrointestinal tract	3	32	9	13	0.780488	0.711111	0.744186
mOTUs251_precision	Gastrointestinal tract	3	32	8	13	0.8	0.711111	0.752941
mOTUs251_recall	Gastrointestinal tract	3	42	32	3	0.567568	0.933333	0.705882
Bracken_208_25_refseq	Gastrointestinal tract	3	45	99	0	0.3125	1	0.47619
MetaPhlAn v3.0 stat_q 0.2	Gastrointestinal tract	2	20	2	1	0.909091	0.952381	0.930233
MetaPhlAn v3.0 stat_q 0.1	Gastrointestinal tract	2	20	3	1	0.869565	0.952381	0.909091
MetaPhlAn2 v2.7	Gastrointestinal tract	2	17	4	4	0.809524	0.809524	0.809524
mOTUs251_precision	Gastrointestinal tract	2	15	4	6	0.789474	0.714286	0.75
mOTUs251_recall	Gastrointestinal tract	2	20	14	1	0.588235	0.952381	0.727273
Bracken_208_25_refseq	Gastrointestinal tract	2	20	110	1	0.153846	0.952381	0.264901
MetaPhlAn v3.0 stat_q 0.2	Gastrointestinal tract	12	24	3	2	0.888889	0.923077	0.90566
MetaPhlAn v3.0 stat_q 0.1	Gastrointestinal tract	12	24	3	2	0.888889	0.923077	0.90566
MetaPhlAn2 v2.7	Gastrointestinal tract	12	21	3	5	0.875	0.807692	0.84
mOTUs251_precision	Gastrointestinal tract	12	21	2	5	0.913043	0.807692	0.857143
mOTUs251_recall	Gastrointestinal tract	12	26	16	0	0.619048	1	0.764706
Bracken_208_25_refseq	Gastrointestinal tract	12	25	131	1	0.160256	0.961538	0.274725
MetaPhlAn v3.0 stat_q 0.2	Gastrointestinal tract	11	47	4	8	0.921569	0.854545	0.886792
MetaPhlAn v3.0 stat_q 0.1	Gastrointestinal tract	11	48	5	7	0.90566	0.872727	0.888889
MetaPhlAn2 v2.7	Gastrointestinal tract	11	42	10	13	0.807692	0.763636	0.785047
mOTUs251_precision	Gastrointestinal tract	11	39	1	16	0.975	0.709091	0.821053
mOTUs251_recall	Gastrointestinal tract	11	51	31	4	0.621951	0.927273	0.744526
Bracken_208_25_refseq	Gastrointestinal tract	11	55	64	0	0.462185	1	0.632184
MetaPhlAn v3.0 stat_q 0.2	Gastrointestinal tract	10	34	1	6	0.971429	0.85	0.906667
MetaPhlAn v3.0 stat_q 0.1	Gastrointestinal tract	10	35	5	5	0.875	0.875	0.875
MetaPhlAn2 v2.7	Gastrointestinal tract	10	30	5	10	0.857143	0.75	0.8
mOTUs251_precision	Gastrointestinal tract	10	32	4	8	0.888889	0.8	0.842105
mOTUs251_recall	Gastrointestinal tract	10	40	19	0	0.677966	1	0.808081
Bracken_208_25_refseq	Gastrointestinal tract	10	40	88	0	0.3125	1	0.47619
MetaPhlAn v3.0 stat_q 0.2	Gastrointestinal tract	1	37	3	1	0.925	0.973684	0.948718
MetaPhlAn v3.0 stat_q 0.1	Gastrointestinal tract	1	38	5	0	0.883721	1	0.938272
MetaPhlAn2 v2.7	Gastrointestinal tract	1	28	5	10	0.848485	0.736842	0.788732
mOTUs251_precision	Gastrointestinal tract	1	24	2	14	0.923077	0.631579	0.75
mOTUs251_recall	Gastrointestinal tract	1	38	34	0	0.527778	1	0.690909
Bracken_208_25_refseq	Gastrointestinal tract	1	38	132	0	0.223529	1	0.365385
MetaPhlAn v3.0 stat_q 0.2	Gastrointestinal tract	0	31	2	4	0.939394	0.885714	0.911765
MetaPhlAn v3.0 stat_q 0.1	Gastrointestinal tract	0	32	4	3	0.888889	0.914286	0.901408
MetaPhlAn2 v2.7	Gastrointestinal tract	0	23	5	12	0.821429	0.657143	0.730159
mOTUs251_precision	Gastrointestinal tract	0	27	3	8	0.9	0.771429	0.830769
mOTUs251_recall	Gastrointestinal tract	0	34	18	1	0.653846	0.971429	0.781609
Bracken_208_25_refseq	Gastrointestinal tract	0	35	108	0	0.244755	1	0.393258
MetaPhlAn v3.0 stat_q 0.2	Airways	9	83	9	10	0.902174	0.892473	0.897297
MetaPhlAn v3.0 stat_q 0.1	Airways	9	83	13	10	0.864583	0.892473	0.878307
MetaPhlAn2 v2.7	Airways	9	58	22	35	0.725	0.623656	0.67052
mOTUs251_precision	Airways	9	70	7	23	0.909091	0.752688	0.823529
mOTUs251_recall	Airways	9	90	55	3	0.62069	0.967742	0.756303
Bracken_208_25_refseq	Airways	9	91	116	2	0.439614	0.978495	0.606667
MetaPhlAn v3.0 stat_q 0.2	Airways	8	53	4	4	0.929825	0.929825	0.929825
MetaPhlAn v3.0 stat_q 0.1	Airways	8	53	5	4	0.913793	0.929825	0.921739
MetaPhlAn2 v2.7	Airways	8	33	8	24	0.804878	0.578947	0.673469
mOTUs251_precision	Airways	8	46	7	11	0.867925	0.807018	0.836364
mOTUs251_recall	Airways	8	56	39	1	0.589474	0.982456	0.736842
Bracken_208_25_refseq	Airways	8	57	103	0	0.35625	1	0.525346
MetaPhlAn v3.0 stat_q 0.2	Airways	7	64	4	11	0.941176	0.853333	0.895105
MetaPhlAn v3.0 stat_q 0.1	Airways	7	64	7	11	0.901408	0.853333	0.876712
MetaPhlAn2 v2.7	Airways	7	47	11	28	0.810345	0.626667	0.706767
mOTUs251_precision	Airways	7	51	2	24	0.962264	0.68	0.796875
mOTUs251_recall	Airways	7	72	73	3	0.496552	0.96	0.654545
Bracken_208_25_refseq	Airways	7	75	201	0	0.271739	1	0.42735
MetaPhlAn v3.0 stat_q 0.2	Airways	4	93	8	16	0.920792	0.853211	0.885714
MetaPhlAn v3.0 stat_q 0.1	Airways	4	93	14	16	0.869159	0.853211	0.861111
MetaPhlAn2 v2.7	Airways	4	63	13	46	0.828947	0.577982	0.681081
mOTUs251_precision	Airways	4	77	6	32	0.927711	0.706422	0.802083
mOTUs251_recall	Airways	4	100	70	9	0.588235	0.917431	0.716846
Bracken_208_25_refseq	Airways	4	109	166	0	0.396364	1	0.567708
MetaPhlAn v3.0 stat_q 0.2	Airways	27	80	8	10	0.909091	0.888889	0.898876
MetaPhlAn v3.0 stat_q 0.1	Airways	27	82	16	8	0.836735	0.911111	0.87234
MetaPhlAn2 v2.7	Airways	27	60	17	30	0.779221	0.666667	0.718563
mOTUs251_precision	Airways	27	58	8	32	0.878788	0.644444	0.74359
mOTUs251_recall	Airways	27	85	56	5	0.602837	0.944444	0.735931
Bracken_208_25_refseq	Airways	27	87	196	3	0.30742	0.966667	0.466488
MetaPhlAn v3.0 stat_q 0.2	Airways	26	61	4	10	0.938462	0.859155	0.897059
MetaPhlAn v3.0 stat_q 0.1	Airways	26	62	6	9	0.911765	0.873239	0.892086
MetaPhlAn2 v2.7	Airways	26	42	6	29	0.875	0.591549	0.705882
mOTUs251_precision	Airways	26	44	8	27	0.846154	0.619718	0.715447
mOTUs251_recall	Airways	26	67	78	4	0.462069	0.943662	0.62037
Bracken_208_25_refseq	Airways	26	69	209	2	0.248201	0.971831	0.395415
MetaPhlAn v3.0 stat_q 0.2	Airways	23	26	5	6	0.83871	0.8125	0.825397
MetaPhlAn v3.0 stat_q 0.1	Airways	23	27	5	5	0.84375	0.84375	0.84375
MetaPhlAn2 v2.7	Airways	23	23	2	9	0.92	0.71875	0.807018
mOTUs251_precision	Airways	23	16	0	16	1	0.5	0.666667
mOTUs251_recall	Airways	23	32	56	0	0.363636	1	0.533333
Bracken_208_25_refseq	Airways	23	31	209	1	0.129167	0.96875	0.227941
MetaPhlAn v3.0 stat_q 0.2	Airways	12	42	3	3	0.933333	0.933333	0.933333
MetaPhlAn v3.0 stat_q 0.1	Airways	12	42	9	3	0.823529	0.933333	0.875
MetaPhlAn2 v2.7	Airways	12	33	2	12	0.942857	0.733333	0.825
mOTUs251_precision	Airways	12	32	2	13	0.941176	0.711111	0.810127
mOTUs251_recall	Airways	12	43	17	2	0.716667	0.955556	0.819048
Bracken_208_25_refseq	Airways	12	45	105	0	0.3	1	0.461538
MetaPhlAn v3.0 stat_q 0.2	Airways	11	30	4	4	0.882353	0.882353	0.882353
MetaPhlAn v3.0 stat_q 0.1	Airways	11	30	5	4	0.857143	0.882353	0.869565
MetaPhlAn2 v2.7	Airways	11	21	5	13	0.807692	0.617647	0.7
mOTUs251_precision	Airways	11	21	5	13	0.807692	0.617647	0.7
mOTUs251_recall	Airways	11	34	43	0	0.441558	1	0.612613
Bracken_208_25_refseq	Airways	11	33	141	1	0.189655	0.970588	0.317308
MetaPhlAn v3.0 stat_q 0.2	Airways	10	63	5	6	0.926471	0.913043	0.919708
MetaPhlAn v3.0 stat_q 0.1	Airways	10	63	7	6	0.9	0.913043	0.906475
MetaPhlAn2 v2.7	Airways	10	44	6	25	0.88	0.637681	0.739496
mOTUs251_precision	Airways	10	48	6	21	0.888889	0.695652	0.780488
mOTUs251_recall	Airways	10	67	71	2	0.485507	0.971014	0.647343
Bracken_208_25_refseq	Airways	10	68	203	1	0.250923	0.985507	0.4
MetaPhlAn v3.0 stat_q 0.2	Non-human	nonhuman_866202	84	10	16	0.893617	0.84	0.865979
MetaPhlAn v3.0 stat_q 0.1	Non-human	nonhuman_866202	84	15	16	0.848485	0.84	0.844221
MetaPhlAn2 v2.7	Non-human	nonhuman_866202	26	29	74	0.472727	0.26	0.335484
mOTUs251_precision	Non-human	nonhuman_866202	50	15	50	0.769231	0.5	0.606061
mOTUs251_recall	Non-human	nonhuman_866202	72	115	28	0.385027	0.72	0.501742
Bracken_208_25_refseq	Non-human	nonhuman_866202	45	3793	55	0.0117249	0.45	0.0228542
MetaPhlAn v3.0 stat_q 0.2	Non-human	nonhuman_627063	83	9	17	0.902174	0.83	0.864583
MetaPhlAn v3.0 stat_q 0.1	Non-human	nonhuman_627063	85	23	15	0.787037	0.85	0.817308
MetaPhlAn2 v2.7	Non-human	nonhuman_627063	27	26	73	0.509434	0.27	0.352941
mOTUs251_precision	Non-human	nonhuman_627063	59	26	41	0.694118	0.59	0.637838
mOTUs251_recall	Non-human	nonhuman_627063	72	113	28	0.389189	0.72	0.505263
Bracken_208_25_refseq	Non-human	nonhuman_627063	40	3825	60	0.0103493	0.4	0.0201765
MetaPhlAn v3.0 stat_q 0.2	Non-human	nonhuman_543127	74	12	26	0.860465	0.74	0.795699
MetaPhlAn v3.0 stat_q 0.1	Non-human	nonhuman_543127	82	32	18	0.719298	0.82	0.766355
MetaPhlAn2 v2.7	Non-human	nonhuman_543127	23	22	77	0.511111	0.23	0.317241
mOTUs251_precision	Non-human	nonhuman_543127	45	18	55	0.714286	0.45	0.552147
mOTUs251_recall	Non-human	nonhuman_543127	68	146	32	0.317757	0.68	0.433121
Bracken_208_25_refseq	Non-human	nonhuman_543127	35	3731	65	0.00929368	0.35	0.0181066
MetaPhlAn v3.0 stat_q 0.2	Non-human	nonhuman_427767	88	12	12	0.88	0.88	0.88
MetaPhlAn v3.0 stat_q 0.1	Non-human	nonhuman_427767	94	26	6	0.783333	0.94	0.854545
MetaPhlAn2 v2.7	Non-human	nonhuman_427767	27	30	73	0.473684	0.27	0.343949
mOTUs251_precision	Non-human	nonhuman_427767	58	7	42	0.892308	0.58	0.70303
mOTUs251_recall	Non-human	nonhuman_427767	76	58	24	0.567164	0.76	0.649573
Bracken_208_25_refseq	Non-human	nonhuman_427767	50	3919	50	0.0125976	0.5	0.0245761
MetaPhlAn v3.0 stat_q 0.2	Non-human	nonhuman_134642	84	9	16	0.903226	0.84	0.870466
MetaPhlAn v3.0 stat_q 0.1	Non-human	nonhuman_134642	88	15	12	0.854369	0.88	0.866995
MetaPhlAn2 v2.7	Non-human	nonhuman_134642	25	42	75	0.373134	0.25	0.299401
mOTUs251_precision	Non-human	nonhuman_134642	61	24	39	0.717647	0.61	0.659459
mOTUs251_recall	Non-human	nonhuman_134642	77	101	23	0.432584	0.77	0.553957
Bracken_208_25_refseq	Non-human	nonhuman_134642	41	3778	59	0.0107358	0.41	0.0209237

## Sheet: Sheet4
Row Labels	Average of FP	StdDev of FP	Average of Recall	StdDev of Recall2	Sum of FP
Bracken_208_25_refseq	729.059	830.919	0.603861	0.332961	86029
MetaPhlAn v3.0 stat_q 0.1	13.6441	7.37462	0.754117	0.136429	1610
MetaPhlAn v3.0 stat_q 0.2	8.51695	5.12532	0.739906	0.139174	1005
MetaPhlAn2 v2.7	15.4492	9.05501	0.514596	0.14116	1823
mOTUs251_precision	9.00847	4.78333	0.690779	0.0717147	1063
mOTUs251_recall	39.0424	21.964	0.889564	0.0763707	4607
(blank)
Grand Total	135.787	430.079	0.698804	0.209262	96137
