# Supplementary material for: Integrating taxonomic, functional, and strain-level profiling of diverse microbial communities with bioBakery 3
Source: eLife. 2021 May 4;10:e65088. doi: 10.7554/eLife.65088 (PMC8096432; doi:10.7554/eLife.65088)
Supplement: Supplementary file 10. [file elife-65088-supp10.xlsx]

## Sheet: CRC_analysis_metadata_final_ver
dataset_name	sampleID	study_condition	age	age_category	gender	country	sequencing_platform	DNA_extraction_kit	PMID	antibiotics_current_use	disease_subtype	BMI	population	non_westernized	number_reads	number_bases	minimum_read_length	median_read_length	fobt	tnm	disease_stage	disease_location	NCBI_accession
GuptaA_2019	GupDM_JP	CRC	67	senior	male	IND	IlluminaNextSeq	Qiagen	31719139.0	no	adenocarcinoma	17.69	Bhopal	no	10400668.0	1428270555.0	60.0	150.0	yes	t3n2am0	3.0	rectum	SRR8865580
GuptaA_2019	GupDM_JG	CRC	71	senior	male	IND	IlluminaNextSeq	Qiagen	31719139.0	no	adenocarcinoma	18.07	Bhopal	no	8460528.0	1130086052.0	60.0	150.0	yes	t1n0m0	1.0	colon	SRR8865577
GuptaA_2019	GupDM_A4	CRC	72	senior	male	IND	IlluminaNextSeq	Qiagen	31719139.0	no	adenocarcinoma	18.22	Kerala	no	12005312.0	1619915370.0	60.0	150.0	yes	t3n2am0	3.0	colon	SRR8865593
GuptaA_2019	GupDM_JM	CRC	60	adult	male	IND	IlluminaNextSeq	Qiagen	31719139.0	no	adenocarcinoma	18.33	Bhopal	no	10328094.0	1435043694.0	60.0	150.0	yes	t2n0m0	1.0	rectum	SRR8865575
GuptaA_2019	GupDM_A13	CRC	48	adult	male	IND	IlluminaNextSeq	Qiagen	31719139.0	no	adenocarcinoma	18.69	Kerala	no	8067640.0	1118699109.0	60.0	150.0	yes	t3n0m0	2.0	rectum	SRR8865594
GuptaA_2019	GupDM_JK	CRC	66	senior	female	IND	IlluminaNextSeq	Qiagen	31719139.0	no	adenocarcinoma	18.73	Bhopal	no	10425236.0	1449671956.0	60.0	150.0	yes	t4n1m0	3.0	sigmoid colon	SRR8865573
GuptaA_2019	GupDM_JI	CRC	54	adult	male	IND	IlluminaNextSeq	Qiagen	31719139.0	no	adenocarcinoma	18.96	Bhopal	no	11460622.0	1547957943.0	60.0	150.0	yes	t2n0m0	1.0	colon	SRR8865579
GuptaA_2019	GupDM_A7	CRC	59	adult	male	IND	IlluminaNextSeq	Qiagen	31719139.0	no	adenocarcinoma	19.1	Kerala	no	7268266.0	939363261.0	60.0	150.0	yes	t4an2bm0	3.0	sigmoid colon	SRR8865586
GuptaA_2019	GupDM_A2	CRC	55	adult	male	IND	IlluminaNextSeq	Qiagen	31719139.0	no	adenocarcinoma	19.14	Kerala	no	7916638.0	1100929747.0	60.0	150.0	yes	t3n2am0	3.0	sigmoid colon	SRR8865597
GuptaA_2019	GupDM_A_11	CRC	41	adult	female	IND	IlluminaNextSeq	Qiagen	31719139.0	no	adenocarcinoma	19.22	Kerala	no	6227234.0	883347281.0	60.0	151.0	yes	t2m0n0	1.0	rectum	SRR8865600
GuptaA_2019	GupDM_JC	CRC	61	adult	male	IND	IlluminaNextSeq	Qiagen	31719139.0	no	adenocarcinoma	19.47	Bhopal	no	7854080.0	1057890138.0	60.0	150.0	yes	t3n2am0	3.0	colon	SRR8865591
GuptaA_2019	GupDM_JN	CRC	58	adult	male	IND	IlluminaNextSeq	Qiagen	31719139.0	no	adenocarcinoma	19.92	Bhopal	no	9789278.0	1347588954.0	60.0	150.0	yes	t2n0m0	1.0	rectum	SRR8865574
GuptaA_2019	GupDM_JJ	CRC	62	adult	female	IND	IlluminaNextSeq	Qiagen	31719139.0	no	adenocarcinoma	20.03	Bhopal	no	8350184.0	1151783466.0	60.0	150.0	yes	t2n0m1	4.0	colon	SRR8865578
GuptaA_2019	GupDM_JO	CRC	71	senior	male	IND	IlluminaNextSeq	Qiagen	31719139.0	no	adenocarcinoma	20.03	Bhopal	no	11274338.0	1501226163.0	60.0	150.0	yes	t4n1m0	3.0	sigmoid colon	SRR8865581
GuptaA_2019	GupDM_A1	CRC	62	adult	male	IND	IlluminaNextSeq	Qiagen	31719139.0	no	adenocarcinoma	20.08	Kerala	no	27687226.0	3808647004.0	60.0	150.0	yes	t2n0m0	1.0	rectum	SRR8865598
GuptaA_2019	GupDM_JE	CRC	64	adult	male	IND	IlluminaNextSeq	Qiagen	31719139.0	no	adenocarcinoma	20.08	Bhopal	no	6825048.0	920913556.0	60.0	150.0	yes	t1n0m0	1.0	rectum	SRR8865583
GuptaA_2019	GupDM_A12	CRC	65	adult	male	IND	IlluminaNextSeq	Qiagen	31719139.0	no	adenocarcinoma	20.32	Kerala	no	6988838.0	984235167.0	60.0	150.0	yes	pt2n2m0	3.0	rectum	SRR8865601
GuptaA_2019	GupDM_JL	CRC	59	adult	female	IND	IlluminaNextSeq	Qiagen	31719139.0	no	adenocarcinoma	20.34	Bhopal	no	9878044.0	1387793557.0	60.0	151.0	yes	t4n1m0	3.0	rectum	SRR8865572
GuptaA_2019	GupDM_A14	CRC	56	adult	male	IND	IlluminaNextSeq	Qiagen	31719139.0	no	adenocarcinoma	20.45	Kerala	no	10038762.0	1413415112.0	60.0	151.0	yes	t4n1m0	3.0	rectum	SRR8865595
GuptaA_2019	GupDM_A8	CRC	66	senior	female	IND	IlluminaNextSeq	Qiagen	31719139.0	no	adenocarcinoma	20.5	Kerala	no	11368644.0	1560459053.0	60.0	150.0	yes	t1n0m0	1.0	colon	SRR8865587
GuptaA_2019	GupDM_A3	CRC	49	adult	male	IND	IlluminaNextSeq	Qiagen	31719139.0	no	adenocarcinoma	20.83	Kerala	no	3283982.0	456791391.0	60.0	150.0	yes	t4n1m0	3.0	colon	SRR8865592
GuptaA_2019	GupDM_A10	CRC	65	adult	female	IND	IlluminaNextSeq	Qiagen	31719139.0	no	adenocarcinoma	21.01	Kerala	no	8468208.0	1174245166.0	60.0	150.0	yes	t3n2am0	3.0	colon	SRR8865599
GuptaA_2019	GupDM_A5	CRC	75	senior	female	IND	IlluminaNextSeq	Qiagen	31719139.0	no	adenocarcinoma	21.21	Kerala	no	7220182.0	997921511.0	60.0	150.0	yes	t3n2am0	3.0	rectum	SRR8865584
GuptaA_2019	GupDM_A_15	CRC	59	adult	male	IND	IlluminaNextSeq	Qiagen	31719139.0	no	adenocarcinoma	21.4	Kerala	no	9884266.0	1384530792.0	60.0	150.0	yes	t2n0m0	1.0	rectum	SRR8865596
GuptaA_2019	GupDM_JH	CRC	58	adult	female	IND	IlluminaNextSeq	Qiagen	31719139.0	no	adenocarcinoma	21.49	Bhopal	no	12994616.0	1753239492.0	60.0	150.0	yes	t4n1m0	3.0	sigmoid colon	SRR8865576
GuptaA_2019	GupDM_JD	CRC	57	adult	male	IND	IlluminaNextSeq	Qiagen	31719139.0	no	adenocarcinoma	21.7	Bhopal	no	5660024.0	780426560.0	60.0	150.0	yes	t1n0m0	1.0	colon	SRR8865582
GuptaA_2019	GupDM_A9	CRC	56	adult	female	IND	IlluminaNextSeq	Qiagen	31719139.0	no	adenocarcinoma	22.22	Kerala	no	4665104.0	661492622.0	60.0	151.0	yes	t4n1m0	3.0	rectum	SRR8865588
GuptaA_2019	GupDM_A6	CRC	58	adult	female	IND	IlluminaNextSeq	Qiagen	31719139.0	no	adenocarcinoma	22.67	Kerala	no	8086526.0	1064744495.0	60.0	150.0	yes	t4n1m0	3.0	sigmoid colon	SRR8865585
GuptaA_2019	GupDM_JB	CRC	53	adult	female	IND	IlluminaNextSeq	Qiagen	31719139.0	no	adenocarcinoma	22.97	Bhopal	no	6436176.0	882523087.0	60.0	150.0	yes	t4n1m0	3.0	rectum	SRR8865590
GuptaA_2019	GupDM_JA	CRC	47	adult	female	IND	IlluminaNextSeq	Qiagen	31719139.0	no	adenocarcinoma	23.81	Bhopal	no	7561246.0	1040725254.0	60.0	150.0	yes	t1n0m0	1.0	rectum	SRR8865589
GuptaA_2019	GupDM_HAK	control	29	adult	female	IND	IlluminaNextSeq	Qiagen	30698687.0	no	NA	22.03	Bhopal	no	10655514.0	1344200520.0	32.0	150.0	NA	NA	NA	NA	SRR5898908
GuptaA_2019	GupDM_HAJ	control	22	adult	female	IND	IlluminaNextSeq	Qiagen	30698687.0	no	NA	23.23	Bhopal	no	6171104.0	773772009.0	32.0	150.0	NA	NA	NA	NA	SRR5898909
GuptaA_2019	GupDM_HAI	control	24	adult	male	IND	IlluminaNextSeq	Qiagen	30698687.0	no	NA	26.03	Bhopal	no	17519102.0	2142440783.0	35.0	149.0	NA	NA	NA	NA	SRR5898910
GuptaA_2019	GupDM_HAH	control	25	adult	female	IND	IlluminaNextSeq	Qiagen	30698687.0	no	NA	21.26	Bhopal	no	10271966.0	1316013844.0	32.0	150.0	NA	NA	NA	NA	SRR5898911
GuptaA_2019	GupDM_HAG	control	23	adult	female	IND	IlluminaNextSeq	Qiagen	30698687.0	no	NA	22.3	Bhopal	no	8105478.0	1036575018.0	32.0	150.0	NA	NA	NA	NA	SRR5898912
GuptaA_2019	GupDM_HAL	control	24	adult	female	IND	IlluminaNextSeq	Qiagen	30698687.0	no	NA	23.25	Bhopal	no	9271322.0	1203927125.0	35.0	150.0	NA	NA	NA	NA	SRR5898920
GuptaA_2019	GupDM_HAM	control	23	adult	female	IND	IlluminaNextSeq	Qiagen	30698687.0	no	NA	19.22	Bhopal	no	12979624.0	1688320620.0	35.0	150.0	NA	NA	NA	NA	SRR5898921
GuptaA_2019	GupDM_HAN	control	26	adult	female	IND	IlluminaNextSeq	Qiagen	30698687.0	no	NA	22.03	Bhopal	no	13145190.0	1696663348.0	35.0	150.0	NA	NA	NA	NA	SRR5898922
GuptaA_2019	GupDM_HAO	control	26	adult	female	IND	IlluminaNextSeq	Qiagen	30698687.0	no	NA	20.82	Bhopal	no	16932172.0	2103248766.0	35.0	150.0	NA	NA	NA	NA	SRR5898923
GuptaA_2019	GupDM_HAP	control	25	adult	male	IND	IlluminaNextSeq	Qiagen	30698687.0	no	NA	21.71	Bhopal	no	12355776.0	1610417458.0	35.0	150.0	NA	NA	NA	NA	SRR5898924
GuptaA_2019	GupDM_HAR	control	28	adult	male	IND	IlluminaNextSeq	Qiagen	30698687.0	no	NA	25.51	Bhopal	no	10185816.0	1327594148.0	35.0	150.0	NA	NA	NA	NA	SRR5898925
GuptaA_2019	GupDM_HAT	control	26	adult	male	IND	IlluminaNextSeq	Qiagen	30698687.0	no	NA	22.65	Bhopal	no	5952458.0	802869306.0	35.0	150.0	NA	NA	NA	NA	SRR5898926
GuptaA_2019	GupDM_HDF	control	58	adult	female	IND	IlluminaNextSeq	Qiagen	30698687.0	no	NA	25.7	Kerala	no	7376354.0	1037368291.0	35.0	151.0	NA	NA	NA	NA	SRR5898948
GuptaA_2019	GupDM_HDB	control	50	adult	female	IND	IlluminaNextSeq	Qiagen	30698687.0	no	NA	25.1	Kerala	no	4717922.0	668018094.0	35.0	151.0	NA	NA	NA	NA	SRR5898950
GuptaA_2019	GupDM_HCY	control	53	adult	female	IND	IlluminaNextSeq	Qiagen	30698687.0	no	NA	26.8	Kerala	no	5247522.0	742418100.0	35.0	151.0	NA	NA	NA	NA	SRR5898954
GuptaA_2019	GupDM_HCL	control	64	adult	female	IND	IlluminaNextSeq	Qiagen	30698687.0	no	NA	36.4	Bhopal	no	7355758.0	1016781080.0	35.0	150.0	NA	NA	NA	NA	SRR5898966
GuptaA_2019	GupDM_HCU	control	61	adult	male	IND	IlluminaNextSeq	Qiagen	30698687.0	no	NA	19.5	Bhopal	no	11104842.0	1433920763.0	35.0	150.0	NA	NA	NA	NA	SRR5898978
GuptaA_2019	GupDM_HCV	control	58	adult	female	IND	IlluminaNextSeq	Qiagen	30698687.0	no	NA	19.9	Bhopal	no	10996252.0	1517224723.0	35.0	150.0	NA	NA	NA	NA	SRR5898979
GuptaA_2019	GupDM_HCQ	control	52	adult	female	IND	IlluminaNextSeq	Qiagen	30698687.0	no	NA	23.0	Bhopal	no	5635222.0	793309934.0	35.0	150.0	NA	NA	NA	NA	SRR5898980
GuptaA_2019	GupDM_HCR	control	62	adult	male	IND	IlluminaNextSeq	Qiagen	30698687.0	no	NA	20.8	Bhopal	no	6710528.0	937125039.0	35.0	150.0	NA	NA	NA	NA	SRR5898981
GuptaA_2019	GupDM_HCS	control	50	adult	female	IND	IlluminaNextSeq	Qiagen	30698687.0	no	NA	17.9	Bhopal	no	5521326.0	754584053.0	35.0	150.0	NA	NA	NA	NA	SRR5898982
GuptaA_2019	GupDM_HCT	control	58	adult	male	IND	IlluminaNextSeq	Qiagen	30698687.0	no	NA	19.2	Bhopal	no	9651384.0	1363678978.0	35.0	150.0	NA	NA	NA	NA	SRR5898983
GuptaA_2019	GupDM_HCM	control	62	adult	female	IND	IlluminaNextSeq	Qiagen	30698687.0	no	NA	22.9	Bhopal	no	7352590.0	1010009755.0	35.0	150.0	NA	NA	NA	NA	SRR5898984
GuptaA_2019	GupDM_HCN	control	57	adult	male	IND	IlluminaNextSeq	Qiagen	30698687.0	no	NA	17.9	Bhopal	no	10142394.0	1313430561.0	35.0	150.0	NA	NA	NA	NA	SRR5898985
GuptaA_2019	GupDM_HCO	control	57	adult	female	IND	IlluminaNextSeq	Qiagen	30698687.0	no	NA	20.8	Bhopal	no	9242932.0	1256070078.0	35.0	150.0	NA	NA	NA	NA	SRR5898986
GuptaA_2019	GupDM_HCP	control	71	senior	male	IND	IlluminaNextSeq	Qiagen	30698687.0	no	NA	19.2	Bhopal	no	6704578.0	914569895.0	35.0	150.0	NA	NA	NA	NA	SRR5898987
GuptaA_2019	GupDM_HP	control	30	adult	male	IND	IlluminaNextSeq	Qiagen	30698687.0	no	NA	19.36	Bhopal	no	9276878.0	1156488365.0	32.0	150.0	NA	NA	NA	NA	SRR5899005
GuptaA_2019	GupDM_HS	control	25	adult	male	IND	IlluminaNextSeq	Qiagen	30698687.0	no	NA	18.3	Bhopal	no	13442182.0	1677800044.0	32.0	150.0	NA	NA	NA	NA	SRR5899006
GuptaA_2019	GupDM_HR	control	26	adult	male	IND	IlluminaNextSeq	Qiagen	30698687.0	no	NA	22.22	Bhopal	no	8951472.0	1153088906.0	32.0	150.0	NA	NA	NA	NA	SRR5899007
GuptaA_2019	GupDM_HBR	control	50	adult	female	IND	IlluminaNextSeq	Qiagen	30698687.0	no	NA	27.1	Kerala	no	4251494.0	616943354.0	35.0	151.0	NA	NA	NA	NA	SRR5899017
ZellerG_2014	CCIS00146684ST-4-0	control	72	senior	female	FRA	IlluminaHiSeq	Gnome	25432777.0	NA	NA	25.0	NA	no	76003628.0	6512170482.0	45.0	91.0	no	NA	NA	NA	ERR480457;ERR480456;ERR480455;ERR480454;ERR478959;ERR478958;ERR478960;ERR478961
ZellerG_2014	CCIS00281083ST-3-0	control	53	adult	male	FRA	IlluminaHiSeq	Gnome	25432777.0	NA	NA	32.0	NA	no	47190574.0	3298640533.0	45.0	69.0	no	NA	NA	NA	ERR480459;ERR480458;ERR478962;ERR478963
ZellerG_2014	CCIS02124300ST-4-0	control	35	adult	male	FRA	IlluminaHiSeq	Gnome	25432777.0	NA	NA	23.0	NA	no	87631061.0	7846466205.0	45.0	94.0	no	NA	NA	NA	ERR480463;ERR480462;ERR480461;ERR480460;ERR478967;ERR478966;ERR478965;ERR478964
ZellerG_2014	CCIS02379307ST-4-0	CRC	67	senior	male	FRA	IlluminaHiSeq	Gnome	25432777.0	NA	carcinoma	28.0	NA	no	10574044.0	907920835.0	1.0	90.0	yes	t1n0m0	NA	NA	ERR480465;ERR480464;ERR478969;ERR478968
ZellerG_2014	CCIS02856720ST-4-0	control	74	senior	male	FRA	IlluminaHiSeq	Gnome	25432777.0	NA	NA	27.0	NA	no	73567419.0	6190369807.0	1.0	89.0	yes	NA	NA	NA	ERR480469;ERR480468;ERR480467;ERR480466;ERR478973;ERR478972;ERR478971;ERR478970
ZellerG_2014	CCIS03473770ST-4-0	control	29	adult	male	FRA	IlluminaHiSeq	Gnome	25432777.0	NA	NA	24.0	NA	no	46217866.0	3733212784.0	45.0	91.0	no	NA	NA	NA	ERR480471;ERR480470;ERR478975;ERR478974
ZellerG_2014	CCIS03857607ST-4-0	control	61	adult	male	FRA	IlluminaHiSeq	Gnome	25432777.0	NA	NA	23.0	NA	no	63911163.0	5403961311.0	1.0	89.0	no	NA	NA	NA	ERR480475;ERR480473;ERR480472;ERR480474;ERR478976;ERR478979;ERR478978;ERR478977
ZellerG_2014	CCIS05314658ST-4-0	control	65	adult	female	FRA	IlluminaHiSeq	Gnome	25432777.0	NA	NA	24.0	NA	no	61688036.0	5175146179.0	1.0	89.0	no	NA	NA	NA	ERR480479;ERR480478;ERR480477;ERR480476;ERR478980;ERR478983;ERR478982;ERR478981
ZellerG_2014	CCIS06260551ST-3-0	CRC	58	adult	male	FRA	IlluminaHiSeq	Gnome	25432777.0	NA	carcinoma	24.0	NA	no	36441111.0	2826425982.0	45.0	85.0	no	t3n1m1	NA	NA	ERR480480;ERR480481;ERR478984;ERR478985
ZellerG_2014	CCIS07277498ST-4-0	control	63	adult	male	FRA	IlluminaHiSeq	Gnome	25432777.0	NA	NA	NA	NA	no	66936604.0	5667757614.0	1.0	89.0	NA	NA	NA	NA	ERR480485;ERR480484;ERR480482;ERR480483;ERR478989;ERR478988;ERR478987;ERR478986
ZellerG_2014	CCIS07539127ST-4-0	control	77	senior	female	FRA	IlluminaHiSeq	Gnome	25432777.0	NA	NA	22.0	NA	no	68406226.0	5817465348.0	45.0	90.0	no	NA	NA	NA	ERR480489;ERR480488;ERR480487;ERR480486;ERR478993;ERR478992;ERR478991;ERR478990
ZellerG_2014	CCIS07648107ST-4-0	control	62	adult	female	FRA	IlluminaHiSeq	Gnome	25432777.0	NA	NA	21.0	NA	no	66245949.0	5739043252.0	45.0	91.0	no	NA	NA	NA	ERR480493;ERR480492;ERR480491;ERR480490;ERR478997;ERR478996;ERR478994;ERR478995
ZellerG_2014	CCIS09568613ST-4-0	control	67	senior	male	FRA	IlluminaHiSeq	Gnome	25432777.0	NA	NA	21.0	NA	no	75876874.0	6488989235.0	45.0	91.0	no	NA	NA	NA	ERR480499;ERR480498;ERR480497;ERR480496;ERR479001;ERR479000;ERR479003;ERR479002
ZellerG_2014	CCIS10706551ST-3-0	control	25	adult	male	FRA	IlluminaHiSeq	Gnome	25432777.0	NA	NA	24.0	NA	no	65983849.0	5152050233.0	1.0	89.0	no	NA	NA	NA	ERR480501;ERR480500;ERR479004;ERR479005
ZellerG_2014	CCIS11015875ST-4-0	CRC	62	adult	male	FRA	IlluminaHiSeq	Gnome	25432777.0	NA	carcinoma	26.0	NA	no	57428555.0	5021042144.0	45.0	92.0	yes	t3n1m0	NA	NA	ERR480507;ERR480506;ERR479011;ERR479010
ZellerG_2014	CCIS11354283ST-4-0	control	67	senior	male	FRA	IlluminaHiSeq	Gnome	25432777.0	NA	NA	27.0	NA	no	62234037.0	5296232853.0	45.0	91.0	no	NA	NA	NA	ERR480513;ERR480512;ERR480511;ERR480510;ERR479017;ERR479016;ERR479015;ERR479014
ZellerG_2014	CCIS11362406ST-4-0	control	44	adult	female	FRA	IlluminaHiSeq	Gnome	25432777.0	NA	NA	26.0	NA	no	103363989.0	8334068161.0	1.0	89.0	no	NA	NA	NA	ERR480516;ERR480515;ERR480514;ERR480517;ERR479021;ERR479018;ERR479020;ERR479019
ZellerG_2014	CCIS11558985ST-4-0	control	56	adult	female	FRA	IlluminaHiSeq	Gnome	25432777.0	NA	NA	NA	NA	no	37988049.0	3229069072.0	45.0	92.0	no	NA	NA	NA	ERR480519;ERR480518;ERR479023;ERR479022
ZellerG_2014	CCIS12370844ST-4-0	CRC	81	senior	female	FRA	IlluminaHiSeq	Gnome	25432777.0	NA	carcinoma	39.0	NA	no	5783578.0	497672074.0	45.0	94.0	yes	t2n0m0	NA	NA	ERR480524;ERR480523;ERR480522;ERR480521;ERR480520;ERR479028;ERR479027;ERR479025;ERR479024;ERR479026
ZellerG_2014	CCIS12656533ST-4-0	CRC	51	adult	male	FRA	IlluminaHiSeq	Gnome	25432777.0	NA	carcinoma	30.0	NA	no	45546920.0	3848992468.0	45.0	92.0	no	t2n1m1	NA	NA	ERR480528;ERR480527;ERR480526;ERR480525;ERR479032;ERR479030;ERR479029;ERR479031
ZellerG_2014	CCIS13047523ST-4-0	control	70	senior	male	FRA	IlluminaHiSeq	Gnome	25432777.0	NA	NA	22.0	NA	no	62891719.0	5363998665.0	45.0	90.0	no	NA	NA	NA	ERR480532;ERR480529;ERR480531;ERR480530;ERR479036;ERR479034;ERR479035;ERR479033
ZellerG_2014	CCIS14449628ST-4-0	CRC	59	adult	female	FRA	IlluminaHiSeq	Gnome	25432777.0	NA	carcinoma	20.0	NA	no	51748595.0	4256129777.0	45.0	92.0	no	t4n1m0	NA	NA	ERR480534;ERR480533;ERR479038;ERR479037
ZellerG_2014	CCIS15704761ST-4-0	CRC	56	adult	female	FRA	IlluminaHiSeq	Gnome	25432777.0	NA	carcinoma	NA	NA	no	42764985.0	3631882002.0	45.0	93.0	no	t4n1m1	NA	NA	ERR480536;ERR480535;ERR479040;ERR479039
ZellerG_2014	CCIS15794887ST-4-0	control	37	adult	female	FRA	IlluminaHiSeq	Gnome	25432777.0	NA	NA	18.0	NA	no	45764894.0	3698892069.0	45.0	92.0	no	NA	NA	NA	ERR480538;ERR480537;ERR479042;ERR479041
ZellerG_2014	CCIS16326685ST-4-0	control	46	adult	female	FRA	IlluminaHiSeq	Gnome	25432777.0	NA	NA	29.0	NA	no	53344597.0	4547422592.0	45.0	96.0	no	NA	NA	NA	ERR480540;ERR480539;ERR479043;ERR479044
ZellerG_2014	CCIS16383318ST-4-0	control	61	adult	female	FRA	IlluminaHiSeq	Gnome	25432777.0	NA	NA	24.0	NA	no	78085760.0	6621569027.0	45.0	90.0	no	NA	NA	NA	ERR480541;ERR480544;ERR480543;ERR480542;ERR479045;ERR479048;ERR479047;ERR479046
ZellerG_2014	CCIS16561622ST-4-0	control	54	adult	male	FRA	IlluminaHiSeq	Gnome	25432777.0	NA	NA	26.0	NA	no	87807063.0	7453752248.0	45.0	90.0	no	NA	NA	NA	ERR480548;ERR480547;ERR480546;ERR480545;ERR479052;ERR479051;ERR479050;ERR479049
ZellerG_2014	CCIS17669415ST-4-0	CRC	72	senior	female	FRA	IlluminaHiSeq	Gnome	25432777.0	NA	carcinoma	37.0	NA	no	69983469.0	5754783062.0	45.0	90.0	no	t1n0m0	NA	NA	ERR480552;ERR480551;ERR480550;ERR480549;ERR479056;ERR479054;ERR479053;ERR479055
ZellerG_2014	CCIS20795251ST-4-0	control	71	senior	female	FRA	IlluminaHiSeq	Gnome	25432777.0	NA	NA	23.0	NA	no	55286215.0	4611051584.0	1.0	89.0	no	NA	NA	NA	ERR480556;ERR480558;ERR480557;ERR480555;ERR479062;ERR479061;ERR479060;ERR479059
ZellerG_2014	CCIS21126322ST-4-0	control	59	adult	male	FRA	IlluminaHiSeq	Gnome	25432777.0	NA	NA	25.0	NA	no	82207625.0	6704190994.0	45.0	91.0	no	NA	NA	NA	ERR480560;ERR480559;ERR479064;ERR479063
ZellerG_2014	CCIS21278152ST-4-0	CRC	63	adult	male	FRA	IlluminaHiSeq	Gnome	25432777.0	NA	carcinoma	25.0	NA	no	53183717.0	4306955793.0	45.0	91.0	yes	t3n0m0	NA	NA	ERR480562;ERR480561;ERR479066;ERR479065
ZellerG_2014	CCIS22416007ST-4-0	CRC	82	senior	male	FRA	IlluminaHiSeq	Gnome	25432777.0	NA	carcinoma	24.0	NA	no	90417909.0	7567990129.0	1.0	89.0	no	t4n1m1	NA	NA	ERR480569;ERR480570;ERR480568;ERR480567;ERR479074;ERR479073;ERR479072;ERR479071
ZellerG_2014	CCIS22958137ST-20-0	CRC	60	adult	male	FRA	IlluminaHiSeq	Gnome	25432777.0	NA	carcinoma	26.0	NA	no	98059549.0	8757847513.0	45.0	95.0	yes	t4n1m1	NA	NA	ERR480573;ERR480574;ERR479078;ERR479077
ZellerG_2014	CCIS23164343ST-4-0	control	62	adult	male	FRA	IlluminaHiSeq	Gnome	25432777.0	NA	NA	23.0	NA	no	68712649.0	5871764899.0	45.0	90.0	no	NA	NA	NA	ERR480577;ERR480575;ERR480578;ERR480576;ERR479081;ERR479080;ERR479082;ERR479079
ZellerG_2014	CCIS24254057ST-4-0	CRC	69	senior	female	FRA	IlluminaHiSeq	Gnome	25432777.0	NA	carcinoma	24.0	NA	no	133597487.0	11694061283.0	45.0	96.0	no	t4n1m1	NA	NA	ERR480579;ERR480580;ERR479084;ERR479083
ZellerG_2014	CCIS27304052ST-3-0	control	52	adult	female	FRA	IlluminaHiSeq	Gnome	25432777.0	NA	NA	20.0	NA	no	48552680.0	3405411697.0	45.0	69.0	no	NA	NA	NA	ERR480588;ERR480587;ERR479092;ERR479091
ZellerG_2014	CCIS27927933ST-4-0	control	72	senior	male	FRA	IlluminaHiSeq	Gnome	25432777.0	NA	NA	24.0	NA	no	97043260.0	7788532840.0	5.0	85.0	no	NA	NA	NA	ERR480592;ERR480591;ERR480590;ERR480589;ERR479095;ERR479096;ERR479094;ERR479093
ZellerG_2014	CCIS29210128ST-4-0	control	64	adult	male	FRA	IlluminaHiSeq	Gnome	25432777.0	NA	NA	27.0	NA	no	48275455.0	3986872657.0	45.0	92.0	no	NA	NA	NA	ERR480596;ERR480595;ERR479100;ERR479099
ZellerG_2014	CCIS29688262ST-20-0	control	50	adult	male	FRA	IlluminaHiSeq	Gnome	25432777.0	NA	NA	25.0	NA	no	81666867.0	7382792447.0	45.0	96.0	no	NA	NA	NA	ERR480598;ERR480597;ERR479101;ERR479102
ZellerG_2014	CCIS32452666ST-4-0	control	68	senior	male	FRA	IlluminaHiSeq	Gnome	25432777.0	NA	NA	26.0	NA	no	53858804.0	4440407460.0	45.0	91.0	no	NA	NA	NA	ERR480606;ERR480604;ERR480605;ERR480603;ERR479107;ERR479110;ERR479109;ERR479108
ZellerG_2014	CCIS33816588ST-4-0	CRC	64	adult	male	FRA	IlluminaHiSeq	Gnome	25432777.0	NA	carcinoma	21.0	NA	no	64242756.0	5678829952.0	45.0	96.0	yes	t3n1m0	NA	NA	ERR480609;ERR480608;ERR480607;ERR480610;ERR479114;ERR479113;ERR479112;ERR479111
ZellerG_2014	CCIS34055159ST-4-0	CRC	80	senior	male	FRA	IlluminaHiSeq	Gnome	25432777.0	NA	carcinoma	29.0	NA	no	46734542.0	3943928884.0	45.0	92.0	yes	t2n0m0	NA	NA	ERR480612;ERR480611;ERR480613;ERR479115;ERR479117;ERR479116
ZellerG_2014	CCIS34604008ST-4-0	control	63	adult	female	FRA	IlluminaHiSeq	Gnome	25432777.0	NA	NA	27.0	NA	no	71147118.0	6044922649.0	1.0	89.0	no	NA	NA	NA	ERR480615;ERR480614;ERR480617;ERR480616;ERR479120;ERR479118;ERR479119;ERR479121
ZellerG_2014	CCIS35100175ST-4-0	CRC	73	senior	male	FRA	IlluminaHiSeq	Gnome	25432777.0	NA	carcinoma	40.0	NA	no	54177103.0	4449210952.0	45.0	91.0	no	t1n0m0	NA	NA	ERR480622;ERR480621;ERR480620;ERR480623;ERR479125;ERR479124;ERR479127;ERR479126
ZellerG_2014	CCIS36699628ST-4-0	control	68	senior	female	FRA	IlluminaHiSeq	Gnome	25432777.0	NA	NA	25.0	NA	no	66456701.0	5731938297.0	45.0	91.0	no	NA	NA	NA	ERR480627;ERR480626;ERR480625;ERR480624;ERR479131;ERR479130;ERR479129;ERR479128
ZellerG_2014	CCIS36797902ST-4-0	control	63	adult	male	FRA	IlluminaHiSeq	Gnome	25432777.0	NA	NA	25.0	NA	no	43056463.0	3608044435.0	45.0	90.0	no	NA	NA	NA	ERR480629;ERR480628;ERR480631;ERR480630;ERR479135;ERR479132;ERR479134;ERR479133
ZellerG_2014	CCIS38765456ST-20-0	CRC	79	senior	female	FRA	IlluminaHiSeq	Gnome	25432777.0	NA	carcinoma	22.0	NA	no	81682982.0	7211705897.0	45.0	95.0	yes	t4n1m1	NA	NA	ERR480635;ERR480634;ERR479139;ERR479138
ZellerG_2014	CCIS40244499ST-3-0	CRC	87	senior	female	FRA	IlluminaHiSeq	Gnome	25432777.0	NA	carcinoma	32.0	NA	no	55812127.0	4411570203.0	1.0	89.0	no	t4n0m0	NA	NA	ERR480637;ERR480636;ERR479140;ERR479141
ZellerG_2014	CCIS41222843ST-4-0	CRC	73	senior	female	FRA	IlluminaHiSeq	Gnome	25432777.0	NA	carcinoma	24.0	NA	no	90240238.0	7602125134.0	1.0	89.0	no	t3n1m0	NA	NA	ERR480640;ERR480639;ERR480638;ERR480641;ERR479143;ERR479142;ERR479144;ERR479145
ZellerG_2014	CCIS41288781ST-4-0	CRC	74	senior	female	FRA	IlluminaHiSeq	Gnome	25432777.0	NA	carcinoma	19.0	NA	no	44391860.0	3791242240.0	45.0	92.0	no	t3n0m0	NA	NA	ERR480643;ERR480642;ERR479147;ERR479146
ZellerG_2014	CCIS41548810ST-4-0	CRC	78	senior	male	FRA	IlluminaHiSeq	Gnome	25432777.0	NA	carcinoma	19.0	NA	no	55469214.0	4694864212.0	45.0	91.0	yes	t3n0m1	NA	NA	ERR480644;ERR480645;ERR479148;ERR479149
ZellerG_2014	CCIS41692898ST-4-0	control	67	senior	female	FRA	IlluminaHiSeq	Gnome	25432777.0	NA	NA	28.0	NA	no	75046271.0	6490271467.0	45.0	90.0	no	NA	NA	NA	ERR480649;ERR480648;ERR480647;ERR480646;ERR479151;ERR479150;ERR479153;ERR479152
ZellerG_2014	CCIS44093303ST-4-0	control	62	adult	female	FRA	IlluminaHiSeq	Gnome	25432777.0	NA	NA	20.0	NA	no	73343518.0	6267951889.0	45.0	90.0	yes	NA	NA	NA	ERR480654;ERR480653;ERR480655;ERR480656;ERR479160;ERR479159;ERR479158;ERR479157
ZellerG_2014	CCIS44757994ST-4-0	CRC	75	senior	male	FRA	IlluminaHiSeq	Gnome	25432777.0	NA	carcinoma	37.0	NA	no	49916410.0	4076256445.0	2.0	88.0	no	t3n1m0	NA	NA	ERR480662;ERR480661;ERR479166;ERR479165
ZellerG_2014	CCIS45571137ST-3-0	control	55	adult	female	FRA	IlluminaHiSeq	Gnome	25432777.0	NA	NA	20.0	NA	no	37805003.0	2643933782.0	45.0	69.0	no	NA	NA	NA	ERR480664;ERR480663;ERR479167;ERR479168
ZellerG_2014	CCIS45793747ST-4-0	control	67	senior	male	FRA	IlluminaHiSeq	Gnome	25432777.0	NA	NA	25.0	NA	no	84805529.0	7119073064.0	1.0	89.0	no	NA	NA	NA	ERR480668;ERR480666;ERR480665;ERR480667;ERR479172;ERR479171;ERR479170;ERR479169
ZellerG_2014	CCIS46047672ST-4-0	CRC	65	adult	male	FRA	IlluminaHiSeq	Gnome	25432777.0	NA	carcinoma	24.0	NA	no	42982745.0	3427270177.0	45.0	89.0	no	t4n0m1	NA	NA	ERR480670;ERR480669;ERR479174;ERR479173
ZellerG_2014	CCIS46467422ST-4-0	CRC	54	adult	female	FRA	IlluminaHiSeq	Gnome	25432777.0	NA	carcinoma	22.0	NA	no	12659025.0	1015859086.0	2.0	87.0	no	t3n1m0	NA	NA	ERR480672;ERR480671;ERR479176;ERR479175
ZellerG_2014	CCIS47284573ST-4-0	CRC	67	senior	male	FRA	IlluminaHiSeq	Gnome	25432777.0	NA	carcinoma	25.0	NA	no	39745148.0	3264825557.0	45.0	90.0	yes	t4n1m0	NA	NA	ERR480673;ERR480676;ERR480675;ERR480674;ERR479180;ERR479179;ERR479178;ERR479177
ZellerG_2014	CCIS48174381ST-4-0	control	66	senior	male	FRA	IlluminaHiSeq	Gnome	25432777.0	NA	NA	25.0	NA	no	51253211.0	4358945393.0	1.0	89.0	no	NA	NA	NA	ERR480682;ERR480681;ERR480680;ERR480679;ERR479184;ERR479186;ERR479185;ERR479183
ZellerG_2014	CCIS48725289ST-4-0	CRC	62	adult	female	FRA	IlluminaHiSeq	Gnome	25432777.0	NA	carcinoma	21.0	NA	no	35971780.0	2924500773.0	45.0	91.0	yes	t1n0m0	NA	NA	ERR480689;ERR480690;ERR479194;ERR479193
ZellerG_2014	CCIS50003399ST-4-0	control	66	senior	female	FRA	IlluminaHiSeq	Gnome	25432777.0	NA	NA	28.0	NA	no	63416533.0	5408998961.0	45.0	90.0	no	NA	NA	NA	ERR480692;ERR480691;ERR480694;ERR480693;ERR479198;ERR479196;ERR479195;ERR479197
ZellerG_2014	CCIS50148151ST-4-0	CRC	87	senior	female	FRA	IlluminaHiSeq	Gnome	25432777.0	NA	carcinoma	15.0	NA	no	54709150.0	4488120560.0	45.0	92.0	no	t2n1m0	NA	NA	ERR480696;ERR480695;ERR479199;ERR479200
ZellerG_2014	CCIS50471204ST-4-0	control	61	adult	female	FRA	IlluminaHiSeq	Gnome	25432777.0	NA	NA	23.0	NA	no	81465089.0	6959611519.0	45.0	90.0	no	NA	NA	NA	ERR480701;ERR480702;ERR480700;ERR480699;ERR479206;ERR479205;ERR479204;ERR479203
ZellerG_2014	CCIS51595129ST-4-0	control	63	adult	female	FRA	IlluminaHiSeq	Gnome	25432777.0	NA	NA	22.0	NA	no	59350393.0	5016717280.0	1.0	89.0	no	NA	NA	NA	ERR480705;ERR480708;ERR480707;ERR480706;ERR479212;ERR479211;ERR479210;ERR479209
ZellerG_2014	CCIS52370277ST-4-0	CRC	53	adult	male	FRA	IlluminaHiSeq	Gnome	25432777.0	NA	carcinoma	25.0	NA	no	56128839.0	4655519051.0	45.0	92.0	no	t4n1m1	NA	NA	ERR480717;ERR480718;ERR480716;ERR480715;ERR479222;ERR479221;ERR479220;ERR479219
ZellerG_2014	CCIS53043478ST-4-0	CRC	72	senior	male	FRA	IlluminaHiSeq	Gnome	25432777.0	NA	carcinoma	22.0	NA	no	41468101.0	3331840282.0	45.0	91.0	yes	t3n1m1	NA	NA	ERR480720;ERR480719;ERR479224;ERR479223
ZellerG_2014	CCIS53355328ST-4-0	CRC	76	senior	male	FRA	IlluminaHiSeq	Gnome	25432777.0	NA	carcinoma	NA	NA	no	40022941.0	3182274234.0	1.0	89.0	yes	t2n0m0	NA	NA	ERR480722;ERR480721;ERR479226;ERR479225
ZellerG_2014	CCIS55230578ST-4-0	CRC	64	adult	male	FRA	IlluminaHiSeq	Gnome	25432777.0	NA	carcinoma	30.0	NA	no	62688390.0	4925782891.0	45.0	89.0	no	t3n1m1	NA	NA	ERR480733;ERR480731;ERR480732;ERR479237;ERR479236;ERR479235
ZellerG_2014	CCIS58234805ST-4-0	CRC	70	senior	female	FRA	IlluminaHiSeq	Gnome	25432777.0	NA	carcinoma	26.0	NA	no	24459826.0	2054641330.0	45.0	90.0	yes	t3n1m0	NA	NA	ERR480740;ERR480739;ERR479244;ERR479243
ZellerG_2014	CCIS59132091ST-4-0	CRC	80	senior	female	FRA	IlluminaHiSeq	Gnome	25432777.0	NA	carcinoma	23.0	NA	no	103034276.0	8528422674.0	45.0	89.0	no	t1n0m0	NA	NA	ERR480744;ERR480741;ERR480743;ERR480742;ERR479247;ERR479246;ERR479245;ERR479248
ZellerG_2014	CCIS61287323ST-4-0	CRC	76	senior	male	FRA	IlluminaHiSeq	Gnome	25432777.0	NA	carcinoma	25.0	NA	no	79673095.0	6259486032.0	45.0	88.0	yes	t3n0m0	NA	NA	ERR480749;ERR480748;ERR480747;ERR479252;ERR479253;ERR479251
ZellerG_2014	CCIS62605362ST-3-0	CRC	56	adult	female	FRA	IlluminaHiSeq	Gnome	25432777.0	NA	carcinoma	23.0	NA	no	134059337.0	10842063366.0	45.0	86.0	yes	t3n0m0	NA	NA	ERR480750;ERR479254
ZellerG_2014	CCIS62794166ST-4-0	CRC	68	senior	male	FRA	IlluminaHiSeq	Gnome	25432777.0	NA	carcinoma	23.0	NA	no	39333809.0	3209540648.0	45.0	90.0	no	t3n1m1	NA	NA	ERR480754;ERR480752;ERR480751;ERR480753;ERR479258;ERR479257;ERR479255;ERR479256
ZellerG_2014	CCIS63448910ST-4-0	control	61	adult	female	FRA	IlluminaHiSeq	Gnome	25432777.0	NA	NA	34.0	NA	no	61901654.0	5241560072.0	1.0	89.0	no	NA	NA	NA	ERR480758;ERR480756;ERR480755;ERR480757;ERR479260;ERR479259;ERR479262;ERR479261
ZellerG_2014	CCIS63468405ST-4-0	control	69	senior	female	FRA	IlluminaHiSeq	Gnome	25432777.0	NA	NA	25.0	NA	no	67395395.0	5705040835.0	45.0	90.0	no	NA	NA	NA	ERR480760;ERR480762;ERR480761;ERR480759;ERR479266;ERR479265;ERR479264;ERR479263
ZellerG_2014	CCIS63910149ST-4-0	control	49	adult	female	FRA	IlluminaHiSeq	Gnome	25432777.0	NA	NA	23.0	NA	no	24843993.0	1992837785.0	45.0	88.0	no	NA	NA	NA	ERR480765;ERR480764;ERR480763;ERR479269;ERR479268;ERR479267
ZellerG_2014	CCIS64773582ST-4-0	control	63	adult	female	FRA	IlluminaHiSeq	Gnome	25432777.0	NA	NA	23.0	NA	no	91118209.0	7966706877.0	45.0	93.0	no	NA	NA	NA	ERR480769;ERR480766;ERR480768;ERR480767;ERR479273;ERR479272;ERR479271;ERR479270
ZellerG_2014	CCIS64785924ST-20-0	control	59	adult	female	FRA	IlluminaHiSeq	Gnome	25432777.0	NA	NA	25.0	NA	no	12636839.0	1128108433.0	45.0	95.0	no	NA	NA	NA	ERR480771;ERR480770;ERR479275;ERR479274
ZellerG_2014	CCIS65479369ST-4-0	CRC	69	senior	female	FRA	IlluminaHiSeq	Gnome	25432777.0	NA	carcinoma	25.0	NA	no	16650614.0	1369967696.0	45.0	91.0	yes	t3n1m1	NA	NA	ERR480774;ERR480773;ERR480772;ERR480775;ERR479277;ERR479276;ERR479279;ERR479278
ZellerG_2014	CCIS71301801ST-4-0	CRC	50	adult	female	FRA	IlluminaHiSeq	Gnome	25432777.0	NA	carcinoma	24.0	NA	no	95671668.0	8220141004.0	45.0	92.0	yes	t1n0m0	NA	NA	ERR480781;ERR480780;ERR479285;ERR479284
ZellerG_2014	CCIS71578391ST-4-0	control	70	senior	male	FRA	IlluminaHiSeq	Gnome	25432777.0	NA	NA	25.0	NA	no	74021867.0	6260894901.0	45.0	90.0	no	NA	NA	NA	ERR480784;ERR480783;ERR480785;ERR480782;ERR479289;ERR479288;ERR479287;ERR479286
ZellerG_2014	CCIS72607085ST-4-0	CRC	74	senior	female	FRA	IlluminaHiSeq	Gnome	25432777.0	NA	carcinoma	26.0	NA	no	46481994.0	3848726385.0	45.0	91.0	no	t3nxm1	NA	NA	ERR480789;ERR480788;ERR480787;ERR480786;ERR479290;ERR479293;ERR479292;ERR479291
ZellerG_2014	CCIS74239020ST-4-0	control	62	adult	male	FRA	IlluminaHiSeq	Gnome	25432777.0	NA	NA	24.0	NA	no	60489281.0	5138705109.0	45.0	90.0	no	NA	NA	NA	ERR480790;ERR480793;ERR480792;ERR480791;ERR479297;ERR479296;ERR479295;ERR479294
ZellerG_2014	CCIS76845094ST-20-0	CRC	44	adult	male	FRA	IlluminaHiSeq	Gnome	25432777.0	NA	carcinoma	20.0	NA	no	153432400.0	13684791942.0	45.0	95.0	yes	t3n1m1	NA	NA	ERR480798;ERR480799;ERR479303;ERR479302
ZellerG_2014	CCIS77252613ST-4-0	CRC	65	adult	male	FRA	IlluminaHiSeq	Gnome	25432777.0	NA	carcinoma	26.0	NA	no	89494083.0	7783680878.0	45.0	92.0	yes	t1n0m0	NA	NA	ERR480807;ERR480806;ERR480805;ERR480804;ERR479311;ERR479310;ERR479309;ERR479308
ZellerG_2014	CCIS78100604ST-4-0	control	64	adult	female	FRA	IlluminaHiSeq	Gnome	25432777.0	NA	NA	30.0	NA	no	78150540.0	6619013691.0	1.0	89.0	no	NA	NA	NA	ERR480811;ERR480810;ERR480809;ERR480808;ERR479313;ERR479312;ERR479314;ERR479315
ZellerG_2014	CCIS78318719ST-4-0	CRC	69	senior	female	FRA	IlluminaHiSeq	Gnome	25432777.0	NA	carcinoma	30.0	NA	no	59124409.0	4966168603.0	45.0	92.0	no	t3n0m0	NA	NA	ERR480813;ERR480814;ERR480812;ERR479318;ERR479317;ERR479316
ZellerG_2014	CCIS79210440ST-3-0	control	65	adult	male	FRA	IlluminaHiSeq	Gnome	25432777.0	NA	NA	30.0	NA	no	44022141.0	3056783044.0	45.0	68.0	yes	NA	NA	NA	ERR480816;ERR480815;ERR479319;ERR479320
ZellerG_2014	CCIS80834637ST-4-0	control	60	adult	female	FRA	IlluminaHiSeq	Gnome	25432777.0	NA	NA	28.0	NA	no	95462023.0	8078577899.0	45.0	90.0	no	NA	NA	NA	ERR480820;ERR480819;ERR480818;ERR480817;ERR479323;ERR479324;ERR479321;ERR479322
ZellerG_2014	CCIS81139242ST-4-0	control	64	adult	female	FRA	IlluminaHiSeq	Gnome	25432777.0	NA	NA	20.0	NA	no	66773170.0	5713080966.0	45.0	96.0	no	NA	NA	NA	ERR480822;ERR480821;ERR479326;ERR479325
ZellerG_2014	CCIS81887263ST-4-0	CRC	59	adult	male	FRA	IlluminaHiSeq	Gnome	25432777.0	NA	carcinoma	27.0	NA	no	89976522.0	7809347444.0	45.0	92.0	yes	t2n0m0	NA	NA	ERR480830;ERR480829;ERR480828;ERR480827;ERR479334;ERR479333;ERR479332;ERR479331
ZellerG_2014	CCIS82146115ST-4-0	CRC	51	adult	male	FRA	IlluminaHiSeq	Gnome	25432777.0	NA	carcinoma	24.0	NA	no	96243432.0	7855270798.0	1.0	89.0	no	t3n1m1	NA	NA	ERR480834;ERR480833;ERR480832;ERR480831;ERR479338;ERR479337;ERR479336;ERR479335
ZellerG_2014	CCIS82507866ST-3-0	control	57	adult	male	FRA	IlluminaHiSeq	Gnome	25432777.0	NA	NA	24.0	NA	no	45388199.0	3180717679.0	45.0	69.0	no	NA	NA	NA	ERR480836;ERR480835;ERR479339;ERR479340
ZellerG_2014	CCIS82944710ST-20-0	control	38	adult	female	FRA	IlluminaHiSeq	Gnome	25432777.0	NA	NA	22.0	NA	no	8890877.0	803852416.0	45.0	96.0	no	NA	NA	NA	ERR480838;ERR480837;ERR479342;ERR479341
ZellerG_2014	CCIS83870198ST-4-0	CRC	48	adult	female	FRA	IlluminaHiSeq	Gnome	25432777.0	NA	carcinoma	24.0	NA	no	75224196.0	6297114104.0	45.0	92.0	no	t1n0m0	NA	NA	ERR480846;ERR480845;ERR480844;ERR479349;ERR479348;ERR479350
ZellerG_2014	CCIS84543192ST-4-0	CRC	45	adult	female	FRA	IlluminaHiSeq	Gnome	25432777.0	NA	carcinoma	28.0	NA	no	35125765.0	2811757403.0	45.0	89.0	yes	t2n0m0	NA	NA	ERR480848;ERR480847;ERR479351;ERR479352
ZellerG_2014	CCIS85214191ST-3-0	CRC	63	adult	male	FRA	IlluminaHiSeq	Gnome	25432777.0	NA	carcinoma	22.0	NA	no	60695192.0	4841564987.0	45.0	88.0	yes	t3n1m1	NA	NA	ERR480850;ERR480849;ERR479354;ERR479353
ZellerG_2014	CCIS87116798ST-4-0	CRC	85	senior	female	FRA	IlluminaHiSeq	Gnome	25432777.0	NA	carcinoma	20.0	NA	no	50624818.0	4239137877.0	45.0	93.0	no	t3n1m1	NA	NA	ERR480852;ERR480851;ERR479356;ERR479355
ZellerG_2014	CCIS87167916ST-4-0	CRC	79	senior	male	FRA	IlluminaHiSeq	Gnome	25432777.0	NA	carcinoma	30.0	NA	no	50204707.0	3868143620.0	45.0	82.0	yes	t4n1m1	NA	NA	ERR480854;ERR480853;ERR479358;ERR479357
ZellerG_2014	CCIS87252800ST-4-0	CRC	73	senior	male	FRA	IlluminaHiSeq	Gnome	25432777.0	NA	carcinoma	17.0	NA	no	26015120.0	2216475835.0	45.0	93.0	no	t2n0m0	NA	NA	ERR480857;ERR480856;ERR480855;ERR479361;ERR479359;ERR479360
ZellerG_2014	CCIS87605453ST-4-0	CRC	73	senior	female	FRA	IlluminaHiSeq	Gnome	25432777.0	NA	carcinoma	26.0	NA	no	83221305.0	7016009997.0	1.0	89.0	yes	t3n0m0	NA	NA	ERR480865;ERR480864;ERR480863;ERR480862;ERR479369;ERR479368;ERR479367;ERR479366
ZellerG_2014	CCIS88007743ST-4-0	control	67	senior	female	FRA	IlluminaHiSeq	Gnome	25432777.0	NA	NA	23.0	NA	no	62698501.0	5261700925.0	1.0	89.0	no	NA	NA	NA	ERR480869;ERR480867;ERR480868;ERR480866;ERR479373;ERR479372;ERR479371;ERR479370
ZellerG_2014	CCIS88317640ST-4-0	control	74	senior	male	FRA	IlluminaHiSeq	Gnome	25432777.0	NA	NA	27.0	NA	no	72027798.0	6089304969.0	1.0	89.0	no	NA	NA	NA	ERR480870;ERR480873;ERR480872;ERR480871;ERR479376;ERR479375;ERR479374;ERR479377
ZellerG_2014	CCIS90164298ST-4-0	control	84	senior	male	FRA	IlluminaHiSeq	Gnome	25432777.0	NA	NA	23.0	NA	no	64903644.0	5520171452.0	45.0	90.0	no	NA	NA	NA	ERR480877;ERR480876;ERR480875;ERR480874;ERR479381;ERR479380;ERR479379;ERR479378
ZellerG_2014	CCIS91228662ST-4-0	CRC	63	adult	male	FRA	IlluminaHiSeq	Gnome	25432777.0	NA	carcinoma	31.0	NA	no	94076829.0	8027807010.0	45.0	92.0	no	t1n0m0	NA	NA	ERR480885;ERR480886;ERR479390;ERR479389
ZellerG_2014	CCIS93040568ST-20-0	control	65	adult	male	FRA	IlluminaHiSeq	Gnome	25432777.0	NA	NA	30.0	NA	no	13523536.0	1233826155.0	45.0	97.0	no	NA	NA	NA	ERR480888;ERR480887;ERR479392;ERR479391
ZellerG_2014	CCIS94417875ST-3-0	control	59	adult	female	FRA	IlluminaHiSeq	Gnome	25432777.0	NA	NA	25.0	NA	no	44052987.0	3132363570.0	45.0	70.0	no	NA	NA	NA	ERR480889;ERR480890;ERR479394;ERR479393
ZellerG_2014	CCIS94603952ST-4-0	control	80	senior	female	FRA	IlluminaHiSeq	Gnome	25432777.0	NA	NA	21.0	NA	no	69804753.0	5868133832.0	1.0	89.0	no	NA	NA	NA	ERR480895;ERR480894;ERR480893;ERR480896;ERR479400;ERR479399;ERR479398;ERR479397
ZellerG_2014	CCIS95097901ST-4-0	control	52	adult	male	FRA	IlluminaHiSeq	Gnome	25432777.0	NA	NA	24.0	NA	no	51567166.0	4271802257.0	45.0	91.0	no	NA	NA	NA	ERR480900;ERR480897;ERR480899;ERR480898;ERR479401;ERR479404;ERR479403;ERR479402
ZellerG_2014	CCIS95409808ST-4-0	control	63	adult	female	FRA	IlluminaHiSeq	Gnome	25432777.0	NA	NA	21.0	NA	no	66865743.0	5931273309.0	45.0	94.0	no	NA	NA	NA	ERR480904;ERR480903;ERR480902;ERR480901;ERR479408;ERR479405;ERR479407;ERR479406
ZellerG_2014	CCIS98482370ST-3-0	control	53	adult	female	FRA	IlluminaHiSeq	Gnome	25432777.0	NA	NA	30.0	NA	no	45190917.0	3154490787.0	45.0	69.0	no	NA	NA	NA	ERR480909;ERR480910;ERR479414;ERR479413
ZellerG_2014	CCIS98512455ST-4-0	CRC	63	adult	male	FRA	IlluminaHiSeq	Gnome	25432777.0	NA	carcinoma	29.0	NA	no	46052438.0	3914532361.0	45.0	96.0	no	t4n1m1	NA	NA	ERR480911;ERR480912;ERR479416;ERR479415
ZellerG_2014	CCIS98832363ST-4-0	CRC	55	adult	female	FRA	IlluminaHiSeq	Gnome	25432777.0	NA	carcinoma	25.0	NA	no	69793122.0	5748965241.0	45.0	93.0	yes	t3n1m0	NA	NA	ERR480914;ERR480913;ERR479418;ERR479417
YuJ_2015	SZAXPI003409-8	CRC	64	adult	male	CHN	IlluminaHiSeq	Qiagen	26408641.0	NA	carcinoma	23.1	NA	no	60749206.0	5782402056.0	30.0	100.0	NA	t3n1	NA	rectum	ERR1018185
YuJ_2015	SZAXPI003410-3	CRC	73	senior	male	CHN	IlluminaHiSeq	Qiagen	26408641.0	NA	carcinoma	23.8	NA	no	52854792.0	4958196559.0	30.0	100.0	NA	t2n0	NA	rectum	ERR1018186
YuJ_2015	SZAXPI003411-6	CRC	67	senior	female	CHN	IlluminaHiSeq	Qiagen	26408641.0	NA	carcinoma	24.7	NA	no	59873382.0	5674034861.0	30.0	100.0	NA	t3n1	NA	lc	ERR1018187
YuJ_2015	SZAXPI003412-1	CRC	56	adult	male	CHN	IlluminaHiSeq	Qiagen	26408641.0	NA	carcinoma	25.6	NA	no	55761702.0	5343486861.0	30.0	100.0	NA	t3n1	NA	rectum	ERR1018188
YuJ_2015	SZAXPI003413-4	CRC	59	adult	female	CHN	IlluminaHiSeq	Qiagen	26408641.0	NA	carcinoma	20.7	NA	no	64434830.0	6090719237.0	30.0	100.0	NA	multiple_liver_met	NA	lc	ERR1018189
YuJ_2015	SZAXPI003414-3	CRC	61	adult	male	CHN	IlluminaHiSeq	Qiagen	26408641.0	NA	carcinoma	25.2	NA	no	52102228.0	4952005733.0	30.0	100.0	NA	t3n1	NA	lc	ERR1018190
YuJ_2015	SZAXPI003415-12	CRC	60	adult	male	CHN	IlluminaHiSeq	Qiagen	26408641.0	NA	carcinoma	23.2	NA	no	62456910.0	5958738352.0	30.0	100.0	NA	t3n2	NA	rectum	ERR1018191
YuJ_2015	SZAXPI003416-4	CRC	73	senior	female	CHN	IlluminaHiSeq	Qiagen	26408641.0	NA	carcinoma	17.7	NA	no	60073374.0	5634395962.0	30.0	100.0	NA	t2n0	NA	rectum	ERR1018192
YuJ_2015	SZAXPI003417-4	control	62	adult	male	CHN	IlluminaHiSeq	Qiagen	26408641.0	NA	NA	21.7	NA	no	61229038.0	5802081901.0	30.0	100.0	NA	NA	NA	NA	ERR1018193
YuJ_2015	SZAXPI003418-8	CRC	72	senior	female	CHN	IlluminaHiSeq	Qiagen	26408641.0	NA	carcinoma	26.3	NA	no	61472286.0	5848388244.0	30.0	100.0	NA	t3n0	NA	rc	ERR1018194
YuJ_2015	SZAXPI003419-6	control	65	adult	male	CHN	IlluminaHiSeq	Qiagen	26408641.0	NA	NA	20.7	NA	no	64164216.0	6128118370.0	30.0	100.0	NA	NA	NA	NA	ERR1018195
YuJ_2015	SZAXPI003420-4	CRC	65	adult	male	CHN	IlluminaHiSeq	Qiagen	26408641.0	NA	carcinoma	24.8	NA	no	66150638.0	6312390149.0	30.0	100.0	NA	t1n0	NA	lc	ERR1018196
YuJ_2015	SZAXPI003421-5	CRC	71	senior	male	CHN	IlluminaHiSeq	Qiagen	26408641.0	NA	carcinoma	25.8	NA	no	60074902.0	5750793357.0	30.0	100.0	NA	t2n0	NA	rectum	ERR1018197
YuJ_2015	SZAXPI003422-11	CRC	50	adult	male	CHN	IlluminaHiSeq	Qiagen	26408641.0	NA	carcinoma	25.2	NA	no	57351612.0	5366059753.0	30.0	100.0	NA	t1n0	NA	rectum	ERR1018198
YuJ_2015	SZAXPI003423-8	CRC	55	adult	male	CHN	IlluminaHiSeq	Qiagen	26408641.0	NA	carcinoma	22.2	NA	no	29589862.0	2820598675.0	30.0	100.0	NA	t3n1m1	NA	rectum	ERR1018199
YuJ_2015	SZAXPI003424-12	CRC	77	senior	male	CHN	IlluminaHiSeq	Qiagen	26408641.0	NA	carcinoma	21.7	NA	no	58546892.0	5593003062.0	30.0	100.0	NA	t3n1	NA	lc	ERR1018200
YuJ_2015	SZAXPI003425-1	CRC	45	adult	female	CHN	IlluminaHiSeq	Qiagen	26408641.0	NA	carcinoma	23.0	NA	no	56584998.0	5352993848.0	30.0	100.0	NA	t1n0	NA	lc	ERR1018201
YuJ_2015	SZAXPI003426-11	CRC	89	senior	female	CHN	IlluminaHiSeq	Qiagen	26408641.0	NA	carcinoma	23.7	NA	no	51292156.0	4898058708.0	30.0	100.0	NA	t3n0	NA	rc	ERR1018202
YuJ_2015	SZAXPI003427-1	CRC	58	adult	female	CHN	IlluminaHiSeq	Qiagen	26408641.0	NA	carcinoma	21.6	NA	no	54116632.0	5167203436.0	30.0	100.0	NA	NA	NA	NA	ERR1018203
YuJ_2015	SZAXPI003428-6	CRC	58	adult	female	CHN	IlluminaHiSeq	Qiagen	26408641.0	NA	carcinoma	23.9	NA	no	56648482.0	5260734071.0	30.0	100.0	NA	t2n1	NA	rectum	ERR1018204
YuJ_2015	SZAXPI003429-3	control	68	senior	male	CHN	IlluminaHiSeq	Qiagen	26408641.0	NA	NA	21.7	NA	no	57035188.0	5434611996.0	30.0	100.0	NA	NA	NA	NA	ERR1018205
YuJ_2015	SZAXPI003430-5	CRC	64	adult	female	CHN	IlluminaHiSeq	Qiagen	26408641.0	NA	carcinoma	29.1	NA	no	62258080.0	5963691551.0	30.0	100.0	NA	t3n1	NA	lc	ERR1018206
YuJ_2015	SZAXPI003431-1	CRC	75	senior	female	CHN	IlluminaHiSeq	Qiagen	26408641.0	NA	carcinoma	28.7	NA	no	45637278.0	4319033464.0	30.0	100.0	NA	t3n0	NA	lc	ERR1018207
YuJ_2015	SZAXPI003432-12	CRC	73	senior	male	CHN	IlluminaHiSeq	Qiagen	26408641.0	NA	carcinoma	22.7	NA	no	58822118.0	5458804627.0	30.0	100.0	NA	t3n0	NA	rc	ERR1018208
YuJ_2015	SZAXPI003433-7	control	62	adult	female	CHN	IlluminaHiSeq	Qiagen	26408641.0	NA	NA	21.4	NA	no	56134340.0	5409995654.0	30.0	100.0	NA	NA	NA	NA	ERR1018209
YuJ_2015	SZAXPI003434-7	CRC	80	senior	male	CHN	IlluminaHiSeq	Qiagen	26408641.0	NA	carcinoma	24.0	NA	no	60820472.0	5746098424.0	30.0	100.0	NA	t1n0	NA	rectum	ERR1018210
YuJ_2015	SZAXPI003435-11	CRC	67	senior	male	CHN	IlluminaHiSeq	Qiagen	26408641.0	NA	carcinoma	23.1	NA	no	61937738.0	5870370380.0	30.0	100.0	NA	t3n0	NA	lc	ERR1018211
YuJ_2015	SZAXPI003436-7	CRC	61	adult	female	CHN	IlluminaHiSeq	Qiagen	26408641.0	NA	carcinoma	22.0	NA	no	59665954.0	5620259779.0	30.0	100.0	NA	t1n0	NA	rectum	ERR1018212
YuJ_2015	SZAXPI003437-3	CRC	63	adult	male	CHN	IlluminaHiSeq	Qiagen	26408641.0	NA	carcinoma	24.4	NA	no	57476278.0	5477743161.0	30.0	100.0	NA	t1n0	NA	rectum	ERR1018213
YuJ_2015	SZAXPI015209-133	CRC	51	adult	female	CHN	IlluminaHiSeq	Qiagen	26408641.0	NA	carcinoma	19.6	NA	no	62349482.0	5867266433.0	30.0	100.0	NA	t1n0	NA	lc	ERR1018214
YuJ_2015	SZAXPI015210-17	CRC	64	adult	male	CHN	IlluminaHiSeq	Qiagen	26408641.0	NA	carcinoma	NA	NA	no	71617186.0	6779395176.0	30.0	100.0	NA	t1n0	NA	NA	ERR1018215
YuJ_2015	SZAXPI015211-166	CRC	74	senior	female	CHN	IlluminaHiSeq	Qiagen	26408641.0	NA	carcinoma	28.7	NA	no	47029284.0	4324269958.0	30.0	100.0	NA	t4n2	NA	rectum	ERR1018216
YuJ_2015	SZAXPI015212-113	control	68	senior	male	CHN	IlluminaHiSeq	Qiagen	26408641.0	NA	NA	20.4	NA	no	63330138.0	5953975242.0	30.0	100.0	NA	NA	NA	NA	ERR1018217
YuJ_2015	SZAXPI015213-15	CRC	83	senior	female	CHN	IlluminaHiSeq	Qiagen	26408641.0	NA	carcinoma	30.4	NA	no	62319068.0	6116520802.0	30.0	100.0	NA	t3n1	NA	rc	ERR1018218
YuJ_2015	SZAXPI015214-19	CRC	70	senior	male	CHN	IlluminaHiSeq	Qiagen	26408641.0	NA	carcinoma	24.6	NA	no	72370444.0	7071081405.0	30.0	100.0	NA	t1n0	NA	NA	ERR1018219
YuJ_2015	SZAXPI015215-20	CRC	56	adult	male	CHN	IlluminaHiSeq	Qiagen	26408641.0	NA	carcinoma	25.9	NA	no	68159682.0	6648869146.0	30.0	100.0	NA	t1n0	NA	NA	ERR1018220
YuJ_2015	SZAXPI015216-169	CRC	54	adult	male	CHN	IlluminaHiSeq	Qiagen	26408641.0	NA	carcinoma	17.9	NA	no	61187040.0	5583533631.0	30.0	100.0	NA	t3n0	NA	rectum	ERR1018221
YuJ_2015	SZAXPI015217-140	CRC	74	senior	male	CHN	IlluminaHiSeq	Qiagen	26408641.0	NA	carcinoma	26.8	NA	no	57034986.0	5490157283.0	30.0	100.0	NA	t4n2	NA	lc	ERR1018222
YuJ_2015	SZAXPI015218-16	CRC	57	adult	male	CHN	IlluminaHiSeq	Qiagen	26408641.0	NA	carcinoma	23.2	NA	no	61334626.0	6005812224.0	30.0	100.0	NA	t3n0	NA	lc	ERR1018223
YuJ_2015	SZAXPI015219-129	CRC	54	adult	female	CHN	IlluminaHiSeq	Qiagen	26408641.0	NA	carcinoma	29.7	NA	no	50308904.0	4798011366.0	30.0	100.0	NA	t3n0	NA	lc	ERR1018224
YuJ_2015	SZAXPI015220-136	CRC	62	adult	male	CHN	IlluminaHiSeq	Qiagen	26408641.0	NA	carcinoma	22.7	NA	no	43205192.0	4215741721.0	30.0	100.0	NA	t3n1	NA	rectum	ERR1018225
YuJ_2015	SZAXPI015221-142	CRC	54	adult	female	CHN	IlluminaHiSeq	Qiagen	26408641.0	NA	carcinoma	25.6	NA	no	68438974.0	6659496745.0	30.0	100.0	NA	t4n1m1	NA	lc	ERR1018226
YuJ_2015	SZAXPI015222-123	CRC	69	senior	male	CHN	IlluminaHiSeq	Qiagen	26408641.0	NA	carcinoma	29.0	NA	no	72260226.0	7063847425.0	30.0	100.0	NA	t2n0	NA	rectum	ERR1018227
YuJ_2015	SZAXPI015223-158	CRC	64	adult	male	CHN	IlluminaHiSeq	Qiagen	26408641.0	NA	carcinoma	24.8	NA	no	62569760.0	6074413096.0	30.0	100.0	NA	t3n0	NA	rectum	ERR1018228
YuJ_2015	SZAXPI015224-13	CRC	44	adult	male	CHN	IlluminaHiSeq	Qiagen	26408641.0	NA	carcinoma	22.5	NA	no	58539128.0	5388058294.0	30.0	100.0	NA	t2n0	NA	lc	ERR1018229
YuJ_2015	SZAXPI015225-18	CRC	60	adult	male	CHN	IlluminaHiSeq	Qiagen	26408641.0	NA	carcinoma	17.3	NA	no	59984388.0	5805169579.0	30.0	100.0	NA	t3n3m1	NA	lc	ERR1018230
YuJ_2015	SZAXPI015226-14	CRC	73	senior	male	CHN	IlluminaHiSeq	Qiagen	26408641.0	NA	carcinoma	24.5	NA	no	53627618.0	5270117008.0	30.0	100.0	NA	t4n0	NA	lc	ERR1018231
YuJ_2015	SZAXPI015227-13	control	62	adult	female	CHN	IlluminaHiSeq	Qiagen	26408641.0	NA	NA	32.5	NA	no	66064102.0	6435852633.0	30.0	100.0	NA	NA	NA	NA	ERR1018232
YuJ_2015	SZAXPI015228-14	control	58	adult	male	CHN	IlluminaHiSeq	Qiagen	26408641.0	NA	NA	22.3	NA	no	70428992.0	6895320232.0	30.0	100.0	NA	NA	NA	NA	ERR1018233
YuJ_2015	SZAXPI015229-15	control	64	adult	male	CHN	IlluminaHiSeq	Qiagen	26408641.0	NA	NA	24.8	NA	no	61617318.0	5938321460.0	30.0	100.0	NA	NA	NA	NA	ERR1018234
YuJ_2015	SZAXPI015230-16	control	65	adult	female	CHN	IlluminaHiSeq	Qiagen	26408641.0	NA	NA	35.1	NA	no	68472136.0	6673610903.0	30.0	100.0	NA	NA	NA	NA	ERR1018235
YuJ_2015	SZAXPI015231-17	control	62	adult	male	CHN	IlluminaHiSeq	Qiagen	26408641.0	NA	NA	23.5	NA	no	69534266.0	6814348601.0	30.0	100.0	NA	NA	NA	NA	ERR1018236
YuJ_2015	SZAXPI015232-18	control	69	senior	female	CHN	IlluminaHiSeq	Qiagen	26408641.0	NA	NA	24.9	NA	no	68004090.0	6660180016.0	30.0	100.0	NA	NA	NA	NA	ERR1018237
YuJ_2015	SZAXPI015233-19	control	55	adult	male	CHN	IlluminaHiSeq	Qiagen	26408641.0	NA	NA	26.4	NA	no	72077438.0	7024760687.0	30.0	100.0	NA	NA	NA	NA	ERR1018238
YuJ_2015	SZAXPI015234-20	control	64	adult	female	CHN	IlluminaHiSeq	Qiagen	26408641.0	NA	NA	26.4	NA	no	59159772.0	5749744210.0	30.0	100.0	NA	NA	NA	NA	ERR1018239
YuJ_2015	SZAXPI015235-21	control	59	adult	male	CHN	IlluminaHiSeq	Qiagen	26408641.0	NA	NA	25.6	NA	no	67478554.0	6628831167.0	30.0	100.0	NA	NA	NA	NA	ERR1018240
YuJ_2015	SZAXPI015237-23	CRC	70	senior	male	CHN	IlluminaHiSeq	Qiagen	26408641.0	NA	carcinoma	21.0	NA	no	67318902.0	6575946140.0	30.0	100.0	NA	t3n1	NA	rc	ERR1018241
YuJ_2015	SZAXPI015238-24	control	71	senior	female	CHN	IlluminaHiSeq	Qiagen	26408641.0	NA	NA	26.7	NA	no	63843786.0	5974605135.0	30.0	100.0	NA	NA	NA	NA	ERR1018242
YuJ_2015	SZAXPI015239-25	control	51	adult	male	CHN	IlluminaHiSeq	Qiagen	26408641.0	NA	NA	21.9	NA	no	63808150.0	6256894354.0	30.0	100.0	NA	NA	NA	NA	ERR1018243
YuJ_2015	SZAXPI015240-26	control	50	adult	male	CHN	IlluminaHiSeq	Qiagen	26408641.0	NA	NA	20.5	NA	no	60520634.0	5934000840.0	30.0	100.0	NA	NA	NA	NA	ERR1018244
YuJ_2015	SZAXPI015241-27	control	64	adult	male	CHN	IlluminaHiSeq	Qiagen	26408641.0	NA	NA	24.7	NA	no	52698148.0	4931948740.0	30.0	100.0	NA	NA	NA	NA	ERR1018245
YuJ_2015	SZAXPI015242-30	control	50	adult	male	CHN	IlluminaHiSeq	Qiagen	26408641.0	NA	NA	23.3	NA	no	52788942.0	5154274247.0	30.0	100.0	NA	NA	NA	NA	ERR1018246
YuJ_2015	SZAXPI015243-31	control	66	senior	female	CHN	IlluminaHiSeq	Qiagen	26408641.0	NA	NA	22.4	NA	no	57114396.0	5567635662.0	30.0	100.0	NA	NA	NA	NA	ERR1018247
YuJ_2015	SZAXPI015244-32	control	52	adult	male	CHN	IlluminaHiSeq	Qiagen	26408641.0	NA	NA	28.4	NA	no	58591508.0	5725708568.0	30.0	100.0	NA	NA	NA	NA	ERR1018248
YuJ_2015	SZAXPI015245-33	control	64	adult	male	CHN	IlluminaHiSeq	Qiagen	26408641.0	NA	NA	25.6	NA	no	49693868.0	4743989231.0	30.0	100.0	NA	NA	NA	NA	ERR1018249
YuJ_2015	SZAXPI015246-34	control	58	adult	male	CHN	IlluminaHiSeq	Qiagen	26408641.0	NA	NA	23.1	NA	no	47524484.0	4605248434.0	30.0	100.0	NA	NA	NA	NA	ERR1018250
YuJ_2015	SZAXPI015247-35	control	64	adult	female	CHN	IlluminaHiSeq	Qiagen	26408641.0	NA	NA	17.1	NA	no	55499678.0	5228553296.0	30.0	100.0	NA	NA	NA	NA	ERR1018251
YuJ_2015	SZAXPI015248-36	control	65	adult	male	CHN	IlluminaHiSeq	Qiagen	26408641.0	NA	NA	22.4	NA	no	46313860.0	4284823360.0	30.0	100.0	NA	NA	NA	NA	ERR1018252
YuJ_2015	SZAXPI015249-37	control	53	adult	male	CHN	IlluminaHiSeq	Qiagen	26408641.0	NA	NA	19.7	NA	no	48490500.0	4421327366.0	30.0	100.0	NA	NA	NA	NA	ERR1018253
YuJ_2015	SZAXPI015250-39	control	64	adult	female	CHN	IlluminaHiSeq	Qiagen	26408641.0	NA	NA	21.1	NA	no	56707948.0	5532795294.0	30.0	100.0	NA	NA	NA	NA	ERR1018254
YuJ_2015	SZAXPI015251-41	control	68	senior	female	CHN	IlluminaHiSeq	Qiagen	26408641.0	NA	NA	24.9	NA	no	44019090.0	4087572754.0	30.0	100.0	NA	NA	NA	NA	ERR1018255
YuJ_2015	SZAXPI015252-43	control	53	adult	male	CHN	IlluminaHiSeq	Qiagen	26408641.0	NA	NA	23.4	NA	no	44904362.0	4378527165.0	30.0	100.0	NA	NA	NA	NA	ERR1018256
YuJ_2015	SZAXPI015253-44	control	64	adult	female	CHN	IlluminaHiSeq	Qiagen	26408641.0	NA	NA	22.7	NA	no	61595372.0	6031404940.0	30.0	100.0	NA	NA	NA	NA	ERR1018257
YuJ_2015	SZAXPI015254-45	control	61	adult	male	CHN	IlluminaHiSeq	Qiagen	26408641.0	NA	NA	21.5	NA	no	57962360.0	5452370978.0	30.0	100.0	NA	NA	NA	NA	ERR1018258
YuJ_2015	SZAXPI015255-46	control	62	adult	female	CHN	IlluminaHiSeq	Qiagen	26408641.0	NA	NA	21.1	NA	no	56561906.0	5286392158.0	30.0	100.0	NA	NA	NA	NA	ERR1018259
YuJ_2015	SZAXPI015256-47	control	64	adult	male	CHN	IlluminaHiSeq	Qiagen	26408641.0	NA	NA	24.1	NA	no	61955812.0	5913649423.0	30.0	100.0	NA	NA	NA	NA	ERR1018260
YuJ_2015	SZAXPI015257-56	control	55	adult	male	CHN	IlluminaHiSeq	Qiagen	26408641.0	NA	NA	22.3	NA	no	54321366.0	5122974616.0	30.0	100.0	NA	NA	NA	NA	ERR1018261
YuJ_2015	SZAXPI015258-57	control	64	adult	female	CHN	IlluminaHiSeq	Qiagen	26408641.0	NA	NA	22.6	NA	no	77263508.0	7565053111.0	30.0	100.0	NA	NA	NA	NA	ERR1018262
YuJ_2015	SZAXPI015259-62	control	71	senior	female	CHN	IlluminaHiSeq	Qiagen	26408641.0	NA	NA	23.0	NA	no	55579348.0	5461060156.0	30.0	100.0	NA	NA	NA	NA	ERR1018263
YuJ_2015	SZAXPI015260-74	control	64	adult	female	CHN	IlluminaHiSeq	Qiagen	26408641.0	NA	NA	22.2	NA	no	59038886.0	5409790102.0	30.0	100.0	NA	NA	NA	NA	ERR1018264
YuJ_2015	SZAXPI015261-75	control	65	adult	male	CHN	IlluminaHiSeq	Qiagen	26408641.0	NA	NA	22.5	NA	no	62784088.0	6142339703.0	30.0	100.0	NA	NA	NA	NA	ERR1018265
YuJ_2015	SZAXPI015262-79	control	73	senior	female	CHN	IlluminaHiSeq	Qiagen	26408641.0	NA	NA	24.1	NA	no	61975626.0	6072275849.0	30.0	100.0	NA	NA	NA	NA	ERR1018266
YuJ_2015	SZAXPI015263-84	control	54	adult	male	CHN	IlluminaHiSeq	Qiagen	26408641.0	NA	NA	27.7	NA	no	51471774.0	4783479071.0	30.0	100.0	NA	NA	NA	NA	ERR1018267
YuJ_2015	SZAXPI015264-87	control	65	adult	female	CHN	IlluminaHiSeq	Qiagen	26408641.0	NA	NA	21.2	NA	no	58364678.0	5705212005.0	30.0	100.0	NA	NA	NA	NA	ERR1018268
YuJ_2015	SZAXPI015265-88	control	60	adult	male	CHN	IlluminaHiSeq	Qiagen	26408641.0	NA	NA	22.5	NA	no	60676490.0	5953705467.0	30.0	100.0	NA	NA	NA	NA	ERR1018269
YuJ_2015	SZAXPI015266-89	control	58	adult	male	CHN	IlluminaHiSeq	Qiagen	26408641.0	NA	NA	26.3	NA	no	63341086.0	6214859452.0	30.0	100.0	NA	NA	NA	NA	ERR1018270
YuJ_2015	SZAXPI015267-102	control	64	adult	female	CHN	IlluminaHiSeq	Qiagen	26408641.0	NA	NA	21.3	NA	no	55190022.0	5067016252.0	30.0	100.0	NA	NA	NA	NA	ERR1018271
YuJ_2015	SZAXPI015268-109	control	69	senior	male	CHN	IlluminaHiSeq	Qiagen	26408641.0	NA	NA	23.8	NA	no	60252226.0	5847463811.0	30.0	100.0	NA	NA	NA	NA	ERR1018272
YuJ_2015	SZAXPI015269-94	control	65	adult	female	CHN	IlluminaHiSeq	Qiagen	26408641.0	NA	NA	20.0	NA	no	62929376.0	5841330956.0	30.0	100.0	NA	NA	NA	NA	ERR1018273
YuJ_2015	SZAXPI015270-90	control	59	adult	male	CHN	IlluminaHiSeq	Qiagen	26408641.0	NA	NA	23.7	NA	no	63280364.0	5963817711.0	30.0	100.0	NA	NA	NA	NA	ERR1018274
YuJ_2015	SZAXPI015271-93	control	70	senior	female	CHN	IlluminaHiSeq	Qiagen	26408641.0	NA	NA	22.2	NA	no	43217884.0	4208577504.0	30.0	100.0	NA	NA	NA	NA	ERR1018275
YuJ_2015	SZAXPI015272-108	control	61	adult	male	CHN	IlluminaHiSeq	Qiagen	26408641.0	NA	NA	23.7	NA	no	44188276.0	4325874871.0	30.0	100.0	NA	NA	NA	NA	ERR1018276
YuJ_2015	SZAXPI015273-95	control	52	adult	male	CHN	IlluminaHiSeq	Qiagen	26408641.0	NA	NA	24.6	NA	no	60671012.0	5963396124.0	30.0	100.0	NA	NA	NA	NA	ERR1018277
YuJ_2015	SZAXPI015274-111	control	58	adult	male	CHN	IlluminaHiSeq	Qiagen	26408641.0	NA	NA	24.5	NA	no	63322690.0	5988073670.0	30.0	100.0	NA	NA	NA	NA	ERR1018278
YuJ_2015	SZAXPI017451-16	CRC	60	adult	male	CHN	IlluminaHiSeq	Qiagen	26408641.0	NA	carcinoma	20.0	NA	no	63781394.0	6159612826.0	30.0	100.0	NA	t1n0	NA	NA	ERR1018279
YuJ_2015	SZAXPI017452-17	CRC	77	senior	male	CHN	IlluminaHiSeq	Qiagen	26408641.0	NA	carcinoma	24.5	NA	no	65133586.0	6291809354.0	30.0	100.0	NA	t3n0	NA	NA	ERR1018280
YuJ_2015	SZAXPI017453-19	CRC	59	adult	female	CHN	IlluminaHiSeq	Qiagen	26408641.0	NA	carcinoma	27.0	NA	no	52187750.0	4805566759.0	30.0	100.0	NA	t3n0	NA	NA	ERR1018281
YuJ_2015	SZAXPI017454-20	CRC	71	senior	female	CHN	IlluminaHiSeq	Qiagen	26408641.0	NA	carcinoma	21.2	NA	no	56903946.0	5300707451.0	30.0	100.0	NA	t3n1	NA	NA	ERR1018282
YuJ_2015	SZAXPI017455-21	CRC	56	adult	male	CHN	IlluminaHiSeq	Qiagen	26408641.0	NA	carcinoma	31.3	NA	no	51245744.0	4788302397.0	30.0	100.0	NA	t3n1	NA	rc	ERR1018283
YuJ_2015	SZAXPI017456-23	CRC	77	senior	male	CHN	IlluminaHiSeq	Qiagen	26408641.0	NA	carcinoma	22.0	NA	no	51812238.0	4853435538.0	30.0	100.0	NA	t3n0	NA	lc	ERR1018284
YuJ_2015	SZAXPI017457-24	CRC	77	senior	male	CHN	IlluminaHiSeq	Qiagen	26408641.0	NA	carcinoma	23.5	NA	no	62149784.0	5802726469.0	30.0	100.0	NA	t3n0	NA	lc	ERR1018285
YuJ_2015	SZAXPI017458-25	CRC	83	senior	female	CHN	IlluminaHiSeq	Qiagen	26408641.0	NA	carcinoma	22.8	NA	no	55720964.0	5228621466.0	30.0	100.0	NA	t3n0	NA	lc	ERR1018286
YuJ_2015	SZAXPI017459-26	CRC	79	senior	female	CHN	IlluminaHiSeq	Qiagen	26408641.0	NA	carcinoma	25.8	NA	no	36891208.0	3565318892.0	30.0	100.0	NA	m	NA	NA	ERR1018287
YuJ_2015	SZAXPI017460-27	CRC	69	senior	female	CHN	IlluminaHiSeq	Qiagen	26408641.0	NA	carcinoma	28.3	NA	no	38931972.0	3719245972.0	30.0	100.0	NA	m1	NA	lc	ERR1018288
YuJ_2015	SZAXPI017461-32	CRC	62	adult	male	CHN	IlluminaHiSeq	Qiagen	26408641.0	NA	carcinoma	23.5	NA	no	35025672.0	3387430279.0	30.0	100.0	NA	t1n0	NA	NA	ERR1018289
YuJ_2015	SZAXPI017462-33	CRC	78	senior	male	CHN	IlluminaHiSeq	Qiagen	26408641.0	NA	carcinoma	27.0	NA	no	38286210.0	3694689270.0	30.0	100.0	NA	t3n2	NA	rectum	ERR1018290
YuJ_2015	SZAXPI017463-36	CRC	49	adult	female	CHN	IlluminaHiSeq	Qiagen	26408641.0	NA	carcinoma	22.6	NA	no	38421068.0	3696564849.0	30.0	100.0	NA	t3n+	NA	rectum	ERR1018291
YuJ_2015	SZAXPI017464-37	CRC	81	senior	male	CHN	IlluminaHiSeq	Qiagen	26408641.0	NA	carcinoma	18.2	NA	no	36345768.0	3525605588.0	30.0	100.0	NA	t3n+	NA	rectum	ERR1018292
YuJ_2015	SZAXPI017465-43	CRC	63	adult	female	CHN	IlluminaHiSeq	Qiagen	26408641.0	NA	carcinoma	28.0	NA	no	37024436.0	3514766749.0	30.0	100.0	NA	t3n1	NA	rectum	ERR1018293
YuJ_2015	SZAXPI017466-84	CRC	59	adult	male	CHN	IlluminaHiSeq	Qiagen	26408641.0	NA	carcinoma	24.5	NA	no	40407172.0	3836371213.0	30.0	100.0	NA	t3n0	NA	lc	ERR1018294
YuJ_2015	SZAXPI017467-87	CRC	73	senior	male	CHN	IlluminaHiSeq	Qiagen	26408641.0	NA	carcinoma	22.1	NA	no	42423706.0	4080498548.0	30.0	100.0	NA	t3n0	NA	rc	ERR1018295
YuJ_2015	SZAXPI017468-88	CRC	76	senior	male	CHN	IlluminaHiSeq	Qiagen	26408641.0	NA	carcinoma	21.9	NA	no	10961564.0	1077534564.0	30.0	100.0	NA	t3n1	NA	rectum	ERR1018296
YuJ_2015	SZAXPI017580-90	CRC	74	senior	female	CHN	IlluminaHiSeq	Qiagen	26408641.0	NA	carcinoma	17.9	NA	no	48287820.0	4645971246.0	30.0	100.0	NA	t3n2	NA	rectum	ERR1018297
YuJ_2015	SZAXPI017581-93	CRC	51	adult	male	CHN	IlluminaHiSeq	Qiagen	26408641.0	NA	carcinoma	26.9	NA	no	37627614.0	3592068766.0	30.0	100.0	NA	t3n0	NA	rectum	ERR1018298
YuJ_2015	SZAXPI017582-94	CRC	74	senior	male	CHN	IlluminaHiSeq	Qiagen	26408641.0	NA	carcinoma	24.2	NA	no	50539146.0	4977096921.0	30.0	100.0	NA	t2n1	NA	rc	ERR1018299
YuJ_2015	SZAXPI017583-102	CRC	77	senior	male	CHN	IlluminaHiSeq	Qiagen	26408641.0	NA	carcinoma	20.2	NA	no	40240288.0	3861481843.0	30.0	100.0	NA	t3n0	NA	rectum	ERR1018300
YuJ_2015	SZAXPI017584-108	CRC	34	adult	male	CHN	IlluminaHiSeq	Qiagen	26408641.0	NA	carcinoma	19.4	NA	no	44341480.0	4339363261.0	30.0	100.0	NA	t3n0	NA	rc	ERR1018301
YuJ_2015	SZAXPI017585-109	CRC	70	senior	female	CHN	IlluminaHiSeq	Qiagen	26408641.0	NA	carcinoma	26.7	NA	no	65450728.0	6454082758.0	30.0	100.0	NA	t2n0	NA	rectum	ERR1018302
YuJ_2015	SZAXPI017586-111	CRC	83	senior	female	CHN	IlluminaHiSeq	Qiagen	26408641.0	NA	carcinoma	18.9	NA	no	57315876.0	5593184628.0	30.0	100.0	NA	t3n2	NA	rectum	ERR1018303
YuJ_2015	SZAXPI017587-113	CRC	68	senior	male	CHN	IlluminaHiSeq	Qiagen	26408641.0	NA	carcinoma	21.5	NA	no	59042440.0	5796676630.0	30.0	100.0	NA	t3n0	NA	lc	ERR1018304
YuJ_2015	SZAXPI017588-123	CRC	79	senior	male	CHN	IlluminaHiSeq	Qiagen	26408641.0	NA	carcinoma	26.8	NA	no	58518194.0	5738342166.0	30.0	100.0	NA	t3n0	NA	rc	ERR1018305
YuJ_2015	SZAXPI017589-133	CRC	64	adult	female	CHN	IlluminaHiSeq	Qiagen	26408641.0	NA	carcinoma	28.3	NA	no	49356502.0	4855210014.0	30.0	100.0	NA	t4n2m1	NA	rc	ERR1018306
YuJ_2015	SZAXPI017590-136	CRC	67	senior	male	CHN	IlluminaHiSeq	Qiagen	26408641.0	NA	carcinoma	24.9	NA	no	51070446.0	4993945911.0	30.0	100.0	NA	t2n1	NA	rectum	ERR1018307
YuJ_2015	SZAXPI017591-140	control	61	adult	male	CHN	IlluminaHiSeq	Qiagen	26408641.0	NA	NA	23.8	NA	no	58080274.0	5690446732.0	30.0	100.0	NA	NA	NA	NA	ERR1018308
YuJ_2015	SZAXPI017592-142	control	62	adult	male	CHN	IlluminaHiSeq	Qiagen	26408641.0	NA	NA	21.5	NA	no	57219434.0	5584524714.0	30.0	100.0	NA	NA	NA	NA	ERR1018309
YuJ_2015	SZAXPI017593-158	CRC	68	senior	male	CHN	IlluminaHiSeq	Qiagen	26408641.0	NA	carcinoma	23.7	NA	no	66186116.0	6469426091.0	30.0	100.0	NA	t3n2	NA	lc	ERR1018310
YuJ_2015	SZAXPI017594-166	CRC	55	adult	male	CHN	IlluminaHiSeq	Qiagen	26408641.0	NA	carcinoma	25.8	NA	no	58789886.0	5787105961.0	30.0	100.0	NA	t3n1	NA	lc	ERR1018311
YuJ_2015	SZAXPI017595-169	CRC	63	adult	male	CHN	IlluminaHiSeq	Qiagen	26408641.0	NA	carcinoma	22.5	NA	no	63339956.0	6222135039.0	30.0	100.0	NA	t3n1m1	NA	lc	ERR1018312
FengQ_2015	SID31766	control	73	senior	female	AUT	IlluminaHiSeq	MoBio	25758642.0	unknown	na	32.0	NA	no	39421207.0	3749643349.0	30.0	97.0	NA	unknown	NA	NA	ERR688566;ERR688419
FengQ_2015	SID31537	control	70	senior	female	AUT	IlluminaHiSeq	MoBio	25758642.0	unknown	na	31.0	NA	no	50448942.0	4469690812.0	30.0	91.0	NA	unknown	NA	NA	ERR688552;ERR688405
FengQ_2015	SID31428	control	69	senior	female	AUT	IlluminaHiSeq	MoBio	25758642.0	unknown	na	30.0	NA	no	60147043.0	5544794381.0	30.0	95.0	NA	unknown	NA	NA	ERR688539;ERR688392
FengQ_2015	SID530167	control	72	senior	female	AUT	IlluminaHiSeq	MoBio	25758642.0	unknown	na	30.0	NA	no	49179178.0	4194580026.0	30.0	91.0	NA	unknown	NA	NA	ERR688600;ERR688453
FengQ_2015	SID530315	control	75	senior	female	AUT	IlluminaHiSeq	MoBio	25758642.0	unknown	na	31.0	NA	no	40973787.0	3858818427.0	30.0	96.0	NA	unknown	NA	NA	ERR688612;ERR688465
FengQ_2015	SID530050	control	71	senior	female	AUT	IlluminaHiSeq	MoBio	25758642.0	unknown	na	29.0	NA	no	41099011.0	3882990247.0	30.0	96.0	NA	unknown	NA	NA	ERR688590;ERR688443
FengQ_2015	SID31160	control	67	senior	female	AUT	IlluminaHiSeq	MoBio	25758642.0	unknown	na	30.0	NA	no	48941530.0	4454783107.0	30.0	93.0	NA	unknown	NA	NA	ERR688514;ERR688367
FengQ_2015	SID530177	control	71	senior	female	AUT	IlluminaHiSeq	MoBio	25758642.0	unknown	na	29.0	NA	no	50250060.0	4755568751.0	30.0	96.0	NA	unknown	NA	NA	ERR688603;ERR688456
FengQ_2015	SID31700	control	72	senior	female	AUT	IlluminaHiSeq	MoBio	25758642.0	unknown	na	28.7	NA	no	66611844.0	6302536870.0	30.0	96.0	NA	unknown	NA	NA	ERR688559;ERR688412
FengQ_2015	SID31714	control	69	senior	female	AUT	IlluminaHiSeq	MoBio	25758642.0	unknown	na	28.3	NA	no	59229738.0	5596599451.0	30.0	97.0	NA	unknown	NA	NA	ERR688562;ERR688415
FengQ_2015	SID31219	control	74	senior	female	AUT	IlluminaHiSeq	MoBio	25758642.0	unknown	na	28.3	NA	no	43000292.0	4040075229.0	30.0	96.0	NA	unknown	NA	NA	ERR688516;ERR688369
FengQ_2015	SID31557	control	74	senior	female	AUT	IlluminaHiSeq	MoBio	25758642.0	unknown	na	28.5	NA	no	55509914.0	5103889033.0	30.0	91.0	NA	unknown	NA	NA	ERR688554;ERR688407
FengQ_2015	SID530154	control	74	senior	female	AUT	IlluminaHiSeq	MoBio	25758642.0	unknown	na	28.5	NA	no	57791617.0	5417863978.0	30.0	97.0	NA	unknown	NA	NA	ERR688598;ERR688451
FengQ_2015	SID530444	control	62	adult	female	AUT	IlluminaHiSeq	MoBio	25758642.0	unknown	na	22.1	NA	no	50926725.0	4531612102.0	30.0	96.0	NA	unknown	NA	NA	ERR688622;ERR688475
FengQ_2015	SID31021	control	60	adult	female	AUT	IlluminaHiSeq	MoBio	25758642.0	unknown	na	22.1	NA	no	60789126.0	5708593447.0	30.0	96.0	NA	unknown	NA	NA	ERR688507;ERR688360
FengQ_2015	SID530074	control	68	senior	female	AUT	IlluminaHiSeq	MoBio	25758642.0	unknown	na	22.1	NA	no	44680548.0	4114576752.0	30.0	95.0	NA	unknown	NA	NA	ERR688594;ERR688447
FengQ_2015	SID530227	control	68	senior	female	AUT	IlluminaHiSeq	MoBio	25758642.0	unknown	na	22.4	NA	no	56519937.0	5413530573.0	30.0	98.0	NA	unknown	NA	NA	ERR688606;ERR688459
FengQ_2015	SID530394	control	67	senior	female	AUT	IlluminaHiSeq	MoBio	25758642.0	unknown	na	22.58	NA	no	66594047.0	6192238434.0	30.0	95.0	NA	unknown	NA	NA	ERR688619;ERR688472
FengQ_2015	SID530295	control	70	senior	female	AUT	IlluminaHiSeq	MoBio	25758642.0	unknown	na	22.67	NA	no	58306781.0	5400290156.0	30.0	93.0	NA	unknown	NA	NA	ERR688610;ERR688463
FengQ_2015	SID530368	control	70	senior	female	AUT	IlluminaHiSeq	MoBio	25758642.0	unknown	na	22.8	NA	no	41919267.0	3928554559.0	30.0	96.0	NA	unknown	NA	NA	ERR688617;ERR688470
FengQ_2015	SID31300	control	68	senior	female	AUT	IlluminaHiSeq	MoBio	25758642.0	unknown	na	21.7	NA	no	58446067.0	5454210916.0	30.0	96.0	NA	unknown	NA	NA	ERR688528;ERR688381
FengQ_2015	SID31452	control	66	senior	female	AUT	IlluminaHiSeq	MoBio	25758642.0	unknown	na	21.7	NA	no	52825648.0	4803936579.0	30.0	94.0	NA	unknown	NA	NA	ERR688544;ERR688397
FengQ_2015	SID31723	control	69	senior	female	AUT	IlluminaHiSeq	MoBio	25758642.0	unknown	na	22.4	NA	no	50461698.0	4789697432.0	30.0	96.0	NA	unknown	NA	NA	ERR688563;ERR688416
FengQ_2015	SID531424	control	46	adult	male	AUT	IlluminaHiSeq	MoBio	25758642.0	unknown	na	28.74	NA	no	47297425.0	4409439027.0	30.0	95.0	NA	unknown	NA	NA	ERR688648;ERR688501
FengQ_2015	SID31009	control	68	senior	male	AUT	IlluminaHiSeq	MoBio	25758642.0	unknown	na	32.0	NA	no	66107961.0	6196998053.0	30.0	96.0	NA	unknown	NA	NA	ERR688506;ERR688359
FengQ_2015	SID530251	control	72	senior	male	AUT	IlluminaHiSeq	MoBio	25758642.0	unknown	na	31.8	NA	no	39476921.0	3771008997.0	30.0	97.0	NA	unknown	NA	NA	ERR688607;ERR688460
FengQ_2015	SID31416	control	72	senior	male	AUT	IlluminaHiSeq	MoBio	25758642.0	unknown	na	31.8	NA	no	59474229.0	5698703690.0	30.0	98.0	NA	unknown	NA	NA	ERR688537;ERR688390
FengQ_2015	SID530119	control	70	senior	male	AUT	IlluminaHiSeq	MoBio	25758642.0	unknown	na	31.6	NA	no	57416977.0	5327616448.0	30.0	95.0	NA	unknown	NA	NA	ERR688596;ERR688449
FengQ_2015	SID31749	control	70	senior	male	AUT	IlluminaHiSeq	MoBio	25758642.0	unknown	na	31.25	NA	no	60841104.0	5672618246.0	30.0	96.0	NA	unknown	NA	NA	ERR688564;ERR688417
FengQ_2015	SID530364	control	63	adult	male	AUT	IlluminaHiSeq	MoBio	25758642.0	unknown	na	31.17	NA	no	44171205.0	4127521919.0	30.0	96.0	NA	unknown	NA	NA	ERR688616;ERR688469
FengQ_2015	SID31328	control	63	adult	male	AUT	IlluminaHiSeq	MoBio	25758642.0	unknown	na	30.9	NA	no	59048476.0	5476469636.0	30.0	95.0	NA	unknown	NA	NA	ERR688529;ERR688382
FengQ_2015	SID530163	control	63	adult	male	AUT	IlluminaHiSeq	MoBio	25758642.0	unknown	na	30.4	NA	no	54206038.0	5093094520.0	30.0	96.0	NA	unknown	NA	NA	ERR688599;ERR688452
FengQ_2015	SID31379	control	63	adult	male	AUT	IlluminaHiSeq	MoBio	25758642.0	unknown	na	30.4	NA	no	63068831.0	5959001442.0	30.0	97.0	NA	unknown	NA	NA	ERR688535;ERR688388
FengQ_2015	SID31112	control	66	senior	male	AUT	IlluminaHiSeq	MoBio	25758642.0	unknown	na	30.3	NA	no	50836391.0	4803585209.0	30.0	97.0	NA	unknown	NA	NA	ERR688510;ERR688363
FengQ_2015	SID31750	control	66	senior	male	AUT	IlluminaHiSeq	MoBio	25758642.0	unknown	na	34.04	NA	no	55640079.0	5136546089.0	30.0	93.0	NA	unknown	NA	NA	ERR688565;ERR688418
FengQ_2015	SID530451	control	68	senior	male	AUT	IlluminaHiSeq	MoBio	25758642.0	unknown	na	29.8	NA	no	62721334.0	5823514323.0	30.0	95.0	NA	unknown	NA	NA	ERR688624;ERR688477
FengQ_2015	SID31129	control	73	senior	male	AUT	IlluminaHiSeq	MoBio	25758642.0	unknown	na	29.7	NA	no	40493976.0	3858680926.0	30.0	97.0	NA	unknown	NA	NA	ERR688511;ERR688364
FengQ_2015	SID530052	control	64	adult	male	AUT	IlluminaHiSeq	MoBio	25758642.0	unknown	na	29.38	NA	no	43128279.0	4075309012.0	30.0	96.0	NA	unknown	NA	NA	ERR688591;ERR688444
FengQ_2015	SID31512	control	64	adult	male	AUT	IlluminaHiSeq	MoBio	25758642.0	unknown	na	29.3	NA	no	48451471.0	4485244293.0	30.0	93.0	NA	unknown	NA	NA	ERR688550;ERR688403
FengQ_2015	SID31236	control	65	adult	male	AUT	IlluminaHiSeq	MoBio	25758642.0	unknown	na	29.06	NA	no	46486458.0	4355968999.0	30.0	95.0	NA	unknown	NA	NA	ERR688520;ERR688373
FengQ_2015	SID31360	control	71	senior	male	AUT	IlluminaHiSeq	MoBio	25758642.0	unknown	na	29.04	NA	no	53813476.0	5060468600.0	30.0	95.0	NA	unknown	NA	NA	ERR688533;ERR688386
FengQ_2015	SID31343	control	72	senior	male	AUT	IlluminaHiSeq	MoBio	25758642.0	unknown	na	29.03	NA	no	46395518.0	4318051431.0	30.0	95.0	NA	unknown	NA	NA	ERR688532;ERR688385
FengQ_2015	SID530215	control	65	adult	male	AUT	IlluminaHiSeq	MoBio	25758642.0	unknown	na	31.22	NA	no	41995786.0	3928814334.0	30.0	96.0	NA	unknown	NA	NA	ERR688605;ERR688458
FengQ_2015	SID31519	control	65	adult	male	AUT	IlluminaHiSeq	MoBio	25758642.0	unknown	na	28.9	NA	no	47430300.0	4423967038.0	30.0	96.0	NA	unknown	NA	NA	ERR688551;ERR688404
FengQ_2015	SID31450	control	67	senior	male	AUT	IlluminaHiSeq	MoBio	25758642.0	unknown	na	23.14	NA	no	39821891.0	3643571766.0	30.0	95.0	NA	unknown	NA	NA	ERR688543;ERR688396
FengQ_2015	SID531414	control	46	adult	male	AUT	IlluminaHiSeq	MoBio	25758642.0	unknown	na	23.15	NA	no	54863689.0	5160814151.0	30.0	96.0	NA	unknown	NA	NA	ERR688646;ERR688499
FengQ_2015	SID31071	control	68	senior	male	AUT	IlluminaHiSeq	MoBio	25758642.0	unknown	na	23.45	NA	no	51945426.0	4913627034.0	30.0	97.0	NA	unknown	NA	NA	ERR688509;ERR688362
FengQ_2015	SID530331	control	70	senior	male	AUT	IlluminaHiSeq	MoBio	25758642.0	unknown	na	23.67	NA	no	46063675.0	4222207210.0	30.0	94.0	NA	unknown	NA	NA	ERR688614;ERR688467
FengQ_2015	SID530258	control	65	adult	male	AUT	IlluminaHiSeq	MoBio	25758642.0	unknown	na	22.03	NA	no	48219384.0	4525858474.0	30.0	96.0	NA	unknown	NA	NA	ERR688608;ERR688461
FengQ_2015	SID31333	control	68	senior	male	AUT	IlluminaHiSeq	MoBio	25758642.0	unknown	na	22.2	NA	no	56964025.0	5355969959.0	30.0	96.0	NA	unknown	NA	NA	ERR688530;ERR688383
FengQ_2015	SID530055	control	64	adult	male	AUT	IlluminaHiSeq	MoBio	25758642.0	unknown	na	22.78	NA	no	44682386.0	4212719129.0	30.0	97.0	NA	unknown	NA	NA	ERR688593;ERR688446
FengQ_2015	SID31267	control	67	senior	male	AUT	IlluminaHiSeq	MoBio	25758642.0	unknown	na	22.79	NA	no	51827763.0	4807739197.0	30.0	93.0	NA	unknown	NA	NA	ERR688523;ERR688376
FengQ_2015	SID31711	control	66	senior	male	AUT	IlluminaHiSeq	MoBio	25758642.0	unknown	na	30.02	NA	no	52930416.0	4975191066.0	30.0	96.0	NA	unknown	NA	NA	ERR688561;ERR688414
FengQ_2015	SID530075	control	63	adult	male	AUT	IlluminaHiSeq	MoBio	25758642.0	unknown	na	34.14	NA	no	45920361.0	4276565640.0	30.0	96.0	NA	unknown	NA	NA	ERR688595;ERR688448
FengQ_2015	SID31637	control	66	senior	male	AUT	IlluminaHiSeq	MoBio	25758642.0	unknown	na	29.98	NA	no	44156304.0	4133028671.0	30.0	96.0	NA	unknown	NA	NA	ERR688557;ERR688410
FengQ_2015	SID31446	CRC	84	senior	female	AUT	IlluminaHiSeq	MoBio	25758642.0	unknown	carcinoma	31.22	NA	no	64347460.0	5954870508.0	30.0	96.0	NA	ptis	NA	NA	ERR688541;ERR688394
FengQ_2015	SID31881	CRC	60	adult	female	AUT	IlluminaHiSeq	MoBio	25758642.0	unknown	carcinoma	30.08	NA	no	67756814.0	6235486686.0	30.0	96.0	NA	t4n1m0	NA	NA	ERR688582;ERR688435
FengQ_2015	SID31866	CRC	73	senior	female	AUT	IlluminaHiSeq	MoBio	25758642.0	unknown	carcinoma	29.75	NA	no	63811898.0	5707545180.0	30.0	93.0	NA	t3n0m0	NA	NA	ERR688569;ERR688422
FengQ_2015	SID31874	CRC	74	senior	female	AUT	IlluminaHiSeq	MoBio	25758642.0	unknown	carcinoma	29.17	NA	no	61606892.0	5697872810.0	30.0	96.0	NA	t4n1m1	NA	NA	ERR688575;ERR688428
FengQ_2015	SID31549	CRC	84	senior	female	AUT	IlluminaHiSeq	MoBio	25758642.0	unknown	carcinoma	27.77	NA	no	56747117.0	5301119382.0	30.0	96.0	NA	t1n0m0	NA	NA	ERR688553;ERR688406
FengQ_2015	SID31878	CRC	52	adult	female	AUT	IlluminaHiSeq	MoBio	25758642.0	unknown	carcinoma	27.14	NA	no	52369180.0	4631097845.0	30.0	95.0	NA	t3n1m0	NA	NA	ERR688579;ERR688432
FengQ_2015	SID531281	CRC	72	senior	female	AUT	IlluminaHiSeq	MoBio	25758642.0	unknown	carcinoma	27.12	NA	no	58412555.0	5394534000.0	30.0	96.0	NA	ptis	NA	NA	ERR688640;ERR688493
FengQ_2015	SID31877	CRC	72	senior	female	AUT	IlluminaHiSeq	MoBio	25758642.0	unknown	carcinoma	26.67	NA	no	55213354.0	5089989422.0	30.0	96.0	NA	t3n1m0	NA	NA	ERR688578;ERR688431
FengQ_2015	SID530373	CRC	47	adult	female	AUT	IlluminaHiSeq	MoBio	25758642.0	unknown	carcinoma	25.78	NA	no	51749458.0	4799275613.0	30.0	96.0	NA	t2n0m0	NA	NA	ERR688618;ERR688471
FengQ_2015	SID531155	CRC	72	senior	female	AUT	IlluminaHiSeq	MoBio	25758642.0	unknown	carcinoma	24.22	NA	no	57291152.0	5330073760.0	30.0	96.0	NA	t1n0m0	NA	NA	ERR688636;ERR688489
FengQ_2015	SID31868	CRC	64	adult	female	AUT	IlluminaHiSeq	MoBio	25758642.0	unknown	carcinoma	24.09	NA	no	45203362.0	4175944271.0	30.0	96.0	NA	t2n0m0	NA	NA	ERR688570;ERR688423
FengQ_2015	SID531361	CRC	72	senior	female	AUT	IlluminaHiSeq	MoBio	25758642.0	unknown	carcinoma	23.83	NA	no	49860850.0	4658201002.0	30.0	96.0	NA	t4n1m0	NA	NA	ERR688643;ERR688496
FengQ_2015	SID531775	CRC	77	senior	female	AUT	IlluminaHiSeq	MoBio	25758642.0	unknown	carcinoma	23.5	NA	no	43379176.0	4032625247.0	30.0	96.0	NA	t3n0m0	NA	NA	ERR688651;ERR688504
FengQ_2015	SID31865	CRC	55	adult	female	AUT	IlluminaHiSeq	MoBio	25758642.0	unknown	carcinoma	23.34	NA	no	39673737.0	3645684389.0	30.0	91.0	NA	t2n0m0	NA	NA	ERR688568;ERR688421
FengQ_2015	SID31223	CRC	65	adult	female	AUT	IlluminaHiSeq	MoBio	25758642.0	unknown	carcinoma	23.31	NA	no	52018377.0	4835999683.0	30.0	96.0	NA	t4n0m0	NA	NA	ERR688517;ERR688370
FengQ_2015	SID531469	CRC	45	adult	female	AUT	IlluminaHiSeq	MoBio	25758642.0	unknown	carcinoma	22.15	NA	no	50337835.0	4709508874.0	30.0	96.0	NA	t2n0m0	NA	NA	ERR688649;ERR688502
FengQ_2015	SID31876	CRC	56	adult	female	AUT	IlluminaHiSeq	MoBio	25758642.0	unknown	carcinoma	20.07	NA	no	58553738.0	5406847458.0	30.0	96.0	NA	t3n2m0	NA	NA	ERR688577;ERR688430
FengQ_2015	SID531416	CRC	63	adult	male	AUT	IlluminaHiSeq	MoBio	25758642.0	unknown	carcinoma	33.56	NA	no	54134207.0	5059776250.0	30.0	96.0	NA	t2n0m0	NA	NA	ERR688647;ERR688500
FengQ_2015	SID31872	CRC	46	adult	male	AUT	IlluminaHiSeq	MoBio	25758642.0	unknown	carcinoma	30.86	NA	no	56338680.0	5196434410.0	30.0	96.0	NA	ptis	NA	NA	ERR688573;ERR688426
FengQ_2015	SID31276	CRC	82	senior	male	AUT	IlluminaHiSeq	MoBio	25758642.0	unknown	carcinoma	30.47	NA	no	47454029.0	4449164619.0	30.0	96.0	NA	ptis	NA	NA	ERR688525;ERR688378
FengQ_2015	SID531333	CRC	69	senior	male	AUT	IlluminaHiSeq	MoBio	25758642.0	unknown	carcinoma	29.94	NA	no	57733146.0	5401200091.0	30.0	96.0	NA	t3n1m0	NA	NA	ERR688641;ERR688494
FengQ_2015	SID531382	CRC	65	adult	male	AUT	IlluminaHiSeq	MoBio	25758642.0	unknown	carcinoma	29.74	NA	no	47198497.0	4370669263.0	30.0	95.0	NA	t3n0m0	NA	NA	ERR688644;ERR688497
FengQ_2015	SID530890	CRC	77	senior	male	AUT	IlluminaHiSeq	MoBio	25758642.0	unknown	carcinoma	29.41	NA	no	59064928.0	5471439051.0	30.0	96.0	NA	ptis	NA	NA	ERR688634;ERR688487
FengQ_2015	SID31237	CRC	67	senior	male	AUT	IlluminaHiSeq	MoBio	25758642.0	unknown	carcinoma	29.4	NA	no	54003642.0	5025871310.0	30.0	96.0	NA	t3n0m0	NA	NA	ERR688521;ERR688374
FengQ_2015	SID31004	CRC	64	adult	male	AUT	IlluminaHiSeq	MoBio	25758642.0	unknown	carcinoma	29.35	NA	no	40898340.0	3649611221.0	30.0	93.0	NA	t1n0m0	NA	NA	ERR688505;ERR688358
FengQ_2015	SID531277	CRC	64	adult	male	AUT	IlluminaHiSeq	MoBio	25758642.0	unknown	carcinoma	29.07	NA	no	52933259.0	4878408862.0	30.0	96.0	NA	t1n0m0	NA	NA	ERR688639;ERR688492
FengQ_2015	SID31871	CRC	72	senior	male	AUT	IlluminaHiSeq	MoBio	25758642.0	unknown	carcinoma	28.41	NA	no	65866129.0	6088271346.0	30.0	96.0	NA	t2n0m0	NA	NA	ERR688572;ERR688425
FengQ_2015	SID31188	CRC	65	adult	male	AUT	IlluminaHiSeq	MoBio	25758642.0	unknown	carcinoma	28.03	NA	no	52506627.0	4856209896.0	30.0	96.0	NA	unknown	NA	NA	ERR688515;ERR688368
FengQ_2015	SID31875	CRC	58	adult	male	AUT	IlluminaHiSeq	MoBio	25758642.0	unknown	carcinoma	27.76	NA	no	60981117.0	5628840356.0	30.0	96.0	NA	t2n0m0	NA	NA	ERR688576;ERR688429
FengQ_2015	SID31884	CRC	54	adult	male	AUT	IlluminaHiSeq	MoBio	25758642.0	unknown	carcinoma	27.34	NA	no	47309414.0	4340003232.0	30.0	96.0	NA	ptis	NA	NA	ERR688567;ERR688420
FengQ_2015	SID31285	CRC	84	senior	male	AUT	IlluminaHiSeq	MoBio	25758642.0	unknown	carcinoma	27.28	NA	no	61029846.0	5538869118.0	30.0	95.0	NA	t3n0m0	NA	NA	ERR688527;ERR688380
FengQ_2015	SID31489	CRC	60	adult	male	AUT	IlluminaHiSeq	MoBio	25758642.0	unknown	carcinoma	26.64	NA	no	47274245.0	4386831217.0	30.0	96.0	NA	t2n0m0	NA	NA	ERR688547;ERR688400
FengQ_2015	SID31685	CRC	74	senior	male	AUT	IlluminaHiSeq	MoBio	25758642.0	unknown	carcinoma	26.37	NA	no	49715050.0	4561413328.0	30.0	95.0	NA	t1n0m0	NA	NA	ERR688558;ERR688411
FengQ_2015	SID531248	CRC	79	senior	male	AUT	IlluminaHiSeq	MoBio	25758642.0	unknown	carcinoma	26.3	NA	no	61002212.0	5666299282.0	30.0	96.0	NA	t3n1m0	NA	NA	ERR688637;ERR688490
FengQ_2015	SID31870	CRC	63	adult	male	AUT	IlluminaHiSeq	MoBio	25758642.0	unknown	carcinoma	25.88	NA	no	59584985.0	5554843364.0	30.0	96.0	NA	t1n0m0	NA	NA	ERR688571;ERR688424
FengQ_2015	SID531128	CRC	52	adult	male	AUT	IlluminaHiSeq	MoBio	25758642.0	unknown	carcinoma	25.73	NA	no	45879581.0	4238158668.0	30.0	97.0	NA	t3n1m0	NA	NA	ERR688635;ERR688488
FengQ_2015	SID31873	CRC	73	senior	male	AUT	IlluminaHiSeq	MoBio	25758642.0	unknown	carcinoma	24.82	NA	no	56842256.0	5217458595.0	30.0	96.0	NA	t3n0m0	NA	NA	ERR688574;ERR688427
FengQ_2015	SID31880	CRC	74	senior	male	AUT	IlluminaHiSeq	MoBio	25758642.0	unknown	carcinoma	24.34	NA	no	62077892.0	5838495526.0	30.0	96.0	NA	t4n2m0	NA	NA	ERR688581;ERR688434
FengQ_2015	SID531766	CRC	72	senior	male	AUT	IlluminaHiSeq	MoBio	25758642.0	unknown	carcinoma	24.34	NA	no	67005809.0	6222651115.0	30.0	96.0	NA	t2n0m0	NA	NA	ERR688650;ERR688503
FengQ_2015	SID31883	CRC	43	adult	male	AUT	IlluminaHiSeq	MoBio	25758642.0	unknown	carcinoma	22.68	NA	no	73468631.0	6833951794.0	30.0	96.0	NA	t3n0m0	NA	NA	ERR688583;ERR688436
FengQ_2015	SID531352	CRC	66	senior	male	AUT	IlluminaHiSeq	MoBio	25758642.0	unknown	carcinoma	22.6	NA	no	64602286.0	5997459345.0	30.0	96.0	NA	t1n0m0	NA	NA	ERR688642;ERR688495
FengQ_2015	SID31367	CRC	86	senior	female	AUT	IlluminaHiSeq	MoBio	25758642.0	unknown	carcinoma	20.5	NA	no	63823566.0	5884167688.0	30.0	95.0	NA	t2n0m0	NA	NA	ERR688534;ERR688387
FengQ_2015	SID31493	CRC	68	senior	male	AUT	IlluminaHiSeq	MoBio	25758642.0	unknown	carcinoma	32.25	NA	no	59975883.0	5529867451.0	30.0	93.0	NA	ptis	NA	NA	ERR688548;ERR688401
FengQ_2015	SID31879	CRC	71	senior	male	AUT	IlluminaHiSeq	MoBio	25758642.0	unknown	carcinoma	29.74	NA	no	55929728.0	5127516824.0	30.0	95.0	NA	t4n2m0	NA	NA	ERR688580;ERR688433
FengQ_2015	SID531274	CRC	77	senior	male	AUT	IlluminaHiSeq	MoBio	25758642.0	unknown	carcinoma	19.16	NA	no	75456959.0	6932193747.0	30.0	96.0	NA	t3n2m0	NA	NA	ERR688638;ERR688491
FengQ_2015	SID31159	CRC	73	senior	male	AUT	IlluminaHiSeq	MoBio	25758642.0	unknown	carcinoma	17.99	NA	no	53697448.0	4950228947.0	30.0	95.0	NA	t3n0m0	NA	NA	ERR688513;ERR688366
FengQ_2015	SID532749	control	55	adult	male	AUT	IlluminaHiSeq	MoBio	25758642.0	unknown	na	27.76	NA	no	48398731.0	4578546329.0	30.0	96.0	NA	unknown	NA	NA	ERR710426;ERR710417
FengQ_2015	SID532779	control	70	senior	male	AUT	IlluminaHiSeq	MoBio	25758642.0	unknown	na	28.72	NA	no	54785115.0	5187301664.0	30.0	96.0	NA	unknown	NA	NA	ERR710427;ERR710418
FengQ_2015	SID532796	control	73	senior	female	AUT	IlluminaHiSeq	MoBio	25758642.0	unknown	na	26.56	NA	no	50845712.0	4754848864.0	30.0	95.0	NA	unknown	NA	NA	ERR710428;ERR710419
FengQ_2015	SID532802	control	68	senior	male	AUT	IlluminaHiSeq	MoBio	25758642.0	unknown	na	23.53	NA	no	41480415.0	3868696049.0	30.0	96.0	NA	unknown	NA	NA	ERR710429;ERR710420
FengQ_2015	SID532826	control	78	senior	male	AUT	IlluminaHiSeq	MoBio	25758642.0	unknown	na	31.22	NA	no	35346002.0	3348368467.0	30.0	97.0	NA	unknown	NA	NA	ERR710430;ERR710421
FengQ_2015	SID532915	control	43	adult	female	AUT	IlluminaHiSeq	MoBio	25758642.0	unknown	na	22.65	NA	no	51594677.0	4886998833.0	30.0	96.0	NA	unknown	NA	NA	ERR710432;ERR710423
VogtmannE_2016	MMRS25211151ST-27-0-0	control	60	adult	female	USA	IlluminaHiSeq	Gnome	27171425.0	unknown	NA	20466035503	NA	no	63464027.0	5328950598.0	1.0	89.0	NA	NA	NA	NA	ERR1293705;ERR1293704;ERR1293703;ERR1293702;ERR1293264;ERR1293263;ERR1293262;ERR1293261
VogtmannE_2016	MMRS14602194ST-27-0-0	CRC	84	senior	female	USA	IlluminaHiSeq	Gnome	27171425.0	unknown	NA	unknown	NA	no	79073471.0	6862241842.0	45.0	90.0	NA	NA	NA	NA	ERR1293813;ERR1293812;ERR1293811;ERR1293810;ERR1293372;ERR1293371;ERR1293370;ERR1293369
VogtmannE_2016	MMRS67247116ST-27-0-0	CRC	53	adult	male	USA	IlluminaHiSeq	Gnome	27171425.0	unknown	NA	253940816327	NA	no	97849642.0	8365936200.0	1.0	89.0	NA	NA	NA	NA	ERR1293657;ERR1293656;ERR1293655;ERR1293654;ERR1293216;ERR1293215;ERR1293214;ERR1293213
VogtmannE_2016	MMRS47685461ST-27-0-0	CRC	67	senior	male	USA	IlluminaHiSeq	Gnome	27171425.0	unknown	NA	331972222222	NA	no	69825150.0	5982293477.0	45.0	90.0	NA	NA	NA	NA	ERR1293749;ERR1293748;ERR1293747;ERR1293746;ERR1293308;ERR1293307;ERR1293306;ERR1293305
VogtmannE_2016	MMRS61683006ST-27-0-0	control	62	adult	female	USA	IlluminaHiSeq	Gnome	27171425.0	unknown	NA	258218549128	NA	no	103681940.0	9042997520.0	45.0	90.0	NA	NA	NA	NA	ERR1293933;ERR1293932;ERR1293931;ERR1293930;ERR1293492;ERR1293491;ERR1293490;ERR1293489
VogtmannE_2016	MMRS12272136ST-27-0-0	CRC	51	adult	male	USA	IlluminaHiSeq	Gnome	27171425.0	unknown	NA	258218549128	NA	no	67377964.0	5546605088.0	5.0	84.0	NA	NA	NA	NA	ERR1293877;ERR1293876;ERR1293875;ERR1293874;ERR1293436;ERR1293435;ERR1293434;ERR1293433
VogtmannE_2016	MMRS57569834ST-27-0-0	control	58	adult	male	USA	IlluminaHiSeq	Gnome	27171425.0	unknown	NA	245307621671	NA	no	64453684.0	5572277177.0	1.0	89.0	NA	NA	NA	NA	ERR1293600;ERR1293599;ERR1293598;ERR1293597;ERR1293159;ERR1293158;ERR1293157;ERR1293156
VogtmannE_2016	MMRS62666492ST-27-0-0	control	60	adult	male	USA	IlluminaHiSeq	Gnome	27171425.0	unknown	NA	334283673469	NA	no	53874212.0	4567726128.0	1.0	89.0	NA	NA	NA	NA	ERR1293552;ERR1293551;ERR1293550;ERR1293549;ERR1293111;ERR1293110;ERR1293109;ERR1293108
VogtmannE_2016	MMRS85548821ST-27-0-0	control	71	senior	male	USA	IlluminaHiSeq	Gnome	27171425.0	unknown	NA	232420408163	NA	no	63845256.0	5557432761.0	45.0	90.0	NA	NA	NA	NA	ERR1293709;ERR1293708;ERR1293707;ERR1293706;ERR1293268;ERR1293267;ERR1293266;ERR1293265
VogtmannE_2016	MMRS51410669ST-27-0-0	CRC	65	adult	male	USA	IlluminaHiSeq	Gnome	27171425.0	unknown	NA	211416796614	NA	no	69018505.0	5988805029.0	45.0	90.0	NA	NA	NA	NA	ERR1293617;ERR1293616;ERR1293615;ERR1293614;ERR1293613;ERR1293176;ERR1293175;ERR1293174;ERR1293173;ERR1293172
VogtmannE_2016	MMRS51737257ST-27-0-0	control	63	adult	male	USA	IlluminaHiSeq	Gnome	27171425.0	unknown	NA	253810751835	NA	no	91314946.0	7768037598.0	1.0	89.0	NA	NA	NA	NA	ERR1293612;ERR1293611;ERR1293610;ERR1293609;ERR1293171;ERR1293170;ERR1293169;ERR1293168
VogtmannE_2016	MMRS18295921ST-27-0-0	CRC	42	adult	male	USA	IlluminaHiSeq	Gnome	27171425.0	unknown	NA	220341202142	NA	no	73085334.0	6384855556.0	45.0	90.0	NA	NA	NA	NA	ERR1293568;ERR1293567;ERR1293566;ERR1293565;ERR1293127;ERR1293126;ERR1293125;ERR1293124
VogtmannE_2016	MMRS81130264ST-27-0-0	control	64	adult	male	USA	IlluminaHiSeq	Gnome	27171425.0	unknown	NA	323538980361	NA	no	69352349.0	6039626590.0	45.0	90.0	NA	NA	NA	NA	ERR1293925;ERR1293924;ERR1293923;ERR1293922;ERR1293484;ERR1293483;ERR1293482;ERR1293481
VogtmannE_2016	MMRS93621581ST-27-0-0	control	60	adult	male	USA	IlluminaHiSeq	Gnome	27171425.0	unknown	NA	231208888889	NA	no	84120338.0	7252089612.0	45.0	90.0	NA	NA	NA	NA	ERR1293809;ERR1293808;ERR1293807;ERR1293806;ERR1293368;ERR1293367;ERR1293366;ERR1293365
VogtmannE_2016	MMRS79893829ST-27-0-0	control	66	senior	male	USA	IlluminaHiSeq	Gnome	27171425.0	unknown	NA	282067901235	NA	no	50521344.0	4082068611.0	1.0	89.0	NA	NA	NA	NA	ERR1293717;ERR1293716;ERR1293715;ERR1293714;ERR1293276;ERR1293275;ERR1293274;ERR1293273
VogtmannE_2016	MMRS88581325ST-27-0-0	control	73	senior	female	USA	IlluminaHiSeq	Gnome	27171425.0	unknown	NA	239206049149	NA	no	63842935.0	5554857561.0	45.0	90.0	NA	NA	NA	NA	ERR1293785;ERR1293784;ERR1293783;ERR1293782;ERR1293344;ERR1293343;ERR1293342;ERR1293341
VogtmannE_2016	MMRS44203591ST-27-0-0	CRC	59	adult	female	USA	IlluminaHiSeq	Gnome	27171425.0	unknown	NA	203691106072	NA	no	49488216.0	4085910732.0	1.0	89.0	NA	NA	NA	NA	ERR1293625;ERR1293624;ERR1293623;ERR1293622;ERR1293184;ERR1293183;ERR1293182;ERR1293181
VogtmannE_2016	MMRS81194191ST-27-0-0	CRC	54	adult	male	USA	IlluminaHiSeq	Gnome	27171425.0	unknown	NA	185594582185	NA	no	54681123.0	4706882156.0	45.0	90.0	NA	NA	NA	NA	ERR1293885;ERR1293884;ERR1293883;ERR1293882;ERR1293444;ERR1293443;ERR1293442;ERR1293441
VogtmannE_2016	MMRS47662059ST-27-0-0	CRC	74	senior	male	USA	IlluminaHiSeq	Gnome	27171425.0	unknown	NA	235960648148	NA	no	51672949.0	4190960110.0	1.0	89.0	NA	NA	NA	NA	ERR1293580;ERR1293579;ERR1293578;ERR1293577;ERR1293139;ERR1293138;ERR1293137;ERR1293136
VogtmannE_2016	MMRS59699117ST-27-0-0	CRC	85	senior	male	USA	IlluminaHiSeq	Gnome	27171425.0	unknown	NA	228049307958	NA	no	46687897.0	4035015942.0	45.0	90.0	NA	NA	NA	NA	ERR1293576;ERR1293575;ERR1293574;ERR1293573;ERR1293135;ERR1293134;ERR1293133;ERR1293132
VogtmannE_2016	MMRS64281211ST-27-0-0	CRC	71	senior	male	USA	IlluminaHiSeq	Gnome	27171425.0	unknown	NA	278330612245	NA	no	83394204.0	7182289591.0	45.0	90.0	NA	NA	NA	NA	ERR1293837;ERR1293836;ERR1293835;ERR1293834;ERR1293396;ERR1293395;ERR1293394;ERR1293393
VogtmannE_2016	MMRS55294627ST-27-0-0	CRC	43	adult	male	USA	IlluminaHiSeq	Gnome	27171425.0	unknown	NA	320255555556	NA	no	74831192.0	6496395167.0	45.0	90.0	NA	NA	NA	NA	ERR1293725;ERR1293724;ERR1293723;ERR1293722;ERR1293284;ERR1293283;ERR1293282;ERR1293281
VogtmannE_2016	MMRS65205033ST-27-0-0	CRC	89	senior	female	USA	IlluminaHiSeq	Gnome	27171425.0	unknown	NA	226717057193	NA	no	49635258.0	4238286126.0	45.0	89.0	NA	NA	NA	NA	ERR1293532;ERR1293531;ERR1293530;ERR1293529;ERR1293091;ERR1293090;ERR1293089;ERR1293088
VogtmannE_2016	MMRS39582183ST-27-0-0	control	39	adult	male	USA	IlluminaHiSeq	Gnome	27171425.0	unknown	NA	234604552469	NA	no	60689081.0	5259440959.0	45.0	90.0	NA	NA	NA	NA	ERR1293665;ERR1293664;ERR1293663;ERR1293662;ERR1293224;ERR1293223;ERR1293222;ERR1293221
VogtmannE_2016	MMRS77321055ST-27-0-0	CRC	31	adult	male	USA	IlluminaHiSeq	Gnome	27171425.0	unknown	NA	196418918919	NA	no	66701830.0	5697551532.0	1.0	89.0	NA	NA	NA	NA	ERR1293520;ERR1293519;ERR1293518;ERR1293517;ERR1293079;ERR1293078;ERR1293077;ERR1293076
VogtmannE_2016	MMRS44587603ST-27-0-0	CRC	66	senior	female	USA	IlluminaHiSeq	Gnome	27171425.0	unknown	NA	314703856749	NA	no	51105550.0	4466195763.0	45.0	90.0	NA	NA	NA	NA	ERR1293829;ERR1293828;ERR1293827;ERR1293826;ERR1293388;ERR1293387;ERR1293386;ERR1293385
VogtmannE_2016	MMRS16644320ST-27-0-0	CRC	53	adult	male	USA	IlluminaHiSeq	Gnome	27171425.0	unknown	NA	278912914104	NA	no	93511487.0	8347390931.0	45.0	93.0	NA	NA	NA	NA	ERR1293741;ERR1293740;ERR1293739;ERR1293738;ERR1293300;ERR1293299;ERR1293298;ERR1293297
VogtmannE_2016	MMRS36405092ST-27-0-0	control	48	adult	male	USA	IlluminaHiSeq	Gnome	27171425.0	unknown	NA	263983673469	NA	no	55086587.0	4746633428.0	45.0	90.0	NA	NA	NA	NA	ERR1293512;ERR1293511;ERR1293510;ERR1293509;ERR1293071;ERR1293070;ERR1293069;ERR1293068
VogtmannE_2016	MMRS84954772ST-27-0-0	CRC	56	adult	male	USA	IlluminaHiSeq	Gnome	27171425.0	unknown	NA	258218549128	NA	no	78612846.0	6632142593.0	2.0	88.0	NA	NA	NA	NA	ERR1293905;ERR1293904;ERR1293903;ERR1293902;ERR1293464;ERR1293463;ERR1293462;ERR1293461
VogtmannE_2016	MMRS20257302ST-27-0-0	control	62	adult	female	USA	IlluminaHiSeq	Gnome	27171425.0	unknown	NA	206657127992	NA	no	54403239.0	4649737800.0	45.0	90.0	NA	NA	NA	NA	ERR1293761;ERR1293760;ERR1293759;ERR1293758;ERR1293320;ERR1293319;ERR1293318;ERR1293317
VogtmannE_2016	MMRS87723283ST-27-0-0	control	42	adult	male	USA	IlluminaHiSeq	Gnome	27171425.0	unknown	NA	276123784963	NA	no	76214251.0	6500263337.0	1.0	89.0	NA	NA	NA	NA	ERR1293869;ERR1293868;ERR1293867;ERR1293866;ERR1293428;ERR1293427;ERR1293426;ERR1293425
VogtmannE_2016	MMRS95277876ST-27-0-0	control	48	adult	male	USA	IlluminaHiSeq	Gnome	27171425.0	unknown	NA	215204081633	NA	no	40050229.0	3416777496.0	45.0	89.0	NA	NA	NA	NA	ERR1293901;ERR1293900;ERR1293899;ERR1293898;ERR1293460;ERR1293459;ERR1293458;ERR1293457
VogtmannE_2016	MMRS68910755ST-27-0-0	CRC	83	senior	female	USA	IlluminaHiSeq	Gnome	27171425.0	unknown	NA	16825182102	NA	no	70008154.0	6241970109.0	45.0	93.0	NA	NA	NA	NA	ERR1293633;ERR1293632;ERR1293631;ERR1293630;ERR1293192;ERR1293191;ERR1293190;ERR1293189
VogtmannE_2016	MMRS31306426ST-27-0-0	CRC	73	senior	male	USA	IlluminaHiSeq	Gnome	27171425.0	unknown	NA	258218549128	NA	no	49768008.0	4060847857.0	1.0	89.0	NA	NA	NA	NA	ERR1293677;ERR1293676;ERR1293675;ERR1293674;ERR1293236;ERR1293235;ERR1293234;ERR1293233
VogtmannE_2016	MMRS99045180ST-27-0-0	CRC	67	senior	female	USA	IlluminaHiSeq	Gnome	27171425.0	unknown	NA	300354003906	NA	no	43709835.0	3764480856.0	45.0	90.0	NA	NA	NA	NA	ERR1293504;ERR1293503;ERR1293502;ERR1293501;ERR1293063;ERR1293062;ERR1293061;ERR1293060
VogtmannE_2016	MMRS14379078ST-27-0-0	CRC	53	adult	male	USA	IlluminaHiSeq	Gnome	27171425.0	unknown	NA	250149219467	NA	no	65466210.0	5623913419.0	2.0	88.0	NA	NA	NA	NA	ERR1293548;ERR1293547;ERR1293546;ERR1293545;ERR1293107;ERR1293106;ERR1293105;ERR1293104
VogtmannE_2016	MMRS65945127ST-27-0-0	CRC	65	adult	male	USA	IlluminaHiSeq	Gnome	27171425.0	unknown	NA	32074985122	NA	no	72466830.0	6219484929.0	45.0	90.0	NA	NA	NA	NA	ERR1293693;ERR1293692;ERR1293691;ERR1293690;ERR1293252;ERR1293251;ERR1293250;ERR1293249
VogtmannE_2016	MMRS17963147ST-27-0-0	control	69	senior	male	USA	IlluminaHiSeq	Gnome	27171425.0	unknown	NA	2406826297	NA	no	67350332.0	5570729597.0	1.0	90.0	NA	NA	NA	NA	ERR1293621;ERR1293620;ERR1293619;ERR1293618;ERR1293180;ERR1293179;ERR1293178;ERR1293177
VogtmannE_2016	MMRS94549160ST-27-0-0	control	76	senior	male	USA	IlluminaHiSeq	Gnome	27171425.0	unknown	NA	238159183673	NA	no	70772737.0	6102492593.0	45.0	90.0	NA	NA	NA	NA	ERR1293745;ERR1293744;ERR1293743;ERR1293742;ERR1293304;ERR1293303;ERR1293302;ERR1293301
VogtmannE_2016	MMRS65742083ST-27-0-0	control	63	adult	male	USA	IlluminaHiSeq	Gnome	27171425.0	unknown	NA	24777027027	NA	no	74418717.0	6285843246.0	1.0	89.0	NA	NA	NA	NA	ERR1293701;ERR1293700;ERR1293699;ERR1293698;ERR1293260;ERR1293259;ERR1293258;ERR1293257
VogtmannE_2016	MMRS85382779ST-27-0-0	CRC	66	senior	male	USA	IlluminaHiSeq	Gnome	27171425.0	unknown	NA	215675675676	NA	no	61382639.0	5352675319.0	45.0	90.0	NA	NA	NA	NA	ERR1293737;ERR1293736;ERR1293735;ERR1293734;ERR1293296;ERR1293295;ERR1293294;ERR1293293
VogtmannE_2016	MMRS25641480ST-27-0-0	CRC	54	adult	female	USA	IlluminaHiSeq	Gnome	27171425.0	unknown	NA	234907551793	NA	no	79793478.0	6848280508.0	45.0	90.0	NA	NA	NA	NA	ERR1293753;ERR1293752;ERR1293751;ERR1293750;ERR1293312;ERR1293311;ERR1293310;ERR1293309
VogtmannE_2016	MMRS15137911ST-27-0-0	CRC	64	adult	female	USA	IlluminaHiSeq	Gnome	27171425.0	unknown	NA	3569921875	NA	no	63838533.0	5707928435.0	45.0	93.0	NA	NA	NA	NA	ERR1293917;ERR1293916;ERR1293915;ERR1293914;ERR1293476;ERR1293475;ERR1293474;ERR1293473
VogtmannE_2016	MMRS44197125ST-27-0-0	CRC	40	adult	male	USA	IlluminaHiSeq	Gnome	27171425.0	unknown	NA	174320571315	NA	no	42592308.0	3816468984.0	45.0	94.0	NA	NA	NA	NA	ERR1293733;ERR1293732;ERR1293731;ERR1293730;ERR1293292;ERR1293291;ERR1293290;ERR1293289
VogtmannE_2016	MMRS24340226ST-27-0-0	CRC	70	senior	male	USA	IlluminaHiSeq	Gnome	27171425.0	unknown	NA	250568055246	NA	no	61178584.0	5032904033.0	1.0	89.0	NA	NA	NA	NA	ERR1293584;ERR1293583;ERR1293582;ERR1293581;ERR1293143;ERR1293142;ERR1293141;ERR1293140
VogtmannE_2016	MMRS65862658ST-27-0-0	control	72	senior	male	USA	IlluminaHiSeq	Gnome	27171425.0	unknown	NA	236252888049	NA	no	70153826.0	6016069815.0	45.0	90.0	NA	NA	NA	NA	ERR1293913;ERR1293912;ERR1293911;ERR1293910;ERR1293472;ERR1293471;ERR1293470;ERR1293469
VogtmannE_2016	MMRS21365932ST-27-0-0	control	56	adult	male	USA	IlluminaHiSeq	Gnome	27171425.0	unknown	NA	229551020408	NA	no	72103979.0	6082232011.0	1.0	89.0	NA	NA	NA	NA	ERR1293653;ERR1293652;ERR1293651;ERR1293650;ERR1293212;ERR1293211;ERR1293210;ERR1293209
VogtmannE_2016	MMRS54246132ST-27-0-0	control	63	adult	male	USA	IlluminaHiSeq	Gnome	27171425.0	unknown	NA	239605702829	NA	no	73146538.0	6218351585.0	45.0	90.0	NA	NA	NA	NA	ERR1293697;ERR1293696;ERR1293695;ERR1293694;ERR1293256;ERR1293255;ERR1293254;ERR1293253
VogtmannE_2016	MMRS78791111ST-27-0-0	CRC	65	adult	male	USA	IlluminaHiSeq	Gnome	27171425.0	unknown	NA	243252595156	NA	no	66262955.0	5672062108.0	45.0	90.0	NA	NA	NA	NA	ERR1293833;ERR1293832;ERR1293831;ERR1293830;ERR1293392;ERR1293391;ERR1293390;ERR1293389
VogtmannE_2016	MMRS81135225ST-27-0-0	control	57	adult	male	USA	IlluminaHiSeq	Gnome	27171425.0	unknown	NA	251071428571	NA	no	76074265.0	6486653317.0	1.0	89.0	NA	NA	NA	NA	ERR1293516;ERR1293515;ERR1293514;ERR1293513;ERR1293075;ERR1293074;ERR1293073;ERR1293072
VogtmannE_2016	MMRS34569532ST-27-0-0	control	72	senior	male	USA	IlluminaHiSeq	Gnome	27171425.0	unknown	NA	231497718707	NA	no	63114287.0	5357791641.0	1.0	89.0	NA	NA	NA	NA	ERR1293865;ERR1293864;ERR1293863;ERR1293862;ERR1293424;ERR1293423;ERR1293422;ERR1293421
VogtmannE_2016	MMRS85438660ST-27-0-0	control	68	senior	male	USA	IlluminaHiSeq	Gnome	27171425.0	unknown	NA	230103154136	NA	no	69808730.0	5863306918.0	2.0	88.0	NA	NA	NA	NA	ERR1293781;ERR1293780;ERR1293779;ERR1293778;ERR1293340;ERR1293339;ERR1293338;ERR1293337
VogtmannE_2016	MMRS97307143ST-27-0-0	control	56	adult	male	USA	IlluminaHiSeq	Gnome	27171425.0	unknown	NA	227077300067	NA	no	63476444.0	5333346730.0	1.0	89.0	NA	NA	NA	NA	ERR1293853;ERR1293852;ERR1293851;ERR1293850;ERR1293412;ERR1293411;ERR1293410;ERR1293409
VogtmannE_2016	MMRS73787048ST-27-0-0	control	47	adult	male	USA	IlluminaHiSeq	Gnome	27171425.0	unknown	NA	244048799841	NA	no	75215034.0	6317074880.0	2.0	88.0	NA	NA	NA	NA	ERR1293773;ERR1293772;ERR1293771;ERR1293770;ERR1293332;ERR1293331;ERR1293330;ERR1293329
VogtmannE_2016	MMRS84159866ST-27-0-0	control	67	senior	female	USA	IlluminaHiSeq	Gnome	27171425.0	unknown	NA	18635739645	NA	no	70787136.0	6063034193.0	45.0	90.0	NA	NA	NA	NA	ERR1293689;ERR1293688;ERR1293687;ERR1293686;ERR1293248;ERR1293247;ERR1293246;ERR1293245
VogtmannE_2016	MMRS35808664ST-27-0-0	control	63	adult	male	USA	IlluminaHiSeq	Gnome	27171425.0	unknown	NA	315810810811	NA	no	80491711.0	6946982549.0	45.0	90.0	NA	NA	NA	NA	ERR1293821;ERR1293820;ERR1293819;ERR1293818;ERR1293380;ERR1293379;ERR1293378;ERR1293377
VogtmannE_2016	MMRS11288076ST-27-0-0	control	65	adult	male	USA	IlluminaHiSeq	Gnome	27171425.0	unknown	NA	234907551793	NA	no	67924141.0	5793273464.0	1.0	89.0	NA	NA	NA	NA	ERR1293500;ERR1293499;ERR1293498;ERR1293497;ERR1293059;ERR1293058;ERR1293057;ERR1293056
VogtmannE_2016	MMRS93508324ST-27-0-0	CRC	71	senior	female	USA	IlluminaHiSeq	Gnome	27171425.0	unknown	NA	unknown	NA	no	66116247.0	5657915436.0	45.0	90.0	NA	NA	NA	NA	ERR1293641;ERR1293640;ERR1293639;ERR1293638;ERR1293200;ERR1293199;ERR1293198;ERR1293197
VogtmannE_2016	MMRS92544445ST-27-0-0	CRC	72	senior	female	USA	IlluminaHiSeq	Gnome	27171425.0	unknown	NA	277981269511	NA	no	77094842.0	6621113804.0	45.0	90.0	NA	NA	NA	NA	ERR1293845;ERR1293844;ERR1293843;ERR1293842;ERR1293404;ERR1293403;ERR1293402;ERR1293401
VogtmannE_2016	MMRS51728985ST-27-0-0	CRC	61	adult	male	USA	IlluminaHiSeq	Gnome	27171425.0	unknown	NA	244097222222	NA	no	4117168.0	351027527.0	1.0	89.0	NA	NA	NA	NA	ERR1293560;ERR1293559;ERR1293558;ERR1293557;ERR1293119;ERR1293118;ERR1293117;ERR1293116
VogtmannE_2016	MMRS81671217ST-27-0-0	CRC	57	adult	male	USA	IlluminaHiSeq	Gnome	27171425.0	unknown	NA	263839369488	NA	no	78372857.0	6677939705.0	1.0	89.0	NA	NA	NA	NA	ERR1293889;ERR1293888;ERR1293887;ERR1293886;ERR1293448;ERR1293447;ERR1293446;ERR1293445
VogtmannE_2016	MMRS51307502ST-27-0-0	control	45	adult	female	USA	IlluminaHiSeq	Gnome	27171425.0	unknown	NA	226187877047	NA	no	54790854.0	4596748294.0	45.0	90.0	NA	NA	NA	NA	ERR1293929;ERR1293928;ERR1293927;ERR1293926;ERR1293488;ERR1293487;ERR1293486;ERR1293485
VogtmannE_2016	MMRS38861560ST-27-0-0	control	76	senior	female	USA	IlluminaHiSeq	Gnome	27171425.0	unknown	NA	221487082546	NA	no	74602745.0	6492491491.0	45.0	91.0	NA	NA	NA	NA	ERR1293849;ERR1293848;ERR1293847;ERR1293846;ERR1293408;ERR1293407;ERR1293406;ERR1293405
VogtmannE_2016	MMRS41266697ST-27-0-0	CRC	54	adult	female	USA	IlluminaHiSeq	Gnome	27171425.0	unknown	NA	240211937716	NA	no	63316536.0	5395765960.0	1.0	89.0	NA	NA	NA	NA	ERR1293801;ERR1293800;ERR1293799;ERR1293798;ERR1293360;ERR1293359;ERR1293358;ERR1293357
VogtmannE_2016	MMRS38954404ST-27-0-0	control	55	adult	female	USA	IlluminaHiSeq	Gnome	27171425.0	unknown	NA	238048911583	NA	no	76618106.0	6583392217.0	45.0	90.0	NA	NA	NA	NA	ERR1293797;ERR1293796;ERR1293795;ERR1293794;ERR1293356;ERR1293355;ERR1293354;ERR1293353
VogtmannE_2016	MMRS72802364ST-27-0-0	CRC	74	senior	male	USA	IlluminaHiSeq	Gnome	27171425.0	unknown	NA	unknown	NA	no	70941068.0	6093136794.0	45.0	90.0	NA	NA	NA	NA	ERR1293572;ERR1293571;ERR1293570;ERR1293569;ERR1293131;ERR1293130;ERR1293129;ERR1293128
VogtmannE_2016	MMRS86168210ST-27-0-0	control	79	senior	male	USA	IlluminaHiSeq	Gnome	27171425.0	unknown	NA	212846020761	NA	no	53381849.0	4658583485.0	45.0	93.0	NA	NA	NA	NA	ERR1293685;ERR1293684;ERR1293683;ERR1293682;ERR1293244;ERR1293243;ERR1293242;ERR1293241
VogtmannE_2016	MMRS72980899ST-27-0-0	CRC	63	adult	male	USA	IlluminaHiSeq	Gnome	27171425.0	unknown	NA	212547241119	NA	no	73684315.0	6279219480.0	1.0	89.0	NA	NA	NA	NA	ERR1293769;ERR1293768;ERR1293767;ERR1293766;ERR1293328;ERR1293327;ERR1293326;ERR1293325
VogtmannE_2016	MMRS77487595ST-27-0-0	CRC	78	senior	male	USA	IlluminaHiSeq	Gnome	27171425.0	unknown	NA	225511249722	NA	no	66299017.0	5623135530.0	45.0	90.0	NA	NA	NA	NA	ERR1293789;ERR1293788;ERR1293787;ERR1293786;ERR1293348;ERR1293347;ERR1293346;ERR1293345
VogtmannE_2016	MMRS32573774ST-27-0-0	control	82	senior	male	USA	IlluminaHiSeq	Gnome	27171425.0	unknown	NA	205244377163	NA	no	73643733.0	6292002235.0	45.0	90.0	NA	NA	NA	NA	ERR1293673;ERR1293672;ERR1293671;ERR1293670;ERR1293232;ERR1293231;ERR1293230;ERR1293229
VogtmannE_2016	MMRS97327636ST-27-0-0	CRC	84	senior	male	USA	IlluminaHiSeq	Gnome	27171425.0	unknown	NA	234776307498	NA	no	59648832.0	4852225968.0	5.0	85.0	NA	NA	NA	NA	ERR1293937;ERR1293936;ERR1293935;ERR1293934;ERR1293496;ERR1293495;ERR1293494;ERR1293493
VogtmannE_2016	MMRS42780924ST-27-0-0	CRC	65	adult	male	USA	IlluminaHiSeq	Gnome	27171425.0	unknown	NA	313777028367	NA	no	142022929.0	12194557586.0	45.0	90.0	NA	NA	NA	NA	ERR1293897;ERR1293896;ERR1293895;ERR1293894;ERR1293456;ERR1293455;ERR1293454;ERR1293453
VogtmannE_2016	MMRS66868025ST-27-0-0	control	58	adult	male	USA	IlluminaHiSeq	Gnome	27171425.0	unknown	NA	26775639754	NA	no	62429661.0	5325670657.0	45.0	91.0	NA	NA	NA	NA	ERR1293508;ERR1293507;ERR1293506;ERR1293505;ERR1293067;ERR1293066;ERR1293065;ERR1293064
VogtmannE_2016	MMRS80093644ST-27-0-0	CRC	31	adult	male	USA	IlluminaHiSeq	Gnome	27171425.0	unknown	NA	195756293161	NA	no	54735621.0	4661241979.0	45.0	90.0	NA	NA	NA	NA	ERR1293649;ERR1293648;ERR1293647;ERR1293646;ERR1293208;ERR1293207;ERR1293206;ERR1293205
VogtmannE_2016	MMRS95674036ST-27-0-0	control	68	senior	female	USA	IlluminaHiSeq	Gnome	27171425.0	unknown	NA	383711577133	NA	no	45900502.0	3908205455.0	1.0	89.0	NA	NA	NA	NA	ERR1293604;ERR1293603;ERR1293602;ERR1293601;ERR1293163;ERR1293162;ERR1293161;ERR1293160
VogtmannE_2016	MMRS57276462ST-27-0-0	control	67	senior	male	USA	IlluminaHiSeq	Gnome	27171425.0	unknown	NA	305020661157	NA	no	67962913.0	5628908369.0	5.0	85.0	NA	NA	NA	NA	ERR1293596;ERR1293595;ERR1293594;ERR1293593;ERR1293155;ERR1293154;ERR1293153;ERR1293152
VogtmannE_2016	MMRS71762412ST-27-0-0	CRC	44	adult	male	USA	IlluminaHiSeq	Gnome	27171425.0	unknown	NA	233648648649	NA	no	68271684.0	6063509780.0	45.0	93.0	NA	NA	NA	NA	ERR1293608;ERR1293607;ERR1293606;ERR1293605;ERR1293167;ERR1293166;ERR1293165;ERR1293164
VogtmannE_2016	MMRS91297590ST-27-0-0	control	36	adult	male	USA	IlluminaHiSeq	Gnome	27171425.0	unknown	NA	21336837929	NA	no	53750027.0	4367662855.0	1.0	89.0	NA	NA	NA	NA	ERR1293588;ERR1293587;ERR1293586;ERR1293585;ERR1293147;ERR1293146;ERR1293145;ERR1293144
VogtmannE_2016	MMRS86958796ST-27-0-0	CRC	55	adult	female	USA	IlluminaHiSeq	Gnome	27171425.0	unknown	NA	316142011834	NA	no	50955911.0	4185665260.0	1.0	90.0	NA	NA	NA	NA	ERR1293721;ERR1293720;ERR1293719;ERR1293718;ERR1293280;ERR1293279;ERR1293278;ERR1293277
VogtmannE_2016	MMRS84085284ST-27-0-0	control	68	senior	male	USA	IlluminaHiSeq	Gnome	27171425.0	unknown	NA	221487082546	NA	no	66511048.0	5337802561.0	6.0	84.0	NA	NA	NA	NA	ERR1293536;ERR1293535;ERR1293534;ERR1293533;ERR1293095;ERR1293094;ERR1293093;ERR1293092
VogtmannE_2016	MMRS92546335ST-27-0-0	control	42	adult	female	USA	IlluminaHiSeq	Gnome	27171425.0	unknown	NA	272055898952	NA	no	46608524.0	3731748843.0	2.0	88.0	NA	NA	NA	NA	ERR1293592;ERR1293591;ERR1293590;ERR1293589;ERR1293151;ERR1293150;ERR1293149;ERR1293148
VogtmannE_2016	MMRS62192467ST-27-0-0	control	70	senior	female	USA	IlluminaHiSeq	Gnome	27171425.0	unknown	NA	311730717549	NA	no	65000414.0	5271237884.0	6.0	84.0	NA	NA	NA	NA	ERR1293857;ERR1293856;ERR1293855;ERR1293854;ERR1293416;ERR1293415;ERR1293414;ERR1293413
VogtmannE_2016	MMRS67096717ST-27-0-0	control	79	senior	male	USA	IlluminaHiSeq	Gnome	27171425.0	unknown	NA	351843261719	NA	no	46356517.0	3665192704.0	5.0	85.0	NA	NA	NA	NA	ERR1293556;ERR1293555;ERR1293554;ERR1293553;ERR1293115;ERR1293114;ERR1293113;ERR1293112
VogtmannE_2016	MMRS43563715ST-27-0-0	CRC	71	senior	male	USA	IlluminaHiSeq	Gnome	27171425.0	unknown	NA	225916824197	NA	no	64152902.0	5506905773.0	45.0	90.0	NA	NA	NA	NA	ERR1293909;ERR1293908;ERR1293907;ERR1293906;ERR1293468;ERR1293467;ERR1293466;ERR1293465
VogtmannE_2016	MMRS33294861ST-27-0-0	control	48	adult	male	USA	IlluminaHiSeq	Gnome	27171425.0	unknown	NA	230859448302	NA	no	61747617.0	5212757345.0	2.0	88.0	NA	NA	NA	NA	ERR1293669;ERR1293668;ERR1293667;ERR1293666;ERR1293228;ERR1293227;ERR1293226;ERR1293225
VogtmannE_2016	MMRS29805707ST-27-0-0	control	49	adult	male	USA	IlluminaHiSeq	Gnome	27171425.0	unknown	NA	333783783784	NA	no	71948103.0	5859991267.0	6.0	84.0	NA	NA	NA	NA	ERR1293713;ERR1293712;ERR1293711;ERR1293710;ERR1293272;ERR1293271;ERR1293270;ERR1293269
VogtmannE_2016	MMRS68630931ST-27-0-0	control	59	adult	male	USA	IlluminaHiSeq	Gnome	27171425.0	unknown	NA	236159634507	NA	no	65907709.0	5699453439.0	45.0	90.0	NA	NA	NA	NA	ERR1293629;ERR1293628;ERR1293627;ERR1293626;ERR1293188;ERR1293187;ERR1293186;ERR1293185
VogtmannE_2016	MMRS95479054ST-27-0-0	control	45	adult	male	USA	IlluminaHiSeq	Gnome	27171425.0	unknown	NA	2436357908	NA	no	71670402.0	5837169628.0	5.0	85.0	NA	NA	NA	NA	ERR1293805;ERR1293804;ERR1293803;ERR1293802;ERR1293364;ERR1293363;ERR1293362;ERR1293361
VogtmannE_2016	MMRS64281551ST-27-0-0	control	63	adult	female	USA	IlluminaHiSeq	Gnome	27171425.0	unknown	NA	283190917969	NA	no	63172677.0	5165640049.0	5.0	84.0	NA	NA	NA	NA	ERR1293528;ERR1293527;ERR1293526;ERR1293525;ERR1293087;ERR1293086;ERR1293085;ERR1293084
VogtmannE_2016	MMRS17603756ST-27-0-0	control	63	adult	female	USA	IlluminaHiSeq	Gnome	27171425.0	unknown	NA	16825182102	NA	no	73088108.0	6225130657.0	1.0	89.0	NA	NA	NA	NA	ERR1293817;ERR1293816;ERR1293815;ERR1293814;ERR1293376;ERR1293375;ERR1293374;ERR1293373
VogtmannE_2016	MMRS40913371ST-27-0-0	control	76	senior	female	USA	IlluminaHiSeq	Gnome	27171425.0	unknown	NA	268837148803	NA	no	74921012.0	6430241030.0	45.0	89.0	NA	NA	NA	NA	ERR1293873;ERR1293872;ERR1293871;ERR1293870;ERR1293432;ERR1293431;ERR1293430;ERR1293429
VogtmannE_2016	MMRS56137463ST-27-0-0	control	51	adult	male	USA	IlluminaHiSeq	Gnome	27171425.0	unknown	NA	248065532451	NA	no	74022262.0	6032135552.0	6.0	84.0	NA	NA	NA	NA	ERR1293757;ERR1293756;ERR1293755;ERR1293754;ERR1293316;ERR1293315;ERR1293314;ERR1293313
VogtmannE_2016	MMRS39415781ST-27-0-0	control	70	senior	female	USA	IlluminaHiSeq	Gnome	27171425.0	unknown	NA	286191715976	NA	no	75955648.0	6478563154.0	1.0	89.0	NA	NA	NA	NA	ERR1293893;ERR1293892;ERR1293891;ERR1293890;ERR1293452;ERR1293451;ERR1293450;ERR1293449
VogtmannE_2016	MMRS41711735ST-27-0-0	CRC	58	adult	male	USA	IlluminaHiSeq	Gnome	27171425.0	unknown	NA	21107149559	NA	no	46357715.0	3741842627.0	1.0	89.0	NA	NA	NA	NA	ERR1293681;ERR1293680;ERR1293679;ERR1293678;ERR1293240;ERR1293239;ERR1293238;ERR1293237
VogtmannE_2016	MMRS54316675ST-27-0-0	CRC	55	adult	male	USA	IlluminaHiSeq	Gnome	27171425.0	unknown	NA	296464100346	NA	no	65561539.0	5552253678.0	1.0	89.0	NA	NA	NA	NA	ERR1293637;ERR1293636;ERR1293635;ERR1293634;ERR1293196;ERR1293195;ERR1293194;ERR1293193
VogtmannE_2016	MMRS86178473ST-27-0-0	CRC	65	adult	male	USA	IlluminaHiSeq	Gnome	27171425.0	unknown	NA	251021622694	NA	no	67156071.0	5720982232.0	1.0	89.0	NA	NA	NA	NA	ERR1293524;ERR1293523;ERR1293522;ERR1293521;ERR1293083;ERR1293082;ERR1293081;ERR1293080
VogtmannE_2016	MMRS77018926ST-27-0-0	CRC	40	adult	male	USA	IlluminaHiSeq	Gnome	27171425.0	unknown	NA	237344419249	NA	no	78074014.0	6671604868.0	45.0	91.0	NA	NA	NA	NA	ERR1293661;ERR1293660;ERR1293659;ERR1293658;ERR1293220;ERR1293219;ERR1293218;ERR1293217
VogtmannE_2016	MMRS62376181ST-27-0-0	CRC	69	senior	female	USA	IlluminaHiSeq	Gnome	27171425.0	unknown	NA	20798816568	NA	no	74664715.0	6044911124.0	6.0	84.0	NA	NA	NA	NA	ERR1293540;ERR1293539;ERR1293538;ERR1293537;ERR1293099;ERR1293098;ERR1293097;ERR1293096
VogtmannE_2016	MMRS34525504ST-27-0-0	CRC	71	senior	male	USA	IlluminaHiSeq	Gnome	27171425.0	unknown	NA	247435954556	NA	no	51489547.0	4201649457.0	1.0	89.0	NA	NA	NA	NA	ERR1293793;ERR1293792;ERR1293791;ERR1293790;ERR1293352;ERR1293351;ERR1293350;ERR1293349
VogtmannE_2016	MMRS96422329ST-27-0-0	CRC	66	senior	male	USA	IlluminaHiSeq	Gnome	27171425.0	unknown	NA	223130331283	NA	no	48055011.0	4141839835.0	45.0	90.0	NA	NA	NA	NA	ERR1293825;ERR1293824;ERR1293823;ERR1293822;ERR1293384;ERR1293383;ERR1293382;ERR1293381
VogtmannE_2016	MMRS43939546ST-27-0-0	CRC	63	adult	female	USA	IlluminaHiSeq	Gnome	27171425.0	unknown	NA	256827916352	NA	no	82888126.0	7111161104.0	1.0	89.0	NA	NA	NA	NA	ERR1293729;ERR1293728;ERR1293727;ERR1293726;ERR1293288;ERR1293287;ERR1293286;ERR1293285
VogtmannE_2016	MMRS90191266ST-27-0-0	CRC	37	adult	male	USA	IlluminaHiSeq	Gnome	27171425.0	unknown	NA	225008650519	NA	no	65757163.0	5498902077.0	2.0	88.0	NA	NA	NA	NA	ERR1293777;ERR1293776;ERR1293775;ERR1293774;ERR1293336;ERR1293335;ERR1293334;ERR1293333
VogtmannE_2016	MMRS11932626ST-27-0-0	control	65	adult	male	USA	IlluminaHiSeq	Gnome	27171425.0	unknown	NA	295647688951	NA	no	44412536.0	3583469911.0	5.0	85.0	NA	NA	NA	NA	ERR1293881;ERR1293880;ERR1293879;ERR1293878;ERR1293440;ERR1293439;ERR1293438;ERR1293437
VogtmannE_2016	MMRS97052561ST-27-0-0	CRC	69	senior	female	USA	IlluminaHiSeq	Gnome	27171425.0	unknown	NA	277597143457	NA	no	87071216.0	7473988352.0	45.0	90.0	NA	NA	NA	NA	ERR1293564;ERR1293563;ERR1293562;ERR1293561;ERR1293123;ERR1293122;ERR1293121;ERR1293120
ThomasAM_2019_a	LILT_GF15_16	CRC	75	senior	male	ITA	Illumina_HiSeq	Qiagen	NA	no	adenocarcinoma	unknown	NA	no	66175864.0	6545886392.0	75.0	100.0	NA	NA	NA	NA	NA
ThomasAM_2019_a	LILT_VF00TL_16	control	71	senior	male	ITA	Illumina_HiSeq	Qiagen	NA	no	NA	25.0	NA	no	104069044.0	10299528166.0	75.0	100.0	NA	NA	NA	NA	NA
ThomasAM_2019_a	LILT_VF06_16	control	70	senior	female	ITA	Illumina_HiSeq	Qiagen	NA	no	NA	20.0	NA	no	66651305.0	6595939229.0	75.0	100.0	NA	NA	NA	NA	NA
ThomasAM_2019_a	LILT_VF100_T016	CRC	64	adult	male	ITA	Illumina_HiSeq	Qiagen	NA	no	adenocarcinoma	30.0	NA	no	66956203.0	6638323208.0	75.0	100.0	NA	NA	NA	NA	NA
ThomasAM_2019_a	LILT_VF107_16	CRC	78	senior	male	ITA	Illumina_HiSeq	Qiagen	NA	no	adenocarcinoma	30.0	NA	no	43550263.0	4308753209.0	75.0	100.0	NA	NA	NA	NA	NA
ThomasAM_2019_a	LILT_VF114_T017	CRC	77	senior	male	ITA	Illumina_HiSeq	Qiagen	NA	no	adenocarcinoma	23.0	NA	no	34401230.0	3409318289.0	75.0	100.0	NA	NA	NA	NA	NA
ThomasAM_2019_a	LILT_VF120_16	CRC	63	adult	male	ITA	Illumina_HiSeq	Qiagen	NA	no	adenocarcinoma	37.0	NA	no	34755638.0	3428782643.0	75.0	100.0	NA	NA	NA	NA	NA
ThomasAM_2019_a	LILT_VF145_T017	CRC	67	senior	male	ITA	Illumina_HiSeq	Qiagen	NA	no	adenocarcinoma	35.0	NA	no	41713482.0	4141186612.0	75.0	100.0	NA	NA	NA	NA	NA
ThomasAM_2019_a	LILT_VF166_T017	CRC	83	senior	female	ITA	Illumina_HiSeq	Qiagen	NA	no	adenocarcinoma	19.0	NA	no	29770856.0	2953105831.0	75.0	100.0	NA	NA	NA	NA	NA
ThomasAM_2019_a	LILT_VF174_T017	CRC	66	senior	male	ITA	Illumina_HiSeq	Qiagen	NA	no	adenocarcinoma	24.0	NA	no	44438002.0	4404363252.0	75.0	100.0	NA	NA	NA	NA	NA
ThomasAM_2019_a	LILT_VF176_T017	CRC	64	adult	male	ITA	Illumina_HiSeq	Qiagen	NA	no	adenocarcinoma	23.0	NA	no	25980666.0	2579568857.0	75.0	100.0	NA	NA	NA	NA	NA
ThomasAM_2019_a	LILT_VF29_16	CRC	74	senior	male	ITA	Illumina_HiSeq	Qiagen	NA	no	adenocarcinoma	25.0	NA	no	61477119.0	6101823780.0	75.0	100.0	NA	NA	NA	NA	NA
ThomasAM_2019_a	LILT_VF31_16	control	59	adult	male	ITA	Illumina_HiSeq	Qiagen	NA	no	NA	26.0	NA	no	38978718.0	3866578060.0	75.0	100.0	NA	NA	NA	NA	NA
ThomasAM_2019_a	LILT_VF40_16	control	68	senior	female	ITA	Illumina_HiSeq	Qiagen	NA	no	NA	22.0	NA	no	57038697.0	5659133186.0	75.0	100.0	NA	NA	NA	NA	NA
ThomasAM_2019_a	LILT_VF43_16	control	60	adult	male	ITA	Illumina_HiSeq	Qiagen	NA	no	NA	22.0	NA	no	34877461.0	3466406226.0	75.0	100.0	NA	NA	NA	NA	NA
ThomasAM_2019_a	LILT_VF65_16	CRC	69	senior	female	ITA	Illumina_HiSeq	Qiagen	NA	no	adenocarcinoma	29.0	NA	no	27681546.0	2738135010.0	75.0	100.0	NA	NA	NA	NA	NA
ThomasAM_2019_a	LILT_VF73_16	CRC	58	adult	male	ITA	Illumina_HiSeq	Qiagen	NA	no	adenocarcinoma	25.0	NA	no	46452013.0	4604402797.0	75.0	100.0	NA	NA	NA	NA	NA
ThomasAM_2019_a	LILT_VF77_16	CRC	70	senior	male	ITA	Illumina_HiSeq	Qiagen	NA	no	adenocarcinoma	24.0	NA	no	76792687.0	7629113479.0	75.0	100.0	NA	NA	NA	NA	NA
ThomasAM_2019_a	LILT_VF84_16	control	58	adult	male	ITA	Illumina_HiSeq	Qiagen	NA	no	NA	24.0	NA	no	38042943.0	3777924318.0	75.0	100.0	NA	NA	NA	NA	NA
ThomasAM_2019_a	LILT_VF95_16	CRC	71	senior	female	ITA	Illumina_HiSeq	Qiagen	NA	no	adenocarcinoma	30.0	NA	no	39177495.0	3892560490.0	75.0	100.0	NA	NA	NA	NA	NA
ThomasAM_2019_a	LILT_VF270_T017	CRC	60	adult	male	ITA	Illumina_HiSeq	Qiagen	NA	no	adenocarcinoma	22.0	NA	no	37203468.0	3698926451.0	75.0	100.0	NA	NA	NA	NA	NA
ThomasAM_2019_a	LILT_VF207_T017	CRC	63	adult	male	ITA	Illumina_HiSeq	Qiagen	NA	no	adenocarcinoma	25.0	NA	no	39950432.0	3968457373.0	75.0	100.0	NA	NA	NA	NA	NA
ThomasAM_2019_a	LILT_VF234_T017	CRC	61	adult	male	ITA	Illumina_HiSeq	Qiagen	NA	no	adenocarcinoma	23.0	NA	no	63130715.0	6264323571.0	75.0	100.0	NA	NA	NA	NA	NA
ThomasAM_2019_a	LILT_VF273_T017	CRC	83	senior	female	ITA	Illumina_HiSeq	Qiagen	NA	no	adenocarcinoma	24.0	NA	no	29524730.0	2931377701.0	75.0	100.0	NA	NA	NA	NA	NA
ThomasAM_2019_a	LILT_VF208_T017	CRC	74	senior	male	ITA	Illumina_HiSeq	Qiagen	NA	no	adenocarcinoma	23.0	NA	no	98953970.0	9821090445.0	75.0	100.0	NA	NA	NA	NA	NA
ThomasAM_2019_a	LILT_VF281_T017	CRC	76	senior	male	ITA	Illumina_HiSeq	Qiagen	NA	no	adenocarcinoma	26.0	NA	no	68486264.0	6806314580.0	75.0	100.0	NA	NA	NA	NA	NA
ThomasAM_2019_a	LILT_VF216_T017	CRC	84	senior	male	ITA	Illumina_HiSeq	Qiagen	NA	no	adenocarcinoma	22.0	NA	no	70097752.0	6963494698.0	75.0	100.0	NA	NA	NA	NA	NA
ThomasAM_2019_a	LILT_VF232_T017	CRC	69	senior	male	ITA	Illumina_HiSeq	Qiagen	NA	no	adenocarcinoma	27.0	NA	no	23895908.0	2372616106.0	75.0	100.0	NA	NA	NA	NA	NA
ThomasAM_2019_a	LILT_VF264_T017	CRC	78	senior	male	ITA	Illumina_HiSeq	Qiagen	NA	no	adenocarcinoma	24.0	NA	no	95245270.0	9467701591.0	75.0	100.0	NA	NA	NA	NA	NA
ThomasAM_2019_a	LILT_VF251_T017	CRC	84	senior	female	ITA	Illumina_HiSeq	Qiagen	NA	no	adenocarcinoma	23.0	NA	no	48510961.0	4819366356.0	75.0	100.0	NA	NA	NA	NA	NA
ThomasAM_2019_a	LILT_VF259_T016	control	71	senior	male	ITA	Illumina_HiSeq	Qiagen	NA	no	NA	24.0	NA	no	27099998.0	2688452841.0	75.0	100.0	NA	NA	NA	NA	NA
ThomasAM_2019_a	LILT_VF255_T016	control	69	senior	male	ITA	Illumina_HiSeq	Qiagen	NA	no	NA	30.0	NA	no	25893393.0	2570627444.0	75.0	100.0	NA	NA	NA	NA	NA
ThomasAM_2019_a	LILT_VF170_T016	control	70	senior	female	ITA	Illumina_HiSeq	Qiagen	NA	no	NA	25.0	NA	no	41640909.0	4121506425.0	75.0	100.0	NA	NA	NA	NA	NA
ThomasAM_2019_a	LILT_VF206_T016	control	80	senior	male	ITA	Illumina_HiSeq	Qiagen	NA	no	NA	24.0	NA	no	84412677.0	8391242127.0	75.0	100.0	NA	NA	NA	NA	NA
ThomasAM_2019_a	LILT_VF212_T016	control	80	senior	female	ITA	Illumina_HiSeq	Qiagen	NA	no	NA	32.0	NA	no	35380321.0	3508445154.0	75.0	100.0	NA	NA	NA	NA	NA
ThomasAM_2019_a	LILT_VF261_T016	control	69	senior	male	ITA	Illumina_HiSeq	Qiagen	NA	no	NA	24.0	NA	no	23394424.0	2322319183.0	75.0	100.0	NA	NA	NA	NA	NA
ThomasAM_2019_a	LILT_VF262_T016	control	64	adult	male	ITA	Illumina_HiSeq	Qiagen	NA	no	NA	27.0	NA	no	59720172.0	5930633469.0	75.0	100.0	NA	NA	NA	NA	NA
ThomasAM_2019_a	LILT_VF263_T016	control	81	senior	female	ITA	Illumina_HiSeq	Qiagen	NA	no	NA	28.0	NA	no	78635168.0	7813332958.0	75.0	100.0	NA	NA	NA	NA	NA
ThomasAM_2019_a	LILT_VF265_T016	control	64	adult	male	ITA	Illumina_HiSeq	Qiagen	NA	no	NA	25.0	NA	no	18376848.0	1822358301.0	75.0	100.0	NA	NA	NA	NA	NA
ThomasAM_2019_a	LILT_VF279_T016	control	61	adult	male	ITA	Illumina_HiSeq	Qiagen	NA	no	NA	22.0	NA	no	79556953.0	7908757559.0	75.0	100.0	NA	NA	NA	NA	NA
ThomasAM_2019_a	LILT_VF300_T016	CRC	57	adult	male	ITA	Illumina_HiSeq	Qiagen	NA	no	adenocarcinoma	30.0	NA	no	85395894.0	8484842935.0	75.0	100.0	NA	NA	NA	NA	NA
ThomasAM_2019_a	LILT_VF10_T016	control	60	adult	female	ITA	Illumina_HiSeq	Qiagen	NA	no	NA	20.0	NA	no	30257800.0	3003060388.0	75.0	100.0	NA	NA	NA	NA	NA
ThomasAM_2019_a	LILT_VF140_T016	control	67	senior	female	ITA	Illumina_HiSeq	Qiagen	NA	no	NA	24.0	NA	no	22776970.0	2258462911.0	75.0	100.0	NA	NA	NA	NA	NA
ThomasAM_2019_a	LILT_VF171_T016	control	77	senior	female	ITA	Illumina_HiSeq	Qiagen	NA	no	NA	unknown	NA	no	134332739.0	13346182566.0	75.0	100.0	NA	NA	NA	NA	NA
ThomasAM_2019_a	LILT_VF18_T016	control	64	adult	male	ITA	Illumina_HiSeq	Qiagen	NA	no	NA	26.0	NA	no	187860709.0	18679271587.0	75.0	100.0	NA	NA	NA	NA	NA
ThomasAM_2019_a	LILT_VF189_T016	control	66	senior	male	ITA	Illumina_HiSeq	Qiagen	NA	no	NA	34.0	NA	no	79837219.0	7919113973.0	75.0	100.0	NA	NA	NA	NA	NA
ThomasAM_2019_b	CRC_MR_SBJ01C_17	CRC	51.0	adult	male	ITA	IlluminaHiSeq	GNOME	NA	no	NA	2086111966	NA	NA	43868542.0	4347430447.0	75.0	100.0	NA	NA	NA	NA	NA
ThomasAM_2019_b	CRC_MR_SBJ02C_17	CRC	51.0	adult	male	ITA	IlluminaHiSeq	GNOME	NA	no	NA	3156167151	NA	NA	43898442.0	4346220764.0	75.0	100.0	NA	NA	NA	NA	NA
ThomasAM_2019_b	CRC_MR_SBJ03H_17	control	52.0	adult	male	ITA	IlluminaHiSeq	GNOME	NA	no	NA	2372281065	NA	NA	62248461.0	6153910114.0	75.0	100.0	NA	NA	NA	NA	NA
ThomasAM_2019_b	CRC_MR_SBJ04C_17	CRC	69.0	senior	male	ITA	IlluminaHiSeq	GNOME	NA	no	NA	28982007	NA	NA	36366179.0	3600392404.0	75.0	100.0	NA	NA	NA	NA	NA
ThomasAM_2019_b	CRC_MR_SBJ05C_17	CRC	46.0	adult	male	ITA	IlluminaHiSeq	GNOME	NA	no	NA	2246003435	NA	NA	45139735.0	4468032703.0	75.0	100.0	NA	NA	NA	NA	NA
ThomasAM_2019_b	CRC_MR_SBJ06C_17	CRC	57.0	adult	male	ITA	IlluminaHiSeq	GNOME	NA	no	NA	2777692989	NA	NA	60592176.0	5988622295.0	75.0	100.0	NA	NA	NA	NA	NA
ThomasAM_2019_b	CRC_MR_SBJ07C_17	CRC	38.0	adult	male	ITA	IlluminaHiSeq	GNOME	NA	no	NA	2704164413	NA	NA	61416613.0	6077990175.0	75.0	100.0	NA	NA	NA	NA	NA
ThomasAM_2019_b	CRC_MR_SBJ10C_17	CRC	68.0	senior	male	ITA	IlluminaHiSeq	GNOME	NA	no	NA	2430248706	NA	NA	50329530.0	4979832567.0	75.0	100.0	NA	NA	NA	NA	NA
ThomasAM_2019_b	CRC_MR_SBJ11C_17	CRC	68.0	senior	female	ITA	IlluminaHiSeq	GNOME	NA	no	NA	NA	NA	NA	48916828.0	4859038231.0	75.0	100.0	NA	NA	NA	NA	NA
ThomasAM_2019_b	CRC_MR_SBJ12C_17	CRC	65.0	adult	male	ITA	IlluminaHiSeq	GNOME	NA	no	NA	2956194571	NA	NA	39541779.0	3893420532.0	75.0	100.0	NA	NA	NA	NA	NA
ThomasAM_2019_b	CRC_MR_SBJ16H_17	control	56.0	adult	male	ITA	IlluminaHiSeq	GNOME	NA	no	NA	2568956193	NA	NA	44260518.0	4398674622.0	75.0	100.0	NA	NA	NA	NA	NA
ThomasAM_2019_b	CRC_MR_SBJ17H_17	control	50.0	adult	male	ITA	IlluminaHiSeq	GNOME	NA	no	NA	2359700421	NA	NA	73496867.0	7310035386.0	75.0	100.0	NA	NA	NA	NA	NA
ThomasAM_2019_b	CRC_MR_SBJ18H_17	control	54.0	adult	male	ITA	IlluminaHiSeq	GNOME	NA	no	NA	2518078512	NA	NA	27453968.0	2727610389.0	75.0	100.0	NA	NA	NA	NA	NA
ThomasAM_2019_b	CRC_MR_SBJ20C_17	CRC	59.0	adult	female	ITA	IlluminaHiSeq	GNOME	NA	no	NA	2899930748	NA	NA	65119701.0	6471743852.0	75.0	100.0	NA	NA	NA	NA	NA
ThomasAM_2019_b	CRC_MR_SBJ21H_17	control	67.0	senior	female	ITA	IlluminaHiSeq	GNOME	NA	no	NA	2043816558	NA	NA	36494066.0	3613112582.0	75.0	100.0	NA	NA	NA	NA	NA
ThomasAM_2019_b	CRC_MR_SBJ22C_17	CRC	62.0	adult	male	ITA	IlluminaHiSeq	GNOME	NA	no	NA	3109789075	NA	NA	23604828.0	2336269953.0	75.0	100.0	NA	NA	NA	NA	NA
ThomasAM_2019_b	CRC_MR_SBJ24H_17	control	66.0	senior	male	ITA	IlluminaHiSeq	GNOME	NA	no	NA	1971332153	NA	NA	36804377.0	3645903179.0	75.0	100.0	NA	NA	NA	NA	NA
ThomasAM_2019_b	CRC_MR_SBJ25C_17	CRC	70.0	senior	male	ITA	IlluminaHiSeq	GNOME	NA	no	NA	2837370242	NA	NA	31480824.0	3117973069.0	75.0	100.0	NA	NA	NA	NA	NA
ThomasAM_2019_b	CRC_MR_SBJ26C_17	CRC	56.0	adult	female	ITA	IlluminaHiSeq	GNOME	NA	no	NA	2782931354	NA	NA	41358998.0	4101051285.0	75.0	100.0	NA	NA	NA	NA	NA
ThomasAM_2019_b	CRC_MR_SBJ27C_17	CRC	61.0	adult	male	ITA	IlluminaHiSeq	GNOME	NA	no	NA	2744059917	NA	NA	36706377.0	3637111009.0	75.0	100.0	NA	NA	NA	NA	NA
ThomasAM_2019_b	CRC_MR_SBJ29C_17	CRC	65.0	adult	male	ITA	IlluminaHiSeq	GNOME	NA	no	NA	2535154137	NA	NA	32390885.0	3210377101.0	75.0	100.0	NA	NA	NA	NA	NA
ThomasAM_2019_b	CRC_MR_SBJ31C_17	CRC	62.0	adult	male	ITA	IlluminaHiSeq	GNOME	NA	no	NA	2664359862	NA	NA	13190360.0	1306864665.0	75.0	100.0	NA	NA	NA	NA	NA
ThomasAM_2019_b	CRC_MR_SBJ32C_17	CRC	39.0	adult	female	ITA	IlluminaHiSeq	GNOME	NA	no	NA	2054988662	NA	NA	31790441.0	3148165940.0	75.0	100.0	NA	NA	NA	NA	NA
ThomasAM_2019_b	CRC_MR_SBJ33C_17	CRC	63.0	adult	male	ITA	IlluminaHiSeq	GNOME	NA	no	NA	2996161169	NA	NA	41330625.0	4096574082.0	75.0	100.0	NA	NA	NA	NA	NA
ThomasAM_2019_b	CRC_MR_SBJ34H_17	control	58.0	adult	female	ITA	IlluminaHiSeq	GNOME	NA	no	NA	203125	NA	NA	38425974.0	3806976294.0	75.0	100.0	NA	NA	NA	NA	NA
ThomasAM_2019_b	CRC_MR_SBJ35C_17	CRC	59.0	adult	male	ITA	IlluminaHiSeq	GNOME	NA	no	NA	2758020032	NA	NA	42524787.0	4205409821.0	75.0	100.0	NA	NA	NA	NA	NA
ThomasAM_2019_b	CRC_MR_SBJ36C_17	CRC	51.0	adult	female	ITA	IlluminaHiSeq	GNOME	NA	no	NA	1943301326	NA	NA	31808126.0	3151820262.0	75.0	100.0	NA	NA	NA	NA	NA
ThomasAM_2019_b	CRC_MR_SBJ37H_17	control	58.0	adult	female	ITA	IlluminaHiSeq	GNOME	NA	no	NA	1768978885	NA	NA	10456845.0	1034879683.0	75.0	100.0	NA	NA	NA	NA	NA
ThomasAM_2019_b	CRC_MR_SBJ39C_17	CRC	58.0	adult	male	ITA	IlluminaHiSeq	GNOME	NA	no	NA	3468609088	NA	NA	30131718.0	2982949375.0	75.0	100.0	NA	NA	NA	NA	NA
ThomasAM_2019_b	CRC_MR_SBJ40C_17	CRC	59.0	adult	male	ITA	IlluminaHiSeq	GNOME	NA	no	NA	3853061224	NA	NA	35163513.0	3483587316.0	75.0	100.0	NA	NA	NA	NA	NA
ThomasAM_2019_b	CRC_MR_SBJ42C_17	CRC	64.0	adult	male	ITA	IlluminaHiSeq	GNOME	NA	no	NA	2493372049	NA	NA	59944791.0	5954642751.0	75.0	100.0	NA	NA	NA	NA	NA
ThomasAM_2019_b	CRC_MR_SBJ45H_17	control	54.0	adult	male	ITA	IlluminaHiSeq	GNOME	NA	no	NA	2448979592	NA	NA	92522014.0	9200046372.0	75.0	100.0	NA	NA	NA	NA	NA
ThomasAM_2019_b	CRC_MR_SBJ46H_17	control	66.0	senior	male	ITA	IlluminaHiSeq	GNOME	NA	no	NA	2170512943	NA	NA	45756759.0	4548795487.0	75.0	100.0	NA	NA	NA	NA	NA
ThomasAM_2019_b	CRC_MR_SBJ47C_17	CRC	50.0	adult	female	ITA	IlluminaHiSeq	GNOME	NA	no	NA	1981784449	NA	NA	33645368.0	3342496938.0	75.0	100.0	NA	NA	NA	NA	NA
ThomasAM_2019_b	CRC_MR_SBJ49C_17	CRC	69.0	senior	male	ITA	IlluminaHiSeq	GNOME	NA	no	NA	2264219297	NA	NA	47699523.0	4733537457.0	75.0	100.0	NA	NA	NA	NA	NA
ThomasAM_2019_b	CRC_MR_SBJ50C_17	CRC	56.0	adult	male	ITA	IlluminaHiSeq	GNOME	NA	no	NA	2518078512	NA	NA	56181745.0	5573403305.0	75.0	100.0	NA	NA	NA	NA	NA
ThomasAM_2019_b	CRC_MR_SBJ51C_17	CRC	62.0	adult	female	ITA	IlluminaHiSeq	GNOME	NA	no	NA	2095717116	NA	NA	24668831.0	2448286377.0	75.0	100.0	NA	NA	NA	NA	NA
ThomasAM_2019_b	CRC_MR_SBJ52C_17	CRC	66.0	senior	female	ITA	IlluminaHiSeq	GNOME	NA	no	NA	2808433211	NA	NA	31846171.0	3158066958.0	75.0	100.0	NA	NA	NA	NA	NA
ThomasAM_2019_b	CRC_MR_SBJ53C_17	CRC	55.0	adult	male	ITA	IlluminaHiSeq	GNOME	NA	no	NA	2936576335	NA	NA	46264048.0	4591336105.0	75.0	100.0	NA	NA	NA	NA	NA
ThomasAM_2019_b	CRC_MR_SBJ55C_17	CRC	67.0	senior	male	ITA	IlluminaHiSeq	GNOME	NA	no	NA	2906976744	NA	NA	35636732.0	3534484981.0	75.0	100.0	NA	NA	NA	NA	NA
ThomasAM_2019_b	CRC_MR_SBJ57H_17	control	66.0	senior	female	ITA	IlluminaHiSeq	GNOME	NA	no	NA	2109375	NA	NA	43890117.0	4354149935.0	75.0	100.0	NA	NA	NA	NA	NA
ThomasAM_2019_b	CRC_MR_SBJ60H_17	control	56.0	adult	male	ITA	IlluminaHiSeq	GNOME	NA	no	NA	2345091822	NA	NA	107211531.0	10646203801.0	75.0	100.0	NA	NA	NA	NA	NA
ThomasAM_2019_b	CRC_MR_SBJ61C_17	CRC	56.0	adult	female	ITA	IlluminaHiSeq	GNOME	NA	no	NA	25390625	NA	NA	63115792.0	6265536349.0	75.0	100.0	NA	NA	NA	NA	NA
ThomasAM_2019_b	CRC_MR_SBJ63H_17	control	58	adult	female	ITA	IlluminaHiSeq	GNOME	NA	no	NA	NA	NA	NA	85236126.0	8455482154.0	75.0	100.0	NA	NA	NA	NA	NA
ThomasAM_2019_b	CRC_MR_SBJ64C_17	CRC	48.0	adult	male	ITA	IlluminaHiSeq	GNOME	NA	no	NA	252675737	NA	NA	75825202.0	7519969732.0	75.0	100.0	NA	NA	NA	NA	NA
ThomasAM_2019_b	CRC_MR_SBJ65H_17	control	53.0	adult	male	ITA	IlluminaHiSeq	GNOME	NA	no	NA	3244997296	NA	NA	41052376.0	4072990715.0	75.0	100.0	NA	NA	NA	NA	NA
ThomasAM_2019_b	CRC_MR_SBJ67H_17	control	46.0	adult	male	ITA	IlluminaHiSeq	GNOME	NA	no	NA	3452708907	NA	NA	40868929.0	4055457779.0	75.0	100.0	NA	NA	NA	NA	NA
ThomasAM_2019_b	CRC_MR_SBJ68H_17	control	60.0	adult	female	ITA	IlluminaHiSeq	GNOME	NA	no	NA	28125	NA	NA	22066831.0	2190922951.0	75.0	100.0	NA	NA	NA	NA	NA
ThomasAM_2019_b	CRC_MR_SBJ69H_17	control	62.0	adult	male	ITA	IlluminaHiSeq	GNOME	NA	no	NA	2869265285	NA	NA	33651354.0	3342450892.0	75.0	100.0	NA	NA	NA	NA	NA
ThomasAM_2019_b	CRC_MR_SBJ73H_17	control	61.0	adult	female	ITA	IlluminaHiSeq	GNOME	NA	no	NA	2196712018	NA	NA	48210550.0	4788180713.0	75.0	100.0	NA	NA	NA	NA	NA
ThomasAM_2019_b	CRC_MR_SBJ74H_17	control	69.0	senior	female	ITA	IlluminaHiSeq	GNOME	NA	no	NA	2636560303	NA	NA	30312297.0	3010192567.0	75.0	100.0	NA	NA	NA	NA	NA
ThomasAM_2019_b	CRC_MR_SBJ75H_17	control	65.0	adult	female	ITA	IlluminaHiSeq	GNOME	NA	no	NA	2338435374	NA	NA	24018036.0	2383792100.0	75.0	100.0	NA	NA	NA	NA	NA
ThomasAM_2019_b	CRC_MR_SBJ77H_17	control	64.0	adult	female	ITA	IlluminaHiSeq	GNOME	NA	no	NA	213251339	NA	NA	27868520.0	2766975730.0	75.0	100.0	NA	NA	NA	NA	NA
ThomasAM_2019_b	CRC_MR_SBJ78H_17	control	54.0	adult	male	ITA	IlluminaHiSeq	GNOME	NA	no	NA	2469135802	NA	NA	23707897.0	2355228152.0	75.0	100.0	NA	NA	NA	NA	NA
ThomasAM_2019_b	CRC_MR_SBJ79H_17	control	67.0	senior	male	ITA	IlluminaHiSeq	GNOME	NA	no	NA	2636560303	NA	NA	35362694.0	3511808501.0	75.0	100.0	NA	NA	NA	NA	NA
ThomasAM_2019_b	CRC_MR_SBJ80H_17	control	40.0	adult	male	ITA	IlluminaHiSeq	GNOME	NA	no	NA	2614927686	NA	NA	26117282.0	2593547633.0	75.0	100.0	NA	NA	NA	NA	NA
ThomasAM_2019_b	CRC_MR_SBJ81H_17	control	60.0	adult	female	ITA	IlluminaHiSeq	GNOME	NA	no	NA	2387511478	NA	NA	57480181.0	5705640120.0	75.0	100.0	NA	NA	NA	NA	NA
ThomasAM_2019_b	CRC_MR_SBJ82H_17	control	69.0	senior	female	ITA	IlluminaHiSeq	GNOME	NA	no	NA	2865013774	NA	NA	37993796.0	3774609997.0	75.0	100.0	NA	NA	NA	NA	NA
ThomasAM_2019_b	CRC_MR_SBJ83H_17	control	47.0	adult	male	ITA	IlluminaHiSeq	GNOME	NA	no	NA	2629757785	NA	NA	25118095.0	2493911666.0	75.0	100.0	NA	NA	NA	NA	NA
ThomasAM_2019_b	CRC_MR_SBJ84H_17	control	41.0	adult	male	ITA	IlluminaHiSeq	GNOME	NA	no	NA	2416326531	NA	NA	39194253.0	3891624174.0	75.0	100.0	NA	NA	NA	NA	NA
WirbelJ_2018	CCMD11006829ST-21-0	CRC	42	adult	female	DEU	IlluminaHiSeq	Gnome	NA	NA	NA	35.0	NA	no	83456496.0	7310970279.0	45.0	94.0	NA	t3n0m0	NA	NA	NA
WirbelJ_2018	CCMD12232071ST-21-0	CRC	75	senior	male	DEU	IlluminaHiSeq	Gnome	NA	NA	NA	28.0	NA	no	65269931.0	5370021950.0	2.0	88.0	NA	t3n2m0	NA	NA	NA
WirbelJ_2018	CCMD13071240ST-21-0	CRC	66	senior	female	DEU	IlluminaHiSeq	Gnome	NA	NA	NA	23.0	NA	no	63427722.0	5486983593.0	45.0	93.0	NA	t3n0m0	NA	NA	NA
WirbelJ_2018	CCMD13934959ST-21-0	CRC	56	adult	male	DEU	IlluminaHiSeq	Gnome	NA	NA	NA	27.0	NA	no	36979669.0	3186342244.0	45.0	93.0	NA	t3n0m0	NA	NA	NA
WirbelJ_2018	CCMD14479708ST-21-0	CRC	74	senior	male	DEU	IlluminaHiSeq	Gnome	NA	NA	NA	26.0	NA	no	65475493.0	5637718108.0	45.0	92.0	NA	t3n0m1	NA	NA	NA
WirbelJ_2018	CCMD18872694ST-21-0	CRC	63	adult	male	DEU	IlluminaHiSeq	Gnome	NA	NA	NA	25.0	NA	no	55300211.0	4780095276.0	45.0	93.0	NA	t3n1m0	NA	NA	NA
WirbelJ_2018	CCMD19497912ST-21-0	CRC	53	adult	female	DEU	IlluminaHiSeq	Gnome	NA	NA	NA	32.0	NA	no	63611916.0	5295778184.0	1.0	89.0	NA	t3n0m0	NA	NA	NA
WirbelJ_2018	CCMD23101338ST-21-0	CRC	69	senior	male	DEU	IlluminaHiSeq	Gnome	NA	NA	NA	28.0	NA	no	84964410.0	7289969024.0	45.0	92.0	NA	t1n0m0	NA	NA	NA
WirbelJ_2018	CCMD25511638ST-21-0	CRC	72	senior	female	DEU	IlluminaHiSeq	Gnome	NA	NA	NA	24.0	NA	no	65970756.0	5638414164.0	1.0	92.0	NA	t1n0m0	NA	NA	NA
WirbelJ_2018	CCMD25963797ST-21-0	CRC	62	adult	male	DEU	IlluminaHiSeq	Gnome	NA	NA	NA	22.0	NA	no	82412988.0	6955065417.0	2.0	91.0	NA	t3n0m0	NA	NA	NA
WirbelJ_2018	CCMD26709089ST-21-0	CRC	66	senior	male	DEU	IlluminaHiSeq	Gnome	NA	NA	NA	26.0	NA	no	81592727.0	6985538898.0	45.0	92.0	NA	t1n0m1	NA	NA	NA
WirbelJ_2018	CCMD26925580ST-21-0	CRC	42	adult	male	DEU	IlluminaHiSeq	Gnome	NA	NA	NA	27.0	NA	no	55059930.0	4714466429.0	45.0	93.0	NA	t2n0m0	NA	NA	NA
WirbelJ_2018	CCMD34381688ST-21-0	CRC	41	adult	male	DEU	IlluminaHiSeq	Gnome	NA	NA	NA	22.0	NA	no	59430177.0	5111006692.0	45.0	92.0	NA	t2n1m0	NA	NA	NA
WirbelJ_2018	CCMD35802077ST-21-0	CRC	71	senior	male	DEU	IlluminaHiSeq	Gnome	NA	NA	NA	30.0	NA	no	62957787.0	5376635637.0	45.0	92.0	NA	t3n0m0	NA	NA	NA
WirbelJ_2018	CCMD40701343ST-21-0	CRC	65	adult	male	DEU	IlluminaHiSeq	Gnome	NA	NA	NA	28.0	NA	no	111517650.0	9271998198.0	2.0	88.0	NA	t3n0m0	NA	NA	NA
WirbelJ_2018	CCMD42428553ST-21-0	CRC	87	senior	male	DEU	IlluminaHiSeq	Gnome	NA	NA	NA	22.0	NA	no	58443148.0	4979909496.0	45.0	92.0	NA	t2n0m1	NA	NA	NA
WirbelJ_2018	CCMD45988061ST-21-0	CRC	62	adult	female	DEU	IlluminaHiSeq	Gnome	NA	NA	NA	27.0	NA	no	33507008.0	2873493609.0	45.0	92.0	NA	t2n0m0	NA	NA	NA
WirbelJ_2018	CCMD46222674ST-21-0	CRC	59	adult	male	DEU	IlluminaHiSeq	Gnome	NA	NA	NA	24.0	NA	no	63799848.0	5487160146.0	45.0	92.0	NA	t3n0m1	NA	NA	NA
WirbelJ_2018	CCMD46947453ST-21-0	CRC	69	senior	male	DEU	IlluminaHiSeq	Gnome	NA	NA	NA	24.0	NA	no	71770689.0	6068657231.0	1.0	89.0	NA	t1n0m0	NA	NA	NA
WirbelJ_2018	CCMD48236717ST-21-0	CRC	58	adult	female	DEU	IlluminaHiSeq	Gnome	NA	NA	NA	32.0	NA	no	78698076.0	6748918253.0	1.0	92.0	NA	t2n0m0	NA	NA	NA
WirbelJ_2018	CCMD50071957ST-21-0	CRC	35	adult	female	DEU	IlluminaHiSeq	Gnome	NA	NA	NA	22.0	NA	no	54578786.0	4733323410.0	45.0	90.0	NA	t4n0m0	NA	NA	NA
WirbelJ_2018	CCMD51864103ST-21-0	CRC	58	adult	male	DEU	IlluminaHiSeq	Gnome	NA	NA	NA	25.0	NA	no	69492180.0	5980859510.0	1.0	92.0	NA	t3n0m0	NA	NA	NA
WirbelJ_2018	CCMD60079086ST-21-0	CRC	73	senior	female	DEU	IlluminaHiSeq	Gnome	NA	NA	NA	22.0	NA	no	51838643.0	4404941313.0	45.0	92.0	NA	t2n0m0	NA	NA	NA
WirbelJ_2018	CCMD63399960ST-21-0	CRC	51	adult	male	DEU	IlluminaHiSeq	Gnome	NA	NA	NA	28.0	NA	no	72877557.0	6243517495.0	1.0	92.0	NA	t3n1m1	NA	NA	NA
WirbelJ_2018	CCMD64503764ST-21-0	CRC	66	senior	male	DEU	IlluminaHiSeq	Gnome	NA	NA	NA	31.0	NA	no	73836742.0	6326842541.0	45.0	92.0	NA	t2n0m0	NA	NA	NA
WirbelJ_2018	CCMD64776337ST-21-0	CRC	79	senior	female	DEU	IlluminaHiSeq	Gnome	NA	NA	NA	26.0	NA	no	69961523.0	5883271932.0	2.0	91.0	NA	t1n0m0	NA	NA	NA
WirbelJ_2018	CCMD72895164ST-21-0	CRC	34	adult	male	DEU	IlluminaHiSeq	Gnome	NA	NA	NA	27.0	NA	no	72332153.0	6079012996.0	2.0	91.0	NA	t4n2m1	NA	NA	NA
WirbelJ_2018	CCMD74930188ST-21-0	CRC	67	senior	male	DEU	IlluminaHiSeq	Gnome	NA	NA	NA	30.0	NA	no	58799892.0	4969364628.0	1.0	89.0	NA	t3n0m0	NA	NA	NA
WirbelJ_2018	CCMD79987997ST-21-0	CRC	70	senior	male	DEU	IlluminaHiSeq	Gnome	NA	NA	NA	25.0	NA	no	69560481.0	6014910420.0	1.0	89.0	NA	t2n0m0	NA	NA	NA
WirbelJ_2018	CCMD82866709ST-21-0	CRC	77	senior	female	DEU	IlluminaHiSeq	Gnome	NA	NA	NA	26.0	NA	no	52355963.0	4478975806.0	45.0	92.0	NA	t3n0m0	NA	NA	NA
WirbelJ_2018	CCMD86114146ST-21-0	CRC	68	senior	male	DEU	IlluminaHiSeq	Gnome	NA	NA	NA	23.0	NA	no	68642651.0	5825187045.0	1.0	92.0	NA	t3n2m1	NA	NA	NA
WirbelJ_2018	CCMD86707194ST-21-0	CRC	53	adult	female	DEU	IlluminaHiSeq	Gnome	NA	NA	NA	31.0	NA	no	71623662.0	6445367470.0	45.0	96.0	NA	t1n0m0	NA	NA	NA
WirbelJ_2018	CCMD87156761ST-21-0	CRC	55	adult	male	DEU	IlluminaHiSeq	Gnome	NA	NA	NA	28.0	NA	no	62222602.0	5370424077.0	45.0	92.0	NA	t2n0m0	NA	NA	NA
WirbelJ_2018	CCMD88272491ST-21-0	CRC	72	senior	male	DEU	IlluminaHiSeq	Gnome	NA	NA	NA	28.0	NA	no	66759905.0	5829021413.0	45.0	93.0	NA	tisn0m0	NA	NA	NA
WirbelJ_2018	CCMD90311071ST-21-0	CRC	43	adult	female	DEU	IlluminaHiSeq	Gnome	NA	NA	NA	22.0	NA	no	61569976.0	5243752766.0	1.0	92.0	NA	t4n2m1	NA	NA	NA
WirbelJ_2018	CCMD93344354ST-21-0	CRC	51	adult	male	DEU	IlluminaHiSeq	Gnome	NA	NA	NA	30.0	NA	no	72207800.0	6328077215.0	45.0	91.0	NA	t3n2m1	NA	NA	NA
WirbelJ_2018	CCMD95433940ST-21-0	CRC	49	adult	female	DEU	IlluminaHiSeq	Gnome	NA	NA	NA	30.0	NA	no	120416190.0	10356558554.0	1.0	92.0	NA	tisn0m0	NA	NA	NA
WirbelJ_2018	CCMD96553385ST-21-0	CRC	90	senior	male	DEU	IlluminaHiSeq	Gnome	NA	NA	NA	28.0	NA	no	68567382.0	5884210312.0	45.0	92.0	NA	t3n2m0	NA	NA	NA
WirbelJ_2018	MMPU29365221ST	control	34	adult	male	DEU	IlluminaHiSeq	Gnome	NA	NA	NA	23.0	NA	no	130049492.0	11373008927.0	45.0	91.0	NA	NA	NA	NA	NA
WirbelJ_2018	MMPU68403337ST	control	30	adult	male	DEU	IlluminaHiSeq	Gnome	NA	NA	NA	31.0	NA	no	132071270.0	11459650610.0	45.0	92.0	NA	NA	NA	NA	NA
WirbelJ_2018	MMPU72854103ST	control	34	adult	male	DEU	IlluminaHiSeq	Gnome	NA	NA	NA	21.0	NA	no	178722733.0	14971137624.0	45.0	91.0	NA	NA	NA	NA	NA
WirbelJ_2018	MMPU84450604ST	control	37	adult	male	DEU	IlluminaHiSeq	Gnome	NA	NA	NA	25.0	NA	no	147843603.0	12182541625.0	2.0	88.0	NA	NA	NA	NA	NA
WirbelJ_2018	MMPU99077057ST	control	49	adult	male	DEU	IlluminaHiSeq	Gnome	NA	NA	NA	26.0	NA	no	104954432.0	9173408933.0	45.0	91.0	NA	NA	NA	NA	NA
WirbelJ_2018	CCMD10032470ST-11-0	control	45	adult	male	DEU	IlluminaHiSeq	Gnome	NA	NA	NA	30.7	NA	no	37708359.0	4639213592.0	45.0	139.0	NA	NA	NA	NA	NA
WirbelJ_2018	CCMD10191450ST-11-0	control	62	adult	female	DEU	IlluminaHiSeq	Gnome	NA	NA	NA	28.5	NA	no	34952407.0	4351849639.0	45.0	140.0	NA	NA	NA	NA	NA
WirbelJ_2018	CCMD15562448ST-11-0	control	74	senior	male	DEU	IlluminaHiSeq	Gnome	NA	NA	NA	22.9	NA	no	34087455.0	4227123245.0	45.0	139.0	NA	NA	NA	NA	NA
WirbelJ_2018	CCMD17410933ST-11-0	control	59	adult	female	DEU	IlluminaHiSeq	Gnome	NA	NA	NA	22.5	NA	no	47437840.0	5908657135.0	45.0	140.0	NA	NA	NA	NA	NA
WirbelJ_2018	CCMD18579000ST-11-0	control	59	adult	female	DEU	IlluminaHiSeq	Gnome	NA	NA	NA	22.7	NA	no	32440106.0	3841428856.0	45.0	135.0	NA	NA	NA	NA	NA
WirbelJ_2018	CCMD18829815ST-11-0	control	62	adult	female	DEU	IlluminaHiSeq	Gnome	NA	NA	NA	27.0	NA	no	34435904.0	4103990976.0	45.0	138.0	NA	NA	NA	NA	NA
WirbelJ_2018	CCMD19168690ST-11-0	CRC	63	adult	female	DEU	IlluminaHiSeq	Gnome	NA	NA	NA	25.8	NA	no	26544429.0	3184004938.0	45.0	138.0	NA	t3n0m0	NA	NA	NA
WirbelJ_2018	CCMD21593359ST-11-0	CRC	85	senior	female	DEU	IlluminaHiSeq	Gnome	NA	NA	NA	19.7	NA	no	75884855.0	7831308075.0	45.0	113.0	NA	t4an1am0	NA	NA	NA
WirbelJ_2018	CCMD21703880ST-11-0	CRC	80	senior	male	DEU	IlluminaHiSeq	Gnome	NA	NA	NA	28.4	NA	no	78839980.0	7813872056.0	45.0	108.0	NA	t3n1am0	NA	NA	NA
WirbelJ_2018	CCMD22852639ST-11-0	control	50	adult	female	DEU	IlluminaHiSeq	Gnome	NA	NA	NA	23.4	NA	no	40833762.0	5070894772.0	45.0	141.0	NA	NA	NA	NA	NA
WirbelJ_2018	CCMD23541216ST-11-0	control	61	adult	male	DEU	IlluminaHiSeq	Gnome	NA	NA	NA	29.9	NA	no	26798255.0	3243885354.0	45.0	138.0	NA	NA	NA	NA	NA
WirbelJ_2018	CCMD25475945ST-11-0	control	59	adult	female	DEU	IlluminaHiSeq	Gnome	NA	NA	NA	22.1	NA	no	36474293.0	4415306489.0	45.0	139.0	NA	NA	NA	NA	NA
WirbelJ_2018	CCMD26625622ST-11-0	control	50	adult	male	DEU	IlluminaHiSeq	Gnome	NA	NA	NA	21.6	NA	no	34820567.0	4252277902.0	45.0	138.0	NA	NA	NA	NA	NA
WirbelJ_2018	CCMD27463710ST-11-0	CRC	81	senior	male	DEU	IlluminaHiSeq	Gnome	NA	NA	NA	26.1	NA	no	93356849.0	9541781198.0	45.0	112.0	NA	t3n0m0	NA	NA	NA
WirbelJ_2018	CCMD27867141ST-11-0	control	55	adult	female	DEU	IlluminaHiSeq	Gnome	NA	NA	NA	18.0	NA	no	49637082.0	6097470744.0	45.0	138.0	NA	NA	NA	NA	NA
WirbelJ_2018	CCMD28738636ST-11-0	control	73	senior	male	DEU	IlluminaHiSeq	Gnome	NA	NA	NA	24.8	NA	no	18266347.0	2235990846.0	45.0	138.0	NA	NA	NA	NA	NA
WirbelJ_2018	CCMD29706695ST-11-0	control	45	adult	male	DEU	IlluminaHiSeq	Gnome	NA	NA	NA	22.1	NA	no	32562260.0	3969615803.0	45.0	138.0	NA	NA	NA	NA	NA
WirbelJ_2018	CCMD30626189ST-11-0	control	51	adult	male	DEU	IlluminaHiSeq	Gnome	NA	NA	NA	26.3	NA	no	42420464.0	5102590952.0	45.0	135.0	NA	NA	NA	NA	NA
WirbelJ_2018	CCMD30627121ST-11-0	control	48	adult	female	DEU	IlluminaHiSeq	Gnome	NA	NA	NA	25.4	NA	no	33003822.0	3958810630.0	45.0	140.0	NA	NA	NA	NA	NA
WirbelJ_2018	CCMD31009081ST-11-0	control	64	adult	male	DEU	IlluminaHiSeq	Gnome	NA	NA	NA	26.8	NA	no	35437309.0	4297110124.0	45.0	135.0	NA	NA	NA	NA	NA
WirbelJ_2018	CCMD31134579ST-11-0	control	75	senior	male	DEU	IlluminaHiSeq	Gnome	NA	NA	NA	21.5	NA	no	37748960.0	4597866250.0	45.0	138.0	NA	NA	NA	NA	NA
WirbelJ_2018	CCMD32288175ST-11-0	control	57	adult	female	DEU	IlluminaHiSeq	Gnome	NA	NA	NA	22.2	NA	no	30703808.0	3820804468.0	45.0	140.0	NA	NA	NA	NA	NA
WirbelJ_2018	CCMD32965613ST-11-0	control	64	adult	male	DEU	IlluminaHiSeq	Gnome	NA	NA	NA	27.6	NA	no	45280497.0	5663096176.0	45.0	139.0	NA	NA	NA	NA	NA
WirbelJ_2018	CCMD35081859ST-11-0	control	60	adult	female	DEU	IlluminaHiSeq	Gnome	NA	NA	NA	25.8	NA	no	39906903.0	4960369607.0	45.0	139.0	NA	NA	NA	NA	NA
WirbelJ_2018	CCMD35633353ST-11-0	CRC	61	adult	male	DEU	IlluminaHiSeq	Gnome	NA	NA	NA	25.2	NA	no	81443541.0	8156827787.0	45.0	112.0	NA	t4an2bm1b	NA	NA	NA
WirbelJ_2018	CCMD35801800ST-11-0	control	29	adult	female	DEU	IlluminaHiSeq	Gnome	NA	NA	NA	30.5	NA	no	42324579.0	5191026043.0	45.0	138.0	NA	NA	NA	NA	NA
WirbelJ_2018	CCMD37575804ST-11-0	control	44	adult	male	DEU	IlluminaHiSeq	Gnome	NA	NA	NA	25.1	NA	no	42726833.0	5239016935.0	45.0	138.0	NA	NA	NA	NA	NA
WirbelJ_2018	CCMD38158721ST-11-0	control	76	senior	male	DEU	IlluminaHiSeq	Gnome	NA	NA	NA	29.5	NA	no	26218660.0	3159908625.0	45.0	139.0	NA	NA	NA	NA	NA
WirbelJ_2018	CCMD39157124ST-11-0	control	56	adult	male	DEU	IlluminaHiSeq	Gnome	NA	NA	NA	25.0	NA	no	39541087.0	4957102126.0	45.0	139.0	NA	NA	NA	NA	NA
WirbelJ_2018	CCMD39882286ST-11-0	control	53	adult	male	DEU	IlluminaHiSeq	Gnome	NA	NA	NA	18.5	NA	no	39610199.0	4897630678.0	45.0	140.0	NA	NA	NA	NA	NA
WirbelJ_2018	CCMD41202658ST-11-0	control	61	adult	female	DEU	IlluminaHiSeq	Gnome	NA	NA	NA	25.4	NA	no	26494425.0	3151787541.0	45.0	138.0	NA	NA	NA	NA	NA
WirbelJ_2018	CCMD41521570ST-11-0	control	67	senior	male	DEU	IlluminaHiSeq	Gnome	NA	NA	NA	24.4	NA	no	32315436.0	3913525742.0	45.0	139.0	NA	NA	NA	NA	NA
WirbelJ_2018	CCMD42956136ST-11-0	CRC	67	senior	female	DEU	IlluminaHiSeq	Gnome	NA	NA	NA	30.1	NA	no	41570684.0	5173146819.0	45.0	138.0	NA	t3n0m0	NA	NA	NA
WirbelJ_2018	CCMD45004878ST-11-0	control	53	adult	male	DEU	IlluminaHiSeq	Gnome	NA	NA	NA	26.2	NA	no	29989143.0	3540776312.0	45.0	137.0	NA	NA	NA	NA	NA
WirbelJ_2018	CCMD45812507ST-11-0	control	75	senior	male	DEU	IlluminaHiSeq	Gnome	NA	NA	NA	30.1	NA	no	34298086.0	4182724716.0	45.0	138.0	NA	NA	NA	NA	NA
WirbelJ_2018	CCMD46727384ST-11-0	control	53	adult	female	DEU	IlluminaHiSeq	Gnome	NA	NA	NA	24.1	NA	no	42393024.0	5310806480.0	45.0	139.0	NA	NA	NA	NA	NA
WirbelJ_2018	CCMD49025643ST-11-0	control	41	adult	male	DEU	IlluminaHiSeq	Gnome	NA	NA	NA	23.8	NA	no	49109243.0	6217935229.0	45.0	140.0	NA	NA	NA	NA	NA
WirbelJ_2018	CCMD49461418ST-11-0	CRC	61	adult	male	DEU	IlluminaHiSeq	Gnome	NA	NA	NA	21.6	NA	no	83884281.0	8204655954.0	45.0	113.0	NA	t3n1m0	NA	NA	NA
WirbelJ_2018	CCMD49942357ST-11-0	control	46	adult	male	DEU	IlluminaHiSeq	Gnome	NA	NA	NA	26.3	NA	no	31722138.0	3817718694.0	45.0	140.0	NA	NA	NA	NA	NA
WirbelJ_2018	CCMD50300306ST-11-0	control	64	adult	male	DEU	IlluminaHiSeq	Gnome	NA	NA	NA	24.6	NA	no	36637752.0	4480077249.0	45.0	139.0	NA	NA	NA	NA	NA
WirbelJ_2018	CCMD50529145ST-11-0	control	63	adult	female	DEU	IlluminaHiSeq	Gnome	NA	NA	NA	20.2	NA	no	31149147.0	3707663709.0	45.0	138.0	NA	NA	NA	NA	NA
WirbelJ_2018	CCMD50538120ST-11-0	control	75	senior	male	DEU	IlluminaHiSeq	Gnome	NA	NA	NA	22.9	NA	no	21906938.0	2558326096.0	45.0	137.0	NA	NA	NA	NA	NA
WirbelJ_2018	CCMD51154251ST-11-0	control	50	adult	male	DEU	IlluminaHiSeq	Gnome	NA	NA	NA	22.6	NA	no	35921835.0	4433617601.0	45.0	138.0	NA	NA	NA	NA	NA
WirbelJ_2018	CCMD51228890ST-11-0	control	65	adult	male	DEU	IlluminaHiSeq	Gnome	NA	NA	NA	32.7	NA	no	32351866.0	3935858548.0	45.0	139.0	NA	NA	NA	NA	NA
WirbelJ_2018	CCMD52117727ST-11-0	CRC	79	senior	male	DEU	IlluminaHiSeq	Gnome	NA	NA	NA	22.4	NA	no	89774389.0	9269088380.0	45.0	114.0	NA	t3n0m0	NA	NA	NA
WirbelJ_2018	CCMD52145360ST-11-0	CRC	81	senior	male	DEU	IlluminaHiSeq	Gnome	NA	NA	NA	24.0	NA	no	84722998.0	8721310850.0	45.0	114.0	NA	t3n2am0	NA	NA	NA
WirbelJ_2018	CCMD53508245ST-11-0	control	61	adult	male	DEU	IlluminaHiSeq	Gnome	NA	NA	NA	27.0	NA	no	46280212.0	5716884869.0	45.0	139.0	NA	NA	NA	NA	NA
WirbelJ_2018	CCMD53522274ST-11-0	control	75	senior	female	DEU	IlluminaHiSeq	Gnome	NA	NA	NA	19.3	NA	no	32649355.0	3988980619.0	45.0	138.0	NA	NA	NA	NA	NA
WirbelJ_2018	CCMD54057834ST-11-0	control	57	adult	female	DEU	IlluminaHiSeq	Gnome	NA	NA	NA	21.2	NA	no	26324082.0	3111604953.0	45.0	135.0	NA	NA	NA	NA	NA
WirbelJ_2018	CCMD56948710ST-11-0	control	66	senior	male	DEU	IlluminaHiSeq	Gnome	NA	NA	NA	30.3	NA	no	31896652.0	3957955624.0	45.0	139.0	NA	NA	NA	NA	NA
WirbelJ_2018	CCMD59540613ST-11-0	control	64	adult	male	DEU	IlluminaHiSeq	Gnome	NA	NA	NA	25.4	NA	no	26827236.0	3219403664.0	45.0	139.0	NA	NA	NA	NA	NA
WirbelJ_2018	CCMD59583015ST-11-0	CRC	61	adult	female	DEU	IlluminaHiSeq	Gnome	NA	NA	NA	24.1	NA	no	91992697.0	9343789168.0	45.0	113.0	NA	t2n1bm0	NA	NA	NA
WirbelJ_2018	CCMD65222621ST-11-0	CRC	63	adult	female	DEU	IlluminaHiSeq	Gnome	NA	NA	NA	28.8	NA	no	80492216.0	7834201797.0	45.0	108.0	NA	t3n0m0	NA	NA	NA
WirbelJ_2018	CCMD65406197ST-11-0	CRC	50	adult	female	DEU	IlluminaHiSeq	Gnome	NA	NA	NA	32.1	NA	no	27972702.0	3459725269.0	45.0	139.0	NA	tisn0m0	NA	NA	NA
WirbelJ_2018	CCMD66848156ST-11-0	control	64	adult	female	DEU	IlluminaHiSeq	Gnome	NA	NA	NA	21.1	NA	no	33154286.0	3900420267.0	45.0	135.0	NA	NA	NA	NA	NA
WirbelJ_2018	CCMD67373733ST-11-0	control	73	senior	male	DEU	IlluminaHiSeq	Gnome	NA	NA	NA	24.5	NA	no	46199982.0	5572421986.0	45.0	135.0	NA	NA	NA	NA	NA
WirbelJ_2018	CCMD68973846ST-11-0	control	64	adult	female	DEU	IlluminaHiSeq	Gnome	NA	NA	NA	22.8	NA	no	19776648.0	2494583830.0	45.0	140.0	NA	NA	NA	NA	NA
WirbelJ_2018	CCMD71242853ST-11-0	CRC	56	adult	female	DEU	IlluminaHiSeq	Gnome	NA	NA	NA	30.0	NA	no	27223597.0	3179743231.0	45.0	136.0	NA	t2n0m0	NA	NA	NA
WirbelJ_2018	CCMD71915439ST-11-0	CRC	60	adult	female	DEU	IlluminaHiSeq	Gnome	NA	NA	NA	35.8	NA	no	75829877.0	7622249125.0	45.0	114.0	NA	t3n1bm1	NA	NA	NA
WirbelJ_2018	CCMD72666896ST-11-0	control	58	adult	female	DEU	IlluminaHiSeq	Gnome	NA	NA	NA	23.8	NA	no	32145534.0	3805648978.0	45.0	138.0	NA	NA	NA	NA	NA
WirbelJ_2018	CCMD72690923ST-11-0	CRC	60	adult	male	DEU	IlluminaHiSeq	Gnome	NA	NA	NA	19.7	NA	no	72772607.0	7178248892.0	45.0	114.0	NA	t3n0m0	NA	NA	NA
WirbelJ_2018	CCMD73128545ST-11-0	control	57	adult	female	DEU	IlluminaHiSeq	Gnome	NA	NA	NA	22.2	NA	no	28802606.0	3521399599.0	45.0	139.0	NA	NA	NA	NA	NA
WirbelJ_2018	CCMD74592084ST-11-0	control	48	adult	male	DEU	IlluminaHiSeq	Gnome	NA	NA	NA	23.0	NA	no	46736941.0	5875509377.0	45.0	139.0	NA	NA	NA	NA	NA
WirbelJ_2018	CCMD75147712ST-11-0	control	53	adult	female	DEU	IlluminaHiSeq	Gnome	NA	NA	NA	23.0	NA	no	19907319.0	2518357317.0	45.0	140.0	NA	NA	NA	NA	NA
WirbelJ_2018	CCMD76222476ST-11-0	CRC	62	adult	female	DEU	IlluminaHiSeq	Gnome	NA	NA	NA	21.3	NA	no	24450208.0	2993424790.0	45.0	139.0	NA	t3n2bm0	NA	NA	NA
WirbelJ_2018	CCMD76409700ST-11-0	control	60	adult	female	DEU	IlluminaHiSeq	Gnome	NA	NA	NA	23.0	NA	no	36562004.0	4504027361.0	45.0	139.0	NA	NA	NA	NA	NA
WirbelJ_2018	CCMD79349503ST-11-0	CRC	60	adult	female	DEU	IlluminaHiSeq	Gnome	NA	NA	NA	21.9	NA	no	22170914.0	2649826307.0	45.0	138.0	NA	t1n0m0	NA	NA	NA
WirbelJ_2018	CCMD85481373ST-11-0	control	69	senior	female	DEU	IlluminaHiSeq	Gnome	NA	NA	NA	25.3	NA	no	16250781.0	1947067979.0	45.0	138.0	NA	NA	NA	NA	NA
WirbelJ_2018	CCMD85661207ST-11-0	control	28	adult	male	DEU	IlluminaHiSeq	Gnome	NA	NA	NA	24.6	NA	no	33033970.0	3963017409.0	45.0	139.0	NA	NA	NA	NA	NA
WirbelJ_2018	CCMD89107682ST-11-0	control	54	adult	female	DEU	IlluminaHiSeq	Gnome	NA	NA	NA	24.6	NA	no	43412558.0	5152729425.0	45.0	138.0	NA	NA	NA	NA	NA
WirbelJ_2018	CCMD89306485ST-11-0	CRC	52	adult	male	DEU	IlluminaHiSeq	Gnome	NA	NA	NA	29.9	NA	no	70529986.0	7093908496.0	45.0	113.0	NA	t3n0m0	NA	NA	NA
WirbelJ_2018	CCMD89643949ST-11-0	control	51	adult	female	DEU	IlluminaHiSeq	Gnome	NA	NA	NA	25.6	NA	no	38953235.0	4866288034.0	45.0	140.0	NA	NA	NA	NA	NA
WirbelJ_2018	CCMD89967135ST-11-0	control	58	adult	female	DEU	IlluminaHiSeq	Gnome	NA	NA	NA	27.0	NA	no	38178196.0	4623164854.0	45.0	138.0	NA	NA	NA	NA	NA
WirbelJ_2018	CCMD92404903ST-11-0	CRC	66	senior	female	DEU	IlluminaHiSeq	Gnome	NA	NA	NA	13.3	NA	no	74399337.0	7585743831.0	45.0	114.0	NA	t3n0m0	NA	NA	NA
WirbelJ_2018	CCMD93755960ST-11-0	control	45	adult	female	DEU	IlluminaHiSeq	Gnome	NA	NA	NA	27.2	NA	no	53721981.0	6512242541.0	45.0	139.0	NA	NA	NA	NA	NA
WirbelJ_2018	CCMD95431029ST-11-0	CRC	84	senior	male	DEU	IlluminaHiSeq	Gnome	NA	NA	NA	24.0	NA	no	48225723.0	4884486871.0	45.0	116.0	NA	t3n0m0	NA	NA	NA
WirbelJ_2018	CCMD95676152ST-11-0	CRC	73	senior	male	DEU	IlluminaHiSeq	Gnome	NA	NA	NA	26.6	NA	no	78873477.0	7981205221.0	45.0	112.0	NA	t2n0m0	NA	NA	NA
WirbelJ_2018	CCMD98198513ST-11-0	control	59	adult	female	DEU	IlluminaHiSeq	Gnome	NA	NA	NA	32.3	NA	no	17214401.0	2121016251.0	45.0	138.0	NA	NA	NA	NA	NA
WirbelJ_2018	CCMD98531134ST-11-0	CRC	59	adult	male	DEU	IlluminaHiSeq	Gnome	NA	NA	NA	26.5	NA	no	83656288.0	8588614425.0	45.0	114.0	NA	t3n1am1	NA	NA	NA
WirbelJ_2018	CCMD98702133ST-11-0	control	37	adult	male	DEU	IlluminaHiSeq	Gnome	NA	NA	NA	24.5	NA	no	49904768.0	6287669339.0	45.0	139.0	NA	NA	NA	NA	NA
WirbelJ_2018	CCMD99440714ST-11-0	control	39	adult	male	DEU	IlluminaHiSeq	Gnome	NA	NA	NA	24.9	NA	no	41699249.0	5165380333.0	45.0	139.0	NA	NA	NA	NA	NA
WirbelJ_2018	CCMD99929634ST-11-0	control	70	senior	male	DEU	IlluminaHiSeq	Gnome	NA	NA	NA	26.7	NA	no	36973483.0	4478703765.0	45.0	138.0	NA	NA	NA	NA	NA
YachidaS_2019	SAMD00115014	CRC	57	adult	male	JPN	NA	NA	NA	NA	NA	268809517	NA	NA	NA	NA	NA	NA	NA	NA	NA	NA	NA
YachidaS_2019	SAMD00115015	control	65	senior	male	JPN	NA	NA	NA	NA	NA	265625	NA	NA	NA	NA	NA	NA	NA	NA	NA	NA	NA
YachidaS_2019	SAMD00115025	control	40	adult	male	JPN	NA	NA	NA	NA	NA	25.0	NA	NA	NA	NA	NA	NA	NA	NA	NA	NA	NA
YachidaS_2019	SAMD00115027	control	67	senior	female	JPN	NA	NA	NA	NA	NA	2017325264	NA	NA	NA	NA	NA	NA	NA	NA	NA	NA	NA
YachidaS_2019	SAMD00114971	control	77	senior	male	JPN	NA	NA	NA	NA	NA	244646016	NA	NA	NA	NA	NA	NA	NA	NA	NA	NA	NA
YachidaS_2019	SAMD00114968	control	64	adult	female	JPN	NA	NA	NA	NA	NA	211552942	NA	NA	NA	NA	NA	NA	NA	NA	NA	NA	NA
YachidaS_2019	SAMD00114970	control	66	senior	female	JPN	NA	NA	NA	NA	NA	2541089965	NA	NA	NA	NA	NA	NA	NA	NA	NA	NA	NA
YachidaS_2019	SAMD00115016	control	66	senior	female	JPN	NA	NA	NA	NA	NA	1906771066	NA	NA	NA	NA	NA	NA	NA	NA	NA	NA	NA
YachidaS_2019	SAMD00115017	control	66	senior	female	JPN	NA	NA	NA	NA	NA	2164127424	NA	NA	NA	NA	NA	NA	NA	NA	NA	NA	NA
YachidaS_2019	SAMD00115019	control	65	senior	male	JPN	NA	NA	NA	NA	NA	2366524436	NA	NA	NA	NA	NA	NA	NA	NA	NA	NA	NA
YachidaS_2019	SAMD00115023	control	77	senior	female	JPN	NA	NA	NA	NA	NA	2363403301	NA	NA	NA	NA	NA	NA	NA	NA	NA	NA	NA
YachidaS_2019	SAMD00114973	control	65	senior	male	JPN	NA	NA	NA	NA	NA	2539343112	NA	NA	NA	NA	NA	NA	NA	NA	NA	NA	NA
YachidaS_2019	SAMD00115018	control	59	adult	male	JPN	NA	NA	NA	NA	NA	2884153181	NA	NA	NA	NA	NA	NA	NA	NA	NA	NA	NA
YachidaS_2019	SAMD00115020	CRC	69	senior	female	JPN	NA	NA	NA	NA	NA	2563691716	NA	NA	NA	NA	NA	NA	NA	NA	NA	NA	NA
YachidaS_2019	SAMD00115022	control	73	senior	female	JPN	NA	NA	NA	NA	NA	20703125	NA	NA	NA	NA	NA	NA	NA	NA	NA	NA	NA
YachidaS_2019	SAMD00115029	CRC	64	adult	female	JPN	NA	NA	NA	NA	NA	2421875	NA	NA	NA	NA	NA	NA	NA	NA	NA	NA	NA
YachidaS_2019	SAMD00115026	CRC	71	senior	female	JPN	NA	NA	NA	NA	NA	2996432818	NA	NA	NA	NA	NA	NA	NA	NA	NA	NA	NA
YachidaS_2019	SAMD00115028	CRC	61	adult	male	JPN	NA	NA	NA	NA	NA	2222906193	NA	NA	NA	NA	NA	NA	NA	NA	NA	NA	NA
YachidaS_2019	SAMD00114997	control	74	senior	male	JPN	NA	NA	NA	NA	NA	2068515024	NA	NA	NA	NA	NA	NA	NA	NA	NA	NA	NA
YachidaS_2019	SAMD00115031	CRC	70	senior	female	JPN	NA	NA	NA	NA	NA	2473246136	NA	NA	NA	NA	NA	NA	NA	NA	NA	NA	NA
YachidaS_2019	SAMD00115032	control	79	senior	female	JPN	NA	NA	NA	NA	NA	2444444444	NA	NA	NA	NA	NA	NA	NA	NA	NA	NA	NA
YachidaS_2019	SAMD00115034	CRC	62	adult	female	JPN	NA	NA	NA	NA	NA	21875	NA	NA	NA	NA	NA	NA	NA	NA	NA	NA	NA
YachidaS_2019	SAMD00115035	CRC	51	adult	male	JPN	NA	NA	NA	NA	NA	2076124567	NA	NA	NA	NA	NA	NA	NA	NA	NA	NA	NA
YachidaS_2019	SAMD00114998	control	70	senior	male	JPN	NA	NA	NA	NA	NA	2366143862	NA	NA	NA	NA	NA	NA	NA	NA	NA	NA	NA
YachidaS_2019	SAMD00115000	CRC	55	adult	male	JPN	NA	NA	NA	NA	NA	2457786715	NA	NA	NA	NA	NA	NA	NA	NA	NA	NA	NA
YachidaS_2019	SAMD00114995	control	66	senior	female	JPN	NA	NA	NA	NA	NA	1955555556	NA	NA	NA	NA	NA	NA	NA	NA	NA	NA	NA
YachidaS_2019	SAMD00114996	control	72	senior	female	JPN	NA	NA	NA	NA	NA	2237034332	NA	NA	NA	NA	NA	NA	NA	NA	NA	NA	NA
YachidaS_2019	SAMD00115033	control	70	senior	male	JPN	NA	NA	NA	NA	NA	2976083761	NA	NA	NA	NA	NA	NA	NA	NA	NA	NA	NA
YachidaS_2019	SAMD00114736	control	55	adult	female	JPN	NA	NA	NA	NA	NA	2355555556	NA	NA	NA	NA	NA	NA	NA	NA	NA	NA	NA
YachidaS_2019	SAMD00114737	CRC	62	adult	female	JPN	NA	NA	NA	NA	NA	2108281329	NA	NA	NA	NA	NA	NA	NA	NA	NA	NA	NA
YachidaS_2019	SAMD00114738	CRC	76	senior	male	JPN	NA	NA	NA	NA	NA	19.17	NA	NA	NA	NA	NA	NA	NA	NA	NA	NA	NA
YachidaS_2019	SAMD00114739	CRC	73	senior	male	JPN	NA	NA	NA	NA	NA	2205805119	NA	NA	NA	NA	NA	NA	NA	NA	NA	NA	NA
YachidaS_2019	SAMD00114744	CRC	52	adult	male	JPN	NA	NA	NA	NA	NA	3102040816	NA	NA	NA	NA	NA	NA	NA	NA	NA	NA	NA
YachidaS_2019	SAMD00114745	control	50	adult	male	JPN	NA	NA	NA	NA	NA	2481632653	NA	NA	NA	NA	NA	NA	NA	NA	NA	NA	NA
YachidaS_2019	SAMD00114747	control	65	senior	male	JPN	NA	NA	NA	NA	NA	2428097534	NA	NA	NA	NA	NA	NA	NA	NA	NA	NA	NA
YachidaS_2019	SAMD00114832	control	77	senior	female	JPN	NA	NA	NA	NA	NA	2128742654	NA	NA	NA	NA	NA	NA	NA	NA	NA	NA	NA
YachidaS_2019	SAMD00114740	CRC	51	adult	female	JPN	NA	NA	NA	NA	NA	1882711104	NA	NA	NA	NA	NA	NA	NA	NA	NA	NA	NA
YachidaS_2019	SAMD00114741	control	78	senior	female	JPN	NA	NA	NA	NA	NA	2403440715	NA	NA	NA	NA	NA	NA	NA	NA	NA	NA	NA
YachidaS_2019	SAMD00114833	control	59	adult	female	JPN	NA	NA	NA	NA	NA	2222222222	NA	NA	NA	NA	NA	NA	NA	NA	NA	NA	NA
YachidaS_2019	SAMD00114742	CRC	67	senior	female	JPN	NA	NA	NA	NA	NA	2432322868	NA	NA	NA	NA	NA	NA	NA	NA	NA	NA	NA
YachidaS_2019	SAMD00114757	control	61	adult	male	JPN	NA	NA	NA	NA	NA	262335558	NA	NA	NA	NA	NA	NA	NA	NA	NA	NA	NA
YachidaS_2019	SAMD00114760	CRC	78	senior	male	JPN	NA	NA	NA	NA	NA	2267995241	NA	NA	NA	NA	NA	NA	NA	NA	NA	NA	NA
YachidaS_2019	SAMD00114834	control	76	senior	male	JPN	NA	NA	NA	NA	NA	2210028959	NA	NA	NA	NA	NA	NA	NA	NA	NA	NA	NA
YachidaS_2019	SAMD00114761	CRC	30	adult	male	JPN	NA	NA	NA	NA	NA	2568956193	NA	NA	NA	NA	NA	NA	NA	NA	NA	NA	NA
YachidaS_2019	SAMD00114763	CRC	69	senior	female	JPN	NA	NA	NA	NA	NA	2355555556	NA	NA	NA	NA	NA	NA	NA	NA	NA	NA	NA
YachidaS_2019	SAMD00114815	control	68	senior	male	JPN	NA	NA	NA	NA	NA	237953599	NA	NA	NA	NA	NA	NA	NA	NA	NA	NA	NA
YachidaS_2019	SAMD00114764	CRC	65	senior	male	JPN	NA	NA	NA	NA	NA	2171806609	NA	NA	NA	NA	NA	NA	NA	NA	NA	NA	NA
YachidaS_2019	SAMD00114974	control	71	senior	female	JPN	NA	NA	NA	NA	NA	1801720643	NA	NA	NA	NA	NA	NA	NA	NA	NA	NA	NA
YachidaS_2019	SAMD00114755	CRC	59	adult	male	JPN	NA	NA	NA	NA	NA	254580659	NA	NA	NA	NA	NA	NA	NA	NA	NA	NA	NA
YachidaS_2019	SAMD00114765	CRC	57	adult	female	JPN	NA	NA	NA	NA	NA	1836900337	NA	NA	NA	NA	NA	NA	NA	NA	NA	NA	NA
YachidaS_2019	SAMD00114766	CRC	64	adult	male	JPN	NA	NA	NA	NA	NA	2305175491	NA	NA	NA	NA	NA	NA	NA	NA	NA	NA	NA
YachidaS_2019	SAMD00114979	control	49	adult	female	JPN	NA	NA	NA	NA	NA	196311176	NA	NA	NA	NA	NA	NA	NA	NA	NA	NA	NA
YachidaS_2019	SAMD00114767	CRC	38	adult	male	JPN	NA	NA	NA	NA	NA	2439105884	NA	NA	NA	NA	NA	NA	NA	NA	NA	NA	NA
YachidaS_2019	SAMD00114769	control	71	senior	male	JPN	NA	NA	NA	NA	NA	2515589569	NA	NA	NA	NA	NA	NA	NA	NA	NA	NA	NA
YachidaS_2019	SAMD00114770	control	73	senior	male	JPN	NA	NA	NA	NA	NA	2581663021	NA	NA	NA	NA	NA	NA	NA	NA	NA	NA	NA
YachidaS_2019	SAMD00114771	control	77	senior	male	JPN	NA	NA	NA	NA	NA	24609375	NA	NA	NA	NA	NA	NA	NA	NA	NA	NA	NA
YachidaS_2019	SAMD00114975	control	70	senior	male	JPN	NA	NA	NA	NA	NA	2927099403	NA	NA	NA	NA	NA	NA	NA	NA	NA	NA	NA
YachidaS_2019	SAMD00114772	CRC	49	adult	male	JPN	NA	NA	NA	NA	NA	2612244898	NA	NA	NA	NA	NA	NA	NA	NA	NA	NA	NA
YachidaS_2019	SAMD00114773	control	78	senior	female	JPN	NA	NA	NA	NA	NA	2042941836	NA	NA	NA	NA	NA	NA	NA	NA	NA	NA	NA
YachidaS_2019	SAMD00114718	control	68	senior	male	JPN	NA	NA	NA	NA	NA	21383942	NA	NA	NA	NA	NA	NA	NA	NA	NA	NA	NA
YachidaS_2019	SAMD00114976	control	70	senior	male	JPN	NA	NA	NA	NA	NA	220603538	NA	NA	NA	NA	NA	NA	NA	NA	NA	NA	NA
YachidaS_2019	SAMD00114977	control	66	senior	male	JPN	NA	NA	NA	NA	NA	2366524436	NA	NA	NA	NA	NA	NA	NA	NA	NA	NA	NA
YachidaS_2019	SAMD00114719	control	60	adult	male	JPN	NA	NA	NA	NA	NA	2222906193	NA	NA	NA	NA	NA	NA	NA	NA	NA	NA	NA
YachidaS_2019	SAMD00114720	control	66	senior	male	JPN	NA	NA	NA	NA	NA	246097337	NA	NA	NA	NA	NA	NA	NA	NA	NA	NA	NA
YachidaS_2019	SAMD00114721	control	72	senior	male	JPN	NA	NA	NA	NA	NA	2520920136	NA	NA	NA	NA	NA	NA	NA	NA	NA	NA	NA
YachidaS_2019	SAMD00114722	CRC	64	adult	male	JPN	NA	NA	NA	NA	NA	2246003435	NA	NA	NA	NA	NA	NA	NA	NA	NA	NA	NA
YachidaS_2019	SAMD00114984	control	62	adult	female	JPN	NA	NA	NA	NA	NA	2264086462	NA	NA	NA	NA	NA	NA	NA	NA	NA	NA	NA
YachidaS_2019	SAMD00114723	CRC	47	adult	male	JPN	NA	NA	NA	NA	NA	2356663223	NA	NA	NA	NA	NA	NA	NA	NA	NA	NA	NA
YachidaS_2019	SAMD00114724	CRC	66	senior	female	JPN	NA	NA	NA	NA	NA	2260026298	NA	NA	NA	NA	NA	NA	NA	NA	NA	NA	NA
YachidaS_2019	SAMD00114800	control	74	senior	male	JPN	NA	NA	NA	NA	NA	2505930703	NA	NA	NA	NA	NA	NA	NA	NA	NA	NA	NA
YachidaS_2019	SAMD00114982	control	64	adult	female	JPN	NA	NA	NA	NA	NA	2319109462	NA	NA	NA	NA	NA	NA	NA	NA	NA	NA	NA
YachidaS_2019	SAMD00114793	CRC	62	adult	male	JPN	NA	NA	NA	NA	NA	2395122659	NA	NA	NA	NA	NA	NA	NA	NA	NA	NA	NA
YachidaS_2019	SAMD00114794	CRC	47	adult	male	JPN	NA	NA	NA	NA	NA	214532872	NA	NA	NA	NA	NA	NA	NA	NA	NA	NA	NA
YachidaS_2019	SAMD00114795	control	47	adult	male	JPN	NA	NA	NA	NA	NA	2067901235	NA	NA	NA	NA	NA	NA	NA	NA	NA	NA	NA
YachidaS_2019	SAMD00114986	control	67	senior	female	JPN	NA	NA	NA	NA	NA	1967516685	NA	NA	NA	NA	NA	NA	NA	NA	NA	NA	NA
YachidaS_2019	SAMD00114796	control	42	adult	male	JPN	NA	NA	NA	NA	NA	33.14	NA	NA	NA	NA	NA	NA	NA	NA	NA	NA	NA
YachidaS_2019	SAMD00114987	control	69	senior	male	JPN	NA	NA	NA	NA	NA	2439105884	NA	NA	NA	NA	NA	NA	NA	NA	NA	NA	NA
YachidaS_2019	SAMD00114797	CRC	63	adult	female	JPN	NA	NA	NA	NA	NA	2013477975	NA	NA	NA	NA	NA	NA	NA	NA	NA	NA	NA
YachidaS_2019	SAMD00114798	control	45	adult	male	JPN	NA	NA	NA	NA	NA	2222222222	NA	NA	NA	NA	NA	NA	NA	NA	NA	NA	NA
YachidaS_2019	SAMD00114799	CRC	73	senior	male	JPN	NA	NA	NA	NA	NA	246097337	NA	NA	NA	NA	NA	NA	NA	NA	NA	NA	NA
YachidaS_2019	SAMD00114753	CRC	65	senior	male	JPN	NA	NA	NA	NA	NA	2130394858	NA	NA	NA	NA	NA	NA	NA	NA	NA	NA	NA
YachidaS_2019	SAMD00114754	CRC	60	adult	female	JPN	NA	NA	NA	NA	NA	2082999519	NA	NA	NA	NA	NA	NA	NA	NA	NA	NA	NA
YachidaS_2019	SAMD00114989	control	76	senior	female	JPN	NA	NA	NA	NA	NA	2497398543	NA	NA	NA	NA	NA	NA	NA	NA	NA	NA	NA
YachidaS_2019	SAMD00114990	control	68	senior	male	JPN	NA	NA	NA	NA	NA	2283737024	NA	NA	NA	NA	NA	NA	NA	NA	NA	NA	NA
YachidaS_2019	SAMD00114991	control	69	senior	female	JPN	NA	NA	NA	NA	NA	2295908766	NA	NA	NA	NA	NA	NA	NA	NA	NA	NA	NA
YachidaS_2019	SAMD00114992	control	62	adult	female	JPN	NA	NA	NA	NA	NA	1905197378	NA	NA	NA	NA	NA	NA	NA	NA	NA	NA	NA
YachidaS_2019	SAMD00114749	CRC	73	senior	female	JPN	NA	NA	NA	NA	NA	1688019391	NA	NA	NA	NA	NA	NA	NA	NA	NA	NA	NA
YachidaS_2019	SAMD00114750	CRC	73	senior	male	JPN	NA	NA	NA	NA	NA	2333546614	NA	NA	NA	NA	NA	NA	NA	NA	NA	NA	NA
YachidaS_2019	SAMD00114780	control	77	senior	female	JPN	NA	NA	NA	NA	NA	2285714286	NA	NA	NA	NA	NA	NA	NA	NA	NA	NA	NA
YachidaS_2019	SAMD00114781	control	64	adult	male	JPN	NA	NA	NA	NA	NA	2051913409	NA	NA	NA	NA	NA	NA	NA	NA	NA	NA	NA
YachidaS_2019	SAMD00114782	CRC	44	adult	female	JPN	NA	NA	NA	NA	NA	2.66728e+16	NA	NA	NA	NA	NA	NA	NA	NA	NA	NA	NA
YachidaS_2019	SAMD00114994	control	44	adult	male	JPN	NA	NA	NA	NA	NA	2205219018	NA	NA	NA	NA	NA	NA	NA	NA	NA	NA	NA
YachidaS_2019	SAMD00114774	CRC	69	senior	male	JPN	NA	NA	NA	NA	NA	1943301326	NA	NA	NA	NA	NA	NA	NA	NA	NA	NA	NA
YachidaS_2019	SAMD00114775	CRC	49	adult	female	JPN	NA	NA	NA	NA	NA	2264086462	NA	NA	NA	NA	NA	NA	NA	NA	NA	NA	NA
YachidaS_2019	SAMD00114776	CRC	69	senior	female	JPN	NA	NA	NA	NA	NA	20613131	NA	NA	NA	NA	NA	NA	NA	NA	NA	NA	NA
YachidaS_2019	SAMD00114777	CRC	70	senior	male	JPN	NA	NA	NA	NA	NA	2676977989	NA	NA	NA	NA	NA	NA	NA	NA	NA	NA	NA
YachidaS_2019	SAMD00114778	control	59	adult	female	JPN	NA	NA	NA	NA	NA	2002884153	NA	NA	NA	NA	NA	NA	NA	NA	NA	NA	NA
YachidaS_2019	SAMD00114779	control	68	senior	male	JPN	NA	NA	NA	NA	NA	231206236	NA	NA	NA	NA	NA	NA	NA	NA	NA	NA	NA
YachidaS_2019	SAMD00114730	control	75	senior	female	JPN	NA	NA	NA	NA	NA	1836547291	NA	NA	NA	NA	NA	NA	NA	NA	NA	NA	NA
YachidaS_2019	SAMD00115001	control	70	senior	male	JPN	NA	NA	NA	NA	NA	2571166208	NA	NA	NA	NA	NA	NA	NA	NA	NA	NA	NA
YachidaS_2019	SAMD00114731	CRC	70	senior	female	JPN	NA	NA	NA	NA	NA	2190758246	NA	NA	NA	NA	NA	NA	NA	NA	NA	NA	NA
YachidaS_2019	SAMD00114732	CRC	68	senior	female	JPN	NA	NA	NA	NA	NA	2178649237	NA	NA	NA	NA	NA	NA	NA	NA	NA	NA	NA
YachidaS_2019	SAMD00114733	CRC	66	senior	male	JPN	NA	NA	NA	NA	NA	2467550027	NA	NA	NA	NA	NA	NA	NA	NA	NA	NA	NA
YachidaS_2019	SAMD00114734	control	72	senior	male	JPN	NA	NA	NA	NA	NA	2213673973	NA	NA	NA	NA	NA	NA	NA	NA	NA	NA	NA
YachidaS_2019	SAMD00114726	CRC	66	senior	male	JPN	NA	NA	NA	NA	NA	2205805119	NA	NA	NA	NA	NA	NA	NA	NA	NA	NA	NA
YachidaS_2019	SAMD00114727	CRC	61	adult	male	JPN	NA	NA	NA	NA	NA	2829334541	NA	NA	NA	NA	NA	NA	NA	NA	NA	NA	NA
YachidaS_2019	SAMD00114728	CRC	45	adult	male	JPN	NA	NA	NA	NA	NA	2061925365	NA	NA	NA	NA	NA	NA	NA	NA	NA	NA	NA
YachidaS_2019	SAMD00115002	control	75	senior	male	JPN	NA	NA	NA	NA	NA	2230814991	NA	NA	NA	NA	NA	NA	NA	NA	NA	NA	NA
YachidaS_2019	SAMD00115003	control	76	senior	male	JPN	NA	NA	NA	NA	NA	23828125	NA	NA	NA	NA	NA	NA	NA	NA	NA	NA	NA
YachidaS_2019	SAMD00115004	control	45	adult	female	JPN	NA	NA	NA	NA	NA	1922768787	NA	NA	NA	NA	NA	NA	NA	NA	NA	NA	NA
YachidaS_2019	SAMD00114789	control	58	adult	female	JPN	NA	NA	NA	NA	NA	2254657648	NA	NA	NA	NA	NA	NA	NA	NA	NA	NA	NA
YachidaS_2019	SAMD00114791	control	62	adult	female	JPN	NA	NA	NA	NA	NA	19921875	NA	NA	NA	NA	NA	NA	NA	NA	NA	NA	NA
YachidaS_2019	SAMD00114792	control	67	senior	female	JPN	NA	NA	NA	NA	NA	2604166667	NA	NA	NA	NA	NA	NA	NA	NA	NA	NA	NA
YachidaS_2019	SAMD00114783	control	50	adult	female	JPN	NA	NA	NA	NA	NA	2034279778	NA	NA	NA	NA	NA	NA	NA	NA	NA	NA	NA
YachidaS_2019	SAMD00114784	control	60	adult	female	JPN	NA	NA	NA	NA	NA	2111090261	NA	NA	NA	NA	NA	NA	NA	NA	NA	NA	NA
YachidaS_2019	SAMD00115008	control	76	senior	male	JPN	NA	NA	NA	NA	NA	237953599	NA	NA	NA	NA	NA	NA	NA	NA	NA	NA	NA
YachidaS_2019	SAMD00114785	control	71	senior	female	JPN	NA	NA	NA	NA	NA	24609375	NA	NA	NA	NA	NA	NA	NA	NA	NA	NA	NA
YachidaS_2019	SAMD00115009	control	76	senior	male	JPN	NA	NA	NA	NA	NA	2588057064	NA	NA	NA	NA	NA	NA	NA	NA	NA	NA	NA
YachidaS_2019	SAMD00115005	control	66	senior	male	JPN	NA	NA	NA	NA	NA	234375	NA	NA	NA	NA	NA	NA	NA	NA	NA	NA	NA
YachidaS_2019	SAMD00115007	CRC	57	adult	female	JPN	NA	NA	NA	NA	NA	2445606342	NA	NA	NA	NA	NA	NA	NA	NA	NA	NA	NA
YachidaS_2019	SAMD00115011	CRC	73	senior	female	JPN	NA	NA	NA	NA	NA	2215102251	NA	NA	NA	NA	NA	NA	NA	NA	NA	NA	NA
YachidaS_2019	SAMD00115012	control	74	senior	male	JPN	NA	NA	NA	NA	NA	1933372992	NA	NA	NA	NA	NA	NA	NA	NA	NA	NA	NA
YachidaS_2019	SAMD00115013	CRC	28	adult	male	JPN	NA	NA	NA	NA	NA	2629757785	NA	NA	NA	NA	NA	NA	NA	NA	NA	NA	NA
YachidaS_2019	SAMD00114816	CRC	70	senior	male	JPN	NA	NA	NA	NA	NA	2104804761	NA	NA	NA	NA	NA	NA	NA	NA	NA	NA	NA
YachidaS_2019	SAMD00114819	control	74	senior	male	JPN	NA	NA	NA	NA	NA	2061925365	NA	NA	NA	NA	NA	NA	NA	NA	NA	NA	NA
YachidaS_2019	SAMD00114804	CRC	73	senior	female	JPN	NA	NA	NA	NA	NA	1956295525	NA	NA	NA	NA	NA	NA	NA	NA	NA	NA	NA
YachidaS_2019	SAMD00114805	CRC	46	adult	male	JPN	NA	NA	NA	NA	NA	1915119182	NA	NA	NA	NA	NA	NA	NA	NA	NA	NA	NA
YachidaS_2019	SAMD00114806	CRC	61	adult	female	JPN	NA	NA	NA	NA	NA	2164127424	NA	NA	NA	NA	NA	NA	NA	NA	NA	NA	NA
YachidaS_2019	SAMD00114807	control	76	senior	female	JPN	NA	NA	NA	NA	NA	1911111111	NA	NA	NA	NA	NA	NA	NA	NA	NA	NA	NA
YachidaS_2019	SAMD00114808	CRC	76	senior	male	JPN	NA	NA	NA	NA	NA	2465303141	NA	NA	NA	NA	NA	NA	NA	NA	NA	NA	NA
YachidaS_2019	SAMD00114809	control	47	adult	female	JPN	NA	NA	NA	NA	NA	2237567995	NA	NA	NA	NA	NA	NA	NA	NA	NA	NA	NA
YachidaS_2019	SAMD00114810	CRC	52	adult	male	JPN	NA	NA	NA	NA	NA	2325501864	NA	NA	NA	NA	NA	NA	NA	NA	NA	NA	NA
YachidaS_2019	SAMD00114811	CRC	69	senior	male	JPN	NA	NA	NA	NA	NA	1614152893	NA	NA	NA	NA	NA	NA	NA	NA	NA	NA	NA
YachidaS_2019	SAMD00114812	control	71	senior	male	JPN	NA	NA	NA	NA	NA	2264737696	NA	NA	NA	NA	NA	NA	NA	NA	NA	NA	NA
YachidaS_2019	SAMD00114813	CRC	70	senior	female	JPN	NA	NA	NA	NA	NA	1734842951	NA	NA	NA	NA	NA	NA	NA	NA	NA	NA	NA
YachidaS_2019	SAMD00114814	CRC	53	adult	male	JPN	NA	NA	NA	NA	NA	2076124567	NA	NA	NA	NA	NA	NA	NA	NA	NA	NA	NA
YachidaS_2019	SAMD00114826	CRC	63	adult	female	JPN	NA	NA	NA	NA	NA	174817898	NA	NA	NA	NA	NA	NA	NA	NA	NA	NA	NA
YachidaS_2019	SAMD00114829	control	65	senior	female	JPN	NA	NA	NA	NA	NA	1981892708	NA	NA	NA	NA	NA	NA	NA	NA	NA	NA	NA
YachidaS_2019	SAMD00114830	control	78	senior	male	JPN	NA	NA	NA	NA	NA	2109375	NA	NA	NA	NA	NA	NA	NA	NA	NA	NA	NA
YachidaS_2019	SAMD00114862	control	78	senior	male	JPN	NA	NA	NA	NA	NA	2286236854	NA	NA	NA	NA	NA	NA	NA	NA	NA	NA	NA
YachidaS_2019	SAMD00114822	CRC	63	adult	male	JPN	NA	NA	NA	NA	NA	2485907356	NA	NA	NA	NA	NA	NA	NA	NA	NA	NA	NA
YachidaS_2019	SAMD00114823	CRC	69	senior	male	JPN	NA	NA	NA	NA	NA	2572755521	NA	NA	NA	NA	NA	NA	NA	NA	NA	NA	NA
YachidaS_2019	SAMD00114857	CRC	65	senior	female	JPN	NA	NA	NA	NA	NA	1799307958	NA	NA	NA	NA	NA	NA	NA	NA	NA	NA	NA
YachidaS_2019	SAMD00114858	control	67	senior	male	JPN	NA	NA	NA	NA	NA	2145357371	NA	NA	NA	NA	NA	NA	NA	NA	NA	NA	NA
YachidaS_2019	SAMD00114824	control	52	adult	male	JPN	NA	NA	NA	NA	NA	2130394858	NA	NA	NA	NA	NA	NA	NA	NA	NA	NA	NA
YachidaS_2019	SAMD00114825	CRC	70	senior	male	JPN	NA	NA	NA	NA	NA	2057613169	NA	NA	NA	NA	NA	NA	NA	NA	NA	NA	NA
YachidaS_2019	SAMD00114817	CRC	59	adult	male	JPN	NA	NA	NA	NA	NA	2484098009	NA	NA	NA	NA	NA	NA	NA	NA	NA	NA	NA
YachidaS_2019	SAMD00114818	control	71	senior	male	JPN	NA	NA	NA	NA	NA	2294213045	NA	NA	NA	NA	NA	NA	NA	NA	NA	NA	NA
YachidaS_2019	SAMD00114835	CRC	50	adult	male	JPN	NA	NA	NA	NA	NA	23.49	NA	NA	NA	NA	NA	NA	NA	NA	NA	NA	NA
YachidaS_2019	SAMD00114836	CRC	68	senior	male	JPN	NA	NA	NA	NA	NA	2387511478	NA	NA	NA	NA	NA	NA	NA	NA	NA	NA	NA
YachidaS_2019	SAMD00114803	CRC	62	adult	male	JPN	NA	NA	NA	NA	NA	2461810377	NA	NA	NA	NA	NA	NA	NA	NA	NA	NA	NA
YachidaS_2019	SAMD00114841	CRC	60	adult	male	JPN	NA	NA	NA	NA	NA	2322543185	NA	NA	NA	NA	NA	NA	NA	NA	NA	NA	NA
YachidaS_2019	SAMD00114842	control	76	senior	female	JPN	NA	NA	NA	NA	NA	2342209073	NA	NA	NA	NA	NA	NA	NA	NA	NA	NA	NA
YachidaS_2019	SAMD00114843	control	53	adult	female	JPN	NA	NA	NA	NA	NA	1866201469	NA	NA	NA	NA	NA	NA	NA	NA	NA	NA	NA
YachidaS_2019	SAMD00114844	CRC	71	senior	female	JPN	NA	NA	NA	NA	NA	3111111111	NA	NA	NA	NA	NA	NA	NA	NA	NA	NA	NA
YachidaS_2019	SAMD00114845	control	55	adult	male	JPN	NA	NA	NA	NA	NA	2681221871	NA	NA	NA	NA	NA	NA	NA	NA	NA	NA	NA
YachidaS_2019	SAMD00114848	CRC	74	senior	female	JPN	NA	NA	NA	NA	NA	25.73	NA	NA	NA	NA	NA	NA	NA	NA	NA	NA	NA
YachidaS_2019	SAMD00114849	CRC	45	adult	female	JPN	NA	NA	NA	NA	NA	2342236836	NA	NA	NA	NA	NA	NA	NA	NA	NA	NA	NA
YachidaS_2019	SAMD00114850	control	41	adult	female	JPN	NA	NA	NA	NA	NA	2032443826	NA	NA	NA	NA	NA	NA	NA	NA	NA	NA	NA
YachidaS_2019	SAMD00114863	CRC	59	adult	female	JPN	NA	NA	NA	NA	NA	2265625	NA	NA	NA	NA	NA	NA	NA	NA	NA	NA	NA
YachidaS_2019	SAMD00114865	control	45	adult	male	JPN	NA	NA	NA	NA	NA	2395122659	NA	NA	NA	NA	NA	NA	NA	NA	NA	NA	NA
YachidaS_2019	SAMD00114867	control	61	adult	female	JPN	NA	NA	NA	NA	NA	2700513097	NA	NA	NA	NA	NA	NA	NA	NA	NA	NA	NA
YachidaS_2019	SAMD00114868	CRC	51	adult	male	JPN	NA	NA	NA	NA	NA	2272440348	NA	NA	NA	NA	NA	NA	NA	NA	NA	NA	NA
YachidaS_2019	SAMD00114869	control	66	senior	female	JPN	NA	NA	NA	NA	NA	3162421994	NA	NA	NA	NA	NA	NA	NA	NA	NA	NA	NA
YachidaS_2019	SAMD00114854	control	78	senior	male	JPN	NA	NA	NA	NA	NA	2215102251	NA	NA	NA	NA	NA	NA	NA	NA	NA	NA	NA
YachidaS_2019	SAMD00114859	control	75	senior	female	JPN	NA	NA	NA	NA	NA	2266666667	NA	NA	NA	NA	NA	NA	NA	NA	NA	NA	NA
YachidaS_2019	SAMD00114837	control	51	adult	male	JPN	NA	NA	NA	NA	NA	2904370899	NA	NA	NA	NA	NA	NA	NA	NA	NA	NA	NA
YachidaS_2019	SAMD00114838	control	54	adult	male	JPN	NA	NA	NA	NA	NA	2371184463	NA	NA	NA	NA	NA	NA	NA	NA	NA	NA	NA
YachidaS_2019	SAMD00114860	control	61	adult	male	JPN	NA	NA	NA	NA	NA	2595155709	NA	NA	NA	NA	NA	NA	NA	NA	NA	NA	NA
YachidaS_2019	SAMD00114839	CRC	65	senior	male	JPN	NA	NA	NA	NA	NA	2505930703	NA	NA	NA	NA	NA	NA	NA	NA	NA	NA	NA
YachidaS_2019	SAMD00114840	CRC	69	senior	male	JPN	NA	NA	NA	NA	NA	2151385851	NA	NA	NA	NA	NA	NA	NA	NA	NA	NA	NA
YachidaS_2019	SAMD00114856	CRC	51	adult	male	JPN	NA	NA	NA	NA	NA	1816620425	NA	NA	NA	NA	NA	NA	NA	NA	NA	NA	NA
YachidaS_2019	SAMD00114870	CRC	75	senior	female	JPN	NA	NA	NA	NA	NA	1897453196	NA	NA	NA	NA	NA	NA	NA	NA	NA	NA	NA
YachidaS_2019	SAMD00114871	CRC	64	adult	male	JPN	NA	NA	NA	NA	NA	2310843458	NA	NA	NA	NA	NA	NA	NA	NA	NA	NA	NA
YachidaS_2019	SAMD00114926	control	73	senior	female	JPN	NA	NA	NA	NA	NA	2069049454	NA	NA	NA	NA	NA	NA	NA	NA	NA	NA	NA
YachidaS_2019	SAMD00114888	control	63	adult	male	JPN	NA	NA	NA	NA	NA	2089795918	NA	NA	NA	NA	NA	NA	NA	NA	NA	NA	NA
YachidaS_2019	SAMD00114889	control	60	adult	male	JPN	NA	NA	NA	NA	NA	2080856124	NA	NA	NA	NA	NA	NA	NA	NA	NA	NA	NA
YachidaS_2019	SAMD00114872	control	62	adult	female	JPN	NA	NA	NA	NA	NA	1819548277	NA	NA	NA	NA	NA	NA	NA	NA	NA	NA	NA
YachidaS_2019	SAMD00114873	control	57	adult	male	JPN	NA	NA	NA	NA	NA	2324380165	NA	NA	NA	NA	NA	NA	NA	NA	NA	NA	NA
YachidaS_2019	SAMD00114927	CRC	73	senior	female	JPN	NA	NA	NA	NA	NA	1831425598	NA	NA	NA	NA	NA	NA	NA	NA	NA	NA	NA
YachidaS_2019	SAMD00114938	control	76	senior	male	JPN	NA	NA	NA	NA	NA	2596952909	NA	NA	NA	NA	NA	NA	NA	NA	NA	NA	NA
YachidaS_2019	SAMD00114891	CRC	77	senior	male	JPN	NA	NA	NA	NA	NA	2333768443	NA	NA	NA	NA	NA	NA	NA	NA	NA	NA	NA
YachidaS_2019	SAMD00114929	control	40	adult	male	JPN	NA	NA	NA	NA	NA	2298190175	NA	NA	NA	NA	NA	NA	NA	NA	NA	NA	NA
YachidaS_2019	SAMD00114939	CRC	64	adult	male	JPN	NA	NA	NA	NA	NA	2267995241	NA	NA	NA	NA	NA	NA	NA	NA	NA	NA	NA
YachidaS_2019	SAMD00114892	CRC	49	adult	female	JPN	NA	NA	NA	NA	NA	1938214469	NA	NA	NA	NA	NA	NA	NA	NA	NA	NA	NA
YachidaS_2019	SAMD00114893	CRC	67	senior	female	JPN	NA	NA	NA	NA	NA	2017455375	NA	NA	NA	NA	NA	NA	NA	NA	NA	NA	NA
YachidaS_2019	SAMD00114874	control	76	senior	male	JPN	NA	NA	NA	NA	NA	2179930796	NA	NA	NA	NA	NA	NA	NA	NA	NA	NA	NA
YachidaS_2019	SAMD00114931	CRC	70	senior	male	JPN	NA	NA	NA	NA	NA	2424242424	NA	NA	NA	NA	NA	NA	NA	NA	NA	NA	NA
YachidaS_2019	SAMD00114932	control	69	senior	male	JPN	NA	NA	NA	NA	NA	2428097534	NA	NA	NA	NA	NA	NA	NA	NA	NA	NA	NA
YachidaS_2019	SAMD00114940	control	76	senior	male	JPN	NA	NA	NA	NA	NA	2079672989	NA	NA	NA	NA	NA	NA	NA	NA	NA	NA	NA
YachidaS_2019	SAMD00114894	CRC	67	senior	female	JPN	NA	NA	NA	NA	NA	2543748081	NA	NA	NA	NA	NA	NA	NA	NA	NA	NA	NA
YachidaS_2019	SAMD00114895	control	49	adult	female	JPN	NA	NA	NA	NA	NA	2230814991	NA	NA	NA	NA	NA	NA	NA	NA	NA	NA	NA
YachidaS_2019	SAMD00114876	control	73	senior	male	JPN	NA	NA	NA	NA	NA	2430248706	NA	NA	NA	NA	NA	NA	NA	NA	NA	NA	NA
YachidaS_2019	SAMD00114933	CRC	64	adult	male	JPN	NA	NA	NA	NA	NA	2044674202	NA	NA	NA	NA	NA	NA	NA	NA	NA	NA	NA
YachidaS_2019	SAMD00114941	CRC	68	senior	male	JPN	NA	NA	NA	NA	NA	2476756592	NA	NA	NA	NA	NA	NA	NA	NA	NA	NA	NA
YachidaS_2019	SAMD00114896	CRC	74	senior	male	JPN	NA	NA	NA	NA	NA	2595155709	NA	NA	NA	NA	NA	NA	NA	NA	NA	NA	NA
YachidaS_2019	SAMD00114897	CRC	69	senior	male	JPN	NA	NA	NA	NA	NA	1936247266	NA	NA	NA	NA	NA	NA	NA	NA	NA	NA	NA
YachidaS_2019	SAMD00114877	CRC	71	senior	male	JPN	NA	NA	NA	NA	NA	2248132907	NA	NA	NA	NA	NA	NA	NA	NA	NA	NA	NA
YachidaS_2019	SAMD00114878	CRC	47	adult	male	JPN	NA	NA	NA	NA	NA	3520104514	NA	NA	NA	NA	NA	NA	NA	NA	NA	NA	NA
YachidaS_2019	SAMD00114934	CRC	55	adult	male	JPN	NA	NA	NA	NA	NA	2617519452	NA	NA	NA	NA	NA	NA	NA	NA	NA	NA	NA
YachidaS_2019	SAMD00114942	control	46	adult	female	JPN	NA	NA	NA	NA	NA	1995935549	NA	NA	NA	NA	NA	NA	NA	NA	NA	NA	NA
YachidaS_2019	SAMD00114898	control	61	adult	female	JPN	NA	NA	NA	NA	NA	1859103675	NA	NA	NA	NA	NA	NA	NA	NA	NA	NA	NA
YachidaS_2019	SAMD00114935	CRC	53	adult	male	JPN	NA	NA	NA	NA	NA	2636560303	NA	NA	NA	NA	NA	NA	NA	NA	NA	NA	NA
YachidaS_2019	SAMD00114908	control	71	senior	male	JPN	NA	NA	NA	NA	NA	2338435374	NA	NA	NA	NA	NA	NA	NA	NA	NA	NA	NA
YachidaS_2019	SAMD00114944	CRC	77	senior	male	JPN	NA	NA	NA	NA	NA	246097337	NA	NA	NA	NA	NA	NA	NA	NA	NA	NA	NA
YachidaS_2019	SAMD00114918	control	42	adult	male	JPN	NA	NA	NA	NA	NA	2617383255	NA	NA	NA	NA	NA	NA	NA	NA	NA	NA	NA
YachidaS_2019	SAMD00114909	CRC	56	adult	female	JPN	NA	NA	NA	NA	NA	2301117686	NA	NA	NA	NA	NA	NA	NA	NA	NA	NA	NA
YachidaS_2019	SAMD00114919	CRC	63	adult	male	JPN	NA	NA	NA	NA	NA	1975308642	NA	NA	NA	NA	NA	NA	NA	NA	NA	NA	NA
YachidaS_2019	SAMD00114920	CRC	59	adult	female	JPN	NA	NA	NA	NA	NA	209566075	NA	NA	NA	NA	NA	NA	NA	NA	NA	NA	NA
YachidaS_2019	SAMD00114949	CRC	60	adult	male	JPN	NA	NA	NA	NA	NA	2342355741	NA	NA	NA	NA	NA	NA	NA	NA	NA	NA	NA
YachidaS_2019	SAMD00114950	control	49	adult	female	JPN	NA	NA	NA	NA	NA	2123057202	NA	NA	NA	NA	NA	NA	NA	NA	NA	NA	NA
YachidaS_2019	SAMD00114910	CRC	69	senior	male	JPN	NA	NA	NA	NA	NA	2283950617	NA	NA	NA	NA	NA	NA	NA	NA	NA	NA	NA
YachidaS_2019	SAMD00114911	CRC	52	adult	male	JPN	NA	NA	NA	NA	NA	2366524436	NA	NA	NA	NA	NA	NA	NA	NA	NA	NA	NA
YachidaS_2019	SAMD00114921	CRC	39	adult	male	JPN	NA	NA	NA	NA	NA	1937919743	NA	NA	NA	NA	NA	NA	NA	NA	NA	NA	NA
YachidaS_2019	SAMD00114951	CRC	73	senior	male	JPN	NA	NA	NA	NA	NA	2330668005	NA	NA	NA	NA	NA	NA	NA	NA	NA	NA	NA
YachidaS_2019	SAMD00114912	CRC	78	senior	male	JPN	NA	NA	NA	NA	NA	2590945695	NA	NA	NA	NA	NA	NA	NA	NA	NA	NA	NA
YachidaS_2019	SAMD00114913	control	69	senior	male	JPN	NA	NA	NA	NA	NA	2214532872	NA	NA	NA	NA	NA	NA	NA	NA	NA	NA	NA
YachidaS_2019	SAMD00114952	CRC	60	adult	male	JPN	NA	NA	NA	NA	NA	2129529475	NA	NA	NA	NA	NA	NA	NA	NA	NA	NA	NA
YachidaS_2019	SAMD00114953	control	63	adult	male	JPN	NA	NA	NA	NA	NA	2205805119	NA	NA	NA	NA	NA	NA	NA	NA	NA	NA	NA
YachidaS_2019	SAMD00114945	control	70	senior	male	JPN	NA	NA	NA	NA	NA	2422145329	NA	NA	NA	NA	NA	NA	NA	NA	NA	NA	NA
YachidaS_2019	SAMD00114924	CRC	69	senior	female	JPN	NA	NA	NA	NA	NA	1977769867	NA	NA	NA	NA	NA	NA	NA	NA	NA	NA	NA
YachidaS_2019	SAMD00114954	CRC	62	adult	male	JPN	NA	NA	NA	NA	NA	2559373706	NA	NA	NA	NA	NA	NA	NA	NA	NA	NA	NA
YachidaS_2019	SAMD00114946	CRC	46	adult	female	JPN	NA	NA	NA	NA	NA	1744492677	NA	NA	NA	NA	NA	NA	NA	NA	NA	NA	NA
YachidaS_2019	SAMD00114956	CRC	59	adult	female	JPN	NA	NA	NA	NA	NA	20504934	NA	NA	NA	NA	NA	NA	NA	NA	NA	NA	NA
YachidaS_2019	SAMD00114915	CRC	54	adult	female	JPN	NA	NA	NA	NA	NA	2056880661	NA	NA	NA	NA	NA	NA	NA	NA	NA	NA	NA
YachidaS_2019	SAMD00114916	CRC	63	adult	female	JPN	NA	NA	NA	NA	NA	1981784449	NA	NA	NA	NA	NA	NA	NA	NA	NA	NA	NA
YachidaS_2019	SAMD00114917	CRC	49	adult	male	JPN	NA	NA	NA	NA	NA	3755102041	NA	NA	NA	NA	NA	NA	NA	NA	NA	NA	NA
YachidaS_2019	SAMD00114948	CRC	72	senior	male	JPN	NA	NA	NA	NA	NA	2469040546	NA	NA	NA	NA	NA	NA	NA	NA	NA	NA	NA
YachidaS_2019	SAMD00114957	CRC	59	adult	male	JPN	NA	NA	NA	NA	NA	2505930703	NA	NA	NA	NA	NA	NA	NA	NA	NA	NA	NA
YachidaS_2019	SAMD00114958	CRC	61	adult	female	JPN	NA	NA	NA	NA	NA	2361275089	NA	NA	NA	NA	NA	NA	NA	NA	NA	NA	NA
YachidaS_2019	SAMD00114879	CRC	66	senior	male	JPN	NA	NA	NA	NA	NA	1871094925	NA	NA	NA	NA	NA	NA	NA	NA	NA	NA	NA
YachidaS_2019	SAMD00114880	control	42	adult	female	JPN	NA	NA	NA	NA	NA	2559373706	NA	NA	NA	NA	NA	NA	NA	NA	NA	NA	NA
YachidaS_2019	SAMD00114959	control	49	adult	male	JPN	NA	NA	NA	NA	NA	2739817568	NA	NA	NA	NA	NA	NA	NA	NA	NA	NA	NA
YachidaS_2019	SAMD00114899	control	54	adult	female	JPN	NA	NA	NA	NA	NA	2218934911	NA	NA	NA	NA	NA	NA	NA	NA	NA	NA	NA
YachidaS_2019	SAMD00114881	control	68	senior	female	JPN	NA	NA	NA	NA	NA	1950059453	NA	NA	NA	NA	NA	NA	NA	NA	NA	NA	NA
YachidaS_2019	SAMD00114882	control	74	senior	female	JPN	NA	NA	NA	NA	NA	2434960912	NA	NA	NA	NA	NA	NA	NA	NA	NA	NA	NA
YachidaS_2019	SAMD00114900	control	54	adult	female	JPN	NA	NA	NA	NA	NA	196282647	NA	NA	NA	NA	NA	NA	NA	NA	NA	NA	NA
YachidaS_2019	SAMD00114901	control	74	senior	female	JPN	NA	NA	NA	NA	NA	20.83	NA	NA	NA	NA	NA	NA	NA	NA	NA	NA	NA
YachidaS_2019	SAMD00114883	CRC	64	adult	male	JPN	NA	NA	NA	NA	NA	2383673469	NA	NA	NA	NA	NA	NA	NA	NA	NA	NA	NA
YachidaS_2019	SAMD00114884	CRC	32	adult	female	JPN	NA	NA	NA	NA	NA	2234778209	NA	NA	NA	NA	NA	NA	NA	NA	NA	NA	NA
YachidaS_2019	SAMD00114903	CRC	70	senior	female	JPN	NA	NA	NA	NA	NA	2306805075	NA	NA	NA	NA	NA	NA	NA	NA	NA	NA	NA
YachidaS_2019	SAMD00114963	control	65	senior	female	JPN	NA	NA	NA	NA	NA	2432322868	NA	NA	NA	NA	NA	NA	NA	NA	NA	NA	NA
YachidaS_2019	SAMD00114964	CRC	75	senior	female	JPN	NA	NA	NA	NA	NA	2222222222	NA	NA	NA	NA	NA	NA	NA	NA	NA	NA	NA
YachidaS_2019	SAMD00114905	CRC	73	senior	male	JPN	NA	NA	NA	NA	NA	2291303307	NA	NA	NA	NA	NA	NA	NA	NA	NA	NA	NA
YachidaS_2019	SAMD00114965	CRC	52	adult	male	JPN	NA	NA	NA	NA	NA	2642356982	NA	NA	NA	NA	NA	NA	NA	NA	NA	NA	NA
YachidaS_2019	SAMD00114885	control	74	senior	male	JPN	NA	NA	NA	NA	NA	20703125	NA	NA	NA	NA	NA	NA	NA	NA	NA	NA	NA
YachidaS_2019	SAMD00114906	control	75	senior	female	JPN	NA	NA	NA	NA	NA	2117021756	NA	NA	NA	NA	NA	NA	NA	NA	NA	NA	NA
YachidaS_2019	SAMD00114907	CRC	58	adult	male	JPN	NA	NA	NA	NA	NA	19605192	NA	NA	NA	NA	NA	NA	NA	NA	NA	NA	NA
YachidaS_2019	SAMD00114966	CRC	73	senior	female	JPN	NA	NA	NA	NA	NA	2054569362	NA	NA	NA	NA	NA	NA	NA	NA	NA	NA	NA
YachidaS_2019	SAMD00114967	control	51	adult	male	JPN	NA	NA	NA	NA	NA	2838480216	NA	NA	NA	NA	NA	NA	NA	NA	NA	NA	NA
YachidaS_2019	SAMD00164694	CRC	69	senior	female	JPN	NA	NA	NA	NA	NA	2.25069e+16	NA	NA	NA	NA	NA	NA	NA	NA	NA	NA	NA
YachidaS_2019	SAMD00164695	CRC	58	adult	male	JPN	NA	NA	NA	NA	NA	2.40238e+16	NA	NA	NA	NA	NA	NA	NA	NA	NA	NA	NA
YachidaS_2019	SAMD00136653	control	68	senior	female	JPN	NA	NA	NA	NA	NA	188588219815	NA	NA	NA	NA	NA	NA	NA	NA	NA	NA	NA
YachidaS_2019	SAMD00164721	CRC	64	adult	female	JPN	NA	NA	NA	NA	NA	1.8026e+16	NA	NA	NA	NA	NA	NA	NA	NA	NA	NA	NA
YachidaS_2019	SAMD00164727	control	44	adult	male	JPN	NA	NA	NA	NA	NA	241632653061	NA	NA	NA	NA	NA	NA	NA	NA	NA	NA	NA
YachidaS_2019	SAMD00164729	control	76	senior	male	JPN	NA	NA	NA	NA	NA	2.28625e+16	NA	NA	NA	NA	NA	NA	NA	NA	NA	NA	NA
YachidaS_2019	SAMD00164745	CRC	58	adult	male	JPN	NA	NA	NA	NA	NA	280557057869	NA	NA	NA	NA	NA	NA	NA	NA	NA	NA	NA
YachidaS_2019	SAMD00164748	control	68	senior	female	JPN	NA	NA	NA	NA	NA	243232286834	NA	NA	NA	NA	NA	NA	NA	NA	NA	NA	NA
YachidaS_2019	SAMD00154991	control	65	senior	male	JPN	NA	NA	NA	NA	NA	2.15645e+16	NA	NA	NA	NA	NA	NA	NA	NA	NA	NA	NA
YachidaS_2019	SAMD00164756	control	67	senior	female	JPN	NA	NA	NA	NA	NA	219075824577	NA	NA	NA	NA	NA	NA	NA	NA	NA	NA	NA
YachidaS_2019	SAMD00164758	control	78	senior	female	JPN	NA	NA	NA	NA	NA	206904945434	NA	NA	NA	NA	NA	NA	NA	NA	NA	NA	NA
YachidaS_2019	SAMD00154992	control	66	senior	female	JPN	NA	NA	NA	NA	NA	2.23478e+16	NA	NA	NA	NA	NA	NA	NA	NA	NA	NA	NA
YachidaS_2019	SAMD00154993	CRC	48	adult	male	JPN	NA	NA	NA	NA	NA	230300453515	NA	NA	NA	NA	NA	NA	NA	NA	NA	NA	NA
YachidaS_2019	SAMD00136648	control	56	adult	male	JPN	NA	NA	NA	NA	NA	268544055741	NA	NA	NA	NA	NA	NA	NA	NA	NA	NA	NA
YachidaS_2019	SAMD00154994	CRC	65	senior	male	JPN	NA	NA	NA	NA	NA	213839419961	NA	NA	NA	NA	NA	NA	NA	NA	NA	NA	NA
YachidaS_2019	SAMD00154995	CRC	70	senior	male	JPN	NA	NA	NA	NA	NA	1.89619e+16	NA	NA	NA	NA	NA	NA	NA	NA	NA	NA	NA
YachidaS_2019	SAMD00164773	control	67	senior	male	JPN	NA	NA	NA	NA	NA	250995015956	NA	NA	NA	NA	NA	NA	NA	NA	NA	NA	NA
YachidaS_2019	SAMD00164774	control	62	adult	female	JPN	NA	NA	NA	NA	NA	251531502292	NA	NA	NA	NA	NA	NA	NA	NA	NA	NA	NA
YachidaS_2019	SAMD00164776	CRC	66	senior	male	JPN	NA	NA	NA	NA	NA	2.05457e+16	NA	NA	NA	NA	NA	NA	NA	NA	NA	NA	NA
YachidaS_2019	SAMD00164780	CRC	48	adult	female	JPN	NA	NA	NA	NA	NA	2.28928e+16	NA	NA	NA	NA	NA	NA	NA	NA	NA	NA	NA
YachidaS_2019	SAMD00164803	control	74	senior	male	JPN	NA	NA	NA	NA	NA	2.25896e+16	NA	NA	NA	NA	NA	NA	NA	NA	NA	NA	NA
YachidaS_2019	SAMD00164805	control	70	senior	female	JPN	NA	NA	NA	NA	NA	253333333333	NA	NA	NA	NA	NA	NA	NA	NA	NA	NA	NA
YachidaS_2019	SAMD00164806	control	77	senior	male	JPN	NA	NA	NA	NA	NA	20438165585	NA	NA	NA	NA	NA	NA	NA	NA	NA	NA	NA
YachidaS_2019	SAMD00164809	control	60	adult	male	JPN	NA	NA	NA	NA	NA	194869614512	NA	NA	NA	NA	NA	NA	NA	NA	NA	NA	NA
YachidaS_2019	SAMD00164812	CRC	62	adult	female	JPN	NA	NA	NA	NA	NA	29296875	NA	NA	NA	NA	NA	NA	NA	NA	NA	NA	NA
YachidaS_2019	SAMD00164814	control	55	adult	male	JPN	NA	NA	NA	NA	NA	240929705215	NA	NA	NA	NA	NA	NA	NA	NA	NA	NA	NA
YachidaS_2019	SAMD00164819	control	69	senior	male	JPN	NA	NA	NA	NA	NA	224081789853	NA	NA	NA	NA	NA	NA	NA	NA	NA	NA	NA
YachidaS_2019	SAMD00164821	CRC	46	adult	male	JPN	NA	NA	NA	NA	NA	228571428571	NA	NA	NA	NA	NA	NA	NA	NA	NA	NA	NA
YachidaS_2019	SAMD00164823	control	54	adult	female	JPN	NA	NA	NA	NA	NA	207756232687	NA	NA	NA	NA	NA	NA	NA	NA	NA	NA	NA
YachidaS_2019	SAMD00164824	control	68	senior	female	JPN	NA	NA	NA	NA	NA	186620146862	NA	NA	NA	NA	NA	NA	NA	NA	NA	NA	NA
YachidaS_2019	SAMD00164825	control	37	adult	male	JPN	NA	NA	NA	NA	NA	2.50135e+16	NA	NA	NA	NA	NA	NA	NA	NA	NA	NA	NA
YachidaS_2019	SAMD00164827	control	46	adult	male	JPN	NA	NA	NA	NA	NA	224712087638	NA	NA	NA	NA	NA	NA	NA	NA	NA	NA	NA
YachidaS_2019	SAMD00164828	control	46	adult	female	JPN	NA	NA	NA	NA	NA	23046875	NA	NA	NA	NA	NA	NA	NA	NA	NA	NA	NA
YachidaS_2019	SAMD00164829	CRC	67	senior	male	JPN	NA	NA	NA	NA	NA	246755002704	NA	NA	NA	NA	NA	NA	NA	NA	NA	NA	NA
YachidaS_2019	SAMD00164832	CRC	55	adult	male	JPN	NA	NA	NA	NA	NA	2.53515e+16	NA	NA	NA	NA	NA	NA	NA	NA	NA	NA	NA
YachidaS_2019	SAMD00164833	control	58	adult	male	JPN	NA	NA	NA	NA	NA	2.03037e+16	NA	NA	NA	NA	NA	NA	NA	NA	NA	NA	NA
YachidaS_2019	SAMD00164835	control	43	adult	female	JPN	NA	NA	NA	NA	NA	16796875	NA	NA	NA	NA	NA	NA	NA	NA	NA	NA	NA
YachidaS_2019	SAMD00164837	control	52	adult	male	JPN	NA	NA	NA	NA	NA	2.50135e+16	NA	NA	NA	NA	NA	NA	NA	NA	NA	NA	NA
YachidaS_2019	SAMD00164840	control	58	adult	female	JPN	NA	NA	NA	NA	NA	185528756957	NA	NA	NA	NA	NA	NA	NA	NA	NA	NA	NA
YachidaS_2019	SAMD00164844	CRC	75	senior	male	JPN	NA	NA	NA	NA	NA	2.28625e+16	NA	NA	NA	NA	NA	NA	NA	NA	NA	NA	NA
YachidaS_2019	SAMD00164847	CRC	58	adult	female	JPN	NA	NA	NA	NA	NA	171875	NA	NA	NA	NA	NA	NA	NA	NA	NA	NA	NA
YachidaS_2019	SAMD00164848	control	66	senior	male	JPN	NA	NA	NA	NA	NA	2.48016e+16	NA	NA	NA	NA	NA	NA	NA	NA	NA	NA	NA
YachidaS_2019	SAMD00164849	control	73	senior	female	JPN	NA	NA	NA	NA	NA	216041047799	NA	NA	NA	NA	NA	NA	NA	NA	NA	NA	NA
YachidaS_2019	SAMD00164850	CRC	48	adult	male	JPN	NA	NA	NA	NA	NA	256489176157	NA	NA	NA	NA	NA	NA	NA	NA	NA	NA	NA
YachidaS_2019	SAMD00164851	CRC	73	senior	male	JPN	NA	NA	NA	NA	NA	238751147842	NA	NA	NA	NA	NA	NA	NA	NA	NA	NA	NA
YachidaS_2019	SAMD00164853	control	61	adult	female	JPN	NA	NA	NA	NA	NA	210771952275	NA	NA	NA	NA	NA	NA	NA	NA	NA	NA	NA
YachidaS_2019	SAMD00164854	CRC	75	senior	male	JPN	NA	NA	NA	NA	NA	209566074951	NA	NA	NA	NA	NA	NA	NA	NA	NA	NA	NA
YachidaS_2019	SAMD00164855	control	71	senior	female	JPN	NA	NA	NA	NA	NA	173484295106	NA	NA	NA	NA	NA	NA	NA	NA	NA	NA	NA
YachidaS_2019	SAMD00164856	control	48	adult	male	JPN	NA	NA	NA	NA	NA	2.16721e+16	NA	NA	NA	NA	NA	NA	NA	NA	NA	NA	NA
YachidaS_2019	SAMD00164858	CRC	72	senior	male	JPN	NA	NA	NA	NA	NA	199432125473	NA	NA	NA	NA	NA	NA	NA	NA	NA	NA	NA
YachidaS_2019	SAMD00164859	CRC	63	adult	male	JPN	NA	NA	NA	NA	NA	23507805326	NA	NA	NA	NA	NA	NA	NA	NA	NA	NA	NA
YachidaS_2019	SAMD00164860	CRC	79	senior	female	JPN	NA	NA	NA	NA	NA	176692965155	NA	NA	NA	NA	NA	NA	NA	NA	NA	NA	NA
YachidaS_2019	SAMD00164861	CRC	44	adult	male	JPN	NA	NA	NA	NA	NA	289978938372	NA	NA	NA	NA	NA	NA	NA	NA	NA	NA	NA
YachidaS_2019	SAMD00164862	control	44	adult	male	JPN	NA	NA	NA	NA	NA	238367346939	NA	NA	NA	NA	NA	NA	NA	NA	NA	NA	NA
YachidaS_2019	SAMD00164865	control	77	senior	male	JPN	NA	NA	NA	NA	NA	2.05714e+16	NA	NA	NA	NA	NA	NA	NA	NA	NA	NA	NA
YachidaS_2019	SAMD00164866	CRC	67	senior	male	JPN	NA	NA	NA	NA	NA	213333333333	NA	NA	NA	NA	NA	NA	NA	NA	NA	NA	NA
YachidaS_2019	SAMD00164867	CRC	62	adult	male	JPN	NA	NA	NA	NA	NA	1.98347e+16	NA	NA	NA	NA	NA	NA	NA	NA	NA	NA	NA
YachidaS_2019	SAMD00164868	CRC	66	senior	female	JPN	NA	NA	NA	NA	NA	212305720237	NA	NA	NA	NA	NA	NA	NA	NA	NA	NA	NA
YachidaS_2019	SAMD00164870	control	63	adult	female	JPN	NA	NA	NA	NA	NA	275482093664	NA	NA	NA	NA	NA	NA	NA	NA	NA	NA	NA
YachidaS_2019	SAMD00164871	CRC	62	adult	male	JPN	NA	NA	NA	NA	NA	2109375	NA	NA	NA	NA	NA	NA	NA	NA	NA	NA	NA
YachidaS_2019	SAMD00164872	control	55	adult	male	JPN	NA	NA	NA	NA	NA	2.33887e+16	NA	NA	NA	NA	NA	NA	NA	NA	NA	NA	NA
YachidaS_2019	SAMD00164873	control	32	adult	male	JPN	NA	NA	NA	NA	NA	187327823691	NA	NA	NA	NA	NA	NA	NA	NA	NA	NA	NA
YachidaS_2019	SAMD00164874	control	77	senior	male	JPN	NA	NA	NA	NA	NA	20438165585	NA	NA	NA	NA	NA	NA	NA	NA	NA	NA	NA
YachidaS_2019	SAMD00164875	control	34	adult	male	JPN	NA	NA	NA	NA	NA	2.18573e+16	NA	NA	NA	NA	NA	NA	NA	NA	NA	NA	NA
YachidaS_2019	SAMD00164876	control	37	adult	male	JPN	NA	NA	NA	NA	NA	253443526171	NA	NA	NA	NA	NA	NA	NA	NA	NA	NA	NA
YachidaS_2019	SAMD00164877	control	68	senior	female	JPN	NA	NA	NA	NA	NA	192233756248	NA	NA	NA	NA	NA	NA	NA	NA	NA	NA	NA
YachidaS_2019	SAMD00164878	control	51	adult	male	JPN	NA	NA	NA	NA	NA	191570881226	NA	NA	NA	NA	NA	NA	NA	NA	NA	NA	NA
YachidaS_2019	SAMD00164879	control	63	adult	male	JPN	NA	NA	NA	NA	NA	21107266436	NA	NA	NA	NA	NA	NA	NA	NA	NA	NA	NA
YachidaS_2019	SAMD00164881	control	51	adult	female	JPN	NA	NA	NA	NA	NA	194330132602	NA	NA	NA	NA	NA	NA	NA	NA	NA	NA	NA
YachidaS_2019	SAMD00164882	control	72	senior	male	JPN	NA	NA	NA	NA	NA	230545624645	NA	NA	NA	NA	NA	NA	NA	NA	NA	NA	NA
YachidaS_2019	SAMD00164884	CRC	73	senior	male	JPN	NA	NA	NA	NA	NA	2.12031e+16	NA	NA	NA	NA	NA	NA	NA	NA	NA	NA	NA
YachidaS_2019	SAMD00164886	control	40	adult	male	JPN	NA	NA	NA	NA	NA	273796646836	NA	NA	NA	NA	NA	NA	NA	NA	NA	NA	NA
YachidaS_2019	SAMD00164888	control	47	adult	male	JPN	NA	NA	NA	NA	NA	261751945211	NA	NA	NA	NA	NA	NA	NA	NA	NA	NA	NA
YachidaS_2019	SAMD00164890	control	57	adult	male	JPN	NA	NA	NA	NA	NA	2.62596e+16	NA	NA	NA	NA	NA	NA	NA	NA	NA	NA	NA
YachidaS_2019	SAMD00164891	control	54	adult	male	JPN	NA	NA	NA	NA	NA	2.35294e+16	NA	NA	NA	NA	NA	NA	NA	NA	NA	NA	NA
YachidaS_2019	SAMD00164892	control	63	adult	male	JPN	NA	NA	NA	NA	NA	244418020875	NA	NA	NA	NA	NA	NA	NA	NA	NA	NA	NA
YachidaS_2019	SAMD00164895	control	44	adult	female	JPN	NA	NA	NA	NA	NA	216311488544	NA	NA	NA	NA	NA	NA	NA	NA	NA	NA	NA
YachidaS_2019	SAMD00164896	control	55	adult	male	JPN	NA	NA	NA	NA	NA	245089457652	NA	NA	NA	NA	NA	NA	NA	NA	NA	NA	NA
YachidaS_2019	SAMD00164897	control	55	adult	male	JPN	NA	NA	NA	NA	NA	2.12585e+16	NA	NA	NA	NA	NA	NA	NA	NA	NA	NA	NA
YachidaS_2019	SAMD00164898	control	79	senior	female	JPN	NA	NA	NA	NA	NA	24609375	NA	NA	NA	NA	NA	NA	NA	NA	NA	NA	NA
YachidaS_2019	SAMD00164899	control	38	adult	male	JPN	NA	NA	NA	NA	NA	224996371026	NA	NA	NA	NA	NA	NA	NA	NA	NA	NA	NA
YachidaS_2019	SAMD00164901	control	54	adult	female	JPN	NA	NA	NA	NA	NA	2.02395e+16	NA	NA	NA	NA	NA	NA	NA	NA	NA	NA	NA
YachidaS_2019	SAMD00164902	control	61	adult	male	JPN	NA	NA	NA	NA	NA	264235698243	NA	NA	NA	NA	NA	NA	NA	NA	NA	NA	NA
YachidaS_2019	SAMD00164904	control	55	adult	male	JPN	NA	NA	NA	NA	NA	2291303307	NA	NA	NA	NA	NA	NA	NA	NA	NA	NA	NA
YachidaS_2019	SAMD00164907	CRC	51	adult	male	JPN	NA	NA	NA	NA	NA	266435986159	NA	NA	NA	NA	NA	NA	NA	NA	NA	NA	NA
YachidaS_2019	SAMD00164908	control	58	adult	female	JPN	NA	NA	NA	NA	NA	179088553574	NA	NA	NA	NA	NA	NA	NA	NA	NA	NA	NA
YachidaS_2019	SAMD00164909	control	74	senior	male	JPN	NA	NA	NA	NA	NA	24609375	NA	NA	NA	NA	NA	NA	NA	NA	NA	NA	NA
YachidaS_2019	SAMD00164911	control	64	adult	female	JPN	NA	NA	NA	NA	NA	1.64237e+16	NA	NA	NA	NA	NA	NA	NA	NA	NA	NA	NA
YachidaS_2019	SAMD00164914	control	40	adult	female	JPN	NA	NA	NA	NA	NA	176308539945	NA	NA	NA	NA	NA	NA	NA	NA	NA	NA	NA
YachidaS_2019	SAMD00164915	control	46	adult	female	JPN	NA	NA	NA	NA	NA	203125	NA	NA	NA	NA	NA	NA	NA	NA	NA	NA	NA
YachidaS_2019	SAMD00164916	control	72	senior	male	JPN	NA	NA	NA	NA	NA	229481157446	NA	NA	NA	NA	NA	NA	NA	NA	NA	NA	NA
YachidaS_2019	SAMD00164917	control	62	adult	female	JPN	NA	NA	NA	NA	NA	219261258222	NA	NA	NA	NA	NA	NA	NA	NA	NA	NA	NA
YachidaS_2019	SAMD00164918	control	47	adult	male	JPN	NA	NA	NA	NA	NA	214532871972	NA	NA	NA	NA	NA	NA	NA	NA	NA	NA	NA
YachidaS_2019	SAMD00164920	control	47	adult	female	JPN	NA	NA	NA	NA	NA	184425458241	NA	NA	NA	NA	NA	NA	NA	NA	NA	NA	NA
YachidaS_2019	SAMD00164923	control	67	senior	female	JPN	NA	NA	NA	NA	NA	239360623149	NA	NA	NA	NA	NA	NA	NA	NA	NA	NA	NA
YachidaS_2019	SAMD00164926	control	56	adult	male	JPN	NA	NA	NA	NA	NA	238367346939	NA	NA	NA	NA	NA	NA	NA	NA	NA	NA	NA
YachidaS_2019	SAMD00164927	control	72	senior	male	JPN	NA	NA	NA	NA	NA	217192501143	NA	NA	NA	NA	NA	NA	NA	NA	NA	NA	NA
YachidaS_2019	SAMD00164928	CRC	73	senior	female	JPN	NA	NA	NA	NA	NA	2.10517e+16	NA	NA	NA	NA	NA	NA	NA	NA	NA	NA	NA
YachidaS_2019	SAMD00164929	control	54	adult	male	JPN	NA	NA	NA	NA	NA	2.73356e+16	NA	NA	NA	NA	NA	NA	NA	NA	NA	NA	NA
YachidaS_2019	SAMD00164930	control	63	adult	female	JPN	NA	NA	NA	NA	NA	191467221644	NA	NA	NA	NA	NA	NA	NA	NA	NA	NA	NA
YachidaS_2019	SAMD00164931	control	75	senior	male	JPN	NA	NA	NA	NA	NA	201347797502	NA	NA	NA	NA	NA	NA	NA	NA	NA	NA	NA
YachidaS_2019	SAMD00164932	CRC	68	senior	female	JPN	NA	NA	NA	NA	NA	256837098692	NA	NA	NA	NA	NA	NA	NA	NA	NA	NA	NA
YachidaS_2019	SAMD00164933	control	66	senior	female	JPN	NA	NA	NA	NA	NA	230300453515	NA	NA	NA	NA	NA	NA	NA	NA	NA	NA	NA
YachidaS_2019	SAMD00164934	control	62	adult	female	JPN	NA	NA	NA	NA	NA	2.02395e+16	NA	NA	NA	NA	NA	NA	NA	NA	NA	NA	NA
YachidaS_2019	SAMD00164935	control	66	senior	female	JPN	NA	NA	NA	NA	NA	237252861602	NA	NA	NA	NA	NA	NA	NA	NA	NA	NA	NA
YachidaS_2019	SAMD00164936	control	55	adult	male	JPN	NA	NA	NA	NA	NA	235666322314	NA	NA	NA	NA	NA	NA	NA	NA	NA	NA	NA
YachidaS_2019	SAMD00164937	CRC	64	adult	male	JPN	NA	NA	NA	NA	NA	2.44898e+16	NA	NA	NA	NA	NA	NA	NA	NA	NA	NA	NA
YachidaS_2019	SAMD00164938	control	69	senior	female	JPN	NA	NA	NA	NA	NA	235303663435	NA	NA	NA	NA	NA	NA	NA	NA	NA	NA	NA
YachidaS_2019	SAMD00164939	control	71	senior	female	JPN	NA	NA	NA	NA	NA	266349583829	NA	NA	NA	NA	NA	NA	NA	NA	NA	NA	NA
YachidaS_2019	SAMD00164941	control	68	senior	female	JPN	NA	NA	NA	NA	NA	211927424152	NA	NA	NA	NA	NA	NA	NA	NA	NA	NA	NA
YachidaS_2019	SAMD00164944	CRC	64	adult	male	JPN	NA	NA	NA	NA	NA	2.25896e+16	NA	NA	NA	NA	NA	NA	NA	NA	NA	NA	NA
YachidaS_2019	SAMD00164946	CRC	69	senior	female	JPN	NA	NA	NA	NA	NA	181786703601	NA	NA	NA	NA	NA	NA	NA	NA	NA	NA	NA
YachidaS_2019	SAMD00164947	control	37	adult	male	JPN	NA	NA	NA	NA	NA	1.92672e+16	NA	NA	NA	NA	NA	NA	NA	NA	NA	NA	NA
YachidaS_2019	SAMD00164949	control	49	adult	female	JPN	NA	NA	NA	NA	NA	197238658777	NA	NA	NA	NA	NA	NA	NA	NA	NA	NA	NA
YachidaS_2019	SAMD00164950	control	31	adult	male	JPN	NA	NA	NA	NA	NA	3.93283e+16	NA	NA	NA	NA	NA	NA	NA	NA	NA	NA	NA
YachidaS_2019	SAMD00164951	control	52	adult	female	JPN	NA	NA	NA	NA	NA	225827091723	NA	NA	NA	NA	NA	NA	NA	NA	NA	NA	NA
YachidaS_2019	SAMD00164952	control	35	adult	female	JPN	NA	NA	NA	NA	NA	221893491124	NA	NA	NA	NA	NA	NA	NA	NA	NA	NA	NA
YachidaS_2019	SAMD00164953	control	57	adult	male	JPN	NA	NA	NA	NA	NA	3.01162e+16	NA	NA	NA	NA	NA	NA	NA	NA	NA	NA	NA
YachidaS_2019	SAMD00164954	control	21	adult	female	JPN	NA	NA	NA	NA	NA	178980228928	NA	NA	NA	NA	NA	NA	NA	NA	NA	NA	NA
YachidaS_2019	SAMD00164955	control	70	senior	female	JPN	NA	NA	NA	NA	NA	299643281807	NA	NA	NA	NA	NA	NA	NA	NA	NA	NA	NA
YachidaS_2019	SAMD00164956	control	50	adult	male	JPN	NA	NA	NA	NA	NA	214619366242	NA	NA	NA	NA	NA	NA	NA	NA	NA	NA	NA
YachidaS_2019	SAMD00164957	control	57	adult	female	JPN	NA	NA	NA	NA	NA	21484375	NA	NA	NA	NA	NA	NA	NA	NA	NA	NA	NA
YachidaS_2019	SAMD00164958	control	52	adult	male	JPN	NA	NA	NA	NA	NA	2.76361e+16	NA	NA	NA	NA	NA	NA	NA	NA	NA	NA	NA
YachidaS_2019	SAMD00164960	control	51	adult	female	JPN	NA	NA	NA	NA	NA	219075824577	NA	NA	NA	NA	NA	NA	NA	NA	NA	NA	NA
YachidaS_2019	SAMD00164961	control	61	adult	female	JPN	NA	NA	NA	NA	NA	170874449998	NA	NA	NA	NA	NA	NA	NA	NA	NA	NA	NA
YachidaS_2019	SAMD00164962	control	63	adult	female	JPN	NA	NA	NA	NA	NA	178980228928	NA	NA	NA	NA	NA	NA	NA	NA	NA	NA	NA
YachidaS_2019	SAMD00164963	control	40	adult	male	JPN	NA	NA	NA	NA	NA	227731864096	NA	NA	NA	NA	NA	NA	NA	NA	NA	NA	NA
YachidaS_2019	SAMD00164964	control	70	senior	male	JPN	NA	NA	NA	NA	NA	1796875	NA	NA	NA	NA	NA	NA	NA	NA	NA	NA	NA
YachidaS_2019	SAMD00164965	control	27	adult	male	JPN	NA	NA	NA	NA	NA	249680097375	NA	NA	NA	NA	NA	NA	NA	NA	NA	NA	NA
YachidaS_2019	SAMD00164966	control	34	adult	male	JPN	NA	NA	NA	NA	NA	219281071345	NA	NA	NA	NA	NA	NA	NA	NA	NA	NA	NA
YachidaS_2019	SAMD00164967	control	75	senior	female	JPN	NA	NA	NA	NA	NA	3.02112e+16	NA	NA	NA	NA	NA	NA	NA	NA	NA	NA	NA
YachidaS_2019	SAMD00164968	CRC	75	senior	male	JPN	NA	NA	NA	NA	NA	213039485767	NA	NA	NA	NA	NA	NA	NA	NA	NA	NA	NA
YachidaS_2019	SAMD00164969	control	37	adult	male	JPN	NA	NA	NA	NA	NA	221297397278	NA	NA	NA	NA	NA	NA	NA	NA	NA	NA	NA
YachidaS_2019	SAMD00164971	CRC	49	adult	female	JPN	NA	NA	NA	NA	NA	192893792678	NA	NA	NA	NA	NA	NA	NA	NA	NA	NA	NA
YachidaS_2019	SAMD00164972	control	52	adult	female	JPN	NA	NA	NA	NA	NA	179088553574	NA	NA	NA	NA	NA	NA	NA	NA	NA	NA	NA
YachidaS_2019	SAMD00164973	control	55	adult	female	JPN	NA	NA	NA	NA	NA	210828132906	NA	NA	NA	NA	NA	NA	NA	NA	NA	NA	NA
YachidaS_2019	SAMD00164974	CRC	71	senior	female	JPN	NA	NA	NA	NA	NA	2.19289e+16	NA	NA	NA	NA	NA	NA	NA	NA	NA	NA	NA
YachidaS_2019	SAMD00164975	CRC	48	adult	female	JPN	NA	NA	NA	NA	NA	295159386068	NA	NA	NA	NA	NA	NA	NA	NA	NA	NA	NA
YachidaS_2019	SAMD00164976	CRC	43	adult	male	JPN	NA	NA	NA	NA	NA	216333153056	NA	NA	NA	NA	NA	NA	NA	NA	NA	NA	NA
YachidaS_2019	SAMD00164977	CRC	60	adult	male	JPN	NA	NA	NA	NA	NA	1.91953e+16	NA	NA	NA	NA	NA	NA	NA	NA	NA	NA	NA
YachidaS_2019	SAMD00164978	CRC	51	adult	male	JPN	NA	NA	NA	NA	NA	222290619336	NA	NA	NA	NA	NA	NA	NA	NA	NA	NA	NA
YachidaS_2019	SAMD00164980	CRC	69	senior	male	JPN	NA	NA	NA	NA	NA	2.56801e+16	NA	NA	NA	NA	NA	NA	NA	NA	NA	NA	NA
YachidaS_2019	SAMD00164982	CRC	64	adult	female	JPN	NA	NA	NA	NA	NA	2.5333e+16	NA	NA	NA	NA	NA	NA	NA	NA	NA	NA	NA
YachidaS_2019	SAMD00164983	control	78	senior	male	JPN	NA	NA	NA	NA	NA	233090530697	NA	NA	NA	NA	NA	NA	NA	NA	NA	NA	NA
YachidaS_2019	SAMD00164985	CRC	63	adult	female	JPN	NA	NA	NA	NA	NA	2.35556e+16	NA	NA	NA	NA	NA	NA	NA	NA	NA	NA	NA
YachidaS_2019	SAMD00164986	control	73	senior	male	JPN	NA	NA	NA	NA	NA	2.28928e+16	NA	NA	NA	NA	NA	NA	NA	NA	NA	NA	NA
YachidaS_2019	SAMD00164987	CRC	71	senior	male	JPN	NA	NA	NA	NA	NA	210498179024	NA	NA	NA	NA	NA	NA	NA	NA	NA	NA	NA
YachidaS_2019	SAMD00164990	CRC	64	adult	male	JPN	NA	NA	NA	NA	NA	2.62596e+16	NA	NA	NA	NA	NA	NA	NA	NA	NA	NA	NA
YachidaS_2019	SAMD00164991	CRC	59	adult	male	JPN	NA	NA	NA	NA	NA	280664238698	NA	NA	NA	NA	NA	NA	NA	NA	NA	NA	NA
YachidaS_2019	SAMD00164992	CRC	68	senior	female	JPN	NA	NA	NA	NA	NA	252993759487	NA	NA	NA	NA	NA	NA	NA	NA	NA	NA	NA
YachidaS_2019	SAMD00164993	CRC	68	senior	male	JPN	NA	NA	NA	NA	NA	234375	NA	NA	NA	NA	NA	NA	NA	NA	NA	NA	NA
YachidaS_2019	SAMD00164995	CRC	58	adult	female	JPN	NA	NA	NA	NA	NA	2.25069e+16	NA	NA	NA	NA	NA	NA	NA	NA	NA	NA	NA
YachidaS_2019	SAMD00164996	control	58	adult	male	JPN	NA	NA	NA	NA	NA	222290619336	NA	NA	NA	NA	NA	NA	NA	NA	NA	NA	NA
YachidaS_2019	SAMD00164997	CRC	57	adult	male	JPN	NA	NA	NA	NA	NA	2.70169e+16	NA	NA	NA	NA	NA	NA	NA	NA	NA	NA	NA
YachidaS_2019	SAMD00164998	CRC	61	adult	male	JPN	NA	NA	NA	NA	NA	271020408163	NA	NA	NA	NA	NA	NA	NA	NA	NA	NA	NA
YachidaS_2019	SAMD00164999	control	76	senior	female	JPN	NA	NA	NA	NA	NA	2.15019e+16	NA	NA	NA	NA	NA	NA	NA	NA	NA	NA	NA
YachidaS_2019	SAMD00165000	CRC	77	senior	female	JPN	NA	NA	NA	NA	NA	2.02694e+16	NA	NA	NA	NA	NA	NA	NA	NA	NA	NA	NA
YachidaS_2019	SAMD00165001	control	70	senior	male	JPN	NA	NA	NA	NA	NA	2.268e+16	NA	NA	NA	NA	NA	NA	NA	NA	NA	NA	NA
YachidaS_2019	SAMD00165002	CRC	45	adult	male	JPN	NA	NA	NA	NA	NA	2.22753e+16	NA	NA	NA	NA	NA	NA	NA	NA	NA	NA	NA
YachidaS_2019	SAMD00165003	CRC	59	adult	male	JPN	NA	NA	NA	NA	NA	201994697639	NA	NA	NA	NA	NA	NA	NA	NA	NA	NA	NA
YachidaS_2019	SAMD00165004	control	41	adult	female	JPN	NA	NA	NA	NA	NA	260789715335	NA	NA	NA	NA	NA	NA	NA	NA	NA	NA	NA
YachidaS_2019	SAMD00165005	CRC	67	senior	male	JPN	NA	NA	NA	NA	NA	236244474928	NA	NA	NA	NA	NA	NA	NA	NA	NA	NA	NA
YachidaS_2019	SAMD00165006	CRC	69	senior	male	JPN	NA	NA	NA	NA	NA	238751147842	NA	NA	NA	NA	NA	NA	NA	NA	NA	NA	NA
YachidaS_2019	SAMD00165007	CRC	68	senior	female	JPN	NA	NA	NA	NA	NA	224323025156	NA	NA	NA	NA	NA	NA	NA	NA	NA	NA	NA
YachidaS_2019	SAMD00165008	control	62	adult	male	JPN	NA	NA	NA	NA	NA	2.17079e+16	NA	NA	NA	NA	NA	NA	NA	NA	NA	NA	NA
YachidaS_2019	SAMD00165010	control	51	adult	female	JPN	NA	NA	NA	NA	NA	212305720237	NA	NA	NA	NA	NA	NA	NA	NA	NA	NA	NA
YachidaS_2019	SAMD00165011	CRC	55	adult	male	JPN	NA	NA	NA	NA	NA	225981404959	NA	NA	NA	NA	NA	NA	NA	NA	NA	NA	NA
YachidaS_2019	SAMD00165012	CRC	48	adult	female	JPN	NA	NA	NA	NA	NA	231910946197	NA	NA	NA	NA	NA	NA	NA	NA	NA	NA	NA
YachidaS_2019	SAMD00165014	CRC	59	adult	male	JPN	NA	NA	NA	NA	NA	259515570934	NA	NA	NA	NA	NA	NA	NA	NA	NA	NA	NA
YachidaS_2019	SAMD00165015	control	60	adult	female	JPN	NA	NA	NA	NA	NA	1.85901e+16	NA	NA	NA	NA	NA	NA	NA	NA	NA	NA	NA
YachidaS_2019	SAMD00165016	CRC	67	senior	female	JPN	NA	NA	NA	NA	NA	2.44444e+16	NA	NA	NA	NA	NA	NA	NA	NA	NA	NA	NA
YachidaS_2019	SAMD00165017	CRC	74	senior	female	JPN	NA	NA	NA	NA	NA	2.35556e+16	NA	NA	NA	NA	NA	NA	NA	NA	NA	NA	NA
YachidaS_2019	SAMD00165018	CRC	73	senior	male	JPN	NA	NA	NA	NA	NA	198412698413	NA	NA	NA	NA	NA	NA	NA	NA	NA	NA	NA
YachidaS_2019	SAMD00165019	CRC	46	adult	female	JPN	NA	NA	NA	NA	NA	2.05457e+16	NA	NA	NA	NA	NA	NA	NA	NA	NA	NA	NA
YachidaS_2019	SAMD00165020	control	49	adult	female	JPN	NA	NA	NA	NA	NA	208299951931	NA	NA	NA	NA	NA	NA	NA	NA	NA	NA	NA
YachidaS_2019	SAMD00165021	control	30	adult	male	JPN	NA	NA	NA	NA	NA	NA	NA	NA	NA	NA	NA	NA	NA	NA	NA	NA	NA
YachidaS_2019	SAMD00165022	control	56	adult	male	JPN	NA	NA	NA	NA	NA	240929705215	NA	NA	NA	NA	NA	NA	NA	NA	NA	NA	NA
YachidaS_2019	SAMD00165023	control	77	senior	female	JPN	NA	NA	NA	NA	NA	219261258222	NA	NA	NA	NA	NA	NA	NA	NA	NA	NA	NA
YachidaS_2019	SAMD00165024	control	64	adult	female	JPN	NA	NA	NA	NA	NA	2109375	NA	NA	NA	NA	NA	NA	NA	NA	NA	NA	NA
YachidaS_2019	SAMD00165025	control	43	adult	male	JPN	NA	NA	NA	NA	NA	247409372871	NA	NA	NA	NA	NA	NA	NA	NA	NA	NA	NA
YachidaS_2019	SAMD00165026	control	55	adult	female	JPN	NA	NA	NA	NA	NA	19777698667	NA	NA	NA	NA	NA	NA	NA	NA	NA	NA	NA
YachidaS_2019	SAMD00165027	control	33	adult	female	JPN	NA	NA	NA	NA	NA	2.22063e+16	NA	NA	NA	NA	NA	NA	NA	NA	NA	NA	NA
YachidaS_2019	SAMD00165028	control	74	senior	female	JPN	NA	NA	NA	NA	NA	199099722992	NA	NA	NA	NA	NA	NA	NA	NA	NA	NA	NA
YachidaS_2019	SAMD00165029	control	46	adult	male	JPN	NA	NA	NA	NA	NA	21799445105	NA	NA	NA	NA	NA	NA	NA	NA	NA	NA	NA
YachidaS_2019	SAMD00165030	control	59	adult	male	JPN	NA	NA	NA	NA	NA	265337588296	NA	NA	NA	NA	NA	NA	NA	NA	NA	NA	NA
YachidaS_2019	SAMD00165031	control	65	senior	female	JPN	NA	NA	NA	NA	NA	182563187148	NA	NA	NA	NA	NA	NA	NA	NA	NA	NA	NA
YachidaS_2019	SAMD00165032	control	35	adult	male	JPN	NA	NA	NA	NA	NA	242214532872	NA	NA	NA	NA	NA	NA	NA	NA	NA	NA	NA
YachidaS_2019	SAMD00165033	control	38	adult	female	JPN	NA	NA	NA	NA	NA	178506227433	NA	NA	NA	NA	NA	NA	NA	NA	NA	NA	NA
ThomasAM_2019_c	mix1_N702-N505_CGTACTAG-GTAAGGAG	control	66	senior	female	JP	NA	NA	NA	NA	NA	254108996539792	NA	NA	56699592.0	8092368865.0	75.0	150.0	NA	NA	NA	NA	NA
ThomasAM_2019_c	mix3_N707-N505_CTCTCTAC-GTAAGGAG	control	77	senior	female	JP	NA	NA	NA	NA	NA	236340330075308	NA	NA	52466237.0	7476566924.0	75.0	150.0	NA	NA	NA	NA	NA
ThomasAM_2019_c	mix3_N705-N506_GGACTCCT-ACTGCATA	CRC	69	senior	female	JP	NA	NA	NA	NA	NA	256369171607114	NA	NA	38301340.0	5444567853.0	75.0	150.0	NA	NA	NA	NA	NA
ThomasAM_2019_c	mix3_N706-N506_TAGGCATG-ACTGCATA	control	73	senior	female	JP	NA	NA	NA	NA	NA	20703125	NA	NA	52969206.0	7260060564.0	75.0	150.0	NA	NA	NA	NA	NA
ThomasAM_2019_c	mix2_N707-N503_CTCTCTAC-TATCCTCT	control	74	senior	male	JP	NA	NA	NA	NA	NA	206851502395123	NA	NA	54782874.0	7892346245.0	75.0	150.0	NA	NA	NA	NA	NA
ThomasAM_2019_c	mix6_N707-N504_CTCTCTAC-AGAGTAGA	CRC	51	adult	male	JP	NA	NA	NA	NA	NA	207612456747405	NA	NA	47992936.0	7013851963.0	75.0	150.0	NA	NA	NA	NA	NA
ThomasAM_2019_c	mix2_N708-N504_CAGAGAGG-AGAGTAGA	control	70	senior	male	JP	NA	NA	NA	NA	NA	236614386154678	NA	NA	49237538.0	7167280424.0	75.0	150.0	NA	NA	NA	NA	NA
ThomasAM_2019_c	mix2_N711-N504_AAGAGGCA-AGAGTAGA	CRC	55	adult	male	JP	NA	NA	NA	NA	NA	245778671518401	NA	NA	46519722.0	6692999180.0	75.0	150.0	NA	NA	NA	NA	NA
ThomasAM_2019_c	AHCT5GADXX.N703-S501_AGGCAGAA-TAGATCGC	CRC	62	adult	female	JP	NA	NA	NA	NA	NA	210828132906055	NA	NA	14944862.0	2026501570.0	75.0	150.0	NA	NA	NA	NA	NA
ThomasAM_2019_c	BHCNG3ADXX.N705-S502_GGACTCCT-CTCTCTAT	control	61	adult	male	JP	NA	NA	NA	NA	NA	262335558041742	NA	NA	63257761.0	8959666507.0	75.0	150.0	NA	NA	NA	NA	NA
ThomasAM_2019_c	BHCNG3ADXX.N708-S502_CAGAGAGG-CTCTCTAT	CRC	78	senior	male	JP	NA	NA	NA	NA	NA	226799524092802	NA	NA	14919620.0	2200274236.0	75.0	150.0	NA	NA	NA	NA	NA
ThomasAM_2019_c	HGKT5ADXX_PG0662_09A0202_H2	control	76	senior	male	JP	NA	NA	NA	NA	NA	2.21003e+16	NA	NA	39794462.0	5853343782.0	75.0	150.0	NA	NA	NA	NA	NA
ThomasAM_2019_c	BHCNG3ADXX.N709-S502_GCTACGCT-CTCTCTAT	CRC	30	adult	male	JP	NA	NA	NA	NA	NA	256895619253651	NA	NA	74925301.0	10660532460.0	75.0	150.0	NA	NA	NA	NA	NA
ThomasAM_2019_c	BHCNG3ADXX.N711-S502_AAGAGGCA-CTCTCTAT	CRC	69	senior	female	JP	NA	NA	NA	NA	NA	235555555555556	NA	NA	57011467.0	7870207446.0	75.0	150.0	NA	NA	NA	NA	NA
ThomasAM_2019_c	mix20-N702-S501_CGTACTAG-TAGATCGC	control	71	senior	female	JP	NA	NA	NA	NA	NA	180172064321427	NA	NA	49830870.0	6545486895.0	75.0	149.0	NA	NA	NA	NA	NA
ThomasAM_2019_c	BHCNG3ADXX.N701-S503_TAAGGCGA-TATCCTCT	CRC	59	adult	male	JP	NA	NA	NA	NA	NA	254580659041199	NA	NA	43689354.0	6203986425.0	75.0	150.0	NA	NA	NA	NA	NA
ThomasAM_2019_c	BHCNJJADXX.N703-S503_AGGCAGAA-TATCCTCT	CRC	57	adult	female	JP	NA	NA	NA	NA	NA	1.8369e+16	NA	NA	58779552.0	8380917595.0	75.0	150.0	NA	NA	NA	NA	NA
ThomasAM_2019_c	BHCNJJADXX.N705-S503_GGACTCCT-TATCCTCT	CRC	38	adult	male	JP	NA	NA	NA	NA	NA	2.43911e+16	NA	NA	51410939.0	7472384887.0	75.0	150.0	NA	NA	NA	NA	NA
ThomasAM_2019_c	BHCNJJADXX.N708-S503_CAGAGAGG-TATCCTCT	control	73	senior	male	JP	NA	NA	NA	NA	NA	2.58166e+16	NA	NA	76551905.0	10944706076.0	75.0	150.0	NA	NA	NA	NA	NA
ThomasAM_2019_c	mix21_mix22-N705-S502_GGACTCCT-CTCTCTAT	control	66	senior	male	JP	NA	NA	NA	NA	NA	236652443615762	NA	NA	64394050.0	9052793608.0	75.0	150.0	NA	NA	NA	NA	NA
ThomasAM_2019_c	AHCNC2ADXX.N708_CAGAGAGG	CRC	64	adult	male	JP	NA	NA	NA	NA	NA	2.246e+16	NA	NA	59197060.0	8566556223.0	75.0	150.0	NA	NA	NA	NA	NA
ThomasAM_2019_c	AHCNC2ADXX.N710_CGAGGCTG	CRC	66	senior	female	JP	NA	NA	NA	NA	NA	226002629848784	NA	NA	45265026.0	6457902329.0	75.0	150.0	NA	NA	NA	NA	NA
ThomasAM_2019_c	mix23_mix24-N703-S503_AGGCAGAA-TATCCTCT	control	64	adult	female	JP	NA	NA	NA	NA	NA	23191094619666	NA	NA	41531664.0	5927646089.0	75.0	150.0	NA	NA	NA	NA	NA
ThomasAM_2019_c	BHCTGKADXX.N707-S505_CTCTCTAC-GTAAGGAG	control	45	adult	male	JP	NA	NA	NA	NA	NA	222222222222222	NA	NA	27836202.0	4008571862.0	75.0	150.0	NA	NA	NA	NA	NA
ThomasAM_2019_c	BHCNFHADXX.N710-S505_CGAGGCTG-GTAAGGAG	CRC	65	adult	male	JP	NA	NA	NA	NA	NA	213039485766758	NA	NA	34545896.0	4987063225.0	75.0	150.0	NA	NA	NA	NA	NA
ThomasAM_2019_c	BHCNK3ADXX.N711-S506_AAGAGGCA-ACTGCATA	control	64	adult	male	JP	NA	NA	NA	NA	NA	205191340925413	NA	NA	27181152.0	3784860572.0	75.0	150.0	NA	NA	NA	NA	NA
ThomasAM_2019_c	BHCNK3ADXX.N712-S506_GTAGAGGA-ACTGCATA	CRC	44	adult	female	JP	NA	NA	NA	NA	NA	2.66728e+16	NA	NA	47580560.0	6605607645.0	75.0	150.0	NA	NA	NA	NA	NA
ThomasAM_2019_c	mix29_mix30-N710_CGAGGCTG	control	44	adult	male	JP	NA	NA	NA	NA	NA	220521901834341	NA	NA	36266354.0	5254404985.0	75.0	150.0	NA	NA	NA	NA	NA
ThomasAM_2019_c	BHCNK3ADXX.N706-S507_TAGGCATG-AAGGAGTA	control	59	adult	female	JP	NA	NA	NA	NA	NA	2.00288e+16	NA	NA	35607131.0	5261328729.0	75.0	150.0	NA	NA	NA	NA	NA
ThomasAM_2019_c	mix31_mix32-N702-S506_CGTACTAG-ACTGCATA	control	70	senior	male	JP	NA	NA	NA	NA	NA	257116620752984	NA	NA	43863913.0	6244662788.0	75.0	150.0	NA	NA	NA	NA	NA
ThomasAM_2019_c	AHCNMFADXX.N709-S507_GCTACGCT-AAGGAGTA	CRC	70	senior	female	JP	NA	NA	NA	NA	NA	2.19076e+16	NA	NA	63143577.0	8820156538.0	75.0	150.0	NA	NA	NA	NA	NA
ThomasAM_2019_c	AHCNMFADXX.N712-S507_GTAGAGGA-AAGGAGTA	control	72	senior	male	JP	NA	NA	NA	NA	NA	2.21367e+16	NA	NA	79164015.0	10912549716.0	75.0	150.0	NA	NA	NA	NA	NA
ThomasAM_2019_c	AHCNMFADXX.N703-S508_AGGCAGAA-CTAAGCCT	CRC	61	adult	male	JP	NA	NA	NA	NA	NA	282933454051607	NA	NA	61050723.0	8509340579.0	75.0	150.0	NA	NA	NA	NA	NA
ThomasAM_2019_c	mix31_mix32-N705-S506_GGACTCCT-ACTGCATA	control	75	senior	male	JP	NA	NA	NA	NA	NA	2.23081e+16	NA	NA	50912373.0	7188879827.0	75.0	150.0	NA	NA	NA	NA	NA
ThomasAM_2019_c	BHCNM7ADXX.N712-S508_GTAGAGGA-CTAAGCCT	control	67	senior	female	JP	NA	NA	NA	NA	NA	260416666666667	NA	NA	98446369.0	13885882588.0	75.0	150.0	NA	NA	NA	NA	NA
ThomasAM_2019_c	BHCNM7ADXX.N701-S511_TAAGGCGA-TCTCTCCG	control	50	adult	female	JP	NA	NA	NA	NA	NA	203427977839335	NA	NA	41154961.0	5902309698.0	75.0	150.0	NA	NA	NA	NA	NA
ThomasAM_2019_c	mix33_mix34-N711-S506_AAGAGGCA-ACTGCATA	control	76	senior	male	JP	NA	NA	NA	NA	NA	237953599048186	NA	NA	51991567.0	7361812201.0	75.0	150.0	NA	NA	NA	NA	NA
ThomasAM_2019_c	mix33_mix34-N712-S506_GTAGAGGA-ACTGCATA	control	76	senior	male	JP	NA	NA	NA	NA	NA	258805706350208	NA	NA	47914270.0	6786515087.0	75.0	150.0	NA	NA	NA	NA	NA
ThomasAM_2019_c	mix35_mix36-N712-S507_GTAGAGGA-AAGGAGTA	CRC	28	adult	male	JP	NA	NA	NA	NA	NA	2.62976e+16	NA	NA	47285169.0	6814535752.0	75.0	150.0	NA	NA	NA	NA	NA
ThomasAM_2019_c	HGK7MADXX_PG0662_19A0305_H3_L001	CRC	46	adult	male	JP	NA	NA	NA	NA	NA	191511918197052	NA	NA	44798316.0	6581904182.0	75.0	150.0	NA	NA	NA	NA	NA
ThomasAM_2019_c	HGK7MADXX_PG0662_87A0503_H3_L002	CRC	70	senior	female	JP	NA	NA	NA	NA	NA	173484295105917	NA	NA	39006953.0	5700128483.0	75.0	150.0	NA	NA	NA	NA	NA
ThomasAM_2019_c	HGKMWADXX_PG0662_92A0617_H3_L001	CRC	63	adult	female	JP	NA	NA	NA	NA	NA	174817898022893	NA	NA	43972509.0	6441364925.0	75.0	150.0	NA	NA	NA	NA	NA
ThomasAM_2019_c	HGKMWADXX_PG0662_95A0604_H3_L002	control	65	adult	female	JP	NA	NA	NA	NA	NA	19818927075357	NA	NA	49002817.0	7155344076.0	75.0	150.0	NA	NA	NA	NA	NA
ThomasAM_2019_c	HGKYVADXX_PG0662_98A0607_H3_L001	control	78	senior	male	JP	NA	NA	NA	NA	NA	2.28624e+16	NA	NA	45015592.0	6622800236.0	75.0	150.0	NA	NA	NA	NA	NA
ThomasAM_2019_c	HGKYVADXX_PG0662_104A0704_H3_L001	control	65	adult	male	JP	NA	NA	NA	NA	NA	215645449137418	NA	NA	40762782.0	5937308639.0	75.0	150.0	NA	NA	NA	NA	NA
ThomasAM_2019_c	HGKMWADXX_PG0662_166A0807_H3_L002	CRC	70	senior	male	JP	NA	NA	NA	NA	NA	205761316872428	NA	NA	42472731.0	6223238339.0	75.0	150.0	NA	NA	NA	NA	NA
ThomasAM_2019_c	HGKFCADXX_PG0662_168A0902_H3_L001	control	66	senior	female	JP	NA	NA	NA	NA	NA	223477820880418	NA	NA	31795549.0	4701764620.0	75.0	150.0	NA	NA	NA	NA	NA
ThomasAM_2019_c	HGK52ADXX_PG0662_172A0906_H3_L001	CRC	62	adult	male	JP	NA	NA	NA	NA	NA	2.46181e+16	NA	NA	32410737.0	4762929673.0	75.0	150.0	NA	NA	NA	NA	NA
ThomasAM_2019_c	HGKY7ADXX_PG0662_178A0104_H1_L002	control	76	senior	female	JP	NA	NA	NA	NA	NA	23422090729783	NA	NA	37365403.0	5488973250.0	75.0	150.0	NA	NA	NA	NA	NA
ThomasAM_2019_c	HGKY7ADXX_PG0662_179A0105_H1_L002	control	53	adult	female	JP	NA	NA	NA	NA	NA	1.8662e+16	NA	NA	33940061.0	4999293110.0	75.0	150.0	NA	NA	NA	NA	NA
ThomasAM_2019_c	HGKY7ADXX_PG0662_182A0217_H1_L002	CRC	48	adult	male	JP	NA	NA	NA	NA	NA	230300453514739	NA	NA	33848668.0	4978457429.0	75.0	150.0	NA	NA	NA	NA	NA
ThomasAM_2019_c	HGKY7ADXX_PG0662_239A0206_H1_L001	CRC	45	adult	female	JP	NA	NA	NA	NA	NA	2.34224e+16	NA	NA	30527703.0	4501055927.0	75.0	150.0	NA	NA	NA	NA	NA
ThomasAM_2019_c	HGKYWADXX_PG0662_245A0305_H1_L002	CRC	59	adult	female	JP	NA	NA	NA	NA	NA	2265625	NA	NA	32980110.0	4864004299.0	75.0	150.0	NA	NA	NA	NA	NA
ThomasAM_2019_c	HGKYWADXX_PG0662_249A0402_H1_L002	control	45	adult	male	JP	NA	NA	NA	NA	NA	239512265931195	NA	NA	34579923.0	5107707126.0	75.0	150.0	NA	NA	NA	NA	NA
ThomasAM_2019_c	HGKYWADXX_PG0662_255A0407_H1_L001	CRC	65	adult	male	JP	NA	NA	NA	NA	NA	213839419960573	NA	NA	57290521.0	8421969551.0	75.0	150.0	NA	NA	NA	NA	NA
ThomasAM_2019_c	HGKYWADXX_PG0662_259A0504_H1_L001	CRC	70	senior	male	JP	NA	NA	NA	NA	NA	189619274241523	NA	NA	24661086.0	3625058781.0	75.0	150.0	NA	NA	NA	NA	NA
ThomasAM_2019_c	HGKYVADXX_PG0662_320A0604_H1_L002	control	75	senior	female	JP	NA	NA	NA	NA	NA	226666666666667	NA	NA	40163977.0	5889437146.0	75.0	150.0	NA	NA	NA	NA	NA
ThomasAM_2019_c	HGKY5ADXX_PG0662_332A0817_H1_L001	CRC	69	senior	male	JP	NA	NA	NA	NA	NA	2.15139e+16	NA	NA	36273794.0	5323906020.0	75.0	150.0	NA	NA	NA	NA	NA
ThomasAM_2019_c	HJK7MADXX_PG0783_04A0104_H1_L002	CRC	64	adult	male	JP	NA	NA	NA	NA	NA	231084345786212	NA	NA	42299642.0	6233187350.0	75.0	150.0	NA	NA	NA	NA	NA
ThomasAM_2019_c	HJKJJADXX_PG0783_14A0207_H1_L001	control	76	senior	male	JP	NA	NA	NA	NA	NA	259695290858726	NA	NA	36568983.0	5396372862.0	75.0	150.0	NA	NA	NA	NA	NA
ThomasAM_2019_c	HJKJ2ADXX_PG0783_19A0305_H1_L001	control	40	adult	male	JP	NA	NA	NA	NA	NA	2298190175237	NA	NA	42545246.0	6269767517.0	75.0	150.0	NA	NA	NA	NA	NA
ThomasAM_2019_c	HJK7VADXX_PG0783_22A0417_H1_L001	CRC	49	adult	female	JP	NA	NA	NA	NA	NA	1.93821e+16	NA	NA	40678877.0	5959735682.0	75.0	150.0	NA	NA	NA	NA	NA
ThomasAM_2019_c	HJK7VADXX_PG0783_23A0402_H1_L002	CRC	67	senior	female	JP	NA	NA	NA	NA	NA	201745537476426	NA	NA	36611284.0	5355918440.0	75.0	150.0	NA	NA	NA	NA	NA
ThomasAM_2019_c	HJK7MADXX_PG0783_24A0403_H1_L001	control	76	senior	male	JP	NA	NA	NA	NA	NA	2.17993e+16	NA	NA	41722902.0	6154652868.0	75.0	150.0	NA	NA	NA	NA	NA
ThomasAM_2019_c	HJKJ2ADXX_PG0783_27A0405_H1_L001	CRC	70	senior	male	JP	NA	NA	NA	NA	NA	2.42424e+16	NA	NA	42197959.0	6214343372.0	75.0	150.0	NA	NA	NA	NA	NA
ThomasAM_2019_c	HJK7VADXX_PG0783_31A0502_H1_L002	control	49	adult	female	JP	NA	NA	NA	NA	NA	2.23081e+16	NA	NA	40211990.0	5915999540.0	75.0	150.0	NA	NA	NA	NA	NA
ThomasAM_2019_c	HJKHTADXX_PG0783_55A0104_H1_L001	control	42	adult	male	JP	NA	NA	NA	NA	NA	261738325513103	NA	NA	42003632.0	6174598304.0	75.0	150.0	NA	NA	NA	NA	NA
ThomasAM_2019_c	HJKHTADXX_PG0783_65A0205_H1_L002	CRC	59	adult	female	JP	NA	NA	NA	NA	NA	20956607495069	NA	NA	46652800.0	6844815395.0	75.0	150.0	NA	NA	NA	NA	NA
ThomasAM_2019_c	HJKNLADXX_PG0783_67A0207_H1_L002	control	49	adult	female	JP	NA	NA	NA	NA	NA	212305720237141	NA	NA	41478685.0	6111554309.0	75.0	150.0	NA	NA	NA	NA	NA
ThomasAM_2019_c	HJKHJADXX_PG0783_75A0417_H1_L001	CRC	78	senior	male	JP	NA	NA	NA	NA	NA	259094569517874	NA	NA	40492180.0	5973699847.0	75.0	150.0	NA	NA	NA	NA	NA
ThomasAM_2019_c	HJKNLADXX_PG0783_82A0407_H1_L002	control	63	adult	male	JP	NA	NA	NA	NA	NA	2.20581e+16	NA	NA	60127551.0	8849707571.0	75.0	150.0	NA	NA	NA	NA	NA
ThomasAM_2019_c	HJKNLADXX_PG0783_89A0507_H1_L002	CRC	62	adult	male	JP	NA	NA	NA	NA	NA	2.55937e+16	NA	NA	28065001.0	4132358579.0	75.0	150.0	NA	NA	NA	NA	NA
ThomasAM_2019_c	HJKJJADXX_PG0783_92A0603_H1_L002	CRC	46	adult	female	JP	NA	NA	NA	NA	NA	174449267718772	NA	NA	31822724.0	4688947953.0	75.0	150.0	NA	NA	NA	NA	NA
ThomasAM_2019_c	HJKHJADXX_PG0783_98A0717_H1_L001	CRC	54	adult	female	JP	NA	NA	NA	NA	NA	205688066136624	NA	NA	24779700.0	3652188908.0	75.0	150.0	NA	NA	NA	NA	NA
ThomasAM_2019_c	HJK7NADXX_PG0783_110A0106_H1_L002	control	42	adult	female	JP	NA	NA	NA	NA	NA	2.55937e+16	NA	NA	70495315.0	10370504159.0	75.0	150.0	NA	NA	NA	NA	NA
ThomasAM_2019_c	HJKTNADXX_PG0783_113A0203_H1_L001	control	49	adult	male	JP	NA	NA	NA	NA	NA	2.73982e+16	NA	NA	48649739.0	7159844852.0	75.0	150.0	NA	NA	NA	NA	NA
ThomasAM_2019_c	HJK7NADXX_PG0783_128A0406_H1_L002	CRC	32	adult	female	JP	NA	NA	NA	NA	NA	223477820880418	NA	NA	31362488.0	4610617009.0	75.0	150.0	NA	NA	NA	NA	NA
ThomasAM_2019_c	HJKTNADXX_PG0783_132A0504_H1_L002	CRC	75	senior	female	JP	NA	NA	NA	NA	NA	222222222222222	NA	NA	36890567.0	5403179147.0	75.0	150.0	NA	NA	NA	NA	NA
ThomasAM_2019_c	HJKTNADXX_PG0783_145A0703_H1_L001	CRC	73	senior	female	JP	NA	NA	NA	NA	NA	205456936226167	NA	NA	49742378.0	7264233751.0	75.0	150.0	NA	NA	NA	NA	NA
ThomasAM_2019_c	HJKTNADXX_PG0783_147A0704_H1_L002	control	51	adult	male	JP	NA	NA	NA	NA	NA	283848021613488	NA	NA	43456246.0	6376081747.0	75.0	150.0	NA	NA	NA	NA	NA
